# Supplementary material for: TnpPred: A Web Service for the Robust Prediction of Prokaryotic Transposases
Source: Hindawi journal article supplement (doi:10.1155/2012/678761), 2012-01-01
Supplement: f2 [file 678761.f2.pdf]

**Supplementary file 2**

*Acaryochloris marina* MBIC11017 uid58167 TnpPred annotation in genbank format (.gbk)

```
LOCUS          NC_009925                0 bp    DNA    linear    UNK
ACCESSION      unknown
COMMENT        This looks like a good IS fragment prediction
FEATURES       Location/Qualifiers
    source      1..6503724
                /mol_type="genomic DNA"
                /db_xref="taxon:329726"
                /organism="Acaryochloris marina MBIC11017"
    CDS         19129..19968
                /colour="255 0 0"
                /evidence=predicted
                /translation="TGVLTIT-KIFTNLVSXTSEDIRFIINTKNRXICHFYFYLASKQY
                PQXSLFMNrtIDYCLSKIIYskqfkiVSIERRSGxsrkqQNHsQFAQLFLXLETLGPg
                VQRLFEXXVKLSRYXsVNTQTLDRtXRAMPTAYDSDLTTLQWELLEPLIPAAKP-GGR
                PRT-TDMLSVLNAlFYLVVTGCQWRQLPHDFPCWSTVYSYFRRWRDDGTWVHINEHLR
                MQERVSE-----DRHSPSPAICDAQSVKVGNGPR
                CHSIGFDGgkmvKGRKRHVLDTLGLVL-MVMVTAAN"
                /note="IS5_IS427 e-value= 4.4e-06 complete sequence hit
                coverage= 100%, between model( 296 aa) positions 1; 296
                length is 280aa with 33 gaps, 7 stops, absolute frame=
                Plus1"
    CDS         19486..20337
                /colour="255 0 0"
                /evidence=predicted
                /translation="TQTLDRtXRAM-----PTAYDSDLTTLQWELLEPLIPAAK----
                ---PGGRPRTTDMLSVLNAlFYLVVTGCQWRQLPHDFPCWSTVYSYFRRWRDDGTWVH
                INEHLRMQERVSEDRHSPSPAICDAQSVKVGNGPRCH-SIGFDGgkmvKGRKRHVLD
                TLGLVLMVMVTAANISDQR-GAKILFWKARRQGaslSRLVRIWADAGYQGQALMKWVM
                DRFQYVLEVVKRSDNLAGFQVVKRWIVERTFGWLLWSRRLNKDYEVLTTRTAEALAYV
                AMIRLMVRRLAQEhXNFSNLS"
                /note="IS5_IS1031 e-value= 1.9e-108 complete sequence hit
                coverage= 100%, between model( 295 aa) positions 1; 295
                length is 284aa with 14 gaps, 2 stops, absolute frame=
                Plus1"
    CDS         19528..20337
                /colour="255 0 0"
                /evidence=predicted
                /translation="YDSDLTTLQWELLEPLIPAAK-----PGGRPRTTDMLSVLNAl
                IFYLVVTGCQWRQLPHDFPCWSTVYSYFRRWRDDGTWVHINEHLRMQERVSEDRHSP
                SAAICDAQSVKVGNGPRCH-SIGFDGgkmvKGRKRHVLDTLGLVLMVMVTAANISDQR
                -GAKILFWKARRQGaslSRLVRIWADAGYQGQALMKWVMDRFQYVLEVVKRSDNLAGF
                QVVKRWIVERTFGWLLWSRRLNKDYEVLTTRTAEALAYVAMIRLMVRRLAQEhXNFSN
                SLS"
                /note="IS5_IS1031 e-value= 1.3e-110 fragment hit
                coverage= 93.56%, between model( 295 aa) positions 20;
                295 length is 270aa with 9 gaps, 1 stops, absolute frame=
                Plus1"
    CDS         19537..19776
                /colour="255 0 0"
                /evidence=predicted
                /translation="DLTTLQWELLEPLIPAAKP-GGRPRT-TDMLSVLNAlFYLVVTG
                CQWRQLPHDFPCWSTVYSYFRRWRDDGTWVHINEHLRM"
                /note="IS5_IS427 e-value= 3.3e-18 fragment hit coverage=
                27.70%, between model( 296 aa) positions 125; 206 length
                is 80aa with 2 gaps, 0 stops, absolute frame= Plus1"
    CDS         57724..58665
```

/colour="255 0 0"  
 /evidence=predicted  
 /translation="TKNRXPMSYQIRNWSEYNAGLKQRGSVTFWLEQS--AIVHWLET  
 TPRQKRGASLTYSDTAISTFETVKCIYGLAGRQTEGFLNSLFELMGIELPVC DHSTVS  
 RRRKGQLSISLPIPKQGAIHVVIDSTGIKVYG-----EGEWKTRQHGV S-K  
 RRTWRKLHLSVDESTGEILTGVVTTNDVQDGEVFE DLLEGIDD-----EIEQVSAD-G  
 AYDQSHCYDALMERNATAAIPPRKNA-----KIWQHGN C--NApphpRDQ  
 NLRAIRKQGRKRWKKQAHYHRRSLAETTMFRFKTIFGGQVRSRNF DNQATELLLOCAA  
 LN-RMIQIAKPETVWVE"  
 /note="IS5\_IS903 e-value= 9.4e-98 complete sequence hit  
 coverage= 100%, between model( 347 aa) positions 1; 347  
 length is 314aa with 37 gaps, 1 stops, absolute frame=  
 Plus1"  
 CDS 57724..58665  
 /colour="255 0 0"  
 /evidence=predicted  
 /translation="TKNRXPMSYQIRNWSEYNAGLKQRGSVTFWLEQS--AIVHWLET  
 TPRQKRGASLTYSDTAISTFETVKCIYGLAGRQTEGFLNSLFELMGIELPVC DHSTVS  
 RRRKGQLSISLPIPKQGAIHVVIDSTGIKVYG-----EGEWKTRQHGV S-K  
 RRTWRKLHLSVDESTGEILTGVVTTNDVQDGEVFE DLLEGIDD-----EIEQVSAD-G  
 AYDQSHCYDALMERNATAAIPPRKNA-----KIWQHGN C--NApphpRDQ  
 NLRAIRKQGRKRWKKQAHYHRRSLAETTMFRFKTIFGGQVRSRNF DNQATELLLOCAA  
 LN-RMIQIAKPETVWVE"  
 /note="IS5\_IS903 e-value= 1.7e-97 complete sequence hit  
 coverage= 100%, between model( 347 aa) positions 1; 347  
 length is 314aa with 37 gaps, 1 stops, absolute frame=  
 Plus1"  
 CDS 322582..322968  
 /colour="255 0 0"  
 /evidence=predicted  
 /translation="YADESGMDHRDEYDY-AYGPKGE-----RVYA-LKTG-  
 RRRSGRVNMIAALRAKQL--MAPFTIEGACNRTVFELwLERCLIPv lKPGQKLVI--DN  
 ATFHKGGQIQELVEKAG--CEVWYLPPYSPDLNKIERSWSWIKSRIR"  
 /note="IS630 e-value= 1.1e-13 fragment hit coverage=  
 38.83%, between model( 376 aa) positions 188; 333 length  
 is 129aa with 20 gaps, 0 stops, absolute frame= Plus1"  
 CDS 439435..439710  
 /colour="255 0 0"  
 /evidence=predicted  
 /translation="KQQLQLP-VTLARIDRFDLLFLDNVGDVKKLDFETS VLVFEXIAH  
 QYKRCSFLIIANYPFSEWDIIFR-DSMMMVAVDRLVHHALIIIEIKAESY"  
 /note="IS21\_ORF2 e-value= 4.1e-16 fragment hit coverage=  
 36.43%, between model( 258 aa) positions 148; 241 length  
 is 92aa with 2 gaps, 1 stops, absolute frame= Plus1"  
 CDS 470638..470901  
 /colour="255 0 0"  
 /evidence=predicted  
 /translation="FSYLLIQPLCGHPK-THKHGKTSKGSQRYRCPHCQQTFSATLD  
 TLYYRRqISSETIQITILQSHAEGSSLRGLSRITGVAFNTCVSVIR"  
 /note="IS1\_ORF1 e-value= 4.6e-14 fragment hit coverage=  
 36.40%, between model( 239 aa) positions 1; 87 length is  
 88aa with 1 gaps, 0 stops, absolute frame= Plus1"  
 CDS 689482..689622  
 /colour="255 0 0"  
 /evidence=predicted  
 /translation="SEYIHKSHNVSVLLYHLVFPKYRRALF----DES VDEVLR-NI  
 CMDIENRF"  
 /note="IS200 e-value= 3.9e-06 fragment hit coverage=  
 33.77%, between model( 154 aa) positions 1; 52 length is  
 47aa with 5 gaps, 0 stops, absolute frame= Plus1"

CDS 689482..689604  
/colour="255 0 0"  
/evidence=predicted  
/translation="SEYIHKSHNVSVLLYHLVFPKAYRRALFDES-----VDEVLRNICM"  
/note="IS200\_IS605 e-value= 3.1e-06 fragment hit coverage= 30.07%, between model( 153 aa) positions 1; 46 length is 41aa with 5 gaps, 0 stops, absolute frame= Plus1"

CDS 689875..690138  
/colour="255 0 0"  
/evidence=predicted  
/translation="LFYFLMQCPLCGHPK-THKHGKTSKGSQRYRCPHCQOTFS-EtfDTLCYRRQISPETIQITILQAHVEGSSLRGLSRITGVAYNTCVSVVR"  
/note="IS1\_ORF1 e-value= 1.7e-15 fragment hit coverage= 36.40%, between model( 239 aa) positions 1; 87 length is 88aa with 2 gaps, 0 stops, absolute frame= Plus1"

CDS 850231..851292  
/colour="255 0 0"  
/evidence=predicted  
/translation="IVKRXKN-----EQCIVSHpYPALXPPQPLAQG---ISSA--- --RQXHFEXEQRRQRXSENCVSRASSRPIDAAIRDRKKSlnVLTp--NQRQMVRLQODYSIRQICQVLNYPRSQVYYHARGQP-----DESELKAAIAGVAGAYP-TYGYRRI TAQLQ---RQGYCVNHKRVARLMRQIGIMAKTKVK-RKRTTNSEHSfpRYGNRVLNLS --IDHPEQVWVADITYIRLQ-QEFVYLAVVMDVFTRAIRGWHLsrHIDQQLTLRALNK ALERAT---PEIHHS-----DQGVQYAAAAYMQLLQHQVQISMAEVGQAWQNGYAER LMRTIKEEEVD--LSDYRNFTEAYEHIEQFLEDVYMHKRIHSSLGYLTPCEYEQQWRQ Q"  
/note="IS3\_IS150\_ORF2 e-value= 1.7e-22 complete sequence hit coverage= 100%, between model( 389 aa) positions 1; 389 length is 354aa with 39 gaps, 5 stops, absolute frame= Plus1"

CDS 850270..851316  
/colour="255 0 0"  
/evidence=predicted  
/translation="HPYPALXPPQ--PLAQGI--SSARQXHFEXEQRRQRXSENCVSRASSRPIDAAiRDRKKSlnVLTpNQRQMVRLQODY--SIRQICQVLNYPRSQVYYH ARGQPDESELKAAIAGVAGAYPTYGYRRI TAQLQRQGYCVNHKRVARLMRQIGIMAKT KV-KRKRttnsehsfpRYGNRVLNLSIDHPEQVWVADITYIRLQ--QEFVYLAVVMDV FTRAIRGWHLsrHIDQQLTLRALNKALE-RATPEIHHS DQGVQYAAAAYMQLLQHQV QISMAEVGQAWQNGYAERLMRTIKEEEVDLSDYRNFTEAYEHIEQFLEDVYMHKRIHS SLGYLTPCEYEQQWRQNNHYCMNK"  
/note="IS3\_IS407\_ORF2 e-value= 6.3e-13 complete sequence hit coverage= 100%, between model( 344 aa) positions 1; 344 length is 349aa with 10 gaps, 4 stops, absolute frame= Plus1"

CDS 850405..851289  
/colour="255 0 0"  
/evidence=predicted  
/translation="PIDAAIRDRKKSlnVLTpNQRQMVRLQODYSIRQICQVLNYP RSQVYYHARGQPDESELKAAIAGV-AGAYPTYGYRRI TAQLQRQGYCVNHKRVARLMR QIGIMAKTKVK----RKRTTNSEHSF-PRYGNRvlnLSIDHPEQVWVADITYIRL--Q QEFVYLAVVMDVFTRAIRGWHLsrHIDQQLTLRALNKALER----ATPEIHHS DQGVQ YAAAAYMQLLQHQVQISMAEVGQAWQNGYAERLMRTIKEEEVDLSDYRNF--EAYE HIEQFLEDVYMHKRIHSSLGYLTPCEYEQQWRQ"  
/note="IS3\_IS150\_ORF1 e-value= 4.3e-49 complete sequence hit coverage= 100%, between model( 306 aa) positions 1; 306 length is 295aa with 14 gaps, 0 stops, absolute frame= Plus1"

CDS 850441..851325

```

/colour="255 0 0"
/evidence=predicted
/translation="LNVLTPNQKROMVRQLQOD-YSIROICQVLNYPQRSQVYYHARGO
PD-----ESELKAAIAGVAGAYPTYGYRRITAQLQRQGYC---
VNHKRVARLMRQIGIMAKTKVKRKR-TTNSEHSFPRYGnRVLNLSIDHPEQVWVADIT
YI-----RLQO-----EFVYLAVVMDVFTRAIRGWHLRSH----IDQ
QLTLRALNKALERAT-PEIHSDQGVQYAAA----AYMQLLQHQVQISMAEVGQAWQ
NGYAERLMRTIKEEEVDLSD---YRNFTEAYEHIEQFLEDvYMHKRIHSSLGYLTPCE
YEQQWRQONNHYCMNKEDS"
/note="IS481 e-value= 2.9e-08 complete sequence hit
coverage= 100%, between model( 351 aa) positions 1; 351
length is 295aa with 58 gaps, 0 stops, absolute frame=
Plus1"
CDS      850441..851325
/colour="255 0 0"
/evidence=predicted
/translation="LNVLTPNQK-RQMVRLQqDYSIROICQVLNYP---RSQVYYHA
RgQPDESELKA--AIAGV-----AGA---YPTYGYRRITAQLQRQGYCVNHKRVAR
LMRQIGIMAKTKVKRKRRTTNSEHSFPRYGNRVL-NLSIDHPEQVWVADITYIRLQOEF
VYLAVVMDVFTRAIRGWHLRSHIDQQLTLRALNKALERATPE-----IHSDQGV
QYAAAAYMQLLQHQVQISMAEVGQAWQNGYAERLMRTIKEEEVDLSDYrnFTEAYEH
IEQFLEDV--YMHKRIHSSLGYLTPCEYEQQWRQONNHYCMNKEDS"
/note="IS3_IS51_ORF2      e-value= 1.6e-26 complete sequence
hit coverage= 100%, between model( 317 aa) positions 1;
317 length is 295aa with 27 gaps, 0 stops, absolute
frame= Plus1"
CDS      850447..850701
/colour="255 0 0"
/evidence=predicted
/translation="VLTPNQKROMVRQLQODY--SIROICQVLNYPQRSQVYYHARGOP
DESELKAAIAGVAGAYPTYGYRRITAQLQRQGYCVNHKRVARL"
/note="IS3_IS407_ORF2      e-value= 1.2e-17 fragment hit
coverage= 25.29%, between model( 344 aa) positions 60;
146 length is 85aa with 2 gaps, 0 stops, absolute frame=
Plus1"
CDS      850450..851301
/colour="255 0 0"
/evidence=predicted
/translation="LTPNQKROMVRQL-QQDYSIROICQVLNYPQRSQVYYHARG----
-----QPDESELKAAIAGVAGAYPTYGYRRITAQLQRQGY-----CVNHKRVARLM
RQIGIM--AKTKVKRK-RttNSEHSfprYGNRVLNLSIDHPEQVWVAD-ITYIRLQOE
FVYLAVVMDVFTRAIRGWH-----LSRHIDQQLTLRALNK---ALERATPEIHH-SD
QGVQYAAAAYMQLLQHQVQISMAEVGQAWQNGYAERLMRTIKEEEVDLSDYRNFTEA
YEHIEQFLEDvYMHKRIHSSLGYLTPCEYEQQWRQONNH"
/note="IS3_IS2_ORF2      e-value= 2.2e-08 complete sequence
hit coverage= 100%, between model( 302 aa) positions 1;
302 length is 284aa with 31 gaps, 0 stops, absolute
frame= Plus1"
CDS      850465..851292
/colour="255 0 0"
/evidence=predicted
/translation="KROMVRQLQODYSIROICQVLNYPQRSQVYYHARGOP-----DES
ELKAAIAGVAGAYP-TYGYRRITAQLQ---RQGYCVNHKRVARLMRQIGIMAKTKVK-
RKRTTNSEHSfprYGNRVLNLS--IDHPEQVWVADITYIRLQ-QEFVYLAVVMDVFTR
AIRGWHLRSHIDQQLTLRALNKALERAT---PEIHSS-----DQGVQYAAAAYMQLLQ
QHQVQISMAEVGQAWQNGYAERLMRTIKEEEVD--LSDYRNFTEAYEHIEQFLEDVYM
HKRIHSSLGYLTPCEYEQQWRQO"
/note="IS3_IS150_ORF2      e-value= 2.2e-47 fragment hit
coverage= 76.09%, between model( 389 aa) positions 94;
389 length is 276aa with 23 gaps, 0 stops, absolute

```

```

frame= Plus1"
CDS      850468..851316
         /colour="255 0 0"
         /evidence=predicted
         /translation="RQMVRQLQODYSIRQICQVLNYPQRSQVYYHA-----RG
QPDEsELKAAIAGV-AGAYPTYGYRRITAQLQRQGYCVNHKRVARLMRQIGIMAKTKV
KRRRTTNSEHSFPRYGNRVL-NLSIDHPEQVWVADITYIRLQQEFVYLAVVMDVFTRA
IRGWHLsrHIDQQLT-LRALNKALERATPE-----IHSDQGVQYAAAAYMQLLQQ
HQVQISMAEVGQAWQNGYAERLMRTIKKEEVDL---S-DYRNFTEAYEHIEQFLEDVY
MhkRIHSSLGylTPCEYEQQWRQONNHycMnk"
         /note="IS3_IS51_ORF1      e-value= 6.3e-51 complete sequence
hit coverage= 100%, between model( 307 aa) positions 1;
307 length is 283aa with 25 gaps, 0 stops, absolute
frame= Plus1"
CDS      850468..851316
         /colour="255 0 0"
         /evidence=predicted
         /translation="RQMVRQLQODYSIRQICQVLNYPQRSQVYYHA-----RG
QPDEsELKAAIAGV-AGAYPTYGYRRITAQLQRQGYCVNHKRVARLMRQIGIMAKTKV
KRRRTTNSEHSFPRYGNRVL-NLSIDHPEQVWVADITYIRLQQEFVYLAVVMDVFTRA
IRGWHLsrHIDQQLT-LRALNKALERATPE-----IHSDQGVQYAAAAYMQLLQQ
HQVQISMAEVGQAWQNGYAERLMRTIKKEEVDL---S-DYRNFTEAYEHIEQFLEDVY
MhkRIHSSLGylTPCEYEQQWRQONNHycMnk"
         /note="IS3_IS51_ORF1      e-value= 8.1e-53 complete sequence
hit coverage= 100%, between model( 307 aa) positions 1;
307 length is 283aa with 25 gaps, 0 stops, absolute
frame= Plus1"
CDS      850471..851286
         /colour="255 0 0"
         /evidence=predicted
         /translation="QMVRQLQODYSIRQICQVLNYPQRSQVYYHARG--QPD-----ES
ELKAAI-AGVAGAYPTYGYRRITAQLQ-RQGYCVNHKRVARLMRQIGIMAKTKVKKRR
TTNSEHSfPRYGNRVLNLS-IDHPEQVWVADITYIRLQQEFVYLAVVMDVFTRAIRGW
HLSRHIDQQLTLRALNKALERA-TPE--IHSDQGVQYAAAAYMQLLQQHQVQISMAE
VGQAWQNGYAERLMRTIK-EEEVDL-SDYRNFTEAYEHIEQFLEDVYMhkRIHSSLGY
LTPCEYEQQWR"
         /note="IS3_IS3_ORF1      e-value= 9.5e-54 complete sequence
hit coverage= 100%, between model( 286 aa) positions 1;
286 length is 272aa with 15 gaps, 0 stops, absolute
frame= Plus1"
CDS      850471..851286
         /colour="255 0 0"
         /evidence=predicted
         /translation="QMVRQLQODYSIRQICQVLNYPQRSQVYYHARG--QPD-----ES
ELKAAI-AGVAGAYPTYGYRRITAQLQ-RQGYCVNHKRVARLMRQIGIMAKTKVKKRR
TTNSEHSfPRYGNRVLNLS-IDHPEQVWVADITYIRLQQEFVYLAVVMDVFTRAIRGW
HLSRHIDQQLTLRALNKALERA-TPE--IHSDQGVQYAAAAYMQLLQQHQVQISMAE
VGQAWQNGYAERLMRTIK-EEEVDL-SDYRNFTEAYEHIEQFLEDVYMhkRIHSSLGY
LTPCEYEQQWR"
         /note="IS3_IS3_ORF1      e-value= 2.5e-54 complete sequence
hit coverage= 100%, between model( 286 aa) positions 1;
286 length is 272aa with 15 gaps, 0 stops, absolute
frame= Plus1"
CDS      850474..851289
         /colour="255 0 0"
         /evidence=predicted
         /translation="MVRQLQODYSIRQICQVLNYPQRSQVYYHARGQPDESELKAAIAG
V-AGAYPTYGYRRITAQLQRQGYCVNHKRVARLMRQIGIMAKTKVK----RKRTTNSE
HSF-PRYGNRvlnLSIDHPEQVWVADITYIRL--QQEFVYLAVVMDVFTRAIRGWHLs
RHIDQQLTLRALNKALER----ATPEIHSDQGVQYAAAAYMQLLQQHQVQISMAEVG

```

QAWQNGYAERLMRTIKEEEVDLSDYRNFT--EAYEHIEQFLEDVYMHKRIHSSLGYLT  
PCEYEQQWRQ"  
/note="IS3\_IS150\_ORF1 e-value= 6.3e-50 fragment hit  
coverage= 92.81%, between model( 306 aa) positions 23;  
306 length is 272aa with 14 gaps, 0 stops, absolute  
frame= Plus1"  
CDS 850483..851298  
/colour="255 0 0"  
/evidence=predicted  
/translation="QLQQDYSIRQICQVLNYPQRSQVYYHARGQPDE-----SEL  
KAAIAGVAGayPTYGYRRITAQLQRQGYCVNHKRVARLMRQIGIMAKTKVKKRRTTNS  
EHSFPRY---GNRVLNLSIDHPEQVWVADITYIRLQQEFVYLA VMDVFTRAIRGWHL  
SRHIDQQLTLRALNKALER----ATPE---IHHS DQGVQYAAAAAYMQLLQHQVQISM  
AEVGQAWQNGYAERLMRTIKEEEVDLSDYRNFT EAYEHIEQFLEDVYMHKRIHSSLGY  
LTPCEYEQQWRQNN"

/note="IS3\_IS3\_ORF2 e-value= 1.2e-64 complete sequence  
hit coverage= 100%, between model( 288 aa) positions 1;  
288 length is 272aa with 19 gaps, 0 stops, absolute  
frame= Plus1"  
CDS 850483..851298  
/colour="255 0 0"  
/evidence=predicted  
/translation="QLQQDYSIRQICQVLNYPQRSQVYYHARGQPDE-----SEL  
KAAIAGVAGayPTYGYRRITAQLQRQGYCVNHKRVARLMRQIGIMAKTKVKKRRTTNS  
EHSFPRY---GNRVLNLSIDHPEQVWVADITYIRLQQEFVYLA VMDVFTRAIRGWHL  
SRHIDQQLTLRALNKALER----ATPE---IHHS DQGVQYAAAAAYMQLLQHQVQISM  
AEVGQAWQNGYAERLMRTIKEEEVDLSDYRNFT EAYEHIEQFLEDVYMHKRIHSSLGY  
LTPCEYEQQWRQNN"

/note="IS3\_IS3\_ORF2 e-value= 3.3e-65 complete sequence  
hit coverage= 100%, between model( 288 aa) positions 1;  
288 length is 272aa with 19 gaps, 0 stops, absolute  
frame= Plus1"  
CDS 850552..850710  
/colour="255 0 0"  
/evidence=predicted  
/translation="YHARGQPDESELKAAIAGVAGAYPTYGYRRITAQLQRQGY----  
-CVNHKRVARLMRQ"

/note="IS3\_IS2\_ORF2 e-value= 9.1e-09 fragment hit  
coverage= 18.87%, between model( 302 aa) positions 48;  
104 length is 53aa with 5 gaps, 0 stops, absolute frame=  
Plus1"  
CDS 850618..851301  
/colour="255 0 0"  
/evidence=predicted  
/translation="YPTYGYRRITAQLQRQGYCVNHKRVARLMRQIGIMAKTKVKKR  
TTNSEHSFPRYGNRVL-NLSIDHPEQVWVADITYIRLQQEFVYLA VMDVFTRAIRGW  
HLSRHIDQQLTLRALNKALERATPE-----IHHS DQGVQYAAAAAYMQLLQHQVQ  
ISMAEVGQAWQNGYAERLMRTIKEEEVDLSDYrnFT EAYEHIEQFLEDV--YMHKRIH  
SSLGYLTPCEYEQQWRQNNH"

/note="IS3\_IS51\_ORF2 e-value= 1.9e-38 fragment hit  
coverage= 74.76%, between model( 317 aa) positions 73;  
309 length is 228aa with 11 gaps, 0 stops, absolute  
frame= Plus1"  
CDS 943111..944052  
/colour="255 0 0"  
/evidence=predicted  
/translation="TKNRXPMSYQIRNWSEYNAGLKQRGSVTFWLEQS--AIVHWLET  
TPRQKRGASLTYSDTAISTFETVKCIYGLAGRQTEGFLNSLFELMGIELPVC DHSTVS  
RRKGQLSISLPVIPKQGAIHVVIDSTGIKVYG-----EGEWKTRQHGVS-K  
RRTWRKLHLSVDESTGEILTGVVTTNDVQDGEVFEDLLEGIDD-----EIEQVSAD-G

AYDQSHCYDALMERNATAAIPPRKNA-----KIWQHNC--NApphpRDQ  
 NLRAIRKQGRKRWKKQAHYHRRSLAETTMFRFKTIFGGQVRSRNFNDQATELLLOCAA  
 LN-RMIQIAKPETVWVE"  
 /note="IS5\_IS903 e-value= 9.4e-98 complete sequence hit  
 coverage= 100%, between model( 347 aa) positions 1; 347  
 length is 314aa with 37 gaps, 1 stops, absolute frame=  
 Plus1"  
 CDS 943111..944052  
 /colour="255 0 0"  
 /evidence=predicted  
 /translation="TKNRXPMYSYQIRNWSEYNAGLKQRGSVTFWLEQS--AIVHWLET  
 TPRQKRGASLTYSDTAISTFETVKCIYGLAGROTEGFLNSLFELMGIELPVCDDHSTVS  
 RRKGQLSISLPVIPKQGAIHVVIDSTGIKVYG-----EGEWKTRQHGVS-K  
 RRTWRKLHLSVDESTGEILTGVVTTNDVQDGEVFEFLLEGIDD-----EIEQVSAD-G  
 AYDQSHCYDALMERNATAAIPPRKNA-----KIWQHNC--NApphpRDQ  
 NLRAIRKQGRKRWKKQAHYHRRSLAETTMFRFKTIFGGQVRSRNFNDQATELLLOCAA  
 LN-RMIQIAKPETVWVE"  
 /note="IS5\_IS903 e-value= 1.7e-97 complete sequence hit  
 coverage= 100%, between model( 347 aa) positions 1; 347  
 length is 314aa with 37 gaps, 1 stops, absolute frame=  
 Plus1"  
 CDS 1300873..1301259  
 /colour="255 0 0"  
 /evidence=predicted  
 /translation="YADESGMDHRDEYDY-AYGPKGE-----RVYA-LKTG-  
 RRSGRVNMIAALRAKQL--MAPFTIEGACNRTVFELwLERCLIPvIKPGQKLVII--DN  
 ATFHKGGQIQELVEKAG--CEVWYLPPYSPDLNKIERSWSWIKSRIR"  
 /note="IS630 e-value= 1.1e-13 fragment hit coverage=  
 38.83%, between model( 376 aa) positions 188; 333 length  
 is 129aa with 20 gaps, 0 stops, absolute frame= Plus1"  
 CDS 1334545..1335405  
 /colour="255 0 0"  
 /evidence=predicted  
 /translation="IQVELRGSIHXP1NLKMRHPYDSDLTLDQWELLRPLLPAKAK--  
 -----SGRPRRVNLLAVVNAIFYLLRSGCPWRLIPHDFPAWQTVYTYFRQWEADGTW  
 ERLNRALREKLRIQAGRHRHPSAACVDSQSVKTAGAAQE--KGFDDGGKVKGRKRTIL  
 VDTMGLLIGATVHSARRSDHQ-GMILLGLWFSAFWQSIQLIWDQTFGGQAFTAWFQK  
 TFGWTMEVVKRPEEQGFVLP RRWVVERTFAWFGHYRRLSKDYEYLP TTTSEMMLYAA  
 MVNLMLKRLAXIFSNTLLEAV"  
 /note="IS5\_IS1031 e-value= 2.7e-109 complete sequence hit  
 coverage= 100%, between model( 295 aa) positions 1; 295  
 length is 287aa with 10 gaps, 2 stops, absolute frame=  
 Plus1"  
 CDS 1334545..1335384  
 /colour="255 0 0"  
 /evidence=predicted  
 /translation="IQVELRGSIHXP1NLKMRHPYDSDLTLDQWELLRPLLPAKAKSG  
 -----GRPRRVNLLAVVNAIFYLLRSGCPWRL--IPHD  
 FPAWQTVYTYFRQWEADGTWERLNRALREKLRIQAG---RHRHPSAACVDSQSVKTAG  
 A-----  
 -----AQEKGFDDGGKVKGRKRT  
 ILVDTMGLLIGA-----TVHSARRSDHQGMILLGLWFSAFWQSIQLIWI  
 TDQTFGGQAFTAWFQKTFGWTMEVVKRPEEQGFVLP RRWVVERTFAWFGHYRRLSK  
 DYEYLP TTTSEMMLYAA MVNLMLKRLAXIFS"  
 /note="IS5\_IS5 e-value= 6.1e-15 complete sequence hit  
 coverage= 100%, between model( 422 aa) positions 1; 422  
 length is 280aa with 142 gaps, 2 stops, absolute frame=  
 Plus1"  
 CDS 1334599..1335378  
 /colour="255 0 0"

```

/evidence=predicted
/translation="RHPYDSDLTLDQWELLRPLLPKAK-----SGGRPRRVNLLAV
VNAIFYLLRSGCPWRLIPHDFPAWQTVYTYFRQWEADGTWERLNRALREKLRIQAGRH
RHPSAACVDSQS SVKTAGAAQE--KGFDDGGKKVKGRKRTILVDTMGLLIGATVHSARRS
DHQ-GMILLGLWFSAFWQSIQLIWTDQTFGGQAF TAWFQKTFGW TMEVVKRPEEQQGF
EVLPRRWVVERTFAWFGHYRRLSKDYEYLP T TSEMMLYAAMVNLMLKRLAXI"
/note="IS5_IS1031 e-value= 3.5e-110 fragment hit
coverage= 91.53%, between model( 295 aa) positions 17;
286 length is 260aa with 10 gaps, 1 stops, absolute
frame= Plus1"
CDS 1334629..1334862
/colour="255 0 0"
/evidence=predicted
/translation="DQWELLRPLLP--KAKSGGRPRRVNLLAVVNAIFYLLRSGCPWR
LIPHDFPAWQTVYTYFRQWEADGTWERLNRALREKL"
/note="IS5_IS427 e-value= 7.9e-16 fragment hit coverage=
27.03%, between model( 296 aa) positions 129; 208 length
is 78aa with 2 gaps, 0 stops, absolute frame= Plus1"
CDS 1334704..1334931
/colour="255 0 0"
/evidence=predicted
/translation="AVVNAIFYLLRSGCPWRL--IPHDFPAWQTVYTYFRQWEADGTW
ERLNRALREKLRIQAG---RHRHPSAACVDSQS SVKTA"
/note="IS5_IS5 e-value= 7.9e-09 fragment hit coverage=
19.19%, between model( 422 aa) positions 79; 159 length
is 76aa with 5 gaps, 0 stops, absolute frame= Plus1"
CDS 1334932..1335384
/colour="255 0 0"
/evidence=predicted
/translation="GAAQEKGFDDGGKKVKGRKRTILVDTMGLLIGA-----
---TVHSARRSDHQGMILLGLWFSAFWQSIQLIWTDQTFGGQAF TAWFQKTFGW TMEV
VKRPEEQQGF EVLPRRWVVERTFAWFGHYRRLSKDYEYLP T TSEMMLYAAMVNLMLKR
LAXIFS"
/note="IS5_IS5 e-value= 1.2e-15 fragment hit coverage=
39.34%, between model( 422 aa) positions 257; 422 length
is 151aa with 15 gaps, 1 stops, absolute frame= Plus1"
CDS 1474789..1475553
/colour="255 0 0"
/evidence=predicted
/translation="-----TGVYKQTFkrMLHAWHTHHLGRSN--AGRPPKLCRPDQL
LVALQYWREYR TYFH IAGDWEVSESTVCRIVHQVETALMNSGLFRLPGQKSLLOQFER
PDVVVMDVTETPIERPQKRQKAYYSGKKRDIPS NARLSLTAT--LXRLSV-----
XALAQAVGMIFr s s r f q v S I S I Q I P R V C K I A D I K G L O P T --TPTAM----FLSRSHNT
VNXLPCSESI T V l x v k n E W A l n t l N R S L K I F R I L S E R Y R N R R R R Y T L R C N L I A A L Y N H
EL"
/note="IS5_ISL2 e-value= 2.2e-49 complete sequence hit
coverage= 100%, between model( 260 aa) positions 1; 260
length is 255aa with 23 gaps, 3 stops, absolute frame=
Plus1"
CDS 1474852..1475160
/colour="255 0 0"
/evidence=predicted
/translation="RSNAGRPPKLCRPDQLLVALQYWREYR TYFH IAGDWEVSESTVC
RIVHQVETALMNSGLFRLPGQKSLLOQFERPDVVVMDVTETPIERPQKRQKAYYSGKK
R"
/note="IS5_ISL2 e-value= 1.5e-44 fragment hit coverage=
39.62%, between model( 260 aa) positions 27; 129 length
is 103aa with 0 gaps, 0 stops, absolute frame= Plus1"
CDS 1475446..1475553
/colour="255 0 0"

```



```

/evidence=predicted
/translation="NRSLKIFRILSERYRNRYYYYTLRCNLIAALYNHEL"
/note="IS5_ISL2 e-value= 1.1e-16 fragment hit coverage=
13.85%, between model( 260 aa) positions 225; 260 length
is 36aa with 0 gaps, 0 stops, absolute frame= Plus1"
CDS 1499707..1499970
/colour="255 0 0"
/evidence=predicted
/translation="LFYFLMQCPLCGHPK-THKHGKTSKGSQRYRCPHCQQTFS-Etf
DTLCYRRQISPETIQITILQAHVEGSSLRGLSRITGVAYNTCVSVVR"
/note="IS1_ORF1 e-value= 1.7e-15 fragment hit coverage=
36.40%, between model( 239 aa) positions 1; 87 length is
88aa with 2 gaps, 0 stops, absolute frame= Plus1"
CDS 1585042..1585257
/colour="255 0 0"
/evidence=predicted
/translation="REIHEAIGVSIRTIERVMRFVEEG---LEAAINQRsGAGRKRK
IQGEQEAHLIALRCSEPPVG----HARWTLRLLAD"
/note="IS630 e-value= 9.9e-08 fragment hit coverage=
20.74%, between model( 376 aa) positions 44; 121 length
is 72aa with 7 gaps, 0 stops, absolute frame= Plus1"
CDS 1602370..1602585
/colour="255 0 0"
/evidence=predicted
/translation="REIHEAIGVSIRTIERVMRFVEEG---LEAAINQRsGAGRKRK
IQGEQEAHLIALRCSEPPVG----HARWTLRLLAD"
/note="IS630 e-value= 9.9e-08 fragment hit coverage=
20.74%, between model( 376 aa) positions 44; 121 length
is 72aa with 7 gaps, 0 stops, absolute frame= Plus1"
CDS 2373475..2374293
/colour="255 0 0"
/evidence=predicted
/translation="-IEYPQFLQLLEQAEKHNERKaeiexhksRVNAK-GGGRKPLL
SVAEEVCLCLFYLRHYPTFEVLGLQFGVSKSEANDTVHYWLSMLRVLL-----PASLL
EQVDSNPsdyaIVqewltqfqlIVDTFEQARERPIdnDEQRSYFSGKKQOHTFKSQIV
TLPGGKDIVDAIAGkKGPTSDISVRFREHQSQFAPGQFGDGKAYVGAQNVO----TPH
KKPRGKELTPKQKAQNKKfsSTRRIFVEHTIRLVRIFRVAQERFRLRHDTYEQVILTV
CGLVRLRL"
/note="IS5_ISL2 e-value= 1.6e-11 complete sequence hit
coverage= 100%, between model( 260 aa) positions 1; 260
length is 273aa with 11 gaps, 0 stops, absolute frame=
Plus1"
CDS 2373877..2374236
/colour="255 0 0"
/evidence=predicted
/translation="QRSYFSGKKQOHTFKSQIVTLPGGKDIVDAIAGkKGPTSDISVF
REHQSQFAPGQFGDGKAYVGAQNVO----TPHKKPRGKELTPKQKAQNKKfsSTRRI
FVEHTIRLVRIFRVAQERFRLR"
/note="IS5_ISL2 e-value= 8.7e-11 fragment hit coverage=
46.92%, between model( 260 aa) positions 120; 241 length
is 120aa with 4 gaps, 0 stops, absolute frame= Plus1"
CDS 2559835..2560116
/colour="255 0 0"
/evidence=predicted
/translation="SMCEPYCQSEK-ILKRGFDSLqdgTLVQRYQCKDCNRRFN-ERT
GTPMARLRtasSVVSYAIKARTEGMGVRsAGRTFGKSHTTIMRWEKRLADQA"
/note="IS1_ORF1 e-value= 3.2e-11 fragment hit coverage=
37.24%, between model( 239 aa) positions 5; 93 length is
94aa with 2 gaps, 0 stops, absolute frame= Plus1"
CDS 2630473..2630631

```

```

/colour="255 0 0"
/evidence=predicted
/translation="HHPHPRVQRRMEVLYLKSQGLPHAQICQLCQISRPTLAKTLRLY
QGGIEGLK"
/note="IS481 e-value= 1.1e-08 fragment hit coverage=
15.10%, between model( 351 aa) positions 1; 53 length is
53aa with 0 gaps, 0 stops, absolute frame= Plus1"
CDS 2982304..2983041
/colour="255 0 0"
/evidence=predicted
/translation="-----TGVYKQTF-KRMLHAWHTYHLSHSNAERPPKLCRPDQLL
VALQYWREYRTYFHIAGDWDVSESTVCRIVQQVESALMNSGLFRLPGKKHLIQGFERP
DVVVMDVTETPIERPQKGQKAYYSGKKRDIPSNARLSLTVALXRLSALT-----
-LAKVVGMIFrssrfqvSTSIQIprVCKIADiKGLQPI-----TPIAM----FLSRSH
NTVNXLPSSESTTVLXVRNEWALNTLIAAXRFSEFCRSAIVIVVVVATRCGVTX"
/note="IS5_ISL2 e-value= 2.8e-20 complete sequence hit
coverage= 100%, between model( 260 aa) positions 1; 260
length is 246aa with 25 gaps, 5 stops, absolute frame=
Plus1"
CDS 2982364..2982675
/colour="255 0 0"
/evidence=predicted
/translation="SHSNAERPPKLCRPDQLLVALQYWREYRTYFHIAGDWDVSESTV
CRIVQQVESALMNSGLFRLPGKKHLIQGFERPQKGQKAYYSGK
KR"
/note="IS5_ISL2 e-value= 1.3e-41 fragment hit coverage=
40%, between model( 260 aa) positions 26; 129 length is
104aa with 0 gaps, 0 stops, absolute frame= Plus1"
CDS 3974686..3975072
/colour="255 0 0"
/evidence=predicted
/translation="YADESGMDHRDEYDY-AYGPKGE-----RVYA-LKTG-
RRSGRVNMIAALRAKQL--MAPFTIEGACNRTVFELwLERCLIPvIKPGQKLVII--DN
ATFHKGGQIQELVEKAG--CEVWYLPPYSPDLNKIERSWSWIKSRIR"
/note="IS630 e-value= 1.1e-13 fragment hit coverage=
38.83%, between model( 376 aa) positions 188; 333 length
is 129aa with 20 gaps, 0 stops, absolute frame= Plus1"
CDS 3975325..3976020
/colour="255 0 0"
/evidence=predicted
/translation="FKHLHLGMIIsDIKRKSLPAIARAVGLENHQSLHHLFSESPWVAS
hLSDkRLDIILKILDGRRLILLID-----ETGDCKKKGKSTDYVVKR
QYIGNVGKKENGIvAVTAYGLFQGMILPLSFEVYKPR-----ErLKEEDEYLSK
PQIAAGMIRQLQGMGFCFELVLADSLYGEAQTNFVNVLEELKLPYILAIRSNHAVWLP
AEQAVFAEPWQSFERTFSNGTTETRYrQEIIYGqrhhQKRY"
/note="IS4 e-value= 4.7e-14 fragment hit coverage=
51.23%, between model( 486 aa) positions 1; 249 length is
232aa with 27 gaps, 0 stops, absolute frame= Plus1"
CDS 3975325..3976452
/colour="255 0 0"
/evidence=predicted
/translation="FKHLHLGMIIsDIKRKSLPAIARAVGLENHQSLHHLFSESPWVAS
hLSDkRLDIILKILDGRRLILLID-----ETGDCKKKGKSTDYVVKR
QYIGNVGKKENGIvAVTAYGLFQGMILPLSFEVYKPR-----ErLKEEDEYLSK
PQIAAGMIRQLQGMGFCFELVLADSLYGEAQTNFVNVLEELKLPYILAIRSNHAVWLP
AEQAVFAEPWQSFERTFSNGT-----TETRYR
QEIIYGQRHHQKRYWLLTTDPQTLPENSTS-----YVMAA
APE----IKLDEIGDCYGFRTWIEYGLKQSKD-TLGWADFRMTHYEQIEKWEIVMSA
FLMVSLFADVFNDS-----CPVAHQHFAQHPwWDNQNG
WKNLLNNVR--LIIQPLIS----WNLLKRWLEVFPSRALKKGF"

```

```

/note="IS4 e-value= 9.9e-07 complete sequence hit
coverage= 100%, between model( 486 aa) positions 1; 486
length is 376aa with 117 gaps, 0 stops, absolute frame=
Plus1"
CDS 4217206..4217592
/colour="255 0 0"
/evidence=predicted
/translation="YADESGMDHRDEYDY-AYGPKGE-----RVYA-LKTG-
RRSGRVNMIAALRAKQL--MAPFTIEGACNRTVFELwLERCLIPvlKPGQKLVI--DN
ATFHKGQIQELVEKAG--CEVWYLPYPSPDLNKIERSWSWIKSRIR"
/note="IS630 e-value= 1.1e-13 fragment hit coverage=
38.83%, between model( 376 aa) positions 188; 333 length
is 129aa with 20 gaps, 0 stops, absolute frame= Plus1"
CDS 4225801..4226796
/colour="255 0 0"
/evidence=predicted
/translation="CIAVAAILRRTXTREVFHFSFCVMPKIYSydlRCKVIDAIeLDGM
RPSEASELFHIRRNTINQWQHLKAETG-----DLHPKP-VHCPDHSKIK-----
DWDKFRAFAYKHRHKTQAQMAQLWDGE----ISERTISRALQONIGFT-RKKTYGYR--
ERD--EHKR----AAFIKRLSTVDP-DDIVYADESGMDHRDEYDY-AYGPKGE-----
-----RVYA-LKSG-TRKGRVNMIAALRAKQL--MAPFTIEGACNRTVFEVwLERCL
IPMLKPGQKLVI--DNATFHKAGRIQELVEKAG--CEVWYLPYPSPDLNKIERSWSWI
K--SRIRHQLDHFGSLREAMEHVLHLTSXIEWRLLXNKLCNNLKRIIL"
/note="IS630 e-value= 1.2e-10 complete sequence hit
coverage= 100%, between model( 376 aa) positions 1; 376
length is 332aa with 50 gaps, 3 stops, absolute frame=
Plus1"
CDS 4226083..4226673
/colour="255 0 0"
/evidence=predicted
/translation="AFAYKHRHKTQAQMAQLWDGEISERTISRALQONIGFT-RKKTYG
YR--ERD--EHKR----AAFIKRLSTVDP-DDIVYADESGMDHRDEYDY-AYGPKGE-
-----RVYA-LKSG-TRKGRVNMIAALRAKQL--MAPFTIEGACNRTVFEVwL
ERCLIPMLKPGQKLVI--DNATFHKAGRIQELVEKAG--CEVWYLPYPSPDLNKIERS
WSWIKSRIR"
/note="IS630 e-value= 1.2e-14 fragment hit coverage=
59.57%, between model( 376 aa) positions 110; 333 length
is 197aa with 30 gaps, 0 stops, absolute frame= Plus1"
CDS 4227730..4228050
/colour="255 0 0"
/evidence=predicted
/translation="FPDAQQVHVVDNLNTHtpaalyKTFKPDEALRILS-RIQFHYT
PKHGSWLNMVFEFESALSROQLNRRIP-DIEKLRHEVTAWEQRRNWDKAMVNWLFTVD
DARTKLS"
/note="IS630 e-value= 3.3e-07 fragment hit coverage=
27.39%, between model( 376 aa) positions 274; 376 length
is 107aa with 2 gaps, 0 stops, absolute frame= Plus1"
CDS 5176546..5176935
/colour="255 0 0"
/evidence=predicted
/translation="FFMDESGFSLVPCIPY-GWQPIG-----TYL-EIPT
RSSKRLNVLGFLSRROGL--HAYTSEQTITSEVVShCIDTFFADV--ELPTVIVVDQA
PIHTSQsiyEMKAERWARG--ITLFELPSYSPHLNLIERLWQFMKYQWI"
/note="IS630 e-value= 6.5e-11 fragment hit coverage=
39.10%, between model( 376 aa) positions 187; 333 length
is 130aa with 21 gaps, 0 stops, absolute frame= Plus1"
CDS 5240533..5240919
/colour="255 0 0"
/evidence=predicted
/translation="YADESGMEHRDEYDY-AYGPKGE-----RAYA-LKSG-

```

RRSGRVNMIAALRAKQL--MAPFTIEGACNRTVFEIWLercLIPMLKPGQKLVI--DN  
ATFHKGGQIQELVEAAG--CEVWYLPPYSPDLNKIERSWSWIKSRIR"  
/note="IS630 e-value= 4e-14 fragment hit coverage=  
38.83%, between model( 376 aa) positions 188; 333 length  
is 129aa with 20 gaps, 0 stops, absolute frame= Plus1"  
CDS 5297623..5297775  
/colour="255 0 0"  
/evidence=predicted  
/translation="QLCLILDNNPTHKG-KMRSQLAIHLEqmgltqsiQVEFLYLPSY  
SPKLNLVE"  
/note="IS630 e-value= 4.3e-06 fragment hit coverage=  
11.70%, between model( 376 aa) positions 279; 322 length  
is 51aa with 1 gaps, 0 stops, absolute frame= Plus1"  
CDS 5359111..5359329  
/colour="255 0 0"  
/evidence=predicted  
/translation="RIRFVYIPKHTSWLNQIECWFSILVRRLLIRRGNFTSKDDLQORI  
LEFIEYFNHtMAKPFQWQFKGFQPRXLXLM"  
/note="IS630 e-value= 4e-10 fragment hit coverage=  
19.15%, between model( 376 aa) positions 305; 376 length  
is 73aa with 0 gaps, 1 stops, absolute frame= Plus1"  
CDS 5359159..5359269  
/colour="255 0 0"  
/evidence=predicted  
/translation="IECWFSILVRRLLIR--RGNFTSKDDLQORILEFIEYFNH"  
/note="IS3\_IS150\_ORF2 e-value= 2e-08 fragment hit  
coverage= 10.03%, between model( 389 aa) positions 329;  
367 length is 37aa with 2 gaps, 0 stops, absolute frame=  
Plus1"  
CDS 5666503..5666847  
/colour="255 0 0"  
/evidence=predicted  
/translation="CGNANIMXYLY-----RNIKGEYMVELGgfrRYF  
YELARHKESVIEEGHLPDHSVHKLLSIPPKYSVSNVVGIVKGVFISPEXA-----  
-----IVGMRQAI-----SFGLEDILC-QQSAKMRKXSVDISG"  
/note="IS605 e-value= 9.1e-06 complete sequence hit  
coverage= 100%, between model( 152 aa) positions 1; 152  
length is 115aa with 40 gaps, 3 stops, absolute frame=  
Plus1"  
CDS 5666590..5666721  
/colour="255 0 0"  
/evidence=predicted  
/translation="FYELARHKESVIEEGHLPDHSVHKLLSIPPKYSVSNVVGIVKGV  
"  
/note="IS200 e-value= 1.3e-14 fragment hit coverage=  
28.57%, between model( 154 aa) positions 41; 84 length is  
44aa with 0 gaps, 0 stops, absolute frame= Plus1"  
CDS 5666590..5666721  
/colour="255 0 0"  
/evidence=predicted  
/translation="FYELARHKESVIEEGHLPDHSVHKLLSIPPKYSVSNVVGIVKGV  
"  
/note="IS200\_IS605 e-value= 1.4e-14 fragment hit  
coverage= 28.76%, between model( 153 aa) positions 41; 84  
length is 44aa with 0 gaps, 0 stops, absolute frame=  
Plus1"  
CDS 5666629..5666721  
/colour="255 0 0"  
/evidence=predicted  
/translation="EGHLPDHSVHKLLSIPPKYSVSNVVGIVKGV"

/note="IS605 e-value= 2.2e-10 fragment hit coverage= 20.39%, between model( 152 aa) positions 54; 84 length is 31aa with 0 gaps, 0 stops, absolute frame= Plus1"  
 CDS 5747743..5747880  
 /colour="255 0 0"  
 /evidence=predicted  
 /translation="WQTDGWEGYARQLPDE---VVHEVSKALTQRLERTNGIVRQQTGRWHRR"

/note="IS1\_ORF2 e-value= 1.8e-11 fragment hit coverage= 20.68%, between model( 237 aa) positions 164; 212 length is 46aa with 3 gaps, 0 stops, absolute frame= Plus1"  
 CDS 5903662..5904156  
 /colour="255 0 0"  
 /evidence=predicted  
 /translation="LEKAGIESKKKTYGYR--ERD--ETQR---QEFIERLKTKHA--HQIVYVDEAGIDNRADYPY-GYGPIG-----QRFYD-LKSG-KRTERVVSFIALKEGQL--FSPMTFEGSCNWLLEAWLQSLIPQLQPGdIIVI-DNASFHHGLSIEEIVAEAG--CEIWYLPYSYSPDLNKIERWWFVLKN"

/note="IS630 e-value= 4e-13 fragment hit coverage= 50.80%, between model( 376 aa) positions 140; 330 length is 165aa with 28 gaps, 0 stops, absolute frame= Plus1"  
 CDS 6055453..6056127  
 /colour="255 0 0"  
 /evidence=predicted  
 /translation="SXGICMKCECGQH-IHKNGHRR-GKQNHICVTCGRQFL--STYSKRGYSDWTKRLCLRMVNGMGLKGIERVIGVAHTTVIHVVQVGVLLPDAYDPDD-----IP---QVGELDELETFVGKRNKVWIW-TVVDHFHPG--ILGWVVDHSAETFRPLWqaIVCWQCFWVSDGNPVYpgFIPEgDQIVSKTYMTRVEGENTRLRHYLARLHRKTLCSKSDMLKHSIRLL---IHYL"

/note="IS1\_ORF1 e-value= 5.8e-42 complete sequence hit coverage= 100%, between model( 239 aa) positions 1; 239 length is 225aa with 19 gaps, 1 stops, absolute frame= Plus1"  
 CDS 6055453..6056127  
 /colour="255 0 0"  
 /evidence=predicted  
 /translation="SXGICMKCECGQH-IHKNGHRR-GKQNHICVTCGRQFL--STYSKRGYSDWTKRLCLRMVNGMGLKGIERVIGVAHTTVIHVVQVGVLLPDAYDPDD-----IP---QVGELDELETFVGKRNKVWIW-TVVDHFHPG--ILGWVVDHSAETFRPLWqaIVCWQCFWVSDGNPVYpgFIPEgDQIVSKTYMTRVEGENTRLRHYLARLHRKTLCSKSDMLKHSIRLL---IHYL"

/note="IS1\_ORF1 e-value= 3.3e-41 complete sequence hit coverage= 100%, between model( 239 aa) positions 1; 239 length is 225aa with 19 gaps, 1 stops, absolute frame= Plus1"  
 CDS 6055453..6056133  
 /colour="255 0 0"  
 /evidence=predicted  
 /translation="SXGICMKCECGQH-IHKNGHRR-GKQNHICVTCGR---QFLSTYSKRGysdwTKRLCLRMVNGMGLKGIERVIGVAHTTVIHVVQV--GVLLPDAYDPDDIPQVGELDELETFVGKRNKVWIWTVVDHFHPGILGWVVDHSAETFRPLWQAIVCWQ-CFFWVSDGNPVYpgFIPEG----DQIVSKTYMTRVEGENTRLRHYLARLHRKTLCSKSDMLKHSIRLLI-HYLKF"

/note="IS1\_ORF2 e-value= 3.9e-29 complete sequence hit coverage= 100%, between model( 237 aa) positions 1; 237 length is 227aa with 14 gaps, 1 stops, absolute frame= Plus1"  
 CDS 6055732..6056133  
 /colour="255 0 0"  
 /evidence=predicted

```

/translacion="DPDDIPQVGELDELETFVGKKRNKVWIWTVVDHFHFGILGWVVG
DHAETFRPLWQAIVCWQ-CFFWVSDGNPVYPGFIPEG----DQIVSKTYMTRVEGEN
TRLRHYLARLHRKTLCSYKSVDMKHSIRLLI-HYLKF"
/note="IS1_ORF2 e-value= 8.3e-32 fragment hit coverage=
59.07%, between model( 237 aa) positions 98; 237 length
is 134aa with 6 gaps, 0 stops, absolute frame= Plus1"
CDS 6108877..6109140
/colour="255 0 0"
/evidence=predicted
/translacion="LFYFLMQCPLCGHPK-THKHGKTSKGSQRYRCPHCQQTFS-Etf
DTLCYRRQISPETIQITILQAHVEGSSLRGLSRITGVAYNTCVSVVR"
/note="IS1_ORF1 e-value= 1.7e-15 fragment hit coverage=
36.40%, between model( 239 aa) positions 1; 87 length is
88aa with 2 gaps, 0 stops, absolute frame= Plus1"
CDS 6307891..6308655
/colour="255 0 0"
/evidence=predicted
/translacion="SPYQHLSLYLKKLRLSHMLTHWESIESQA-MQENWSYAEFLAL
CETKAQRREQARLKRALTEARLPNA-KSFTNFDVSHCPQLNPAPLMQLAAdPGWLER
ENCLILGPSVGKTHLATGVSKKMLEFGKRVKFFAANALVQHLQQAQLQLQLH-PMLK
KLDYDILLVLDLGYCKKSEAETSVLFELIAHRYERKSLITANQPFQWDDIFT-DS
MMAVAIDRLIHHGLIIKIQADSYRRKSATQRTAQTQSPPO"
/note="IS21_ORF2 e-value= 7.2e-80 complete sequence hit
coverage= 100%, between model( 258 aa) positions 1; 258
length is 255aa with 4 gaps, 0 stops, absolute frame=
Plus1"
CDS 6307891..6308655
/colour="255 0 0"
/evidence=predicted
/translacion="SPYQHLSLYLKKLRLSHMLTHWESIESQA-MQENWSYAEFLAL
CETKAQRREQARLKRALTEARLPNA-KSFTNFDVSHCPQLNPAPLMQLAAdPGWLER
ENCLILGPSVGKTHLATGVSKKMLEFGKRVKFFAANALVQHLQQAQLQLQLH-PMLK
KLDYDILLVLDLGYCKKSEAETSVLFELIAHRYERKSLITANQPFQWDDIFT-DS
MMAVAIDRLIHHGLIIKIQADSYRRKSATQRTAQTQSPPO"
/note="IS21_ORF2 e-value= 1.9e-80 complete sequence hit
coverage= 100%, between model( 258 aa) positions 1; 258
length is 255aa with 4 gaps, 0 stops, absolute frame=
Plus1"
CDS 6335869..6336906
/colour="255 0 0"
/evidence=predicted
/translacion="PMIKIDFTAEEIQQLNYERYHHPHPRVQRRMEVLYLKSQGLSHT
QICQLCQISRPTLAKTLRQYQGG---IEGLKTLEYKQGPSLLNAHS-DSVRAYFEQH
PP-----RTSAEAQAVIEQLTGIKRSPTQIKAFKLRIGCRYRKGYPGKSSLP
-EKIEEQEQFRHTRLEPLLeeAQQRERLVFFVDAAHFVHRAYLGF-VWCITRI-----
-----FIPSPS-GRQRFNVLGALDAITKDLVSVTNHTYINSHSMCLLLAKLALL
DPV-IPISVILDNARYQKQLVTDFAEIVD--IELVYLPYSYSPHLNLIERLWRFVVRKE
CLYSKYADFPFAFKGAIQOCIDQCNGEHKAKLT'TLLSLKFQSFKK"
/note="IS630 e-value= 4.9e-24 complete sequence hit
coverage= 100%, between model( 376 aa) positions 1; 376
length is 346aa with 33 gaps, 0 stops, absolute frame=
Plus1"
CDS 6335869..6336906
/colour="255 0 0"
/evidence=predicted
/translacion="PMIKIDFTAEEIQQLNYERYHHPHPRVQRRMEVLYLKSQGLSHT
QICQLCQISRPTLAKTLRQYQGG---IEGLKTLEYKQGPSLLNAHS-DSVRAYFEQH
PP-----RTSAEAQAVIEQLTGIKRSPTQIKAFKLRIGCRYRKGYPGKSSLP
-EKIEEQEQFRHTRLEPLLeeAQQRERLVFFVDAAHFVHRAYLGF-VWCITRI-----
-----FIPSPS-GRQRFNVLGALDAITKDLVSVTNHTYINSHSMCLLLAKLALL

```

DPV-IPISVILDNARYQKCQLVTDFAEIVD--IELVYLPSYSPHLNLIERLWRFVVRKE  
CLYSKYYADFPFAFKGAIQQCIDQCNGEHKAKLTTLLSLKFQSFKK"  
/note="IS630 e-value= 6.7e-25 complete sequence hit  
coverage= 100%, between model( 376 aa) positions 1; 376  
length is 346aa with 33 gaps, 0 stops, absolute frame=  
Plus1"

CDS 6335929..6336087  
/colour="255 0 0"  
/evidence=predicted  
/translation="HHPHPRVQRRMEVLYLKSQGLSHTQICQLCQISRPTLAKTLRQY  
QQGGIEGLK"  
/note="IS481 e-value= 3.7e-09 fragment hit coverage=  
15.10%, between model( 351 aa) positions 1; 53 length is  
53aa with 0 gaps, 0 stops, absolute frame= Plus1"

CDS 6483169..6483501  
/colour="255 0 0"  
/evidence=predicted  
/translation="QRVKDRAAMIRLSHQGMYVEKIAALFQCNVRTARQTFHRWQQKG  
---LGGLWDAPHPGAQRRWHPED-IEYLETCLRQEERTY-----NSQQLSRKLAKE  
RNVHLSADRIRQILKRGXS"  
/note="IS630 e-value= 6e-07 fragment hit coverage=  
32.45%, between model( 376 aa) positions 25; 146 length  
is 111aa with 11 gaps, 1 stops, absolute frame= Plus1"

CDS 59159..60220  
/colour="255 0 0"  
/evidence=predicted  
/translation="IVKRXKN-----EQCIVSHpYPALXPPQPLAQG---ISSA---  
--RQXHFSESEQRQRXSENCVSRASSRPIDAAIRDRKKSlnVLTp--NQRQMVRL  
QQDYSIRQICQVLNYPVSQVYYHARGQP-----DESELKAAIAGVAGAYP-TYGYRRI  
TAQLQ---RQGYCVNHKRVARLMRQIGIMAKTKVK-RKRTTSEHSfprYGNRVLNLS  
--IDHPEQVWVADITYIRLQ-QEFVYLAVVMDVFTRAIRGWHLsrHIDQQLTLRALNK  
ALERAT---PEIHHS-----DQGVQYAAAAYMQLLQHQVQISMAEVGQAWQNGYAER  
LMRTIKEEEVD--LSDYRNFTeAYEHIEQFLEDvYMHKRIHSSSLGylTPCEYEQQWRQ  
Q"  
/note="IS3\_IS150\_ORF2 e-value= 1.7e-22 complete sequence  
hit coverage= 100%, between model( 389 aa) positions 1;  
389 length is 354aa with 39 gaps, 5 stops, absolute  
frame= Plus2"

CDS 59198..60244  
/colour="255 0 0"  
/evidence=predicted  
/translation="HPYPALXPPQ--PLAQGI--SSARQXHFSESEQRQRXSENCV  
RASSRPIDAAiRDRKKSlnVLTpNQRQMVRLQODY--SIRQICQVLNYPVSQVYYH  
ARGQPDESELKAAIAGVAGAYPTYGYRRI TAQLQRQGYCVNHKRVARLMRQIGIMAKT  
KV-KRKRtTsehsfprYGNRVLNLSIDHPEQVWVADITYIRLQ--QEFVYLAVVMDV  
FTRAIRGWHLsrHIDQQLTLRALNKALE-RATPEIHHS DQGVQYAAAAYMQLLQHQV  
QISMAEVGQAWQNGYAERLMRTIKEEEVDLSDYRNFTeAYEHIEQFLEDvYMHKRIHS  
SLGylTPCEYEQQWRQNNHYCMNK"  
/note="IS3\_IS407\_ORF2 e-value= 6.3e-13 complete sequence  
hit coverage= 100%, between model( 344 aa) positions 1;  
344 length is 349aa with 10 gaps, 4 stops, absolute  
frame= Plus2"

CDS 59333..60217  
/colour="255 0 0"  
/evidence=predicted  
/translation="PIDAAIRDRKKSlnVLTpNQRQMVRLQODY SIRSIRQICQVLNYP  
RSQVYYHARGQPDESELKAAIAGV-AGAYPTYGYRRI TAQLQRQGYCVNHKRVARLMR  
QIGIMAKTKVK----RKRTTSEHSF-PRYGNRvlnLSIDHPEQVWVADITYIRL--Q  
QEFVYLAVVMDVFTRAIRGWHLsrHIDQQLTLRALNKALER----ATPEIHHS DQGVQ  
YAAAAYMQLLQHQVQISMAEVGQAWQNGYAERLMRTIKEEEVDLSDYRNFT--EAYE

HIEQFLEDVYMHKRIHSSLGYLTPCEYEQQWRQ"  
 /note="IS3\_IS150\_ORF1 e-value= 4.3e-49 complete sequence  
 hit coverage= 100%, between model( 306 aa) positions 1;  
 306 length is 295aa with 14 gaps, 0 stops, absolute  
 frame= Plus2"  
 CDS 59369..60253  
 /colour="255 0 0"  
 /evidence=predicted  
 /translation="LNVLTPNQKRMVRQLQOD-YSIRQICQVLNYPQRSQVYYHARGQ  
 PD-----ESELKAAIAGVAGAYPTYGYRRITAOQLQRQGYC---  
 VNHKRVARLMRQIGIMAKTKVKRKR-TTNSEHSFPRYGnRVLNLSIDHPEQVWVADIT  
 YI-----RLOQ-----EFVYLAVVMDVFTRAIRGWHLRSR-----IDQ  
 QLTLRALNKALERAT-PEIHSDQGVQYAAA----AYMQLLQHQVQISMAEVGQAWQ  
 NGYAERLMRTIKEEEVDLSD---YRNFTEAYEHIEQFLEDvYMHKRIHSSLGYLTPCE  
 YEQQWRQONNHCMNKEDS"  
 /note="IS481 e-value= 2.9e-08 complete sequence hit  
 coverage= 100%, between model( 351 aa) positions 1; 351  
 length is 295aa with 58 gaps, 0 stops, absolute frame=  
 Plus2"  
 CDS 59369..60253  
 /colour="255 0 0"  
 /evidence=predicted  
 /translation="LNVLTPNQK-RQMVRLQqdYSIRQICQVLNYP---RSQVYYHA  
 RgQPDESELKA--AIAGV-----AGA---YPTYGYRRITAOQLQRQGYCVNHKRVAR  
 LMRQIGIMAKTKVKRKRRTTNSEHSFPRYGNRVL-NLSIDHPEQVWVADITYIRLQOEF  
 VYLAVVMDVFTRAIRGWHLRSRHIDQQLTLRALNKALERATPE-----IHSDQGV  
 QYAAAAYMQLLQHQVQISMAEVGQAWQNGYAERLMRTIKEEEVDLSDYrnFTEAYEH  
 IEQFLEDV--YMHKRIHSSLGYLTPCEYEQQWRQONNHCMNKEDS"  
 /note="IS3\_IS51\_ORF2 e-value= 1.6e-26 complete sequence  
 hit coverage= 100%, between model( 317 aa) positions 1;  
 317 length is 295aa with 27 gaps, 0 stops, absolute  
 frame= Plus2"  
 CDS 59375..59629  
 /colour="255 0 0"  
 /evidence=predicted  
 /translation="VLTPNQKRMVRQLQODY--SIRQICQVLNYPQRSQVYYHARGQP  
 DESELKAAIAGVAGAYPTYGYRRITAOQLQRQGYCVNHKRVARL"  
 /note="IS3\_IS407\_ORF2 e-value= 1.2e-17 fragment hit  
 coverage= 25.29%, between model( 344 aa) positions 60;  
 146 length is 85aa with 2 gaps, 0 stops, absolute frame=  
 Plus2"  
 CDS 59378..60229  
 /colour="255 0 0"  
 /evidence=predicted  
 /translation="LTPNQKRMVRQL-QQDYSIRQICQVLNYPQRSQVYYHARG-----  
 -----QPDESELKAAIAGVAGAYPTYGYRRITAOQLQRQGY-----CVNHKRVARLM  
 RQIGIM--AKTKVKRKR-RttsehsfprYGNRVLnlsIDHPEQVWVAD-ITYIRLQOE  
 FVYLAVVMDVFTRAIRGWH-----LSRHIDQQLTLRALNK---ALERATPEIHHS-SD  
 QGVQYAAAAYMQLLQHQVQISMAEVGQAWQNGYAERLMRTIKEEEVDLSDYRNFTEA  
 YEHEQFLEDvYMHKRIHSSLGYLTPCEYEQQWRQONNH"  
 /note="IS3\_IS2\_ORF2 e-value= 2.2e-08 complete sequence  
 hit coverage= 100%, between model( 302 aa) positions 1;  
 302 length is 284aa with 31 gaps, 0 stops, absolute  
 frame= Plus2"  
 CDS 59393..60220  
 /colour="255 0 0"  
 /evidence=predicted  
 /translation="KRMVRQLQODYSIRQICQVLNYPQRSQVYYHARGQP-----DES  
 ELKAAIAGVAGAYP-TYGYRRITAOQLQ---RQGYCVNHKRVARLMRQIGIMAKTKVK-  
 RKRTTNSEHSfprYGNRVLNLS--IDHPEQVWVADITYIRLQ-QEFVYLAVVMDVFTR



AIRGWHLSRHIDQQLTLRALNKALERAT---PEIHHS-----DQGVQYAAAAYMQLLO  
QHQVQISMAEVBQAWQNGYAERLMRTIKEEEVD--LSDYRNFTTEAYEHIEQFLEDVYM  
HKRIHSSLGYLTPCEYEQQWRQQ"  
/note="IS3\_IS150\_ORF2 e-value= 2.2e-47 fragment hit  
coverage= 76.09%, between model( 389 aa) positions 94;  
389 length is 276aa with 23 gaps, 0 stops, absolute  
frame= Plus2"  
CDS 59396..60244  
/colour="255 0 0"  
/evidence=predicted  
/translation="RQMVRLQDDYSIRQICQVLNYPRSQVYYHA-----RG  
QPDEsELKAAIAGV-AGAYPTYGYRRITAQLQRQGYCVNHKRVARLMRQIGIMAKTKV  
KRKRRTTNSHFSFPRYGNRVL-NLSIDHPEQVWVADITYIRLQQEFVYLAVVMDVFTRA  
IRGWHLSRHIDQQLT-LRALNKALERATPE-----IHHS DQGVQYAAAAYMQLLOQ  
HQVQISMAEVBQAWQNGYAERLMRTIKEEEVDL---S-DYRNFTTEAYEHIEQFLEDVY  
MHKRIHSSLGYLTPCEYEQQWRQQNNHYCMNK"  
/note="IS3\_IS51\_ORF1 e-value= 8.1e-53 complete sequence  
hit coverage= 100%, between model( 307 aa) positions 1;  
307 length is 283aa with 25 gaps, 0 stops, absolute  
frame= Plus2"  
CDS 59396..60244  
/colour="255 0 0"  
/evidence=predicted  
/translation="RQMVRLQDDYSIRQICQVLNYPRSQVYYHA-----RG  
QPDEsELKAAIAGV-AGAYPTYGYRRITAQLQRQGYCVNHKRVARLMRQIGIMAKTKV  
KRKRRTTNSHFSFPRYGNRVL-NLSIDHPEQVWVADITYIRLQQEFVYLAVVMDVFTRA  
IRGWHLSRHIDQQLT-LRALNKALERATPE-----IHHS DQGVQYAAAAYMQLLOQ  
HQVQISMAEVBQAWQNGYAERLMRTIKEEEVDL---S-DYRNFTTEAYEHIEQFLEDVY  
MHKRIHSSLGYLTPCEYEQQWRQQNNHYCMNK"  
/note="IS3\_IS51\_ORF1 e-value= 6.3e-51 complete sequence  
hit coverage= 100%, between model( 307 aa) positions 1;  
307 length is 283aa with 25 gaps, 0 stops, absolute  
frame= Plus2"  
CDS 59399..60214  
/colour="255 0 0"  
/evidence=predicted  
/translation="QMVRLQDDYSIRQICQVLNYPRSQVYYHARG--QPD-----ES  
ELKAAI-AGVAGAYPTYGYRRITAQLQ-RQGYCVNHKRVARLMRQIGIMAKTKVKKR  
TTNSHFSFPRYGNRVLNLS-IDHPEQVWVADITYIRLQQEFVYLAVVMDVFTRAIRGW  
HLSRHIDQQLTLRALNKALERA-TPE--IHHS DQGVQYAAAAYMQLLOQHQVQISMAE  
VGQAWQNGYAERLMRTIK-EEVDL-SDYRNFTTEAYEHIEQFLEDVYMHKRIHSSLGY  
LTPCEYEQQWR"  
/note="IS3\_IS3\_ORF1 e-value= 9.5e-54 complete sequence  
hit coverage= 100%, between model( 286 aa) positions 1;  
286 length is 272aa with 15 gaps, 0 stops, absolute  
frame= Plus2"  
CDS 59399..60214  
/colour="255 0 0"  
/evidence=predicted  
/translation="QMVRLQDDYSIRQICQVLNYPRSQVYYHARG--QPD-----ES  
ELKAAI-AGVAGAYPTYGYRRITAQLQ-RQGYCVNHKRVARLMRQIGIMAKTKVKKR  
TTNSHFSFPRYGNRVLNLS-IDHPEQVWVADITYIRLQQEFVYLAVVMDVFTRAIRGW  
HLSRHIDQQLTLRALNKALERA-TPE--IHHS DQGVQYAAAAYMQLLOQHQVQISMAE  
VGQAWQNGYAERLMRTIK-EEVDL-SDYRNFTTEAYEHIEQFLEDVYMHKRIHSSLGY  
LTPCEYEQQWR"  
/note="IS3\_IS3\_ORF1 e-value= 2.5e-54 complete sequence  
hit coverage= 100%, between model( 286 aa) positions 1;  
286 length is 272aa with 15 gaps, 0 stops, absolute  
frame= Plus2"  
CDS 59402..60217

```

/colour="255 0 0"
/evidence=predicted
/translation="MVRQLQDDYSIRQICQVLNYPVRSQVYYHARGQPDESELKAAIAG
V-AGAYPTYGYRRITAQLQRQGYCVNHKRVARLMRQIGIMAKTKVK----RKRTTNSE
HSF-PRYGNRvLNLSIDHPEQVWVADITYIRL--QOEFVYLAVVMDVFTRAIRGWHL
RHIDQQLTLRALNKALER----ATPEIHHSQDQGVQYAAAAAYMQLLQHQVQVQISM
AEVQAWQNGYAERLMRTIKEEEVDLSDYRNFT--EAYEHIEQFLEDVYMHKRIHSSLG
PCEYEQQWRQ"
/note="IS3_IS150_ORF1 e-value= 6.3e-50 fragment hit
coverage= 92.81%, between model( 306 aa) positions 23;
306 length is 272aa with 14 gaps, 0 stops, absolute
frame= Plus2"
CDS 59411..60226
/colour="255 0 0"
/evidence=predicted
/translation="QLQDDYSIRQICQVLNYPVRSQVYYHARGQPDE-----SEL
KAAIAGVAGayPTYGYRRITAQLQRQGYCVNHKRVARLMRQIGIMAKTKVKRRTTNS
EHSFPRY---GNRVLNLSIDHPEQVWVADITYIRLQOEFVYLAVVMDVFTRAIRGWHL
SRHIDQQLTLRALNKALER----ATPE---IHHSQDQGVQYAAAAAYMQLLQHQVQVQISM
AEVQAWQNGYAERLMRTIKEEEVDLSDYRNFTTEAYEHIEQFLEDVYMHKRIHSSLG
LTPCEYEQQWRQNN"
/note="IS3_IS3_ORF2 e-value= 1.2e-64 complete sequence
hit coverage= 100%, between model( 288 aa) positions 1;
288 length is 272aa with 19 gaps, 0 stops, absolute
frame= Plus2"
CDS 59411..60226
/colour="255 0 0"
/evidence=predicted
/translation="QLQDDYSIRQICQVLNYPVRSQVYYHARGQPDE-----SEL
KAAIAGVAGayPTYGYRRITAQLQRQGYCVNHKRVARLMRQIGIMAKTKVKRRTTNS
EHSFPRY---GNRVLNLSIDHPEQVWVADITYIRLQOEFVYLAVVMDVFTRAIRGWHL
SRHIDQQLTLRALNKALER----ATPE---IHHSQDQGVQYAAAAAYMQLLQHQVQVQISM
AEVQAWQNGYAERLMRTIKEEEVDLSDYRNFTTEAYEHIEQFLEDVYMHKRIHSSLG
LTPCEYEQQWRQNN"
/note="IS3_IS3_ORF2 e-value= 3.3e-65 complete sequence
hit coverage= 100%, between model( 288 aa) positions 1;
288 length is 272aa with 19 gaps, 0 stops, absolute
frame= Plus2"
CDS 59480..59638
/colour="255 0 0"
/evidence=predicted
/translation="YHARGQPDESELKAAIAGVAGAYPTYGYRRITAQLQRQGY----
-CVNHKRVARLMRQ"
/note="IS3_IS2_ORF2 e-value= 9.1e-09 fragment hit
coverage= 18.87%, between model( 302 aa) positions 48;
104 length is 53aa with 5 gaps, 0 stops, absolute frame=
Plus2"
CDS 59546..60229
/colour="255 0 0"
/evidence=predicted
/translation="YPTYGYRRITAQLQRQGYCVNHKRVARLMRQIGIMAKTKVKRKR
TTNSEHSFPRYGNRVL-NLSIDHPEQVWVADITYIRLQOEFVYLAVVMDVFTRAIRGW
HLSRHIDQQLTLRALNKALERATPE-----IHHSQDQGVQYAAAAAYMQLLQHQVQVQ
ISM
AEVQAWQNGYAERLMRTIKEEEVDLSDYrnFTEAYEHIEQFLEDV--YMHKRIH
SSLG
YLTTPCEYEQQWRQNNH"
/note="IS3_IS51_ORF2 e-value= 1.9e-38 fragment hit
coverage= 74.76%, between model( 317 aa) positions 73;
309 length is 228aa with 11 gaps, 0 stops, absolute
frame= Plus2"
CDS 86624..87475

```

```

/colour="255 0 0"
/evidence=predicted
/translation="TQTLDRTXRAM-----PTAYDSDLTTLOWELLEPLIPAAK----
---PGGRPRTDMLSVLNAIFYLVVTCQWRQLPHDFPCWSTVYSYFRRWRDDGTWVH
INEHLRMQERVSEDRHSPSPAICDAQSVKVG NPRCH-SIGFDGGKMKVGRKRHVLD
TLGLVLMVMVTAANISDQR-GAKILFWKARRQGaslSRLVRIWADAGYQGQALMKWVM
DRFQYVLEVVKRSDNLAGFQVVS KRWIVERTFGWLLWSRRLNKDYEVLTRTAEALAYV
AMIRLMVRRLAQEHNFSNLS"
/note="IS5_IS1031 e-value= 1.9e-108 complete sequence hit
coverage= 100%, between model( 295 aa) positions 1; 295
length is 284aa with 14 gaps, 2 stops, absolute frame=
Plus2"
CDS 86666..87475
/colour="255 0 0"
/evidence=predicted
/translation="YDSDLTTLOWELLEPLIPAAK-----PGGRPRTDMLSVLNA
IFYLVVTCQWRQLPHDFPCWSTVYSYFRRWRDDGTWVHINEHLRMQERVSEDRHSP
SAAICDAQSVKVG NPRCH-SIGFDGGKMKVGRKRHVLDTLGLVLMVMVTAANISDQR
-GAKILFWKARRQGaslSRLVRIWADAGYQGQALMKWVM DRFQYVLEVVKRSDNLAGF
QVVS KRWIVERTFGWLLWSRRLNKDYEVLTRTAEALAYVAMIRLMVRRLAQEHNFSN
SLS"
/note="IS5_IS1031 e-value= 1.3e-110 fragment hit
coverage= 93.56%, between model( 295 aa) positions 20;
295 length is 270aa with 9 gaps, 1 stops, absolute frame=
Plus2"
CDS 86675..86914
/colour="255 0 0"
/evidence=predicted
/translation="DLTTLOWELLEPLIPAAKP-GGRPRT-TDMLSVLNAIFYLVVTC
QWRQLPHDFPCWSTVYSYFRRWRDDGTWVHINEHLRM"
/note="IS5_IS427 e-value= 3.3e-18 fragment hit coverage=
27.70%, between model( 296 aa) positions 125; 206 length
is 80aa with 2 gaps, 0 stops, absolute frame= Plus2"
CDS 104411..105622
/colour="255 0 0"
/evidence=predicted
/translation="DELIGENPQPEdiLGESGLLKRLSKRLVERALAGELTHHLQOSS
NDQS-GDeNSNGPRNSRNGYSKKT VQSEQG-EMDLSIPRDRCG-EFEPVLV PKGQORRI
A-GLDEKI IALYARGMTTRDIRAQLVELYG--ANISEALISDVTNSVMEEVKDWR SRP
LDEV--YPIVYLDALYVNIKVNGQVSKRAVYVALAVTVEGNKELLGLWIGAAerEGAK
FWLSVLTDLKNRGTQDILIAACCDGLKGFPQAIESVYPQTQVQVCIVHLIRNSLRHVPW
KESRAVAADLKPIYQAATLE-ESEAALDAFAH-KWDETYPGISQIWIRHWDNVAPL FQ
YPMAIRKVIYTTNAIESLNRSLRKVIKTKAVFPNEESVYKLMFLAMRNISKR-WTRPI
LNWKAALSHFAILFPTRFNXYIH"
/note="IS256 e-value= 1.4e-166 complete sequence hit
coverage= 100%, between model( 410 aa) positions 1; 410
length is 404aa with 11 gaps, 1 stops, absolute frame=
Plus2"
CDS 104411..105622
/colour="255 0 0"
/evidence=predicted
/translation="DELIGENPQPEdiLGESGLLKRLSKRLVERALAGELTHHLQOSS
NDQS-GDeNSNGPRNSRNGYSKKT VQSEQG-EMDLSIPRDRCG-EFEPVLV PKGQORRI
A-GLDEKI IALYARGMTTRDIRAQLVELYG--ANISEALISDVTNSVMEEVKDWR SRP
LDEV--YPIVYLDALYVNIKVNGQVSKRAVYVALAVTVEGNKELLGLWIGAAerEGAK
FWLSVLTDLKNRGTQDILIAACCDGLKGFPQAIESVYPQTQVQVCIVHLIRNSLRHVPW
KESRAVAADLKPIYQAATLE-ESEAALDAFAH-KWDETYPGISQIWIRHWDNVAPL FQ
YPMAIRKVIYTTNAIESLNRSLRKVIKTKAVFPNEESVYKLMFLAMRNISKR-WTRPI
LNWKAALSHFAILFPTRFNXYIH"
/note="IS256 e-value= 3.7e-167 complete sequence hit

```

coverage= 100%, between model( 410 aa) positions 1; 410 length is 404aa with 11 gaps, 1 stops, absolute frame= Plus2"

CDS 159026..160063  
/colour="255 0 0"  
/evidence=predicted  
/translation="PMIKIDFTAEEIQQLNYERYHHPHPRVQRRMEVLYLKSQGLSHT QICQLCQISRPTLAKTLRQYQGG---IEGLKTLEYKQGQPSLLNAHS-DSVRAYFEQH PP-----RTSAEAQAVIEQLTGIKRSPTQIKAFKLRIGCRYRKVGYVPGKSSLP -EKIEEQEQFRHTRLEPLleeAQRQERLVFFVDAAHFVHRAYLGF-VWCITRI----- FIPSPS-GRQRFNVLGALDAITKDLVSVTNHTYINSHSMCLLLAKLALL DPV-IPISVILDNARYQKCQLVTDFAEIVD--IELVYLPSYSPHLNLIERLWRFVVRKE CLYSKYADFPFAFKGAIQQCIDQCNGEHKAKLTLLSLKFQSFKK"  
/note="IS630 e-value= 6.7e-25 complete sequence hit coverage= 100%, between model( 376 aa) positions 1; 376 length is 346aa with 33 gaps, 0 stops, absolute frame= Plus2"

CDS 159026..160063  
/colour="255 0 0"  
/evidence=predicted  
/translation="PMIKIDFTAEEIQQLNYERYHHPHPRVQRRMEVLYLKSQGLSHT QICQLCQISRPTLAKTLRQYQGG---IEGLKTLEYKQGQPSLLNAHS-DSVRAYFEQH PP-----RTSAEAQAVIEQLTGIKRSPTQIKAFKLRIGCRYRKVGYVPGKSSLP -EKIEEQEQFRHTRLEPLleeAQRQERLVFFVDAAHFVHRAYLGF-VWCITRI----- FIPSPS-GRQRFNVLGALDAITKDLVSVTNHTYINSHSMCLLLAKLALL DPV-IPISVILDNARYQKCQLVTDFAEIVD--IELVYLPSYSPHLNLIERLWRFVVRKE CLYSKYADFPFAFKGAIQQCIDQCNGEHKAKLTLLSLKFQSFKK"  
/note="IS630 e-value= 4.9e-24 complete sequence hit coverage= 100%, between model( 376 aa) positions 1; 376 length is 346aa with 33 gaps, 0 stops, absolute frame= Plus2"

CDS 159086..159244  
/colour="255 0 0"  
/evidence=predicted  
/translation="HHPHPRVQRRMEVLYLKSQGLSHTQICQLCQISRPTLAKTLRQY QGGIEGLK"  
/note="IS481 e-value= 3.7e-09 fragment hit coverage= 15.10%, between model( 351 aa) positions 1; 53 length is 53aa with 0 gaps, 0 stops, absolute frame= Plus2"

CDS 249134..249991  
/colour="255 0 0"  
/evidence=predicted  
/translation="CRISDRNLRAM-----STAYDSDLTAEQWELLEPLIPAAK---- ---PGRPRTDMLSVVNAIFYLVTGQWRQLPHDFHCWSTVYSYFRKWRDDGTWRQ INEHLRMQVRVSEDRHPSPSAAICDAQSVKVG NPRCQ-SIGFDGGKLIKGRKRHVLDV TLGLILMVVVTAANISDQR-GAKILFWKARRQGAslgRLVRIWADAGYQGEALMQWVM DRFRYILEVIKRSNDLAGFKVVPKRWIVERTFGWLLWSRRLNKDYEVLTRTAEALVYV AMIRLMVRRLAQEyxTFQTASKMW"  
/note="IS5\_IS1031 e-value= 6.8e-110 complete sequence hit coverage= 100%, between model( 295 aa) positions 1; 295 length is 286aa with 14 gaps, 0 stops, absolute frame= Plus2"

CDS 249164..249424  
/colour="255 0 0"  
/evidence=predicted  
/translation="MSTAYDSDLTAEQWELLEPLIPAAKP-GGRPRT-TDMLSVVNAI FYLVVTGQWRQLPHDFHCWSTVYSYFRKWRDDGTWRQINEHLRM"  
/note="IS5\_IS427 e-value= 1e-22 fragment hit coverage= 30.07%, between model( 296 aa) positions 118; 206 length is 87aa with 2 gaps, 0 stops, absolute frame= Plus2"

CDS 249176..249991  
/colour="255 0 0"  
/evidence=predicted  
/translation="YSDLTAEQWELLEPLIPAAK-----PGGRPRTDMLSVVNA  
IFYLVVTCQWRQLPHDFHCWSTVYSYFRKWRDDGTWRQINEHLRMQVRVSEDRHPS  
SAAICDAQSVKVG NPRCQ-SIGFDGGKLIKGRKRHVLDVTLGLILMVVTAANISDQR  
-GAKILFWKARRQGAslgRLVRIWADAGYQGEALMQVMDRFRYILEVIKRSDNLAGF  
KVPKRWIVERTFGWLLWSRRLNKDYEVLT RTAEALVYVAMIRLMVRRLAQEy xTFQT  
ASKMW"  
/note="IS5\_IS1031 e-value= 1.4e-111 fragment hit  
coverage= 93.56%, between model( 295 aa) positions 20;  
295 length is 272aa with 9 gaps, 0 stops, absolute frame=  
Plus2"

CDS 440219..441070  
/colour="255 0 0"  
/evidence=predicted  
/translation="TQTLDRTXRAM-----PTAYDSDLTTLOWELLEPLIPAAK----  
---PGGRPRTDMLSVLNAIFYLVVTCQWRQLPHDFPCWSTVYSYFRRWRDDGTWSQ  
INEHLRMQVRVSEDRHPS SAAICDAQSVKVG NPRCH-LIGFDGGKMKVGRKRHVLD  
TLGLVLMVMVTAANISDQR-GAKILFWKARRQGAslSRLVRIWADAGYQGOALMKWVM  
DRSQYVLEVIKRSDNLAGFQVSKRWIVERTFGWLLWSRRLNKDYEVLT RTAEALVYV  
AMIRLMVRRLAQEHXNFSNLS"  
/note="IS5\_IS1031 e-value= 2.3e-109 complete sequence hit  
coverage= 100%, between model( 295 aa) positions 1; 295  
length is 284aa with 14 gaps, 2 stops, absolute frame=  
Plus2"

CDS 440261..441070  
/colour="255 0 0"  
/evidence=predicted  
/translation="YSDLTTLOWELLEPLIPAAK-----PGGRPRTDMLSVLNA  
IFYLVVTCQWRQLPHDFPCWSTVYSYFRRWRDDGTWSQINEHLRMQVRVSEDRHPS  
SAAICDAQSVKVG NPRCH-LIGFDGGKMKVGRKRHVLDVTLGLVLMVMVTAANISDQR  
-GAKILFWKARRQGAslSRLVRIWADAGYQGOALMKWVMDRSQYVLEVIKRSDNLAGF  
QVSKRWIVERTFGWLLWSRRLNKDYEVLT RTAEALVYVAMIRLMVRRLAQEHXNFSN  
SLS"  
/note="IS5\_IS1031 e-value= 1.5e-111 fragment hit  
coverage= 93.56%, between model( 295 aa) positions 20;  
295 length is 270aa with 9 gaps, 1 stops, absolute frame=  
Plus2"

CDS 440270..440509  
/colour="255 0 0"  
/evidence=predicted  
/translation="DLTTLOWELLEPLIPAAKP-GGRPRT-TDMLSVLNAIFYLVVTC  
CQWRQLPHDFPCWSTVYSYFRRWRDDGTWSQINEHLRM"  
/note="IS5\_IS427 e-value= 2e-19 fragment hit coverage=  
27.70%, between model( 296 aa) positions 125; 206 length  
is 80aa with 2 gaps, 0 stops, absolute frame= Plus2"

CDS 720377..721051  
/colour="255 0 0"  
/evidence=predicted  
/translation="SXGICMKCECGGQH-IHKNGHRR-GKQNHICVTCGRQFL--ST  
YSKRGYSDWTKRLCLRMVNGMGLKGIERVIGVAHTTVIHVVQVGVLLPDAYDPDD-  
-----IP---QVGELDELETFVGKRNKVWIW-TVVDHFHPG--ILGWVGNHSAETF  
RPLWq aIVCWQCFFWVSDGNPVYp gFIPEgDQIVSKTYMTRVEGENTRLRHYLARLHR  
KTLCSYKSV DMLKHSIRLL---IHYL"  
/note="IS1\_ORF1 e-value= 4e-41 complete sequence hit  
coverage= 100%, between model( 239 aa) positions 1; 239  
length is 225aa with 19 gaps, 1 stops, absolute frame=  
Plus2"

CDS 720377..721051

```

/colour="255 0 0"
/evidence=predicted
/translation="SXGICMKCPECGQH-IHKNHGRR-GKQNHICVTCGRQFL--ST
YSKRGYSdwTKRLCLRMVNGMGLKGIERVIGVAHTTVIHVVQVGVLLPDAYDPDD-
-----IP---QVGELDELETFVGGKRNKVWIW-TVVDHFHFG--ILGWVGNHSAETF
RPLWqaIVCWQCFFWVSDGNPVYpgFIPEgDQIVSKTYMTRVEGENTRLRHYLARLHR
KTLCYSKSVDMLKHSIRLL---IHYL"
/note="IS1_ORF1 e-value= 2.4e-40 complete sequence hit
coverage= 100%, between model( 239 aa) positions 1; 239
length is 225aa with 19 gaps, 1 stops, absolute frame=
Plus2"
CDS 720377..721057
/colour="255 0 0"
/evidence=predicted
/translation="SXGICMKCPECGQH-IHKNHGRR-GKQNHICVTCGR---QFL
STYSKRGysdwTKRLCLRMVNGMGLKGIERVIGVAHTTVIHVVQV--GVLLPDAYD
PDDIPQVGELDELETFVGGKRNKVWIWTVVDHFHFGILGWVGNHSAETFRLWQAIV
CWQ-CFFWVSDGNPVYPGFIPEG----DQIVSKTYMTRVEGENTRLRHYLARLHRKTL
CYSKSVDMLKHSIRLLI-HYLKF"
/note="IS1_ORF2 e-value= 1.5e-28 complete sequence hit
coverage= 100%, between model( 237 aa) positions 1; 237
length is 227aa with 14 gaps, 1 stops, absolute frame=
Plus2"
CDS 720656..721057
/colour="255 0 0"
/evidence=predicted
/translation="DPDDIPQVGELDELETFVGGKRNKVWIWTVVDHFHFGILGWVVG
NHAETFRPLWQAIVCWQ-CFFWVSDGNPVYPGFIPEG----DQIVSKTYMTRVEGEN
TRLRHYLARLHRKTLCYSKSVDMLKHSIRLLI-HYLKF"
/note="IS1_ORF2 e-value= 3e-31 fragment hit coverage=
59.07%, between model( 237 aa) positions 98; 237 length
is 134aa with 6 gaps, 0 stops, absolute frame= Plus2"
CDS 748838..749635
/colour="255 0 0"
/evidence=predicted
/translation="IRVSCVVAQGDGSTALLQAIHQAFGLEGxlfGCKLHPPLYCKKEN
DLVIKRGHSRICIWIWVRTAVVVLVLT-QKQWXTHSDYTLAVTSKRLFEEK-----XV
KLSRYXsvNTQTLDRTXRAMPTAYDSDLTTLQWELLEPLIPAAKP-GGRPRT-TDMLS
VLNAIFYLVVTGCQWRQLPHDFPCWSTVYSYFRRWRDDGTWSQINEHLRMQVRVSE--
-----DRHPSPSAAICDAQSVkvgnpRCHLIGFDGG
KMVKGRKRHVLDLGLVLMVMVTAANIS"
/note="IS5_IS427 e-value= 2.8e-07 complete sequence hit
coverage= 100%, between model( 296 aa) positions 1; 296
length is 266aa with 39 gaps, 5 stops, absolute frame=
Plus2"
CDS 749108..749977
/colour="255 0 0"
/evidence=predicted
/translation="EKXVKLSRYXsvNTQTLDRTXramptaYDSDLTTLQWELLEPLI
PAAKPG-----GRPRTDML-----SVLNAIFYLVVTGCQWRQ
--LPHDFPCWSTVYSYFRRWRDDGTWSQINEHLRMQVRVSED---RHPSPSAAICDAQ
SVK-----VGNpRCHLIGFD-----GGKM-
-----VKGRKRHVLD-TL
GLVLMVMVTAANISDQRGAK-----ILFWKAQRQGASLSRL
VR----IWADAGYQGQALMKWMDRFQYVLEVVKRSDNLAGFQVIPKRWIVERTFGWL
LWSRRLNKDYEVLTRTAEALVYVAMIRLMVRRLAQEHX"
/note="IS5_IS5 e-value= 1.8e-09 complete sequence hit
coverage= 100%, between model( 422 aa) positions 1; 422
length is 290aa with 140 gaps, 4 stops, absolute frame=
Plus2"

```

CDS 749147..749998  
/colour="255 0 0"  
/evidence=predicted  
/translation="TQTLDRTXRAM-----PTAYDSLTTLQWELLEPLIPAAK-----  
---PGGRPRTDMLSVLNAIFYLVVTCQWRQLPHDFPCWSTVYSYFRRWRDDGTWSQ  
INEHLRMQVRVSEDRHSPSPAICDAQSVKVG NPRCH-LIGFDGGKMKVGRKRHVLD  
TLGLVLMVMVTAANISDQR-GAKILFWKAQRQGaslSRLVRIWADAGYQGQALMKWVM  
DRFQYVLEVVKRSDNLAGFQVIPKRWIVERTFGWLLWSRRLNKDYEVLTRTAEALVYV  
AMIRLMVRRLAQEHNFSNSLX"  
/note="IS5\_IS1031 e-value= 1.8e-111 complete sequence hit  
coverage= 100%, between model( 295 aa) positions 1; 295  
length is 284aa with 14 gaps, 3 stops, absolute frame=  
Plus2"

CDS 749189..749998  
/colour="255 0 0"  
/evidence=predicted  
/translation="YDSLTTLQWELLEPLIPAAK-----PGGRPRTDMLSVLNA  
IFYLVVTCQWRQLPHDFPCWSTVYSYFRRWRDDGTWSQINEHLRMQVRVSEDRHSP  
SAAICDAQSVKVG NPRCH-LIGFDGGKMKVGRKRHVLDTLGLVLMVMVTAANISDQR  
-GAKILFWKAQRQGaslSRLVRIWADAGYQGQALMKWVM DRFQYVLEVVKRSDNLAGF  
QVIPKRWIVERTFGWLLWSRRLNKDYEVLTRTAEALVYVAMIRLMVRRLAQEHNFSN  
SLX"  
/note="IS5\_IS1031 e-value= 1.2e-113 fragment hit  
coverage= 93.56%, between model( 295 aa) positions 20;  
295 length is 270aa with 9 gaps, 2 stops, absolute frame=  
Plus2"

CDS 749198..749437  
/colour="255 0 0"  
/evidence=predicted  
/translation="DLTTLQWELLEPLIPAAKP-GGRPRT-TDMLSVLNAIFYLVVTC  
CQWRQLPHDFPCWSTVYSYFRRWRDDGTWSQINEHLRM"  
/note="IS5\_IS427 e-value= 2e-19 fragment hit coverage=  
27.70%, between model( 296 aa) positions 125; 206 length  
is 80aa with 2 gaps, 0 stops, absolute frame= Plus2"

CDS 791804..792046  
/colour="255 0 0"  
/evidence=predicted  
/translation="VKLAELIPWESFESEYADQFSQ---TMGAPAKPFRVALGTLLIK  
EKLGISDAETVEQIRENPYLOQYFLGFSEYRESAPFDASML"  
/note="IS5\_IS5 e-value= 2.6e-06 fragment hit coverage=  
19.91%, between model( 422 aa) positions 23; 106 length  
is 81aa with 3 gaps, 0 stops, absolute frame= Plus2"

CDS 940328..941023  
/colour="255 0 0"  
/evidence=predicted  
/translation="FKHLHLGMI sDIKRKSLPAIARAVGLENHQSLHHFLSESPWVAS  
hLSDkRLDIILKILDGRRLILLID-----ETGDCKKGKSTDYVVKR  
QYIGNVGKKENGIvAVTAYGLFQGMILPLSFEVYKPR-----ErLKEEDEYLSK  
PQIAAGMIRQLQGMGFCELVLADSLYGEAQTNFVNVLEELKLPYILAIRSNHAVWLP  
AEQAVFAEPWQSFERTFSNGTTETRYrQEIIYGqrhhQKRY"  
/note="IS4 e-value= 4.7e-14 fragment hit coverage=  
51.23%, between model( 486 aa) positions 1; 249 length is  
232aa with 27 gaps, 0 stops, absolute frame= Plus2"

CDS 940328..941455  
/colour="255 0 0"  
/evidence=predicted  
/translation="FKHLHLGMI sDIKRKSLPAIARAVGLENHQSLHHFLSESPWVAS  
hLSDkRLDIILKILDGRRLILLID-----ETGDCKKGKSTDYVVKR  
QYIGNVGKKENGIvAVTAYGLFQGMILPLSFEVYKPR-----ErLKEEDEYLSK  
PQIAAGMIRQLQGMGFCELVLADSLYGEAQTNFVNVLEELKLPYILAIRSNHAVWLP

AEQAVFAEPWQSFERTFSNGT-----TETRYR  
QEIIYGQRHHQKRYWLLTTDPQTLPENSTS-----YVMAA  
APE----IKLDEIGDCYGFRTWIEYGLKQSKD-TLGWADFRMTHYEQIEKWWEIVMSA  
FLMVSLFADVFNDS-----CPVAHQHFAQHPwWDNONG  
WKNLLNNVR--LIIQPLIS----WLLKRWLEVFPSRALKKGf"  
/note="IS4 e-value= 9.9e-07 complete sequence hit  
coverage= 100%, between model( 486 aa) positions 1; 486  
length is 376aa with 117 gaps, 0 stops, absolute frame=  
Plus2"

CDS 942041..942427  
/colour="255 0 0"  
/evidence=predicted  
/translation="YADESGMDHRDEYDY-AYGPKGE-----RVYA-LKTG-  
RRSGRVNMIAALRAKQL--MAPFTIEGACNRTVFELwLERCLIPvIKPGQKLVI--DN  
ATFHKGGQIQELVEKAG--CEVWYLPPYSPDLNKIERSWSWIKSRIR"  
/note="IS630 e-value= 1.1e-13 fragment hit coverage=  
38.83%, between model( 376 aa) positions 188; 333 length  
is 129aa with 20 gaps, 0 stops, absolute frame= Plus2"

CDS 1009808..1010014  
/colour="255 0 0"  
/evidence=predicted  
/translation="IKANILKGQLIQADETPIKMVK---RE--TGYVWVFTTTD----  
-----AVLYFFKSTRKAFFLKELLKDFGTGVLISDFYAGY"  
/note="IS66\_ORF2 e-value= 1e-08 fragment hit coverage=  
16.26%, between model( 535 aa) positions 243; 329 length  
is 69aa with 18 gaps, 0 stops, absolute frame= Plus2"

CDS 1009844..1010014  
/colour="255 0 0"  
/evidence=predicted  
/translation="ADETPIKMV-----KRETGYVWVFTTTD-----AVLYFFK  
STRKAFFLKELLKDFGTGVLISDFYAGY"  
/note="IS66\_ORF3 e-value= 3.6e-07 fragment hit coverage=  
12.72%, between model( 558 aa) positions 287; 357 length  
is 57aa with 14 gaps, 0 stops, absolute frame= Plus2"

CDS 1313054..1314091  
/colour="255 0 0"  
/evidence=predicted  
/translation="PMIKIDFTAEEIQQLNYERYHHPHPRVQRRMEVLYLKSQGLSHT  
QICQLCQISRPTLAKTLRQYQGG---IEGLKTLEYKQGPSLLNAHS-DSVRAYFEQH  
PP-----RTSAEAQAVIEQLTGIKRSPTQIKAFKLRIGCRYRKVGYPGKSSLP  
-EKIEEQEQFRHTRLEPLleeAQRQERLVFVDAAHFVHRAYLGF-VWCITRI-----  
-----FIPSPS-GRQRFNVLGALDAITKDLVSVTNHTYINSHSMCLLLAKLALL  
DPV-IPISVILDNARYQKCQLVTDFAEIVD--IELVYLPSYSPHLNLIERLWRFVVRKE  
CLYSKYYADFPFAFKGAIQQCIDQCNGEHKAKLTLLSLKFQSFKK"  
/note="IS630 e-value= 6.7e-25 complete sequence hit  
coverage= 100%, between model( 376 aa) positions 1; 376  
length is 346aa with 33 gaps, 0 stops, absolute frame=  
Plus2"

CDS 1313054..1314091  
/colour="255 0 0"  
/evidence=predicted  
/translation="PMIKIDFTAEEIQQLNYERYHHPHPRVQRRMEVLYLKSQGLSHT  
QICQLCQISRPTLAKTLRQYQGG---IEGLKTLEYKQGPSLLNAHS-DSVRAYFEQH  
PP-----RTSAEAQAVIEQLTGIKRSPTQIKAFKLRIGCRYRKVGYPGKSSLP  
-EKIEEQEQFRHTRLEPLleeAQRQERLVFVDAAHFVHRAYLGF-VWCITRI-----  
-----FIPSPS-GRQRFNVLGALDAITKDLVSVTNHTYINSHSMCLLLAKLALL  
DPV-IPISVILDNARYQKCQLVTDFAEIVD--IELVYLPSYSPHLNLIERLWRFVVRKE  
CLYSKYYADFPFAFKGAIQQCIDQCNGEHKAKLTLLSLKFQSFKK"  
/note="IS630 e-value= 4.9e-24 complete sequence hit  
coverage= 100%, between model( 376 aa) positions 1; 376



length is 346aa with 33 gaps, 0 stops, absolute frame= Plus2"

CDS 1313114..1313272  
/colour="255 0 0"  
/evidence=predicted  
/translation="HHPHPRVQRRMEVLYLKSQGLSHTQICQLCQISRPTLAKTLRQY  
QGGIEGLK"  
/note="IS481 e-value= 3.7e-09 fragment hit coverage= 15.10%, between model( 351 aa) positions 1; 53 length is 53aa with 0 gaps, 0 stops, absolute frame= Plus2"

CDS 1525481..1525684  
/colour="255 0 0"  
/evidence=predicted  
/translation="QRYQCKDCNRRFN-ERTGTPMARLRtasSVVSYAIKARTEGMGV  
RAAGRFTFGKSHTTIMRWEKRLADQA"  
/note="IS1\_ORF1 e-value= 2.6e-10 fragment hit coverage= 27.62%, between model( 239 aa) positions 28; 93 length is 68aa with 1 gaps, 0 stops, absolute frame= Plus2"

CDS 1529090..1529305  
/colour="255 0 0"  
/evidence=predicted  
/translation="REIHEAIGVSIRTIERVRMRFVEEG---LEAAINQRsGAGRKRK  
IQGEQEAHLIALRCSEPPVG---HARWTLRLLAD"  
/note="IS630 e-value= 9.9e-08 fragment hit coverage= 20.74%, between model( 376 aa) positions 44; 121 length is 72aa with 7 gaps, 0 stops, absolute frame= Plus2"

CDS 1580969..1581355  
/colour="255 0 0"  
/evidence=predicted  
/translation="YADESGMDHRDEYDY-AYGPKGE-----RVYA-LKTG-  
RRSGRVNMIAALRAKQL--MAPFTIEGACNRTVFEIWLercLIPMLKPGQKLVII--DN  
ATFHKGGRIQELVEKAG--CEVWYLPPYSPDLNKIERSWSWIKSRIR"  
/note="IS630 e-value= 6.9e-14 fragment hit coverage= 38.83%, between model( 376 aa) positions 188; 333 length is 129aa with 20 gaps, 0 stops, absolute frame= Plus2"

CDS 1587323..1587460  
/colour="255 0 0"  
/evidence=predicted  
/translation="WQTDGWEGYARQLPDE---VVHEVSKALTQRLERTNGIVRQQTG  
RWHRR"  
/note="IS1\_ORF2 e-value= 1.8e-11 fragment hit coverage= 20.68%, between model( 237 aa) positions 164; 212 length is 46aa with 3 gaps, 0 stops, absolute frame= Plus2"

CDS 1631051..1631893  
/colour="255 0 0"  
/evidence=predicted  
/translation="LDRTL RAMPTA-----YSDLTTLQWELLEPLIPAAK----  
---PGGRPRTTDMRSVLNAILYLVVTGCQWRQLPHDFPCWSTVYSYFRRWRDDGTWVH  
INEHLRMQERVSEDRHPSRAAICDAQSVKVG NPRCH-SIGFDGKQIKGRKRHVLVD  
TLGLVLMVIVTAANISDQR-GAKILFWKARRQGaslSRLVRIWADAGYQGQAFMKWVM  
DRFQYVLEVIKRSNDLAGFQVIPKRWIVERTFGWLLWSRRLNKDYEVLT RTAEALVYV  
AMIRLMVRRRLTEEAXNFSNSLL"  
/note="IS5\_IS1031 e-value= 2.8e-110 complete sequence hit coverage= 100%, between model( 295 aa) positions 1; 295 length is 281aa with 17 gaps, 1 stops, absolute frame= Plus2"

CDS 1631084..1631893  
/colour="255 0 0"  
/evidence=predicted  
/translation="YSDLTTLQWELLEPLIPAAK-----PGGRPRTTDMRSVLNA

ILYLVVTGCQWRQLPHDFPCWSTVYSYFRRWRDDGTWVHINEHLRMQERVSEDRHPSP  
 RAAICDAQSVKVG NPRCH-SIGFDGGKQIKGRKRHVLDVTLGLVLMVIVTAANISDQR  
 -GAKILFWKARRQGaslSRLVRIWADAGYQGQAFMKWVMDRFQYVLEVIKRSNDLAGF  
 QVIPKRWIVERTFGWLLWSRRLNKDYEVLT RTAEALVYVAMIRLMVRRLTEEXNFSN  
 SLL"  
 /note="IS5\_IS1031 e-value= 1.4e-112 fragment hit  
 coverage= 93.56%, between model( 295 aa) positions 20;  
 295 length is 270aa with 9 gaps, 1 stops, absolute frame=  
 Plus2"  
 CDS 1631093..1631332  
 /colour="255 0 0"  
 /evidence=predicted  
 /translation="DLTTLQWELLEPLIPAAKP-GGRPRT-TDMRSVLNAILYLVVTG  
 CQWRQLPHDFPCWSTVYSYFRRWRDDGTWVHINEHLRM"  
 /note="IS5\_IS427 e-value= 1.2e-18 fragment hit coverage=  
 27.70%, between model( 296 aa) positions 125; 206 length  
 is 80aa with 2 gaps, 0 stops, absolute frame= Plus2"  
 CDS 2086388..2086531  
 /colour="255 0 0"  
 /evidence=predicted  
 /translation="VIVIDNASFHHGQRIEEIVAEAG--CEIWYLPYSYSPDLNKIERW  
 WFVLKN"  
 /note="IS630 e-value= 1.7e-14 fragment hit coverage=  
 13.30%, between model( 376 aa) positions 281; 330 length  
 is 48aa with 2 gaps, 0 stops, absolute frame= Plus2"  
 CDS 2216453..2216695  
 /colour="255 0 0"  
 /evidence=predicted  
 /translation="VKLAELIPWESFESEYADQFSQ---TMGAPAKPFRVALGTLIIK  
 EKLGISDAETVEQIRENPYLOQYFLGFSEYRESAPFDASML"  
 /note="IS5\_IS5 e-value= 2.6e-06 fragment hit coverage=  
 19.91%, between model( 422 aa) positions 23; 106 length  
 is 81aa with 3 gaps, 0 stops, absolute frame= Plus2"  
 CDS 2274167..2274631  
 /colour="255 0 0"  
 /evidence=predicted  
 /translation="LSIYYPKHASPCLR---TFSA--RLXLLHISnagXRSSIKKSIV  
 ENHLGNYAVtrLTILKGMVSKDHDHTLIEYPPSKSISDIAKRLKGFSTRRLQOEYREL  
 ERRYWDKYLWALGYGAWSTGNISEQMVEEYLEHHRLVSNNDINTFMLEXIKTLVLRRI  
 "  
 /note="IS200 e-value= 1.5e-09 complete sequence hit  
 coverage= 100%, between model( 154 aa) positions 1; 154  
 length is 155aa with 5 gaps, 3 stops, absolute frame=  
 Plus2"  
 CDS 2274167..2274628  
 /colour="255 0 0"  
 /evidence=predicted  
 /translation="LSIYYPKHASPCLR---TFSARLXLLHISNAGXRSSIKKSIVEN  
 hLGNyAvtrLTILKGMVSKDHDHTLIEYPPSKSISDIAKRLKGFSTRRLQOEYRELER  
 RYWDKYLWALGYGAWSTGNISEQMVEEYLEHHRLVSNNDINTFMLEXIKTLVLRRI"  
 /note="IS200\_IS605 e-value= 3.6e-09 complete sequence hit  
 coverage= 100%, between model( 153 aa) positions 1; 153  
 length is 154aa with 3 gaps, 3 stops, absolute frame=  
 Plus2"  
 CDS 2274320..2274559  
 /colour="255 0 0"  
 /evidence=predicted  
 /translation="TILKGMVSKDHDHTLIEYPPSKSISDIAKRLKGFSTRRLQOEYR  
 ELERRYWDKYLWALGYGAWSTGNISEQMVEEYLEHH"  
 /note="IS200 e-value= 3.2e-19 fragment hit coverage=

51.95%, between model( 154 aa) positions 51; 130 length is 80aa with 0 gaps, 0 stops, absolute frame= Plus2"

CDS 2274320..2274559  
/colour="255 0 0"  
/evidence=predicted  
/translation="TILKGMVSKDHDHTLIEYPPSKSISDIAKRLKGFSTRRLQOEYR ELERRYWDKYLWALGYGAWSTGNISEQMVEEYLEHH"  
/note="IS200\_IS605 e-value= 7.4e-15 fragment hit coverage= 52.29%, between model( 153 aa) positions 51; 130 length is 80aa with 0 gaps, 0 stops, absolute frame= Plus2"

CDS 2409029..2410090  
/colour="255 0 0"  
/evidence=predicted  
/translation="IVKRXKN-----EQCIVSHpYPALXPPQPLAOG---ISSA--- --RQXHFSESEQRRQRXSENCVSRASSRPIDAAIRDRKKSLNVLTP--NQKRQMVRL QODYSIRQICQVLNYPQRSQVYYHARGQP-----DESELKAAIAGVAGAYP-TYGYRRI TAQLQ---RQGYCVNHKRVARLMRQIGIMAKTKVK-RKRTTSEHSfPRYGNRVLNLS --IDHPEQVWVADITYIRLQ-QEFVYLAVVMDVFTRAIRGWHLRSRHIDQQLTLRALNK ALERAT---PEIHHS-----DQGVQYAAAAYMQLLQHQVQVQISMAEVBQAWQNGYAER LMRTIKKEEVD--LSDYRNFTTEAYEHIEQFLEDVYMHKRIHSSLGYLTPCEYEQQWRQ Q"  
/note="IS3\_IS150\_ORF2 e-value= 1.7e-22 complete sequence hit coverage= 100%, between model( 389 aa) positions 1; 389 length is 354aa with 39 gaps, 5 stops, absolute frame= Plus2"

CDS 2409203..2410087  
/colour="255 0 0"  
/evidence=predicted  
/translation="PIDAAIRDRKKSLnVLTPNQKRQMVRLQODYSIRQICQVLNYP RSQVYYHARGQPDESELKAAIAGV-AGAYPTYGYRRIITAQLQRQGYCVNHKRVARLMR QIGIMAKTKVK----RKRTTSEHSF-PRYGNRvLNLSIDHPEQVWVADITYIRL--Q QEFVYLAVVMDVFTRAIRGWHLRSRHIDQQLTLRALNKALER----ATPEIHHS DQGVQ YAAAAYMQLLQHQVQVQISMAEVBQAWQNGYAERLMRTIKKEEVDLSDYRNFT--EAYE HIEQFLEDVYMHKRIHSSLGYLTPCEYEQQWRQ"  
/note="IS3\_IS150\_ORF1 e-value= 4.3e-49 complete sequence hit coverage= 100%, between model( 306 aa) positions 1; 306 length is 295aa with 14 gaps, 0 stops, absolute frame= Plus2"

CDS 2409239..2410123  
/colour="255 0 0"  
/evidence=predicted  
/translation="LNVLTPNQK-RQMVRLQqDYSIRQICQVLNYP---RSQVYYHA RgQPDESELKA--AIAGV-----AGA---YPTYGYRRIITAQLQRQGYCVNHKRVAR LMRQIGIMAKTKVKRKRTTSEHSFPRYGNRVL-NLSIDHPEQVWVADITYIRLQOEF VYLAVVMDVFTRAIRGWHLRSRHIDQQLTLRALNKALERATPE-----IHSDQGV QYAAAAYMQLLQHQVQVQISMAEVBQAWQNGYAERLMRTIKKEEVDLSDYrnFTTEAYEH IEQFLEDV--YMHKRIHSSLGYLTPCEYEQQWRQNNHYCMNKEDS"  
/note="IS3\_IS51\_ORF2 e-value= 1.6e-26 complete sequence hit coverage= 100%, between model( 317 aa) positions 1; 317 length is 295aa with 27 gaps, 0 stops, absolute frame= Plus2"

CDS 2409245..2409499  
/colour="255 0 0"  
/evidence=predicted  
/translation="VLTPNQKROMVRLQODY--SIRQICQVLNYPQRSQVYYHARGQP DESELKAAIAGVAGAYPTYGYRRIITAQLQRQGYCVNHKRVARL"  
/note="IS3\_IS407\_ORF2 e-value= 1.2e-17 fragment hit coverage= 25.29%, between model( 344 aa) positions 60; 146 length is 85aa with 2 gaps, 0 stops, absolute frame=

Plus2"

CDS 2409263..2410090  
/colour="255 0 0"  
/evidence=predicted  
/translation="KRQMVRLQODYSIRQICQVLNYPQRSQVYYHARGQP-----DES  
ELKAAIAGVAGAYP-TYGYRRITAQLQ---RQGYCVNHKRVARLMRQIGIMAKTKVK-  
RKRTTNSHSfPRYGNRVLNLS--IDHPEQVWVADITYIRLQ-QEFVYLAVVMDVFTR  
AIRGWHLRHRIDQQLTLRALNKALERAT---PEIHHS-----DQGVQYAAAAYMQLLQ  
QHQQVQISMAEVGQAWQNGYAERLMRTIKEEEVD--LSDYRNFTEAYEHIEQFLEdVYM  
HKRIHSSLGYLTPCEYEQQWRQO"  
/note="IS3\_IS150\_ORF2 e-value= 2.2e-47 fragment hit  
coverage= 76.09%, between model( 389 aa) positions 94;  
389 length is 276aa with 23 gaps, 0 stops, absolute  
frame= Plus2"

CDS 2409266..2410114  
/colour="255 0 0"  
/evidence=predicted  
/translation="RQMVRLQODYSIRQICQVLNYPQRSQVYYHA-----RG  
QPDES ELKAAIAGV-AGAYPTYGYRRITAQLQRQGYCVNHKRVARLMRQIGIMAKTKV  
KRRTTNSHSFPRYGNRVL-NLSIDHPEQVWVADITYIRLQQEFVYLAVVMDVFTRA  
IRGWHLRHRIDQQLT-LRALNKALERATPE-----IHSDQGVQYAAAAYMQLLQO  
HQVQISMAEVGQAWQNGYAERLMRTIKEEEVDL---S-DYRNFTEAYEHIEQFLEDVY  
MHKRIHSSLGYLTPCEYEQQWRQONNHCMNK"  
/note="IS3\_IS51\_ORF1 e-value= 8.1e-53 complete sequence  
hit coverage= 100%, between model( 307 aa) positions 1;  
307 length is 283aa with 25 gaps, 0 stops, absolute  
frame= Plus2"

CDS 2409266..2410114  
/colour="255 0 0"  
/evidence=predicted  
/translation="RQMVRLQODYSIRQICQVLNYPQRSQVYYHA-----RG  
QPDES ELKAAIAGV-AGAYPTYGYRRITAQLQRQGYCVNHKRVARLMRQIGIMAKTKV  
KRRTTNSHSFPRYGNRVL-NLSIDHPEQVWVADITYIRLQQEFVYLAVVMDVFTRA  
IRGWHLRHRIDQQLT-LRALNKALERATPE-----IHSDQGVQYAAAAYMQLLQO  
HQVQISMAEVGQAWQNGYAERLMRTIKEEEVDL---S-DYRNFTEAYEHIEQFLEDVY  
MHKRIHSSLGYLTPCEYEQQWRQONNHCMNK"  
/note="IS3\_IS51\_ORF1 e-value= 6.3e-51 complete sequence  
hit coverage= 100%, between model( 307 aa) positions 1;  
307 length is 283aa with 25 gaps, 0 stops, absolute  
frame= Plus2"

CDS 2409269..2410084  
/colour="255 0 0"  
/evidence=predicted  
/translation="QMVRLQODYSIRQICQVLNYPQRSQVYYHARG--QPD-----ES  
ELKAAI-AGVAGAYPTYGYRRITAQLQ-RQGYCVNHKRVARLMRQIGIMAKTKVKRKR  
TTNSHSfPRYGNRVLNLS-IDHPEQVWVADITYIRLQQEFVYLAVVMDVFTRAIRGW  
HLRHRIDQQLTLRALNKALERA-TPE--IHSDQGVQYAAAAYMQLLQOQHQQVQISMAE  
VGQAWQNGYAERLMRTIK-EEVDL--SDYRNFTEAYEHIEQFLEDVYMHKRIHSSLGY  
LTPCEYEQQWR"  
/note="IS3\_IS3\_ORF1 e-value= 9.5e-54 complete sequence  
hit coverage= 100%, between model( 286 aa) positions 1;  
286 length is 272aa with 15 gaps, 0 stops, absolute  
frame= Plus2"

CDS 2409269..2410084  
/colour="255 0 0"  
/evidence=predicted  
/translation="QMVRLQODYSIRQICQVLNYPQRSQVYYHARG--QPD-----ES  
ELKAAI-AGVAGAYPTYGYRRITAQLQ-RQGYCVNHKRVARLMRQIGIMAKTKVKRKR  
TTNSHSfPRYGNRVLNLS-IDHPEQVWVADITYIRLQQEFVYLAVVMDVFTRAIRGW  
HLRHRIDQQLTLRALNKALERA-TPE--IHSDQGVQYAAAAYMQLLQOQHQQVQISMAE

VGQAWQNGYAERLMRTIK-EEEVDL-SDYRNFTEAYEHIEQFLEDVYMHKRIHSSLGY  
 LTPCEYEQQWR"  
 /note="IS3\_IS3\_ORF1 e-value= 2.5e-54 complete sequence  
 hit coverage= 100%, between model( 286 aa) positions 1;  
 286 length is 272aa with 15 gaps, 0 stops, absolute  
 frame= Plus2"  
 CDS 2409272..2410087  
 /colour="255 0 0"  
 /evidence=predicted  
 /translation="MVRQLQQDYSIRQICQVLNYPRSQVYYHARGQPDESELKAAIAG  
 V-AGAYPTYGYRRITAQLQRQGYCVNHKRVARLMRQIGIMAKTKVK----RKRTTNSE  
 HSF-PRYGNRVLNLSIDHPEQVWVADITYIRL--QQEFVYLAVVMDVFTRAIRGWHL  
 RHIDQQLTLRALNKALER----ATPEIHHSQGVQYAAAAAYMQLLQHQVQVQISM  
 AEVQAWQNGYAERLMRTIKEEEVDLSDYRNFTEAYEHIEQFLEDVYMHKRIHSSLGYLT  
 PCEYEQQWRQ"  
 /note="IS3\_IS150\_ORF1 e-value= 6.3e-50 fragment hit  
 coverage= 92.81%, between model( 306 aa) positions 23;  
 306 length is 272aa with 14 gaps, 0 stops, absolute  
 frame= Plus2"  
 CDS 2409281..2410096  
 /colour="255 0 0"  
 /evidence=predicted  
 /translation="QLQQDYSIRQICQVLNYPRSQVYYHARGQPDE-----SEL  
 KAAIAGVAGayPTYGYRRITAQLQRQGYCVNHKRVARLMRQIGIMAKTKVKRRTTNS  
 EHSFPRY---GNRVLNLSIDHPEQVWVADITYIRLQQEFVYLAVVMDVFTRAIRGWHL  
 SRHIDQQLTLRALNKALER----ATPE---IHHSQGVQYAAAAAYMQLLQHQVQVQISM  
 AEVQAWQNGYAERLMRTIKEEEVDLSDYRNFTEAYEHIEQFLEDVYMHKRIHSSLGY  
 LTPCEYEQQWRQNN"  
 /note="IS3\_IS3\_ORF2 e-value= 1.2e-64 complete sequence  
 hit coverage= 100%, between model( 288 aa) positions 1;  
 288 length is 272aa with 19 gaps, 0 stops, absolute  
 frame= Plus2"  
 CDS 2409281..2410096  
 /colour="255 0 0"  
 /evidence=predicted  
 /translation="QLQQDYSIRQICQVLNYPRSQVYYHARGQPDE-----SEL  
 KAAIAGVAGayPTYGYRRITAQLQRQGYCVNHKRVARLMRQIGIMAKTKVKRRTTNS  
 EHSFPRY---GNRVLNLSIDHPEQVWVADITYIRLQQEFVYLAVVMDVFTRAIRGWHL  
 SRHIDQQLTLRALNKALER----ATPE---IHHSQGVQYAAAAAYMQLLQHQVQVQISM  
 AEVQAWQNGYAERLMRTIKEEEVDLSDYRNFTEAYEHIEQFLEDVYMHKRIHSSLGY  
 LTPCEYEQQWRQNN"  
 /note="IS3\_IS3\_ORF2 e-value= 3.3e-65 complete sequence  
 hit coverage= 100%, between model( 288 aa) positions 1;  
 288 length is 272aa with 19 gaps, 0 stops, absolute  
 frame= Plus2"  
 CDS 2409350..2409508  
 /colour="255 0 0"  
 /evidence=predicted  
 /translation="YHARGQPDESELKAAIAGVAGAYPTYGYRRITAQLQRQGY----  
 -CVNHKRVARLMRQ"  
 /note="IS3\_IS2\_ORF2 e-value= 9.1e-09 fragment hit  
 coverage= 18.87%, between model( 302 aa) positions 48;  
 104 length is 53aa with 5 gaps, 0 stops, absolute frame=  
 Plus2"  
 CDS 2409416..2410099  
 /colour="255 0 0"  
 /evidence=predicted  
 /translation="YPTYGYRRITAQLQRQGYCVNHKRVARLMRQIGIMAKTKVKRKR  
 TTNSEHSFPRYGNRVL-NLSIDHPEQVWVADITYIRLQQEFVYLAVVMDVFTRAIRGW  
 HLSRHIDQQLTLRALNKALERATPE-----IHHSQGVQYAAAAAYMQLLQHQVQ

ISMAEVGQAWQNGYAERLMRTIKEEEVDLSDYrnFTEAYEHIEQFLEDV--YMHKRIH  
SSLGylTPCEYEQQWRQONNH"  
/note="IS3\_IS51\_ORF2 e-value= 1.9e-38 fragment hit  
coverage= 74.76%, between model( 317 aa) positions 73;  
309 length is 228aa with 11 gaps, 0 stops, absolute  
frame= Plus2"  
CDS 2500838..2501899  
/colour="255 0 0"  
/evidence=predicted  
/translation="IVKRXKN-----EQCIVSHpYPALXPPQPLAQG---ISSA---  
--RQXHFxESEQRQRXSENCsvRASSRPIDAAIRDRKKSLNVLTP--NQRQMVRL  
QQDYSIRQICQVLNYPRSQVYYHARGQP-----DESELKAAIAGVAGAYP-TYGYRRI  
TAQLQ---RQGYCVNHKRVARLMRQIGIMAKTKVK-RKRTTNSEHSfprYGnrVlNLS  
--IDHPEQVWVADITYIRLQ-QEFVYLAVVMDVFTRAIRGWHLsrHIDQQLTLRALNK  
ALERAT---PEIHHS-----DOGVOYAAAAYMQLLQHQVQISMAEVGQAWQNGYAER  
LMRTIKEEEVD--LSDYRNFTAYEHIEQFLEDVYMHKRIHSSLGylTPCEYEQQWRQ  
Q"  
/note="IS3\_IS150\_ORF2 e-value= 1.7e-22 complete sequence  
hit coverage= 100%, between model( 389 aa) positions 1;  
389 length is 354aa with 39 gaps, 5 stops, absolute  
frame= Plus2"  
CDS 2501012..2501896  
/colour="255 0 0"  
/evidence=predicted  
/translation="PIDAAIRDRKKSLnVLTPNQRQMVRLQQDYSIRQICQVLNYP  
RSQVYYHARGQPDESELKAAIAGV-AGAYPTYGYRRITaQLQRQGYCVNHKRVARLMR  
QIGIMAKTKVK----RKRTTNSEHSF-PRYGNrvlNLSIDHPEQVWVADITYIRL--Q  
QEFVYLAVVMDVFTRAIRGWHLsrHIDQQLTLRALNKALER----ATPEIHHSDOGVO  
YAAAAYMQLLQHQVQISMAEVGQAWQNGYAERLMRTIKEEEVDLSDYRNFT--EAYE  
HIEQFLEDVYMHKRIHSSLGylTPCEYEQQWRQ"  
/note="IS3\_IS150\_ORF1 e-value= 4.3e-49 complete sequence  
hit coverage= 100%, between model( 306 aa) positions 1;  
306 length is 295aa with 14 gaps, 0 stops, absolute  
frame= Plus2"  
CDS 2501048..2501932  
/colour="255 0 0"  
/evidence=predicted  
/translation="LNVLTPNQR-RQMVRLQqDYSIRQICQVLNYP---RSQVYYHA  
RgQPDESELKA--AIAGV-----AGA---YPTYGYRRITaQLQRQGYCVNHKRVAR  
LMRQIGIMAKTKVkrKRTTNSEHSfprYGnrVl-NLSIDHPEQVWVADITYIRLQqEF  
VYLAVVMDVFTRAIRGWHLsrHIDQQLTLRALNKALERATPE-----IHHSDOGVO  
YAAAAYMQLLQHQVQISMAEVGQAWQNGYAERLMRTIKEEEVDLSDYrnFTEAYEH  
IEQFLEDV--YMHKRIHSSLGylTPCEYEQQWRQONNHycMNKEDS"  
/note="IS3\_IS51\_ORF2 e-value= 1.6e-26 complete sequence  
hit coverage= 100%, between model( 317 aa) positions 1;  
317 length is 295aa with 27 gaps, 0 stops, absolute  
frame= Plus2"  
CDS 2501054..2501308  
/colour="255 0 0"  
/evidence=predicted  
/translation="VLTPNQRQMVRLQQDY--SIRQICQVLNYPRSQVYYHARGQP  
DESELKAAIAGVAGAYPTYGYRRITaQLQRQGYCVNHKRVARL"  
/note="IS3\_IS407\_ORF2 e-value= 1.2e-17 fragment hit  
coverage= 25.29%, between model( 344 aa) positions 60;  
146 length is 85aa with 2 gaps, 0 stops, absolute frame=  
Plus2"  
CDS 2501072..2501899  
/colour="255 0 0"  
/evidence=predicted  
/translation="KRQMVRLQQDYSIRQICQVLNYPRSQVYYHARGQP-----DES

```

ELKAAIAGVAGAYP-TYGYRRITAQLQ---RQGYCVNHKRVARLMRQIGIMAKTKVK-
RKRTTNSHSfPRYGNRVLNLS--IDHPEQVWVADITYIRLQ-QEFVYLAVVMDVFTR
AIRGWHLRHRIDQQLTLRALNKALERAT---PEIHHS-----DQGVQYAAAAYMQLLQ
QHQQVQISMAEVBQAWQNGYAERLMRTIKEEEVD--LSDYRNFTEAYEHIEQFLEDVYM
HKRIHSSLGYLTPCEYEQQWRQQ"
/note="IS3_IS150_ORF2      e-value= 2.2e-47 fragment hit
coverage= 76.09%, between model( 389 aa) positions 94;
389 length is 276aa with 23 gaps, 0 stops, absolute
frame= Plus2"
CDS      2501075..2501923
/colour="255 0 0"
/evidence=predicted
/translation="RQMVRLQDQDYSIRQICQVLNYPRSQVYYHA-----RG
QPDEsELKAAIAGV-AGAYPTYGYRRITAQLQORQGYCVNHKRVARLMRQIGIMAKTKV
KRKRTTNSHSFPRYGNRVL-NLSIDHPEQVWVADITYIRLQQEFVYLAVVMDVFTRA
IRGWHLRHRIDQQLT-LRALNKALERATPE-----IHHSQDGVQYAAAAYMQLLQ
HQVQISMAEVBQAWQNGYAERLMRTIKEEEVDL---S-DYRNFTEAYEHIEQFLEDVY
MHKRIHSSLGYLTPCEYEQQWRQQNNHYCMNK"
/note="IS3_IS51_ORF1      e-value= 8.1e-53 complete sequence
hit coverage= 100%, between model( 307 aa) positions 1;
307 length is 283aa with 25 gaps, 0 stops, absolute
frame= Plus2"
CDS      2501075..2501923
/colour="255 0 0"
/evidence=predicted
/translation="RQMVRLQDQDYSIRQICQVLNYPRSQVYYHA-----RG
QPDEsELKAAIAGV-AGAYPTYGYRRITAQLQORQGYCVNHKRVARLMRQIGIMAKTKV
KRKRTTNSHSFPRYGNRVL-NLSIDHPEQVWVADITYIRLQQEFVYLAVVMDVFTRA
IRGWHLRHRIDQQLT-LRALNKALERATPE-----IHHSQDGVQYAAAAYMQLLQ
HQVQISMAEVBQAWQNGYAERLMRTIKEEEVDL---S-DYRNFTEAYEHIEQFLEDVY
MHKRIHSSLGYLTPCEYEQQWRQQNNHYCMNK"
/note="IS3_IS51_ORF1      e-value= 6.3e-51 complete sequence
hit coverage= 100%, between model( 307 aa) positions 1;
307 length is 283aa with 25 gaps, 0 stops, absolute
frame= Plus2"
CDS      2501078..2501893
/colour="255 0 0"
/evidence=predicted
/translation="QMVRLQDQDYSIRQICQVLNYPRSQVYYHARG--QPD-----ES
ELKAAI-AGVAGAYPTYGYRRITAQLQ-RQGYCVNHKRVARLMRQIGIMAKTKVKRKR
TTNSHSfPRYGNRVLNLS-IDHPEQVWVADITYIRLQQEFVYLAVVMDVFTRAIRGW
HLSRHRIDQQLTLRALNKALERA-TPE--IHHSQDGVQYAAAAYMQLLQHQVQISMAE
VGQAWQNGYAERLMRTIK-EEVDL--SDYRNFTEAYEHIEQFLEDVYMHKRIHSSLGY
LTPCEYEQQWR"
/note="IS3_IS3_ORF1      e-value= 9.5e-54 complete sequence
hit coverage= 100%, between model( 286 aa) positions 1;
286 length is 272aa with 15 gaps, 0 stops, absolute
frame= Plus2"
CDS      2501078..2501893
/colour="255 0 0"
/evidence=predicted
/translation="QMVRLQDQDYSIRQICQVLNYPRSQVYYHARG--QPD-----ES
ELKAAI-AGVAGAYPTYGYRRITAQLQ-RQGYCVNHKRVARLMRQIGIMAKTKVKRKR
TTNSHSfPRYGNRVLNLS-IDHPEQVWVADITYIRLQQEFVYLAVVMDVFTRAIRGW
HLSRHRIDQQLTLRALNKALERA-TPE--IHHSQDGVQYAAAAYMQLLQHQVQISMAE
VGQAWQNGYAERLMRTIK-EEVDL--SDYRNFTEAYEHIEQFLEDVYMHKRIHSSLGY
LTPCEYEQQWR"
/note="IS3_IS3_ORF1      e-value= 2.5e-54 complete sequence
hit coverage= 100%, between model( 286 aa) positions 1;
286 length is 272aa with 15 gaps, 0 stops, absolute

```

frame= Plus2"  
 CDS 2501081..2501896  
 /colour="255 0 0"  
 /evidence=predicted  
 /translation="MVRQLQDDYSIRQICQVLNYPQRSQVYYHARGQPDESELKAAIAG  
 V-AGAYPTYGYRRITAQLQRQGYCVNHKRVARLMRQIGIMAKTKVK----RKRTTNSE  
 HSF-PRYGNRvLNLSIDHPEQVWVADITYIRL--QQEFVYLAVVMDVFTRAIRGWHL  
 RHIDQQLTLRALNKALER----ATPEIHSDQGVQYAAAAAYMQLLQHQVQISMAEVB  
 QAWQNGYAERLMRTIKEEEVDLSDYRNFT--EAYEHIEQFLEDVYMHKRIHSSLGILT  
 PCEYEQQWRQ"  
 /note="IS3\_IS150\_ORF1 e-value= 6.3e-50 fragment hit  
 coverage= 92.81%, between model( 306 aa) positions 23;  
 306 length is 272aa with 14 gaps, 0 stops, absolute  
 frame= Plus2"

CDS 2501090..2501905  
 /colour="255 0 0"  
 /evidence=predicted  
 /translation="QLQDDYSIRQICQVLNYPQRSQVYYHARGQPDE-----SEL  
 KAAIAGVAGayPTYGYRRITAQLQRQGYCVNHKRVARLMRQIGIMAKTKVKRRTTNS  
 EHSFPRY---GNRVLNLSIDHPEQVWVADITYIRLQQEFVYLAVVMDVFTRAIRGWHL  
 SRHIDQQLTLRALNKALER----ATPE---IHSDQGVQYAAAAAYMQLLQHQVQISM  
 AEVQAWQNGYAERLMRTIKEEEVDLSDYRNFTTEAYEHIEQFLEDVYMHKRIHSSLGY  
 LTPCEYEQQWRQONN"  
 /note="IS3\_IS3\_ORF2 e-value= 1.2e-64 complete sequence  
 hit coverage= 100%, between model( 288 aa) positions 1;  
 288 length is 272aa with 19 gaps, 0 stops, absolute  
 frame= Plus2"

CDS 2501090..2501905  
 /colour="255 0 0"  
 /evidence=predicted  
 /translation="QLQDDYSIRQICQVLNYPQRSQVYYHARGQPDE-----SEL  
 KAAIAGVAGayPTYGYRRITAQLQRQGYCVNHKRVARLMRQIGIMAKTKVKRRTTNS  
 EHSFPRY---GNRVLNLSIDHPEQVWVADITYIRLQQEFVYLAVVMDVFTRAIRGWHL  
 SRHIDQQLTLRALNKALER----ATPE---IHSDQGVQYAAAAAYMQLLQHQVQISM  
 AEVQAWQNGYAERLMRTIKEEEVDLSDYRNFTTEAYEHIEQFLEDVYMHKRIHSSLGY  
 LTPCEYEQQWRQONN"  
 /note="IS3\_IS3\_ORF2 e-value= 3.3e-65 complete sequence  
 hit coverage= 100%, between model( 288 aa) positions 1;  
 288 length is 272aa with 19 gaps, 0 stops, absolute  
 frame= Plus2"

CDS 2501159..2501317  
 /colour="255 0 0"  
 /evidence=predicted  
 /translation="YHARGQPDESELKAAIAGVAGAYPTYGYRRITAQLQRQGY----  
 -CVNHKRVARLMRQ"  
 /note="IS3\_IS2\_ORF2 e-value= 9.1e-09 fragment hit  
 coverage= 18.87%, between model( 302 aa) positions 48;  
 104 length is 53aa with 5 gaps, 0 stops, absolute frame=  
 Plus2"

CDS 2501225..2501908  
 /colour="255 0 0"  
 /evidence=predicted  
 /translation="YPTYGYRRITAQLQRQGYCVNHKRVARLMRQIGIMAKTKVKRKR  
 TTNSEHSFPRYGNRVL-NLSIDHPEQVWVADITYIRLQQEFVYLAVVMDVFTRAIRGW  
 HLSRHIDQQLTLRALNKALERATPE-----IHSDQGVQYAAAAAYMQLLQHQVQ  
 ISMAEVBQAWQNGYAERLMRTIKEEEVDLSDYrnFTEAYEHIEQFLEDV--YMHKRIH  
 SSLGILTTPCEYEQQWRQONNH"  
 /note="IS3\_IS51\_ORF2 e-value= 1.9e-38 fragment hit  
 coverage= 74.76%, between model( 317 aa) positions 73;  
 309 length is 228aa with 11 gaps, 0 stops, absolute



frame= Plus2"  
 CDS 2629103..2629798  
 /colour="255 0 0"  
 /evidence=predicted  
 /translation="FKHLHLGMISDIKRKSLPAIARAVGLENHQSLHHFLSESPWVAS  
 hLSDkRLDIILKILDGRRLLILLID-----ETGDCKKKGKSTDYVVKR  
 QYIGNVGGKENGIVAVTAYGLFQGMILPLSFEVYKPR-----ErLKEEDEYLSK  
 PQIAAGMIRQLQGMGFCFELVLADSLYGEAQTNFVNVLEELKLPYILAIRSNHAVWLP  
 AEQAVFAEPWQSFERTFSNGTTETRYrQEIIYGqrhhQKRY"  
 /note="IS4 e-value= 4.7e-14 fragment hit coverage=  
 51.23%, between model( 486 aa) positions 1; 249 length is  
 232aa with 27 gaps, 0 stops, absolute frame= Plus2"  
 CDS 2629103..2630230  
 /colour="255 0 0"  
 /evidence=predicted  
 /translation="FKHLHLGMISDIKRKSLPAIARAVGLENHQSLHHFLSESPWVAS  
 hLSDkRLDIILKILDGRRLLILLID-----ETGDCKKKGKSTDYVVKR  
 QYIGNVGGKENGIVAVTAYGLFQGMILPLSFEVYKPR-----ErLKEEDEYLSK  
 PQIAAGMIRQLQGMGFCFELVLADSLYGEAQTNFVNVLEELKLPYILAIRSNHAVWLP  
 AEQAVFAEPWQSFERTFSNGT-----TETRYR  
 QEIIYGQRHHQKRYWLLTTDPQTLPENSTS-----YVMAA  
 APE----IKLDEIGDCYGFRTWIEYGLKQSKD-TLGWADFRMTHYEQIEKWWEIVMSA  
 FLMVSLFADVFNDS-----CPVAHQHFAQHPwWDNONG  
 WKNLLNNVR--LIIQPLIS----WNLKRWLEVFPSRALKKGF"  
 /note="IS4 e-value= 9.9e-07 complete sequence hit  
 coverage= 100%, between model( 486 aa) positions 1; 486  
 length is 376aa with 117 gaps, 0 stops, absolute frame=  
 Plus2"  
 CDS 2631026..2631439  
 /colour="255 0 0"  
 /evidence=predicted  
 /translation="GRQRFNVLGALNAVTS---ITNHTYINSHSMCLLLAKLALLDPV  
 I--PISVILDNARYQKCQLVTDFAEIVD--IELVYLPSSPHLNLIERLWRFVRKECL  
 YSKYYSDFHFSFGAIIQOCIDQCNTTEHKAKLTSLLSLKFQSFQK"  
 /note="IS630 e-value= 1.1e-17 fragment hit coverage=  
 38.56%, between model( 376 aa) positions 232; 376 length  
 is 138aa with 7 gaps, 0 stops, absolute frame= Plus2"  
 CDS 2714843..2715040  
 /colour="255 0 0"  
 /evidence=predicted  
 /translation="GKHKQILLVLDGAGWHTC---KNRVVPPG--IHLKILPPYSPEL  
 QPAERLWRLADEPLAN-QCFETLDDLED"  
 /note="IS630 e-value= 1.4e-09 fragment hit coverage=  
 19.15%, between model( 376 aa) positions 275; 346 length  
 is 66aa with 6 gaps, 0 stops, absolute frame= Plus2"  
 CDS 2845484..2846386  
 /colour="255 0 0"  
 /evidence=predicted  
 /translation="QRFIQGLSPETIHLLSRIHRHSYHHQVRQRAHCILLSFEGFNVT  
 ELMSIFAVTRKTVYTWLDDWDNHC---LVGLYDQPGRGRKPKLNDVQ-KEQIRAWAKM  
 TP-----HNLNAVLAKEAWNIAVSKTTLKRILKSCSMSWRRLRRVAGQPD  
 VEYETK-----RHQLEVLKRQEEKGELdlrYLDESGFCLVPYVPY-AWQEKG-----  
 -----ETLGLPSQRSSRFNVLGLMNRHNDL-TSYVFDKSITSAVVVACIDDFSRT  
 C--DQHTVVVMDQASVHKNAEIEEKIEDWKakNVEIFWLPTYSPHLNLIEIFWRFMKY  
 EWI"  
 /note="IS630 e-value= 1.1e-24 fragment hit coverage=  
 88.56%, between model( 376 aa) positions 1; 333 length is  
 301aa with 36 gaps, 0 stops, absolute frame= Plus2"  
 CDS 2845484..2846518  
 /colour="255 0 0"

```

/evidence=predicted
/translation="QRFIQGLSPETIHLLSRIHRHSYHHQVRQRAHCILLSFEGFNVT
ELMSIFAVTRKTVYTWLDDWDNHC---LVGLYDQPGRGRKPKLNDVQ-KEQIRAWAKM
TP-----HNLNAVLAKEAWNIIVSKTTLKRILKSCSMSWRRLRRRVAGQPD
VEYETK-----RHQLEVLKRQEEKGELdlrYLDESGFCLVPYPY-AWQEKG-----
-----ETLGLPSQRSSRFNVLGLMNRHNDL-TSYVFDKSI SAVVACIDDFSRT
C--DQHTVVVMDQASVHKNAEIEEKIEDWKAKNVEIFWLPTYSPHLNLI EIFWRFMKY
EWIEFAAYKCLGSLSLYIDKILKGFgKDYVIDFGXVLINFXLTTQLL"
/note="IS630 e-value= 5.3e-21 complete sequence hit
coverage= 100%, between model( 376 aa) positions 1; 376
length is 345aa with 36 gaps, 2 stops, absolute frame=
Plus2"
CDS 3258380..3259537
/colour="255 0 0"
/evidence=predicted
/translation="SSNSFRAKTPSIXKVG-ILNSNHQIT-----FHVSTQVF
ACCPVCNQITHRVHSRYERTLRDLPCVDFCLTILLQVCKFFCRNeACKRCIFTErLpk
vaVPWARKTIRFAEHLTSIGLALGGAAAARLSYQINYGSSRNT----MLRSIAKLEPP
-PAPTPKILGVDDFAFQRG--HHYGTILVDLEHH----RTIALLPDRDAKTLVWLEE
HP-----GVEILSRDRSKTYKSAISEGAPNAIQVADR FHLLKNLQEVLEKVF-----
-----HSNYPALKSVDAALLKS-EVPEPHAPESNEKSKVP-PDE
QgPRsRAH-----RLNNYQOTHALKQOGYXVTDIAHHLGIAKRtAYQ-YLSHPFFPEH
QPYTRKVPTVIEP-YKDY-----LYQEWMagRONSyCTK-----YRdALIGHK
SIKCVKtNDLD"
/note="ISL3 e-value= 4e-07 complete sequence hit
coverage= 100%, between model( 451 aa) positions 1; 451
length is 386aa with 75 gaps, 2 stops, absolute frame=
Plus2"
CDS 3258827..3259108
/colour="255 0 0"
/evidence=predicted
/translation="TPKILGVDDFAFQRG--HHYGTILVDLEHH----RTIALLPDRD
AKTLVWLEEHP-----GVEILSRDRSKTYKSAISEGAPNAIQVADR FHLLKNLQEV
LEKV"
/note="ISL3 e-value= 1.4e-18 fragment hit coverage=
23.50%, between model( 451 aa) positions 157; 262 length
is 94aa with 12 gaps, 0 stops, absolute frame= Plus2"
CDS 3307874..3309085
/colour="255 0 0"
/evidence=predicted
/translation="DELIGENPQPEdiLGESGLLKRLSKRLVERALAGELTHHLQOSS
NDQS-GDeNSNGPRNSRNGYSKKTVOSEQG-EMDLSIPDRCG-EFEPVLVPGQORRI
A-GLDEKIIALYARGMTTRDIRAQLVELYG--ANISEALISDVTNSVMEEVKDWRSRP
LDEV--YPIVYLDALYVNIKVNQVSKRAVYVALAVTVEGNKELLGLWIGAAerEGAK
FWLSVLTDLKNRGTQDILIACCDGLKGFQAIESVYPQTQVQVCIVHLIRNSLRHVPW
KESRAVAADLKPIYQAATLE-ESEAALDAFAH-KWDETYPGISQIWIrhWDNVAPLFQ
YPMAIRKVIYTTNAIESLNRSLRKVIKtKAVFPNEESVYKLMFLAMRNISKR-WTRPI
LNWKAALSHFaiLFPtRFNYXIH"
/note="IS256 e-value= 1.4e-166 complete sequence hit
coverage= 100%, between model( 410 aa) positions 1; 410
length is 404aa with 11 gaps, 1 stops, absolute frame=
Plus2"
CDS 3307874..3309085
/colour="255 0 0"
/evidence=predicted
/translation="DELIGENPQPEdiLGESGLLKRLSKRLVERALAGELTHHLQOSS
NDQS-GDeNSNGPRNSRNGYSKKTVOSEQG-EMDLSIPDRCG-EFEPVLVPGQORRI
A-GLDEKIIALYARGMTTRDIRAQLVELYG--ANISEALISDVTNSVMEEVKDWRSRP
LDEV--YPIVYLDALYVNIKVNQVSKRAVYVALAVTVEGNKELLGLWIGAAerEGAK
FWLSVLTDLKNRGTQDILIACCDGLKGFQAIESVYPQTQVQVCIVHLIRNSLRHVPW

```

KESRAVAADLKPIYQAATLE-ESEAALDAFAH-KWDETYPGISQIWIRHWDNVAPLFO  
 YPMAIRKVIYTTNAIESLNRSLRKKVIKTKAVFPNEESVYKLMFLAMRNISKR-WTRPI  
 LNWKAAALSHFAILFPTRFNXYIH"  
 /note="IS256 e-value= 3.7e-167 complete sequence hit  
 coverage= 100%, between model( 410 aa) positions 1; 410  
 length is 404aa with 11 gaps, 1 stops, absolute frame=  
 Plus2"  
 CDS 3753371..3754582  
 /colour="255 0 0"  
 /evidence=predicted  
 /translation="DELIGENPOPEdiLGESGLLKRLSKRLVERALAGELTHHLQOSS  
 NDQS-GDeNSNGPRNSRNGYSKKTVOSEQG-EMDLSIPDRCG-EFEPVLVPGQORRI  
 A-GLDEKI IALYARGMTRDIRAQLVELYG--ANISEALISDVTNSVMEEVKDWRSRP  
 LDEV--YPIVYLDALYVNIKVNGOVSKRAVYVALAVTVEGNKELLGLWIGAAerEGAK  
 FWLSVLTDLKNRGTQDILIAACCDGLKGFPOAIESVYPQTOVQVCIVHLIRNSLRHVPW  
 KESRAVAADLKPIYQAATLE-ESEAALDAFAH-KWDETYPGISQIWIRHWDNVAPLFO  
 YPMAIRKVIYTTNAIESLNRSLRKKVIKTKAVFPNEESVYKLMFLAMRNISKR-WTRPI  
 LNWKAAALSHFAILFPTRFNXYIH"  
 /note="IS256 e-value= 1.4e-166 complete sequence hit  
 coverage= 100%, between model( 410 aa) positions 1; 410  
 length is 404aa with 11 gaps, 1 stops, absolute frame=  
 Plus2"  
 CDS 3753371..3754582  
 /colour="255 0 0"  
 /evidence=predicted  
 /translation="DELIGENPOPEdiLGESGLLKRLSKRLVERALAGELTHHLQOSS  
 NDQS-GDeNSNGPRNSRNGYSKKTVOSEQG-EMDLSIPDRCG-EFEPVLVPGQORRI  
 A-GLDEKI IALYARGMTRDIRAQLVELYG--ANISEALISDVTNSVMEEVKDWRSRP  
 LDEV--YPIVYLDALYVNIKVNGOVSKRAVYVALAVTVEGNKELLGLWIGAAerEGAK  
 FWLSVLTDLKNRGTQDILIAACCDGLKGFPOAIESVYPQTOVQVCIVHLIRNSLRHVPW  
 KESRAVAADLKPIYQAATLE-ESEAALDAFAH-KWDETYPGISQIWIRHWDNVAPLFO  
 YPMAIRKVIYTTNAIESLNRSLRKKVIKTKAVFPNEESVYKLMFLAMRNISKR-WTRPI  
 LNWKAAALSHFAILFPTRFNXYIH"  
 /note="IS256 e-value= 3.7e-167 complete sequence hit  
 coverage= 100%, between model( 410 aa) positions 1; 410  
 length is 404aa with 11 gaps, 1 stops, absolute frame=  
 Plus2"  
 CDS 3911570..3912511  
 /colour="255 0 0"  
 /evidence=predicted  
 /translation="TKNRXPMSYQIRNWSEYNAGLKQRGSVTFWLEQS--AIVHWLET  
 TPRQKRGASLTYSDTAISTFETVKCIYGLAGRQTEGFLNSLFELMGIELPVC DHSTVS  
 RRKGQLSISLPVIPKQGAIHVVIDSTGVKQVY-----EGEWKTRQHGVS-K  
 RRTWRKLHLSVDESTGEILTGVVTTNDVQDGEVFEDLLEGIDD-----EIEQVSAD-G  
 AYDQSHCYDALMERNATAAIPPRKNA-----KIWQHGN--NApphpRDQ  
 NLRAIRKQGRKRWKKQAHYHRRSLAETTMFRFKTIFGGQVRSRNFNDQATELLLOCAA  
 LN-RMIQIAKPETVWVE"  
 /note="IS5\_IS903 e-value= 1.1e-96 complete sequence hit  
 coverage= 100%, between model( 347 aa) positions 1; 347  
 length is 314aa with 37 gaps, 1 stops, absolute frame=  
 Plus2"  
 CDS 3911570..3912511  
 /colour="255 0 0"  
 /evidence=predicted  
 /translation="TKNRXPMSYQIRNWSEYNAGLKQRGSVTFWLEQS--AIVHWLET  
 TPRQKRGASLTYSDTAISTFETVKCIYGLAGRQTEGFLNSLFELMGIELPVC DHSTVS  
 RRKGQLSISLPVIPKQGAIHVVIDSTGVKQVY-----EGEWKTRQHGVS-K  
 RRTWRKLHLSVDESTGEILTGVVTTNDVQDGEVFEDLLEGIDD-----EIEQVSAD-G  
 AYDQSHCYDALMERNATAAIPPRKNA-----KIWQHGN--NApphpRDQ  
 NLRAIRKQGRKRWKKQAHYHRRSLAETTMFRFKTIFGGQVRSRNFNDQATELLLOCAA

LN-RMIQIAKPETVWVE"  
 /note="IS5\_IS903 e-value= 2.2e-96 complete sequence hit  
 coverage= 100%, between model( 347 aa) positions 1; 347  
 length is 314aa with 37 gaps, 1 stops, absolute frame=  
 Plus2"

CDS 4126139..4127350  
 /colour="255 0 0"  
 /evidence=predicted  
 /translation="DELIGENPQPEdiLGESGLLKRLSKRLVERALAGELTHHLQOSS  
 NDQS-GDeNSNGPRNSRNGYSKKTQSEQG-EMDLSIPDRCG-EFEPVLVPGQORRI  
 A-GLDEKIIALYARGMTTRDIRAQLVELYG--ANISEALISDVTNSVMEEVKDWRSRP  
 LDEV--YPIVYLDALYVNIKVNGQVSKRAVYVALAVTVEGNKELLGLWIGAAerEGAK  
 FWLSVLTDLKNRGTQDILIAACDGLKGFPOAIESVYPQTVQVCIVHLIRNSLRHVPW  
 KESRAVAADLKPIYQAATLE-ESEAALDAFAH-KWDETYPGISQIWIRHWDNVAPLFO  
 YPMAIRKVIYTTNAIESLNRSLRKVIKTKAVFPNEESVYKLMFLAMRNISKR-WTRPI  
 LNWKAAALSHFAILFPTRFNXYIH"  
 /note="IS256 e-value= 1.4e-166 complete sequence hit  
 coverage= 100%, between model( 410 aa) positions 1; 410  
 length is 404aa with 11 gaps, 1 stops, absolute frame=  
 Plus2"

CDS 4126139..4127350  
 /colour="255 0 0"  
 /evidence=predicted  
 /translation="DELIGENPQPEdiLGESGLLKRLSKRLVERALAGELTHHLQOSS  
 NDQS-GDeNSNGPRNSRNGYSKKTQSEQG-EMDLSIPDRCG-EFEPVLVPGQORRI  
 A-GLDEKIIALYARGMTTRDIRAQLVELYG--ANISEALISDVTNSVMEEVKDWRSRP  
 LDEV--YPIVYLDALYVNIKVNGQVSKRAVYVALAVTVEGNKELLGLWIGAAerEGAK  
 FWLSVLTDLKNRGTQDILIAACDGLKGFPOAIESVYPQTVQVCIVHLIRNSLRHVPW  
 KESRAVAADLKPIYQAATLE-ESEAALDAFAH-KWDETYPGISQIWIRHWDNVAPLFO  
 YPMAIRKVIYTTNAIESLNRSLRKVIKTKAVFPNEESVYKLMFLAMRNISKR-WTRPI  
 LNWKAAALSHFAILFPTRFNXYIH"  
 /note="IS256 e-value= 3.7e-167 complete sequence hit  
 coverage= 100%, between model( 410 aa) positions 1; 410  
 length is 404aa with 11 gaps, 1 stops, absolute frame=  
 Plus2"

CDS 4199279..4199470  
 /colour="255 0 0"  
 /evidence=predicted  
 /translation="ATPIELSQQQHHCLLQIVRQTINPYRLVRRASIILSAASGKSNT  
 QISRQWQLDRNQVRYWRQRW"  
 /note="IS630 e-value= 8.9e-08 fragment hit coverage=  
 17.02%, between model( 376 aa) positions 1; 64 length is  
 64aa with 0 gaps, 0 stops, absolute frame= Plus2"

CDS 4226972..4227316  
 /colour="255 0 0"  
 /evidence=predicted  
 /translation="KYIVTLTPEERSELIQLTRRRTLSARKMKRAQIIMLADEGHKDD  
 TITQMLNAGISTVHRTRQKFVEGG---VEFALNERPRPGGQKKLDSKAEALLIATACS  
 DPPTG----CCRWTMQLLAE"  
 /note="IS630 e-value= 1.2e-15 fragment hit coverage=  
 32.18%, between model( 376 aa) positions 1; 121 length is  
 115aa with 7 gaps, 0 stops, absolute frame= Plus2"

CDS 4926788..4927030  
 /colour="255 0 0"  
 /evidence=predicted  
 /translation="VKLAELIPWESFESEYADQFSQ---TMGAPAKPFRVALGTLLIK  
 EKLGISDAETVEQIRENPYLOYFLGFSEYRESAPFDASML"  
 /note="IS5\_IS5 e-value= 2.6e-06 fragment hit coverage=  
 19.91%, between model( 422 aa) positions 23; 106 length  
 is 81aa with 3 gaps, 0 stops, absolute frame= Plus2"

CDS 5053775..5054902  
/colour="255 0 0"  
/evidence=predicted  
/translation="PFASIIIEHFSDLDDPRAAHRIEYSLEDIIFITLCAVLGADNWW  
EVANYGCSKAQWLKQWIALPNG-----IPSHDTFEWVVFARLKPQQLQOCFLNWTQAI  
YHLSAGA-LIAIDGKTLRGAIATGEQRSLIHMVSAWASHNRLVLGQRTVEEKSNEITA  
IPELLKILELEG-ALVSIIDAMGCQTATAETIIEGQG-DYVLALKGNQGDLYNDVVQLF  
dhaCQTQFQIEHDSYQTVKKGHGRIEHRTYWTMGQTDYLLGAE-RWAQLKSIGCVES  
CRRQPGHPG---TLQRRYYLLSIESDAQR---FADAVRSHWGIENQLHWILDVGFRED  
KLRACQGYSAQNLSVIRHIAANLLQQESTAKCGVKAKRLKAGWDDDDYLVKILSAAAKG  
"  
/note="ISAs1 e-value= 1.9e-150 complete sequence hit  
coverage= 100%, between model( 389 aa) positions 1; 389  
length is 376aa with 16 gaps, 0 stops, absolute frame=  
Plus2"

CDS 5053775..5054902  
/colour="255 0 0"  
/evidence=predicted  
/translation="PFASIIIEHFSDLDDPRAAHRIEYSLEDIIFITLCAVLGADNWW  
EVANYGCSKAQWLKQWIALPNG-----IPSHDTFEWVVFARLKPQQLQOCFLNWTQAI  
YHLSAGA-LIAIDGKTLRGAIATGEQRSLIHMVSAWASHNRLVLGQRTVEEKSNEITA  
IPELLKILELEG-ALVSIIDAMGCQTATAETIIEGQG-DYVLALKGNQGDLYNDVVQLF  
dhaCQTQFQIEHDSYQTVKKGHGRIEHRTYWTMGQTDYLLGAE-RWAQLKSIGCVES  
CRRQPGHPG---TLQRRYYLLSIESDAQR---FADAVRSHWGIENQLHWILDVGFRED  
KLRACQGYSAQNLSVIRHIAANLLQQESTAKCGVKAKRLKAGWDDDDYLVKILSAAAKG  
"  
/note="ISAs1 e-value= 1.5e-144 complete sequence hit  
coverage= 100%, between model( 389 aa) positions 1; 389  
length is 376aa with 16 gaps, 0 stops, absolute frame=  
Plus2"

CDS 5055743..5055940  
/colour="255 0 0"  
/evidence=predicted  
/translation="ASPIELSQQQHHCLTQIVRQTTNPYRLVRRASIILSAAGESNT  
QISRQWQLDRNQVRYWRQRWLD"  
/note="IS630 e-value= 4e-07 fragment hit coverage=  
17.55%, between model( 376 aa) positions 1; 66 length is  
66aa with 0 gaps, 0 stops, absolute frame= Plus2"

CDS 5176034..5176441  
/colour="255 0 0"  
/evidence=predicted  
/translation="MLLVRPISTESLRLRHRIYHSSRHHQVRQRAHCLILFAQGWPPY  
TLASLFSVSPKTVYNWLKAWNNRG---FAGLYNHPPGRGRKPMFNPDQQQQIYEWTOA  
SPIQ-----LNQVLAQIEQQWSVRVSKATVKRVLKQMDMSWHR"  
/note="IS630 e-value= 8.7e-15 fragment hit coverage=  
39.63%, between model( 376 aa) positions 1; 149 length is  
136aa with 13 gaps, 0 stops, absolute frame= Plus2"

CDS 5176094..5176432  
/colour="255 0 0"  
/evidence=predicted  
/translation="SSRHHQVRQRAHCLILFAQGWPPYTLASLFSVSPKTVYNWLKAW  
NNRGFAGLYNH---PGRGRKPMFNPDQQQQIYEWTOASPIQLNQVLAQIEQQWSVR--  
-VSKATVKRVLKQMDMS"  
/note="IS481 e-value= 3.5e-09 fragment hit coverage=  
33.62%, between model( 351 aa) positions 1; 118 length is  
113aa with 6 gaps, 0 stops, absolute frame= Plus2"

CDS 5341466..5341705  
/colour="255 0 0"  
/evidence=predicted  
/translation="RNQQHYIRQLTAIKLLNEGHSRTQVSEQVGCSDTLTRWMDKY

LDGGLOGLVQPI--RHQKPSRLSPREEQQQLKEMVLTQR"  
 /note="IS481 e-value= 1.2e-07 fragment hit coverage=  
 23.36%, between model( 351 aa) positions 1; 82 length is  
 80aa with 2 gaps, 0 stops, absolute frame= Plus2"  
 CDS 5341493..5341900  
 /colour="255 0 0"  
 /evidence=predicted  
 /translation="RLTAIKLLNEGHSRTQVSEQVGCSDTLTRWMDKYLDGG--LQ  
 GLVQPIRHQKPSRLSPREEQQQLKEMVLTQRPTDYGIDRNMWTGAILAVVIEQRFEVQL  
 KDSRIYELLSELGLSYQRAHRDYA--NADLNAQKEWVAA"  
 /note="IS630 e-value= 1.9e-29 fragment hit coverage=  
 37.50%, between model( 376 aa) positions 30; 170 length  
 is 136aa with 5 gaps, 0 stops, absolute frame= Plus2"  
 CDS 5545037..5545732  
 /colour="255 0 0"  
 /evidence=predicted  
 /translation="FKHLHLGMIInDIKRKSLPAIARAVGLENHQSLHHFLSESPWVAS  
 hLSDkSLDIILKILDGRRLILLID-----ETGDCKKGKSTDYVVKR  
 QYIGNVGGKKEGIvAVTAYGLFQGMILPLSFEVYKPR-----ErLKEGDEYLSK  
 PQIAAGMIRQLQGMGFCELVADSLYGAAQTNFVNVLEELKLPYILAIRSNHAVWLP  
 AEQAVFAEPWQSFERTFSNGTTETRYrQEIIYGqrhhQKRY"  
 /note="IS4 e-value= 2.3e-13 fragment hit coverage=  
 51.23%, between model( 486 aa) positions 1; 249 length is  
 232aa with 27 gaps, 0 stops, absolute frame= Plus2"  
 CDS 5545037..5546200  
 /colour="255 0 0"  
 /evidence=predicted  
 /translation="FKHLHLGMIInDIKRKSLPAIARAVGLENHQSLHHFLSESPWVAS  
 hLSDkSLDIILKILDGRRLILLID-----ETGDCKKGKSTDYVVKR  
 QYIGNVGGKKEGIvAVTAYGLFQGMILPLSFEVYKPR-----ErLKEGDEYLSK  
 PQIAAGMIRQLQGMGFCELVADSLYGAAQTNFVNVLEELKLPYILAIRSNHAVWLP  
 AEQAVFAEPWQSFERTFSNGT-----TETRYR  
 QEIIYGQRHHQKRYWLLTTDPQTLPENSTS-----YVMAA  
 APE----IKLDEIGDCYGFRTWIEYGLKQSKD-TLGWADFRMTHYEQIEKWWEIVMSA  
 FLMVSLFADVFNDSCP-----VANQHFaQHPWWDNONGWKNLLNNV  
 RLIIQPLISWNLKSWLE--VFPIRALKKGFEQLTSKMEAFCC"  
 /note="IS4 e-value= 1.2e-06 complete sequence hit  
 coverage= 100%, between model( 486 aa) positions 1; 486  
 length is 388aa with 105 gaps, 0 stops, absolute frame=  
 Plus2"  
 CDS 5653406..5653864  
 /colour="255 0 0"  
 /evidence=predicted  
 /translation="MTHRKLSHSVWECKYHVVFVPKYRKGRITYGQIRXNSGDIFH-EL  
 ARHKKNVIEEGHLMVDHVMLLSIPLKYSVSNVVGKSAIYIARELGNSRNA-TG  
 HKFWSRGYFVSTVG-RDEAMIRRYIRHQGQEEQKLEQLNLFraXPKSPLRGSNS"  
 /note="IS200 e-value= 6.3e-51 complete sequence hit  
 coverage= 100%, between model( 154 aa) positions 1; 154  
 length is 153aa with 3 gaps, 2 stops, absolute frame=  
 Plus2"  
 CDS 5653406..5653864  
 /colour="255 0 0"  
 /evidence=predicted  
 /translation="MTHRKLSHSVWECKYHVVFVPKYRKGRITYGQIRXNSGDIFH-EL  
 ARHKKNVIEEGHLMVDHVMLLSIPLKYSVSNVVGKSAIYIARELGNSRNA-TG  
 HKFWSRGYFVSTVG-RDEAMIRRYIRHQGQEEQKLEQLNLFraXPKSPLRGSNS"  
 /note="IS200 e-value= 5.1e-50 complete sequence hit  
 coverage= 100%, between model( 154 aa) positions 1; 154  
 length is 153aa with 3 gaps, 2 stops, absolute frame=  
 Plus2"

CDS 5653406..5653861  
/colour="255 0 0"  
/evidence=predicted  
/translation="MTHRKLSHVSWECKYHVVFVVKYRKGRIYGO-IRXNSGDIFHEL  
ARHKKNVIEEGHLMPPDHVHMLLSIPLKYSVSNVVGYVKGKSAIYIARELGNSRNA-TG  
HKFWSRGYFVSTVG-RDEAMIRRYIRHQEQEEQKLEQLNLfrAXPKSPLRGSN"  
/note="IS200\_IS605 e-value= 2.2e-50 complete sequence hit  
coverage= 100%, between model( 153 aa) positions 1; 153  
length is 152aa with 3 gaps, 2 stops, absolute frame=  
Plus2"

CDS 5653406..5653861  
/colour="255 0 0"  
/evidence=predicted  
/translation="MTHRKLSHVSWECKYHVVFVVKYRKGRIYGO-IRXNSGDIFHEL  
ARHKKNVIEEGHLMPPDHVHMLLSIPLKYSVSNVVGYVKGKSAIYIARELGNSRNA-TG  
HKFWSRGYFVSTVG-RDEAMIRRYIRHQEQEEQKLEQLNLfrAXPKSPLRGSN"  
/note="IS200\_IS605 e-value= 5.6e-51 complete sequence hit  
coverage= 100%, between model( 153 aa) positions 1; 153  
length is 152aa with 3 gaps, 2 stops, absolute frame=  
Plus2"

CDS 5653406..5653861  
/colour="255 0 0"  
/evidence=predicted  
/translation="-MTHRKLSHVSWECKYHVVFVVKYRKGRIYGOIRXNSGDIFHEL  
ARHKKNVIEEGHLMPPDHVHMLLSIPLKYSVSNVVGYVKGKSAIYIARELGNSRN-ATG  
HKFWSRGYFVSTVGRDEAMIRRYIRHQEQEEQKLEQLNLfrAXPKSPLRGSN"  
/note="IS605 e-value= 6.9e-45 complete sequence hit  
coverage= 100%, between model( 152 aa) positions 1; 152  
length is 152aa with 2 gaps, 2 stops, absolute frame=  
Plus2"

CDS 5653406..5653861  
/colour="255 0 0"  
/evidence=predicted  
/translation="-MTHRKLSHVSWECKYHVVFVVKYRKGRIYGOIRXNSGDIFHEL  
ARHKKNVIEEGHLMPPDHVHMLLSIPLKYSVSNVVGYVKGKSAIYIARELGNSRN-ATG  
HKFWSRGYFVSTVGRDEAMIRRYIRHQEQEEQKLEQLNLfrAXPKSPLRGSN"  
/note="IS605 e-value= 8.2e-45 complete sequence hit  
coverage= 100%, between model( 152 aa) positions 1; 152  
length is 152aa with 2 gaps, 2 stops, absolute frame=  
Plus2"

CDS 5747213..5747476  
/colour="255 0 0"  
/evidence=predicted  
/translation="LFYFLMQCPLCGHPK-THKHGKTSKGSQRYRCPHCQQTFS-EtF  
DTLCYRRQISPETIQITILQAHVEGSSLRGLSRITGVAYNTCVSVVR"  
/note="IS1\_ORF1 e-value= 1.7e-15 fragment hit coverage=  
36.40%, between model( 239 aa) positions 1; 87 length is  
88aa with 2 gaps, 0 stops, absolute frame= Plus2"

CDS 5896091..5896333  
/colour="255 0 0"  
/evidence=predicted  
/translation="VKLAELIPWESFESEYADQFSQ---TMGAPAKPFRVALGTLIIK  
EKLGISDAETVEQIRENPYLQYFLGFSEYRESAPFDASML"  
/note="IS5\_IS5 e-value= 2.6e-06 fragment hit coverage=  
19.91%, between model( 422 aa) positions 23; 106 length  
is 81aa with 3 gaps, 0 stops, absolute frame= Plus2"

CDS 5908769..5909158  
/colour="255 0 0"  
/evidence=predicted  
/translation="FFMDESGFSLVPCIPY-GWQPIG-----TYL-EIPT

RSSKRLNVLGFLSRROGL--HAYTSEQTITSEVVShCIDTFFADV--ELPTVIVVDQA  
 PIHTS<sub>Q</sub>siyEMKAWEAERG--ITLFELPSYSPHLNLIERLWQFMKYQWI"  
 /note="IS630 e-value= 6.5e-11 fragment hit coverage=  
 39.10%, between model( 376 aa) positions 187; 333 length  
 is 130aa with 21 gaps, 0 stops, absolute frame= Plus2"  
 CDS 5942117..5942839  
 /colour="255 0 0"  
 /evidence=predicted  
 /translation="----MAHLSPEsfXCRATSEVVPSRST-----ISGPSILa  
 risdLFPHCWRLGSLXIN---GLPYSPpGRDRS-----DELRTLp----PTRQETSNT  
 RIXAAXCCRDGCDXDTDXTS<sub>p</sub>KRTKSVLFRKKRHTLKCQIIADRNTLEVICLSFGPG  
 RRHDFQIFKGS<sub>GI</sub>HIHPNTEslQDSGYQGIAAYHANSYVPFKKpQHGEltSLQREYnc  
 ALSQERM<sub>GI</sub>EHINrSLKISRILSERYRNRRCRYALRCNLIAALYNHEL"  
 /note="IS5\_ISL2 e-value= 1e-38 complete sequence hit  
 coverage= 100%, between model( 260 aa) positions 1; 260  
 length is 241aa with 25 gaps, 6 stops, absolute frame=  
 Plus2"  
 CDS 5942438..5942839  
 /colour="255 0 0"  
 /evidence=predicted  
 /translation="KKKRHTLKCQIIADRNTLEVICLSFGpGRRHDFQIFKGS<sub>GI</sub>HIH  
 PNTEslQDSGYQGIAAYHANSYVPFKKpQHGEltSLQREYncALSQERM<sub>GI</sub>EHINrSL  
 KISRILSERYRNRRCRYALRCNLIAALYNHEL"  
 /note="IS5\_ISL2 e-value= 2.1e-57 fragment hit coverage=  
 51.54%, between model( 260 aa) positions 127; 260 length  
 is 134aa with 0 gaps, 0 stops, absolute frame= Plus2"  
 CDS 6104879..6105265  
 /colour="255 0 0"  
 /evidence=predicted  
 /translation="YADESGMDHRDEYDY-AYGPKGE-----RVYA-LKTG-  
 RRSGRVNMIAALRAKQL--MAPFTIEGACNRTVFEIWLercLIPMLKPGQKLVI--DN  
 ATFHKGGRIQELVEKAG--CEVWYLPPYSPDLNKIERSWSWIKSRIR"  
 /note="IS630 e-value= 6.9e-14 fragment hit coverage=  
 38.83%, between model( 376 aa) positions 188; 333 length  
 is 129aa with 20 gaps, 0 stops, absolute frame= Plus2"  
 CDS 6243806..6244048  
 /colour="255 0 0"  
 /evidence=predicted  
 /translation="VKLAELIPWESFESEYADQFSQ---TMGAPAKPFRVALGTIIK  
 EKLGISDAETVEQIRENPYLQYFLGFSEYRESAPFDASML"  
 /note="IS5\_IS5 e-value= 2.6e-06 fragment hit coverage=  
 19.91%, between model( 422 aa) positions 23; 106 length  
 is 81aa with 3 gaps, 0 stops, absolute frame= Plus2"  
 CDS 6501464..6501685  
 /colour="255 0 0"  
 /evidence=predicted  
 /translation="YASDLTAEQWELLEPLIPAAK-----PGGRPRTTDMLSVLNA  
 ILYLVVTGCQWRQLPHDFPCWSTVYSYFRRWRDDGTW"  
 /note="IS5\_IS1031 e-value= 3.3e-39 fragment hit coverage=  
 27.46%, between model( 295 aa) positions 20; 100 length  
 is 74aa with 7 gaps, 0 stops, absolute frame= Plus2"  
 CDS 6501473..6501685  
 /colour="255 0 0"  
 /evidence=predicted  
 /translation="DLTAEQWELLEPLIPAAKP-GGRPRT-TDMLSVLNAILYLVVTG  
 CQWRQLPHDFPCWSTVYSYFRRWRDDGTW"  
 /note="IS5\_IS427 e-value= 7.3e-19 fragment hit coverage=  
 24.66%, between model( 296 aa) positions 125; 197 length  
 is 71aa with 2 gaps, 0 stops, absolute frame= Plus2"  
 CDS 316002..316943



```

/colour="255 0 0"
/evidence=predicted
/translation="TKNRXPMSYQIRNWSEYNAGLKQRGSVTFWLEQS--AIVHWLET
TPRQKRGASLTYSDTAISTFETVKCIYGLAGRQTEGFLNSLFELMGIELPVC DHSTVS
RRKGQLSISLPIPKQGAIHVVIDSTGVKVYG-----EGEWKTRQHGVS-K
RRTWRKLHLSVDESTGEILTGVVTTNDVQDGEVFEDLLEGIDD-----EIEQVSAD-G
AYDQSHCYDALMERNATAAIPPRKNA-----KIWQHGN--NApphpRDQ
NLRAIRKQGRKRWKKQAHYHRRSLAETTMFRFKTIFGGQVRSRNFNDQATELLLOCAA
LN-RMIQIAKPETVWVE"
/note="IS5_IS903 e-value= 1.1e-96 complete sequence hit
coverage= 100%, between model( 347 aa) positions 1; 347
length is 314aa with 37 gaps, 1 stops, absolute frame=
Plus3"
CDS 316002..316943
/colour="255 0 0"
/evidence=predicted
/translation="TKNRXPMSYQIRNWSEYNAGLKQRGSVTFWLEQS--AIVHWLET
TPRQKRGASLTYSDTAISTFETVKCIYGLAGRQTEGFLNSLFELMGIELPVC DHSTVS
RRKGQLSISLPIPKQGAIHVVIDSTGVKVYG-----EGEWKTRQHGVS-K
RRTWRKLHLSVDESTGEILTGVVTTNDVQDGEVFEDLLEGIDD-----EIEQVSAD-G
AYDQSHCYDALMERNATAAIPPRKNA-----KIWQHGN--NApphpRDQ
NLRAIRKQGRKRWKKQAHYHRRSLAETTMFRFKTIFGGQVRSRNFNDQATELLLOCAA
LN-RMIQIAKPETVWVE"
/note="IS5_IS903 e-value= 2.2e-96 complete sequence hit
coverage= 100%, between model( 347 aa) positions 1; 347
length is 314aa with 37 gaps, 1 stops, absolute frame=
Plus3"
CDS 469320..469814
/colour="255 0 0"
/evidence=predicted
/translation="LEKTGIESKKKTYGYR--ERD--ETQR---QAFIERLQTKHP--
HQIVYVDEAGIDNRADYPY-GYCPVG-----QRFYD-LKSG-KRTERVSFIA
ALKEGQL--FSPMTFEGSCNRLLEFAWLQOSLI-SQLQLgdVIVIDNASFHGQRIIE
IVAEAG--CEIWYLPSPDLNKIERWWFVLKN"
/note="IS630 e-value= 3e-16 fragment hit coverage=
50.80%, between model( 376 aa) positions 140; 330 length
is 165aa with 28 gaps, 0 stops, absolute frame= Plus3"
CDS 471168..471305
/colour="255 0 0"
/evidence=predicted
/translation="WQTDGWEGYSRQLPNE---TIHHVSKALTQRLERTNGILRQOAG
RWHRR"
/note="IS1_ORF2 e-value= 3.3e-13 fragment hit coverage=
20.68%, between model( 237 aa) positions 164; 212 length
is 46aa with 3 gaps, 0 stops, absolute frame= Plus3"
CDS 516039..516734
/colour="255 0 0"
/evidence=predicted
/translation="FKHLHLGMI sDIKRKSLPAIARAVGLENHQSLHHLFSESPWVAS
hLSDkRLDIILKILDGRRILLID-----ETGDCKKGKSTDYVKR
QYIGNVGKKENGIVAVTAYGLFQGMILPLSFVYKPR-----ErLKEEDEYLSK
PQIAAGMIRQLQGMGFCELVLADSLYGEAQTNFVNVLEELKLPYILAIRSNHAVWLP
AEQAVFAEPWQSFERTFSNGTTETRYrQEIIYGqrhhQKRY"
/note="IS4 e-value= 4.7e-14 fragment hit coverage=
51.23%, between model( 486 aa) positions 1; 249 length is
232aa with 27 gaps, 0 stops, absolute frame= Plus3"
CDS 516039..517166
/colour="255 0 0"
/evidence=predicted
/translation="FKHLHLGMI sDIKRKSLPAIARAVGLENHQSLHHLFSESPWVAS

```

hLSDkRLDIILKILDGRRLILLID-----ETGDCKKKGKSTDYVVKR  
 QYIGNVGKKENGIvAVTAYGLFQGMILPLSFEVYKPR-----ErLKEEDEYLSK  
 PQIAAGMIRQLQGMGFCFELVLADSLYGEAQTNFVNVLEELKLPYILAIRSNHAVWLP  
 AEQAVFAEPWQSFERTFSNGT-----TETRYR  
 QEIIYGQRHHQKRYWLLTTDPQTLPENSTS-----YVMAA  
 APE----IKLDEIGDCYGFRTWIEYGLKQSKD-TLGWADFRMTHYEQIEKWWEIVMSA  
 FLMVSLFADVFNDSE-----CPVAHQHFAQHPwWDNQNNG  
 WKNLLNNVR--LIIQPLIS----WNLLKRWLEVFPSRALKKGf"  
 /note="IS4 e-value= 9.9e-07 complete sequence hit  
 coverage= 100%, between model( 486 aa) positions 1; 486  
 length is 376aa with 117 gaps, 0 stops, absolute frame=  
 Plus3"  
 CDS 666744..667439  
 /colour="255 0 0"  
 /evidence=predicted  
 /translation="FKHLHLGMI sDIKRKSLPAIARAVGLENHQSLHHLSESPWVAS  
 hLSDkRLDIILKILDGRRLILLID-----ETGDCKKKGKSTDYVVKR  
 QYIGNVGKKENGIvAVTAYGLFQGMILPLSFEVYKPR-----ErLKEEDEYLSK  
 PQIAAGMIRQLQGMGFCFELVLADSLYGEAQTNFVNVLEELKLPYILAIRSNHAVWLP  
 AEQAVFAEPWQSFERTFSNGTTETRYrQEIIYGqrhhQKRY"  
 /note="IS4 e-value= 4.7e-14 fragment hit coverage=  
 51.23%, between model( 486 aa) positions 1; 249 length is  
 232aa with 27 gaps, 0 stops, absolute frame= Plus3"  
 CDS 666744..667871  
 /colour="255 0 0"  
 /evidence=predicted  
 /translation="FKHLHLGMI sDIKRKSLPAIARAVGLENHQSLHHLSESPWVAS  
 hLSDkRLDIILKILDGRRLILLID-----ETGDCKKKGKSTDYVVKR  
 QYIGNVGKKENGIvAVTAYGLFQGMILPLSFEVYKPR-----ErLKEEDEYLSK  
 PQIAAGMIRQLQGMGFCFELVLADSLYGEAQTNFVNVLEELKLPYILAIRSNHAVWLP  
 AEQAVFAEPWQSFERTFSNGT-----TETRYR  
 QEIIYGQRHHQKRYWLLTTDPQTLPENSTS-----YVMAA  
 APE----IKLDEIGDCYGFRTWIEYGLKQSKD-TLGWADFRMTHYEQIEKWWEIVMSA  
 FLMVSLFADVFNDSE-----CPVAHQHFAQHPwWDNQNNG  
 WKNLLNNVR--LIIQPLIS----WNLLKRWLEVFPSRALKKGf"  
 /note="IS4 e-value= 9.9e-07 complete sequence hit  
 coverage= 100%, between model( 486 aa) positions 1; 486  
 length is 376aa with 117 gaps, 0 stops, absolute frame=  
 Plus3"  
 CDS 690405..690542  
 /colour="255 0 0"  
 /evidence=predicted  
 /translation="WQTDGWEgyARQLPDE---VVHEVSKALTQRLERTNGIVRQQTG  
 RWHRR"  
 /note="IS1\_ORF2 e-value= 1.8e-11 fragment hit coverage=  
 20.68%, between model( 237 aa) positions 164; 212 length  
 is 46aa with 3 gaps, 0 stops, absolute frame= Plus3"  
 CDS 972294..973070  
 /colour="255 0 0"  
 /evidence=predicted  
 /translation="PYXXEKAXISLVLEASKNAXISLLSXGwVQAPTTIRIAGLARL  
 IAWA--VCFANPASSXEL--PLYSGSFSLSI-----SKYRTGCLERLFEKXVKL  
 SRYXsvNTQTLDRTXRAMPTAYSDLTTLQWELLEPLIPAAKP--GGRPRT--TDMLSVL  
 NAIFYLVVTGCQWRQLPHDFPCWSTVYSYFRRWRDDGTWSQINEHLRMQVRVSE----  
 -----DRHPSPSAAICDAQSVkvgnpRCHLIGFDGGKM  
 VKGRKRHVLDVTLGLVLMVMVTAANIS"  
 /note="IS5\_IS427 e-value= 8.6e-07 complete sequence hit  
 coverage= 100%, between model( 296 aa) positions 1; 296  
 length is 259aa with 44 gaps, 10 stops, absolute frame=  
 Plus3"

CDS 972543..973412  
/colour="255 0 0"  
/evidence=predicted  
/translation="EKXVKLSRYXSVNTQTLDRTXramptaYDSDLTTLOWELLEPLI  
PAAKPG-----GRPRTDML-----SVLNAlFYLVVTCQWRQ  
--LPHDFPCWSTVYSYFRRWRDDGTWSQINEHLRMQVRVSED---RHSPSAAICDAQ  
SVK-----VGNpRcHLIGFD-----GGKM-  
-----VKGRKRHVLD-TL  
GLVLMVMVTAANISDQRGAK-----ILFWKAQRQGASLSRL  
VR----IWADAGYQGQALMKWVMDRFQYVLEVVKRSDNLAGFQVIPKRWIVERTFGWL  
LWSRRLNKDYEVLTTRTAEALVYVAMIRLMVRRLAQEHX"  
/note="IS5\_IS5 e-value= 1.8e-09 complete sequence hit  
coverage= 100%, between model( 422 aa) positions 1; 422  
length is 290aa with 140 gaps, 4 stops, absolute frame=  
Plus3"

CDS 972582..973433  
/colour="255 0 0"  
/evidence=predicted  
/translation="TQTLDRTXRAM-----PTAYDSDLTTLOWELLEPLIPAAK----  
---PGGRPRTDMLSVLNAlFYLVVTCQWRQLPHDFPCWSTVYSYFRRWRDDGTWSQ  
INEHLRMQVRVSEDRHSPSAAICDAQSVKVG NPRCH-LIGFDGGKMKVGRKRHVLD  
TLGLVLMVMVTAANISDQR-GAKILFWKAQRQGasLSRLVRIWADAGYQGQALMKWV  
DRFQYVLEVVKRSDNLAGFQVIPKRWIVERTFGWLLWSRRLNKDYEVLTTRTAEALVYV  
AMIRLMVRRLAQEHXNFSNSLX"  
/note="IS5\_IS1031 e-value= 1.8e-111 complete sequence hit  
coverage= 100%, between model( 295 aa) positions 1; 295  
length is 284aa with 14 gaps, 3 stops, absolute frame=  
Plus3"

CDS 972624..973433  
/colour="255 0 0"  
/evidence=predicted  
/translation="YDSDLTTLOWELLEPLIPAAK-----PGGRPRTDMLSVLNA  
IFYLVVTCQWRQLPHDFPCWSTVYSYFRRWRDDGTWSQINEHLRMQVRVSEDRHSP  
SAAICDAQSVKVG NPRCH-LIGFDGGKMKVGRKRHVLDTLGLVLMVMVTAANISDQR  
-GAKILFWKAQRQGasLSRLVRIWADAGYQGQALMKWVMDRFQYVLEVVKRSDNLAGF  
QVIPKRWIVERTFGWLLWSRRLNKDYEVLTTRTAEALVYVAMIRLMVRRLAQEHXNFS  
SLX"  
/note="IS5\_IS1031 e-value= 1.2e-113 fragment hit  
coverage= 93.56%, between model( 295 aa) positions 20;  
295 length is 270aa with 9 gaps, 2 stops, absolute frame=  
Plus3"

CDS 972633..972872  
/colour="255 0 0"  
/evidence=predicted  
/translation="DLTTLOWELLEPLIPAAKP-GGRPRT-TDMLSVLNAlFYLVVTC  
CQWRQLPHDFPCWSTVYSYFRRWRDDGTWSQINEHLRM"  
/note="IS5\_IS427 e-value= 2e-19 fragment hit coverage=  
27.70%, between model( 296 aa) positions 125; 206 length  
is 80aa with 2 gaps, 0 stops, absolute frame= Plus3"

CDS 1016775..1017812  
/colour="255 0 0"  
/evidence=predicted  
/translation="PMIKIDFTAEEIQQLNYERYHHPHPRVQRRMEVLYLKSQGLSHT  
QICQLCQISRPTLAKTLRQYQGG---IEGLKTLEYKQPSLLNAHS-DSVRAYFEQH  
PP-----RTSAEAQAVIEQLTGIKRSPTQIKAFKRIKRYKVGYPGKSSLP  
-EKIEEQEFRHTRLEPLleeAQRQERLVFVDAAHFVHRAYLGF-VWCITRI-----  
-----FIPSPS-GRQRFNVLGALDAITKDLVSVTNHTYINSHSMCLLLAKLALL  
DPV-IPISVILDNARYQKCQLVTDFAEIVD--IELVYLPSYSRHLNLIERLWRFVRKE  
CLYSKYADFPFAFKGAIQOCIDQCNGEHKAKLTLLSLKFQSFKK"  
/note="IS630 e-value= 3.1e-22 complete sequence hit"

coverage= 100%, between model( 376 aa) positions 1; 376 length is 346aa with 33 gaps, 0 stops, absolute frame= Plus3"

CDS 1016775..1017812  
/colour="255 0 0"  
/evidence=predicted  
/translation="PMIKIDFTAEEIQQLNYERYHHPHPRVQRRMEVLYLKSQGLSHT  
QICQLCQISRPTLAKTLRQYQGG---IEGLKTLEYKQGQPSLLNAHS-DSVRAYFEQH  
PP-----RTSAEAQAVIEQLTGIKRSPTQIKAFKLRIGCRYRKVGVYVPGKSSLP  
-EKIEEQEQFRHTRLEPLleeAQRQERLVFFVDAAHFVHRAYLGF-VWCITRI-----  
-----FIPSPS-GRQRFNVLGALDAITKDLVSVTNHTYINSHSMCLLLAKLALL  
DPV-IPISVILDNARYQKCQLVTDFAEIVD--IELVYLPSYSRHLNLIERLWRFVVRKE  
CLYSKYADFPFAFKGAIQQCIDQCNGEHKAKLTLLSLKFQSFKK"  
/note="IS630 e-value= 3.5e-21 complete sequence hit  
coverage= 100%, between model( 376 aa) positions 1; 376  
length is 346aa with 33 gaps, 0 stops, absolute frame=  
Plus3"

CDS 1016835..1016993  
/colour="255 0 0"  
/evidence=predicted  
/translation="HHPHPRVQRRMEVLYLKSQGLSHTQICQLCQISRPTLAKTLRQY  
QGGIEGLK"  
/note="IS481 e-value= 3.7e-09 fragment hit coverage=  
15.10%, between model( 351 aa) positions 1; 53 length is  
53aa with 0 gaps, 0 stops, absolute frame= Plus3"

CDS 1099857..1100243  
/colour="255 0 0"  
/evidence=predicted  
/translation="YADESGMDHRDEYDY-AYGPKGE-----RVYA-LKTG-  
RRSGRVNMIAALRAKQL--MAPFTIEGACNRTVFELwLERCLIPvlKPGQKLVI--DN  
ATFHKGQIQELVEKAG--CEVWYLPPYSPDLNKIERSWSWIKSRIR"  
/note="IS630 e-value= 1.1e-13 fragment hit coverage=  
38.83%, between model( 376 aa) positions 188; 333 length  
is 129aa with 20 gaps, 0 stops, absolute frame= Plus3"

CDS 1100496..1101191  
/colour="255 0 0"  
/evidence=predicted  
/translation="FKHLHLGMIIsDIKRKSLPAIARAVGLENHQSLHHLFSESPWVAS  
hLSDkRLDIILKILDGRRLLILLID-----ETGDCKKGKSTDYVKR  
QYIGNVGKKENGIvAVTAYGLFQGMILPLSFEVYKPR-----ErLKEEDEYLSK  
PQIAAGMIRQLQGMGFCELVLADSLYGEAQTNFVNVLEELKLPYILAIRSNHAVWLP  
AEQAVFAEPWQSFERTFSNGTTETRYrQEIIYGqrhhQKRY"  
/note="IS4 e-value= 4.7e-14 fragment hit coverage=  
51.23%, between model( 486 aa) positions 1; 249 length is  
232aa with 27 gaps, 0 stops, absolute frame= Plus3"

CDS 1100496..1101623  
/colour="255 0 0"  
/evidence=predicted  
/translation="FKHLHLGMIIsDIKRKSLPAIARAVGLENHQSLHHLFSESPWVAS  
hLSDkRLDIILKILDGRRLLILLID-----ETGDCKKGKSTDYVKR  
QYIGNVGKKENGIvAVTAYGLFQGMILPLSFEVYKPR-----ErLKEEDEYLSK  
PQIAAGMIRQLQGMGFCELVLADSLYGEAQTNFVNVLEELKLPYILAIRSNHAVWLP  
AEQAVFAEPWQSFERTFSNGT-----TETRYR  
QEIIYGQRHHQKRYWLLTTDPQTLPENSTS-----YVMAA  
APE----IKLDEIGDCYGFRTWIEYGLKQSKD-TLGWADFRMTHYEQIEKWWEIVMSA  
FLMVSLFADVFNDS-----CPVAHQHFAQHPwWDNQNG  
WKNLLNNVR--LIIQPLIS----WNLKRWLEVFPSRALKKGF"  
/note="IS4 e-value= 9.9e-07 complete sequence hit  
coverage= 100%, between model( 486 aa) positions 1; 486  
length is 376aa with 117 gaps, 0 stops, absolute frame=

Plus3"  
CDS 1211556..1212239  
/colour="255 0 0"  
/evidence=predicted  
/translation="LHLXYFRRQYQCGGQHIHKNGHRR-GKQNHICVACGR---QFL  
STYSKRGYsdwTKRLCLRMVYVNGMGLQGIERVIGVAHTTVIRWVQQV--GVLLPDAYD  
PDDIPQVGELDELETFVVGQKRNVVWVWTVVDHFHFGILGWVVDHSAETFRPLWQAIV  
CWQ-CFFWVSDGNPVYPGFIPEG----DQIVSKTYMTRVEGENTRLRHYLARLHRKTL  
CYSKSV DMLKHSIRLLI-HYLKF"  
/note="IS1\_ORF2 e-value= 4.1e-24 complete sequence hit  
coverage= 100%, between model( 237 aa) positions 1; 237  
length is 228aa with 13 gaps, 1 stops, absolute frame=  
Plus3"

CDS 1211586..1212233  
/colour="255 0 0"  
/evidence=predicted  
/translation="QCGGQH-IHKNGHRR-GKQNHICVACGRQFL--STYSKRGYSDW  
TKRLCLRMVYVNGMGLQGIERVIGVAHTTVIRWVQQVGVLLPDAYDPDD-----IP--  
-QVGELDELETFVVGQKRNVVWVW-TVVDHFHFG--ILGWVVDHSAETFRPLWqaIVC  
WQCFWVSDGNPVYpgFIPEgDQIVSKTYMTRVEGENTRLRHYLARLHRKTL CYSKSV  
DMLKHSIRLL---IHYL"  
/note="IS1\_ORF1 e-value= 5.5e-39 fragment hit coverage=  
96.23%, between model( 239 aa) positions 10; 239 length  
is 216aa with 19 gaps, 0 stops, absolute frame= Plus3"

CDS 1211586..1212233  
/colour="255 0 0"  
/evidence=predicted  
/translation="-----QCGGQH-IHKNGHRR-GKQNHICVACGRQFL--ST  
YSKRGYSDWTKRLCLRMVYVNGMGLQGIERVIGVAHTTVIRWVQQVGVLLPDAYDPDD-  
-----IP---QVGELDELETFVVGQKRNVVWVW-TVVDHFHFG--ILGWVVDHSAETF  
RPLWqaIVCWQCFWVSDGNPVYpgFIPEgDQIVSKTYMTRVEGENTRLRHYLARLHR  
KTL CYSKSV DMLKHSIRLL---IHYL"  
/note="IS1\_ORF1 e-value= 5.6e-36 complete sequence hit  
coverage= 100%, between model( 239 aa) positions 1; 239  
length is 216aa with 28 gaps, 0 stops, absolute frame=  
Plus3"

CDS 1211838..1212239  
/colour="255 0 0"  
/evidence=predicted  
/translation="DPDDIPQVGELDELETFVVGQKRNVVWVWTVVDHFHFGILGWVVG  
DHAETFRPLWQAIVCWQ-CFFWVSDGNPVYPGFIPEG----DQIVSKTYMTRVEGEN  
TRLRHYLARLHRKTL CYSKSV DMLKHSIRLLI-HYLKF"  
/note="IS1\_ORF2 e-value= 1.9e-31 fragment hit coverage=  
59.07%, between model( 237 aa) positions 98; 237 length  
is 134aa with 6 gaps, 0 stops, absolute frame= Plus3"

CDS 1474827..1475525  
/colour="255 0 0"  
/evidence=predicted  
/translation="RMAYPSSrSLKCRASSKVVSPXSTIGGSS-----ILAGIS  
DLFPYCWRLGSLXINCLPYCpGRNRSDELRTLSTWSEISATR-----VXATG  
CRCDGCDXNAHXTSPEKTKSVLF----REKKRHTLKCQIIADRNTLEIICLSFGPGRR  
HDFQIFKVSGIHIHPNTESLQDSGYQGIAAYHANSYVPFKKSQHSELTSLOREYNRAL  
SQERMGIEHIK-----SQPEDFQNSVGALPXSSSSLHAAVXL"  
/note="IS5\_ISL2 e-value= 5e-10 complete sequence hit  
coverage= 100%, between model( 260 aa) positions 1; 260  
length is 233aa with 31 gaps, 7 stops, absolute frame=  
Plus3"

CDS 1475154..1475444  
/colour="255 0 0"  
/evidence=predicted

```

/translation="KKRHTLKCQIIADRNTLEIICLSFGPGRRHDFQIFKVSIGIHIHP
NTESLQDSGYQGIAAYHANSYVFPFKKSQHSSELTSLQREYNRALSQERMGIEHI"
/note="IS5_ISL2 e-value= 4.6e-35 fragment hit coverage=
37.31%, between model( 260 aa) positions 128; 224 length
is 97aa with 0 gaps, 0 stops, absolute frame= Plus3"
CDS 1500237..1500374
/colour="255 0 0"
/evidence=predicted
/translation="WQTDGWEGYARQLPDE---VVHEVSKALTQRLERTNGIVRQQTG
RWHRR"
/note="IS1_ORF2 e-value= 1.8e-11 fragment hit coverage=
20.68%, between model( 237 aa) positions 164; 212 length
is 46aa with 3 gaps, 0 stops, absolute frame= Plus3"
CDS 1586793..1587056
/colour="255 0 0"
/evidence=predicted
/translation="LFYFLMQCPLCGHPK-THKHGKTSKGSQRYRCPHCQQTFS-Etf
DTLCYRRQISPETIQITILQAHVEGSSLRGLSRITGVAYNTCVSVVR"
/note="IS1_ORF1 e-value= 1.7e-15 fragment hit coverage=
36.40%, between model( 239 aa) positions 1; 87 length is
88aa with 2 gaps, 0 stops, absolute frame= Plus3"
CDS 2912997..2913938
/colour="255 0 0"
/evidence=predicted
/translation="TKNRXPMSYQIRNWSEYNAGLKQRGSVTFWLEQS--AIVHWLET
TPRQKRGASLTYSDDTAISTFETVKCIYGLAGRQTEGFLNSLFELMGIELPVCDDHSTVS
RRKGQLSISLPLVIPKQGAIHVVVIDSTGVKQVY-----EGEWKTRQHGVS-K
RRTWRKLHLSVDESTGEILTGVVTTNDVQDGEVFEDLLEGIDD-----EIEQVSAD-G
AYDQSHCYDALMERNATAAIPPRKNA-----KIWQHGN--NApphpRDQ
NLRAIRKQGRKRWKKQAHYHRRSLAETTMFRFKTIFGGQVRSRNFNDQATELLLOCAA
LN-RMIQIAKPETVWVE"
/note="IS5_IS903 e-value= 1.1e-96 complete sequence hit
coverage= 100%, between model( 347 aa) positions 1; 347
length is 314aa with 37 gaps, 1 stops, absolute frame=
Plus3"
CDS 2912997..2913938
/colour="255 0 0"
/evidence=predicted
/translation="TKNRXPMSYQIRNWSEYNAGLKQRGSVTFWLEQS--AIVHWLET
TPRQKRGASLTYSDDTAISTFETVKCIYGLAGRQTEGFLNSLFELMGIELPVCDDHSTVS
RRKGQLSISLPLVIPKQGAIHVVVIDSTGVKQVY-----EGEWKTRQHGVS-K
RRTWRKLHLSVDESTGEILTGVVTTNDVQDGEVFEDLLEGIDD-----EIEQVSAD-G
AYDQSHCYDALMERNATAAIPPRKNA-----KIWQHGN--NApphpRDQ
NLRAIRKQGRKRWKKQAHYHRRSLAETTMFRFKTIFGGQVRSRNFNDQATELLLOCAA
LN-RMIQIAKPETVWVE"
/note="IS5_IS903 e-value= 2.2e-96 complete sequence hit
coverage= 100%, between model( 347 aa) positions 1; 347
length is 314aa with 37 gaps, 1 stops, absolute frame=
Plus3"
CDS 2982312..2983067
/colour="255 0 0"
/evidence=predicted
/translation="LQANLQTHAPRMAHLSPKSLXCRATSKVPPRSTIsgpSILARI
SDLFPHCWRLGRFXIN-----GLPYSPAGR---ECSDELRTLP---PTRQETSNTRI
XATXCCRDGCDXDTDXTSKRKTSVLFRRKKRHTLKCQIIANRSTLEIICLNFGKGRR
HDFQIFKVSIGIHIHPNTESLQDSGYQGITAYHSNSYVFPFKKPOHGELTSLQREYNRAL
SQERMGIEHINRSLKIFRILSERYRNRRRRYALRCNLIAALYNHEL"
/note="IS5_ISL2 e-value= 4.5e-45 complete sequence hit
coverage= 100%, between model( 260 aa) positions 1; 260
length is 252aa with 12 gaps, 6 stops, absolute frame=

```

Plus3"  
CDS 2982666..2983067  
/colour="255 0 0"  
/evidence=predicted  
/translation="KKKRHTLKCQIIANRSTLEIICLNFGKGRRHDFQIFKVSIGIHH  
PNTESLQDSGYQGITAYHSNSYVFPFKKPOHGELTSLQREYNRALSQERMGIEHINRSL  
KIFRILSERYRNRRRRYALRCNLIAALYNHEL"  
/note="IS5\_ISL2 e-value= 5.1e-63 fragment hit coverage=  
51.54%, between model( 260 aa) positions 127; 260 length  
is 134aa with 0 gaps, 0 stops, absolute frame= Plus3"

CDS 3307083..3307769  
/colour="255 0 0"  
/evidence=predicted  
/translation="DELIGENPOPEdiLGESGLLKRLSKRLVERALAGELTHHLQOSS  
NDQS-GDeNSNGPRNSRNGYSKKTVOSEQG-EMDLSIPDRCG-EFEPVLVPGQORRI  
A-GLDEKIIALYARGMTTRDIRAQLVELYG--ANISEALISDVTNSVMEEVKDWRSRP  
LDEV--YPIVYLDALYVNIKVNGQVSKRAVYVALAVTVEGNKELLGLWIGAAerEGAK  
FWLSVLTDLKNRGTQDILM"  
/note="IS256 e-value= 1.9e-79 fragment hit coverage=  
56.59%, between model( 410 aa) positions 1; 232 length is  
229aa with 8 gaps, 0 stops, absolute frame= Plus3"

CDS 3307083..3309647  
/colour="255 0 0"  
/evidence=predicted  
/translation="DELIGENPOPEdiLGESGLLKRLSKRLVERALAGELTHHLQOSS  
NDQS-GDeNSNGPRNSRNGYSKKTVOSEQG-EMDLSIPDRCG-EFEPVLVPGQORRI  
A-GLDEKIIALYARGMTTRDIRAQLVELYG--ANISEALISDVTNSVMEEVKDWRSRP  
LDEV--YPIVYLDALYVNIKVNGQVSKRAVYVALAVTVEGNKELLGLWIGAAerEGAK  
FWLSVLTDLKNRGTQDilmgfvrvcrlcrsriqthqetvrclerkklpiesmncxmns  
ertlnrkifwanqdcldsanaxwneplqvnxlitcsnptisqvmrilmapeivamv  
trkrpsslnerkwrtyrflvtvaaslsiswclkasdasqgsmrksspymlgaxppvife  
pnwwscmgpislklxlvtspiaswkrsktgvggrwmrcirlsilrmcmxtsksmvksa  
selsmslwqxlwratrncwdygyxeplnereqnsqfrcsqtlkieelrisxllavmdsk  
vflkrlsrstlrprcrfvlsilfviafamcrgrkvepxlqtsspftkrplwkslrlrw  
mhlpingtrrilalaksgydgimlprcfntqwpsvrlstppmlsrstahxerxlrp  
krfslmkslstnxcfxrxgifrsdgpqdfxigrrrcpillfcsqhdstieytaaytki  
xtlSLIACCDGLKGFPQAIESVYPQTQVQVCIVHLIRNSLRHVPWKESRAVAADLKPI  
YQAATLE-ESEAALDAFAH-KWDETYPGISQIWIHWDNVAPLQYPMAIRKVIYTTN  
AIESLNRSLRKVIKTKAVFPNEESVYKLMFLAMRNISKR-WTRPILNWKAALSHFAIL  
FPTRFNXYXH"  
/note="IS256 e-value= 4.1e-83 complete sequence hit  
coverage= 100%, between model( 410 aa) positions 1; 410  
length is 855aa with 11 gaps, 1 stops, absolute frame=  
Plus3"

CDS 3309117..3309647  
/colour="255 0 0"  
/evidence=predicted  
/translation="LIACCDGLKGFPQAIESVYPQTQVQVCIVHLIRNSLRHVPWKES  
RAVAADLKPIYQAATLE-ESEAALDAFAH-KWDETYPGISQIWIHWDNVAPLQYPM  
AIRKVIYTTNAIESLNRSLRKVIKTKAVFPNEESVYKLMFLAMRNISKR-WTRPILNW  
KAALSHFAILFPTRFNXYXH"  
/note="IS256 e-value= 5.1e-77 fragment hit coverage=  
43.90%, between model( 410 aa) positions 231; 410 length  
is 177aa with 3 gaps, 1 stops, absolute frame= Plus3"

CDS 3315393..3316334  
/colour="255 0 0"  
/evidence=predicted  
/translation="TKNRXPMSYQIRNWSEYNAGLKQGRSVTFWLEQS--AIVHWLET  
TPRQKRGASLTYSDTAISTFETVKCIYGLAGRQTEGFLNSLFELMGIELPVCDDHSTVS  
RRKGQLSISLPVIPKQGAIHVVVIDSTGIKVYG-----EGEWKTRQHGVS-K

```

RRTWRKLHLSVDESTGEILTGVVTTNDVQDGEVFEDLLEGIDD-----EIEQVSAD-G
AYDQSHCYDALMERNATAAIPPRKNA-----KIWQHGN--NApphpRDQ
NLRAIRKQGRKRWKKQAHYHRRSLAETTMFRFKTIFGGQVRSRNFNDQATELLLOCAA
LN-RMIQIAKPETVWVE"
/note="IS5_IS903 e-value= 9.4e-98 complete sequence hit
coverage= 100%, between model( 347 aa) positions 1; 347
length is 314aa with 37 gaps, 1 stops, absolute frame=
Plus3"
CDS 3315393..3316334
/colour="255 0 0"
/evidence=predicted
/translation="TKNRXPMSYQIRNWSEYNAGLKQRGSVTFWLEQS--AIVHWLET
TPRQKRGASLTYSDTAISTFETVKCIYGLAGROTEGFLNSLFELMGIELPVCDDHSTVS
RRKGQLSISLPLVIPKQGAIHVVIDSTGIKVG-----EGEWKTRQHGVS-K
RRTWRKLHLSVDESTGEILTGVVTTNDVQDGEVFEDLLEGIDD-----EIEQVSAD-G
AYDQSHCYDALMERNATAAIPPRKNA-----KIWQHGN--NApphpRDQ
NLRAIRKQGRKRWKKQAHYHRRSLAETTMFRFKTIFGGQVRSRNFNDQATELLLOCAA
LN-RMIQIAKPETVWVE"
/note="IS5_IS903 e-value= 1.7e-97 complete sequence hit
coverage= 100%, between model( 347 aa) positions 1; 347
length is 314aa with 37 gaps, 1 stops, absolute frame=
Plus3"
CDS 3758064..3758450
/colour="255 0 0"
/evidence=predicted
/translation="YADESGMDHRDEYDY-AYGPKGE-----RVYA-LKTG-
RRSGRVNMIAALRAKQL--MAPFTIEGACNRTVFELwLERCLIPvlKPGQKlVI--DN
ATFHKGGOIQELVEKAG--CEVWYLPPYSPDLNKIERSWSWIKSRIR"
/note="IS630 e-value= 1.1e-13 fragment hit coverage=
38.83%, between model( 376 aa) positions 188; 333 length
is 129aa with 20 gaps, 0 stops, absolute frame= Plus3"
CDS 4200300..4200518
/colour="255 0 0"
/evidence=predicted
/translation="RIRFVYIPKHTSXLNQIECWFSILVRRLLIRRGNFTSTDDLQORI
LDFIEYFNHtMAKPFQWQFKGFTPHGXLM"
/note="IS630 e-value= 5.4e-08 fragment hit coverage=
19.15%, between model( 376 aa) positions 305; 376 length
is 73aa with 0 gaps, 2 stops, absolute frame= Plus3"
CDS 4200348..4200458
/colour="255 0 0"
/evidence=predicted
/translation="IECWFSILVRRLLIR--RGNFTSTDDLQORILDFIEYFNH"
/note="IS3_IS150_ORF2 e-value= 4.8e-09 fragment hit
coverage= 10.03%, between model( 389 aa) positions 329;
367 length is 37aa with 2 gaps, 0 stops, absolute frame=
Plus3"
CDS 4250727..4251422
/colour="255 0 0"
/evidence=predicted
/translation="FKHLHLGMIIsDIKRKSLPAIARAVGLENHQSLHHFLSESPWVAS
hLSDkRLDIILKILDGRRLILLID-----ETGDCKKGKSTDYVKR
QYIGNVGKKENGIvAVTAYGLFQGMILPLSFVYKPR-----ErLKEEDEYLSK
PQIAAGMIRQLQGMGFCELVLADSLYGEAQTNFVNVLEELKLPYILAIRSNHAVWLP
AEQAVFAEPWQSFERTFSNGTTETRYrQEIIYGqrhhQKRY"
/note="IS4 e-value= 4.7e-14 fragment hit coverage=
51.23%, between model( 486 aa) positions 1; 249 length is
232aa with 27 gaps, 0 stops, absolute frame= Plus3"
CDS 4250727..4251854
/colour="255 0 0"

```



```

/evidence=predicted
/translation="FKHLHLGMI sDIKRKSLPAIARAVGLENHQSLHHFLSESPWVAS
hLSDkRLDIILKILDGRRLLILLID-----ETGDCKKKGKSTDYVKR
QYIGNVGGKENGIVAVTAYGLFQGMILPLSFVYKPR-----ErLKEEDEYLSK
PQIAAGMIRQLQGMGFCELVLADSLYGEAQTNFVNVLEELKLPYILAIRSNHAVWLP
AEQAVFAEPWQSFERTFSNGT-----TETRYR
QEIIYGQRHHQKRYWLLTTDPQTLPENSTS-----YVMAA
APE----IKLDEIGDCYGFRTWIEYGLKQSKD-TLGWADFRMTHYEQIEKWWEIVMSA
FLMVSLFADVFNDS-----CPVAHQHFAQHPWWDNQNQ
WKNLLNNVR--LIIQPLIS----WNLLKRWLEVFPSRALKKGf"
/note="IS4 e-value= 9.9e-07 complete sequence hit
coverage= 100%, between model( 486 aa) positions 1; 486
length is 376aa with 117 gaps, 0 stops, absolute frame=
Plus3"
CDS 4281402..4281956
/colour="255 0 0"
/evidence=predicted
/translation="HLSKTTQVNPKNQGLNINKVACSSQSW-----NDCLLMPV
SLKFFPLSLXFLLISEYMNSGL-----ISLMPKHKHHLR-----LFFTTYPE
XspACVKQHDTKQRPHEPQA-----VLLSLRXQIKITLX-----
-----RLLYVPLKKPQQGELTPLEXEYNRALSQ
ERMGIEHINRSLKIFRILSERYRSRRLALRCNLIAAIYNYEL"
/note="IS5_ISL2 e-value= 3.9e-10 complete sequence hit
coverage= 100%, between model( 260 aa) positions 1; 260
length is 185aa with 77 gaps, 5 stops, absolute frame=
Plus3"
CDS 4281750..4281956
/colour="255 0 0"
/evidence=predicted
/translation="YVPLKKPQQGELTPLEXEYNRALSQERMGIEHINRSLKIFRILS
ERYRSRRLALRCNLIAAIYNYEL"
/note="IS5_ISL2 e-value= 3.1e-31 fragment hit coverage=
26.54%, between model( 260 aa) positions 192; 260 length
is 69aa with 0 gaps, 1 stops, absolute frame= Plus3"
CDS 5056764..5056982
/colour="255 0 0"
/evidence=predicted
/translation="RIRFVYIPKHTSWLNQIECWFSILVRRLLIRRGNFTSKDDLQORI
LEFIEYFNHtMAKPFQWQFKGFQPRXLXLM"
/note="IS630 e-value= 4e-10 fragment hit coverage=
19.15%, between model( 376 aa) positions 305; 376 length
is 73aa with 0 gaps, 1 stops, absolute frame= Plus3"
CDS 5056812..5056922
/colour="255 0 0"
/evidence=predicted
/translation="IECWFSILVRRLLIR--RGNFTSKDDLQORILEFIEYFNH"
/note="IS3_IS150_ORF2 e-value= 2e-08 fragment hit
coverage= 10.03%, between model( 389 aa) positions 329;
367 length is 37aa with 2 gaps, 0 stops, absolute frame=
Plus3"
CDS 5147340..5148377
/colour="255 0 0"
/evidence=predicted
/translation="PMIKIDFTAEEIQQLNYERYHHHPHPRVQRRMEVLYLKSQGLSHT
QICQLCQISRPTLAKTLRQYQGG---IEGLKTLEYKQPSLLNAHS-DSVRAYFEQH
PP-----RTSAEAQAVIEQLTGIKRSPTQIKAFKLRIGCRYRKVGVYPGKSSLP
-EKIEEQEQFRHTRLEPLleeAQRQERLVFVDAAHFVHRAYLGF-VWCITRI-----
-----FIPSPS-GRQRFNVLGALDAITKDLVSVTNHTYINSHSMCLLLAKLALL
DPV-IPISVILDNARYQKCQLVTDFAEIVD--IELVYLPSYSPHLNLIERLWRFVRKE
CLYSKYYADFPAPKGAIQCIDQCNGEHKAKLTLLSLKQSFKK"

```

```

/note="IS630 e-value= 6.7e-25 complete sequence hit
coverage= 100%, between model( 376 aa) positions 1; 376
length is 346aa with 33 gaps, 0 stops, absolute frame=
Plus3"
CDS 5147340..5148377
/colour="255 0 0"
/evidence=predicted
/translation="PMIKIDFTAEEIQQLNYERYHHPHPRVQRRMEVLYLKSQGLSHT
QICQLCQISRPTLAKTLRQYQGG---IEGLKTLEYKQGQPSLLNAHS-DSVRAYFEQH
PP-----RTSAEAQAVIEQLTGIKRSPTQIKAFKLRIGCRYRKVGVYVPGKSSLP
-EKIEEQEQFRHTRLEPLleeAQRQERLVFFVDAAHFVHRAYLGF-VWCITRI-----
-----FIPSPS-GRQRFNVLGALDAITKDLVSVTNHTYINSHSMCLLLAKLALL
DPV-IPISVILDNARYQKCOLVTDFAEIVD--IELVYLPSYSPHLNLIERLWRFVVRKE
CLYSKYADFPFAFKGAIQQCIDQCNGEHKAKLTLLSLKFQSFKK"
/note="IS630 e-value= 4.9e-24 complete sequence hit
coverage= 100%, between model( 376 aa) positions 1; 376
length is 346aa with 33 gaps, 0 stops, absolute frame=
Plus3"
CDS 5147400..5147558
/colour="255 0 0"
/evidence=predicted
/translation="HHPHPRVQRRMEVLYLKSQGLSHTQICQLCQISRPTLAKTLRQY
QGGIEGLK"
/note="IS481 e-value= 3.7e-09 fragment hit coverage=
15.10%, between model( 351 aa) positions 1; 53 length is
53aa with 0 gaps, 0 stops, absolute frame= Plus3"
CDS 5209563..5210690
/colour="255 0 0"
/evidence=predicted
/translation="PFASIIIEHFSDLDDPRAAHRIEYSLEDIIIIITLCAVLGADNWX
EVANYGRSKAQWLKQWIALPNG-----VPSHDTFEWVVFARLKPQQLQOCFLNWTQAI
YQLSAGE-LIAIDGKTLRGAIAPGECQSLIHMVSAWASHNRLVLGQRTVDEKSNEITA
IPELLKVLELEG-ALVSIIDAMGCQTAIAETIIEGQG-DYVLALKGNQGDLYNDVVQLF
dhaCQTQFQIEHDSYQTVKKGHGRIEHRTYWTMGQTDYLLGAE-RWAQLKSIGCVES
CRRQPGHPG---TLQRRYLLSIESDAQR---FADAVRSHWGIENQLHWILDVGFRED
KLRACQGCQAQNLVIRHIAANLLQQESTAKCGVKAKRLKAGWDDNYLVKILSVAAKG
"
/note="ISAs1 e-value= 2.4e-150 complete sequence hit
coverage= 100%, between model( 389 aa) positions 1; 389
length is 376aa with 16 gaps, 0 stops, absolute frame=
Plus3"
CDS 5209563..5210690
/colour="255 0 0"
/evidence=predicted
/translation="PFASIIIEHFSDLDDPRAAHRIEYSLEDIIIIITLCAVLGADNWX
EVANYGRSKAQWLKQWIALPNG-----VPSHDTFEWVVFARLKPQQLQOCFLNWTQAI
YQLSAGE-LIAIDGKTLRGAIAPGECQSLIHMVSAWASHNRLVLGQRTVDEKSNEITA
IPELLKVLELEG-ALVSIIDAMGCQTAIAETIIEGQG-DYVLALKGNQGDLYNDVVQLF
dhaCQTQFQIEHDSYQTVKKGHGRIEHRTYWTMGQTDYLLGAE-RWAQLKSIGCVES
CRRQPGHPG---TLQRRYLLSIESDAQR---FADAVRSHWGIENQLHWILDVGFRED
KLRACQGCQAQNLVIRHIAANLLQQESTAKCGVKAKRLKAGWDDNYLVKILSVAAKG
"
/note="ISAs1 e-value= 1.8e-144 complete sequence hit
coverage= 100%, between model( 389 aa) positions 1; 389
length is 376aa with 16 gaps, 0 stops, absolute frame=
Plus3"
CDS 5296908..5297147
/colour="255 0 0"
/evidence=predicted
/translation="RNQQHYIRQLTAIKLLNEGHSRTQVSEQVGCSDTLTRWMDKY

```

LDGGLOGLVQPI--RHQKPSRLSPREEQQQLKEMVLTQR"  
 /note="IS481 e-value= 1.2e-07 fragment hit coverage=  
 23.36%, between model( 351 aa) positions 1; 82 length is  
 80aa with 2 gaps, 0 stops, absolute frame= Plus3"  
 CDS 5296935..5297342  
 /colour="255 0 0"  
 /evidence=predicted  
 /translation="RLTAIKLLNEGHSRTQVSEQVGCSDTLTRWMDKYLDGG--LQ  
 GLVQPIRHQKPSRLSPREEQQQLKEMVLTQRPTDYGIDRNMWTGAILAVVIEQRFEVQL  
 KDSRIYELLSELGLSYQRAHRDYA--NADLNAQKEWVAA"  
 /note="IS630 e-value= 1.9e-29 fragment hit coverage=  
 37.50%, between model( 376 aa) positions 30; 170 length  
 is 136aa with 5 gaps, 0 stops, absolute frame= Plus3"  
 CDS 5342181..5342333  
 /colour="255 0 0"  
 /evidence=predicted  
 /translation="QLCLILDNNPTHKG-KMRSQLAIHLEqmgltqsiQVEFLYLPSY  
 SPKLNLVE"  
 /note="IS630 e-value= 4.3e-06 fragment hit coverage=  
 11.70%, between model( 376 aa) positions 279; 322 length  
 is 51aa with 1 gaps, 0 stops, absolute frame= Plus3"  
 CDS 5352645..5353340  
 /colour="255 0 0"  
 /evidence=predicted  
 /translation="FKHLHLGMI sDIKRKSLPAIARAVGLENHQSLHHLFSESPWVAS  
 hLSDkRLDIILKILDGRRLLILLID-----ETGDCKKKGKSTDYVKR  
 QYIGNVGKKENGIvAVTAYGLFQGMILPLSFEVYKPR-----ErLKEEDEYLSK  
 PQIAAGMIRQLQGMGFCFELVLADSLYGEAQTNFVNVLEELKLPYILAIRSNHAVWLP  
 AEQAVFAEPWQSFERTFSNGTTETRYrQEIIYGqrhhQKRY"  
 /note="IS4 e-value= 4.7e-14 fragment hit coverage=  
 51.23%, between model( 486 aa) positions 1; 249 length is  
 232aa with 27 gaps, 0 stops, absolute frame= Plus3"  
 CDS 5352645..5353772  
 /colour="255 0 0"  
 /evidence=predicted  
 /translation="FKHLHLGMI sDIKRKSLPAIARAVGLENHQSLHHLFSESPWVAS  
 hLSDkRLDIILKILDGRRLLILLID-----ETGDCKKKGKSTDYVKR  
 QYIGNVGKKENGIvAVTAYGLFQGMILPLSFEVYKPR-----ErLKEEDEYLSK  
 PQIAAGMIRQLQGMGFCFELVLADSLYGEAQTNFVNVLEELKLPYILAIRSNHAVWLP  
 AEQAVFAEPWQSFERTFSNGT-----TETRYR  
 QEIIYGQRHHQKRYWLLTTPQTLPENSTS-----YVMAA  
 APE----IKLDEIGDCYGFRTWIEYGLKQSKD-TLGWADFRMTHYEQIEKWWEIVMSA  
 FLMVSLFADVFNDS-----CPVAHQHFAQHPwWDNONG  
 WKNLLNNVR--LIIQPLIS----WNLKRWLEVFPSRALKKGf"  
 /note="IS4 e-value= 9.9e-07 complete sequence hit  
 coverage= 100%, between model( 486 aa) positions 1; 486  
 length is 376aa with 117 gaps, 0 stops, absolute frame=  
 Plus3"  
 CDS 5358090..5358287  
 /colour="255 0 0"  
 /evidence=predicted  
 /translation="ASPIELSQQQHHCLTQIVRQTTNPYRLVRRASIILSAASGESNT  
 QISRQWQLDRNQVRYWRQRWLD"  
 /note="IS630 e-value= 4e-07 fragment hit coverage=  
 17.55%, between model( 376 aa) positions 1; 66 length is  
 66aa with 0 gaps, 0 stops, absolute frame= Plus3"  
 CDS 5653053..5653250  
 /colour="255 0 0"  
 /evidence=predicted  
 /translation="GKHKQILLVLDGAGWHTC---KNRVVPPG--IHLKILPPYSPEL

QPAERLWRLADEPLAN-QCFETLDDLED"  
 /note="IS630 e-value= 1.4e-09 fragment hit coverage=  
 19.15%, between model( 376 aa) positions 275; 346 length  
 is 66aa with 6 gaps, 0 stops, absolute frame= Plus3"  
 CDS 5666475..5666576  
 /colour="255 0 0"  
 /evidence=predicted  
 /translation="MTYRKLSHSVWECKYHVVFPKHKRGRIYGRIRR"  
 /note="IS200 e-value= 1.1e-12 fragment hit coverage=  
 22.08%, between model( 154 aa) positions 1; 34 length is  
 34aa with 0 gaps, 0 stops, absolute frame= Plus3"  
 CDS 5666475..5666933  
 /colour="255 0 0"  
 /evidence=predicted  
 /translation="MTYRKLSHSVWECKYHVVFPKHKRGRIYGRIRRIXAIFLXAGT  
 SXRECHRrrsFNARSCSX-----VVEYSAEILRVQCGLRKRKSAIYIARELGNSRNA  
 -TGHKFWSRGYFVSTVG-KDEEMICXYIRpgiRSKKSXSXSNXTCFGRSPSPLXGVPI  
 "  
 /note="IS200 e-value= 3.1e-10 complete sequence hit  
 coverage= 100%, between model( 154 aa) positions 1; 154  
 length is 153aa with 7 gaps, 8 stops, absolute frame=  
 Plus3"  
 CDS 5666475..5666576  
 /colour="255 0 0"  
 /evidence=predicted  
 /translation="MTYRKLSHSVWECKYHVVFPKHKRGRIYGR-IRR"  
 /note="IS200\_IS605 e-value= 1.5e-13 fragment hit  
 coverage= 22.88%, between model( 153 aa) positions 1; 35  
 length is 34aa with 1 gaps, 0 stops, absolute frame=  
 Plus3"  
 CDS 5666475..5666906  
 /colour="255 0 0"  
 /evidence=predicted  
 /translation="MTYRKLSHSVWECKYHVVFPKHKRGRIYGR--IRRIXAIFLXA  
 GTsxRECHRrrsFNARSCSX-----VVEYSAEILRVQCGLRKRKSAIYIARELGNSR  
 NA-TGHKFWSRGYFVSTVG-KDEEMICXYIR-----PGIRSKKSXSXSNXTCFGRS"  
 /note="IS200\_IS605 e-value= 5.4e-10 complete sequence hit  
 coverage= 100%, between model( 153 aa) positions 1; 153  
 length is 144aa with 14 gaps, 6 stops, absolute frame=  
 Plus3"  
 CDS 5666475..5666576  
 /colour="255 0 0"  
 /evidence=predicted  
 /translation="-MTYRKLSHSVWECKYHVVFPKHKRGRIYGRIRR"  
 /note="IS605 e-value= 1.1e-11 fragment hit coverage=  
 23.03%, between model( 152 aa) positions 1; 35 length is  
 34aa with 1 gaps, 0 stops, absolute frame= Plus3"  
 CDS 5666475..5666906  
 /colour="255 0 0"  
 /evidence=predicted  
 /translation="-MTYRKLSHSVWECKYHVVFPKHKRGRIYGRIRRIXAIFLXAG  
 TSXREChrrRSFNARSCSXVVEYSAEI---LRVQC-GGLRKRKSAIYIARELGNSRN-  
 ATGHKFWSRGYFVSTVGKDEEMICXYIRPGIRSKK-----SKXSXSNXTCFGRS"  
 /note="IS605 e-value= 1.7e-10 complete sequence hit  
 coverage= 100%, between model( 152 aa) positions 1; 152  
 length is 144aa with 11 gaps, 7 stops, absolute frame=  
 Plus3"  
 CDS 5666769..5666846  
 /colour="255 0 0"  
 /evidence=predicted

```

/translation="GHKFWSRGYFVSTVG-KDEEMICXYIR"
/note="IS200 e-value= 3.8e-10 fragment hit coverage=
17.53%, between model( 154 aa) positions 102; 128 length
is 26aa with 1 gaps, 1 stops, absolute frame= Plus3"
CDS 5666769..5666846
/colour="255 0 0"
/evidence=predicted
/translation="GHKFWSRGYFVSTVG-KDEEMICXYIR"
/note="IS200_IS605 e-value= 1.3e-09 fragment hit
coverage= 17.65%, between model( 153 aa) positions 102;
128 length is 26aa with 1 gaps, 1 stops, absolute frame=
Plus3"
CDS 5666769..5666846
/colour="255 0 0"
/evidence=predicted
/translation="GHKFWSRGYFVSTVGKDEEMICXYIR"
/note="IS605 e-value= 5.7e-09 fragment hit coverage=
17.11%, between model( 152 aa) positions 102; 127 length
is 26aa with 0 gaps, 1 stops, absolute frame= Plus3"
CDS 5908257..5908664
/colour="255 0 0"
/evidence=predicted
/translation="MLLVRPISTESLRLHRIYHSSRHHQVRQRAHCLILFAQGWPYY
TLASLFSVSPKTVYNWLKAWNNRG---FAGLYNHPPGRGRKPMFNPDQQQQIYEW-TQA
SPIQ-----LNQVLAQIEQQWSVRVSKATVKRVLKQMDMSWHR"
/note="IS630 e-value= 8.7e-15 fragment hit coverage=
39.63%, between model( 376 aa) positions 1; 149 length is
136aa with 13 gaps, 0 stops, absolute frame= Plus3"
CDS 5908317..5908655
/colour="255 0 0"
/evidence=predicted
/translation="SSRHHQVRQRAHCLILFAQGWPYYTLASLFSVSPKTVYNWLKAW
NNRGFAGLYNH---PGRGRKPMFNPDQQQQIYEW-TQASPIQLNQVLAQIEQQWSVR--
-VSKATVKRVLKQMDMS"
/note="IS481 e-value= 3.5e-09 fragment hit coverage=
33.62%, between model( 351 aa) positions 1; 118 length is
113aa with 6 gaps, 0 stops, absolute frame= Plus3"
CDS 5916063..5917301
/colour="255 0 0"
/evidence=predicted
/translation="IRIPLNLPDI--RVLELSKTERGDWL-----IKIESTLQGTTC
HQC GREITDL-HCHDQ-PFRIRHLPLFEVPVYLEIRPKRYRCKYCDDhpTTTQHLEWH
EPRSPNTKAYERWLLRILIN-STVSDVARKLGVSEDIVSGIIDRWIAAQVDWSEYADL
KVMGMDEISLKR--HR---DFVVLITIP-TTdgVDILAVLADRKQQTVANFLQSIP-I
DLRQTIERVCTDMYQGFVSAVREQLPQAKIVIDRFHVTKAYRNCADTVRKREVKRLRR
ELS-----KQEYD-----SIKGAMWPFKRKPENLKES-EQOLLER
LFA--YSPQLKQAYNLREKLTQIFEGRYTKHGAKcAIRAWCKQVLKSDiKEFDCFLTT
INNWMDEMTNYFLEG-WTSGFVEGFNNRVKVLKRRCYGIFDIERLQFQRIISLDLNGYQT
FAVTXTL"
/note="ISL3 e-value= 1.8e-43 complete sequence hit
coverage= 100%, between model( 451 aa) positions 1; 451
length is 413aa with 44 gaps, 1 stops, absolute frame=
Plus3"
CDS 5916222..5917301
/colour="255 0 0"
/evidence=predicted
/translation="RIRHLPLFEVPVYLEIRPKRYRCKYCDDhpTTTQHLEWHEPRSP
NTKAYERWLLRILIN-STVSDVARKLGVSEDIVSGIIDRWIAAQVDWSEYADLKVMGM
DEISLKR--HR---DFVVLITIP-TTdgVDILAVLADRKQQTVANFLQSIP-IDLRQTI
ERVCTDMYQGFVSAVREQLPQAKIVIDRFHVTKAYRNCADTVRKREVKRLRRELS--

```

```

-----KQEYD-----SIKGAMWPFRRKRPENLKES-EQOLLERLFA--
YSPQLKQAYNLREKLTQIFEGRYTKHGAKcAIRAWCKQVLKSDiKEFDCFLTINNM
DEMTNYFLEG-WTSGFVEGFNNRVKVLKRRCYGIFDIERLFQRIISLDLNGYQTFVAVTX
TL"
/note="ISL3 e-value= 1e-49 fragment hit coverage= 86.03%,
between model( 451 aa) positions 64; 451 length is 360aa
with 34 gaps, 1 stops, absolute frame= Plus3"
CDS 5942076..5942741
/colour="255 0 0"
/evidence=predicted
/translation="-----TGVYKQTF-KRMLHAWHTYHLSHSNAGRPPKLCRPDQLL
VALQYWREYRTYFHIAGDWEVSESTVCRIVHQVETALMNSGLFRLPGKKHLIQGFERPDVVMDVTETPIERPQKQKAYYSGKKRDIPSARLLLTAT--LXRLSV-----X
ALAQAQVGMIFR-----YSRVQVSIS--IQIPRVCKIADIKGLQPTTPTAM
FLS-----RSHNMVNXLPCSESITVHXVRNEWALNTLIAA"
/note="IS5_ISL2 e-value= 1.8e-23 complete sequence hit
coverage= 100%, between model( 260 aa) positions 1; 260
length is 222aa with 39 gaps, 4 stops, absolute frame=
Plus3"
CDS 5942136..5942447
/colour="255 0 0"
/evidence=predicted
/translation="SHSNAGRPPKLCRPDQLLVALQYWREYRTYFHIAGDWEVSESTV
CRIVHQVETALMNSGLFRLPGKKHLIQGFERPDVVMDVTETPIERPQKQKAYYSGK
KR"
/note="IS5_ISL2 e-value= 5e-44 fragment hit coverage=
40%, between model( 260 aa) positions 26; 129 length is
104aa with 0 gaps, 0 stops, absolute frame= Plus3"
CDS 5992275..5993312
/colour="255 0 0"
/evidence=predicted
/translation="PMIKIDFTAEEIQQLNYERYHHPHPRVQRRMEVLYLKSQGLSHT
QICQLCQISRPTLAKTLRQYQGG---IEGLKTLEYKQGPSLLNAHS-DSVRAYFEQH
PP-----RTSAEAQAVIEQLTGIKRSPTQIKAFKLRIGCRYRKGVYVPGKSSLP
-EKIEEQEQFRHTRLEPLleeAQRQERLVFFVDAAHFVHRAYLGF-VWCITRI-----
-----FIPSPS-GRQRFNVLGALDAITKDLVSVTNHTYINSHSMCLLLAKLALL
DPV-IPISVILDNARYQKCQLVTDFAEIVD--IELVYLPSYSPHLNLIERLWRFVVRKE
CLYSKYADFPFAFKGAIQQCIDQCNGEHKAKLTLLSLKFQSFKK"
/note="IS630 e-value= 6.7e-25 complete sequence hit
coverage= 100%, between model( 376 aa) positions 1; 376
length is 346aa with 33 gaps, 0 stops, absolute frame=
Plus3"
CDS 5992275..5993312
/colour="255 0 0"
/evidence=predicted
/translation="PMIKIDFTAEEIQQLNYERYHHPHPRVQRRMEVLYLKSQGLSHT
QICQLCQISRPTLAKTLRQYQGG---IEGLKTLEYKQGPSLLNAHS-DSVRAYFEQH
PP-----RTSAEAQAVIEQLTGIKRSPTQIKAFKLRIGCRYRKGVYVPGKSSLP
-EKIEEQEQFRHTRLEPLleeAQRQERLVFFVDAAHFVHRAYLGF-VWCITRI-----
-----FIPSPS-GRQRFNVLGALDAITKDLVSVTNHTYINSHSMCLLLAKLALL
DPV-IPISVILDNARYQKCQLVTDFAEIVD--IELVYLPSYSPHLNLIERLWRFVVRKE
CLYSKYADFPFAFKGAIQQCIDQCNGEHKAKLTLLSLKFQSFKK"
/note="IS630 e-value= 4.9e-24 complete sequence hit
coverage= 100%, between model( 376 aa) positions 1; 376
length is 346aa with 33 gaps, 0 stops, absolute frame=
Plus3"
CDS 5992335..5992493
/colour="255 0 0"
/evidence=predicted
/translation="HHPHPRVQRRMEVLYLKSQGLSHTQICQLCQISRPTLAKTLRQY

```

QGGIEGLK"  
 /note="IS481 e-value= 3.7e-09 fragment hit coverage= 15.10%, between model( 351 aa) positions 1; 53 length is 53aa with 0 gaps, 0 stops, absolute frame= Plus3"  
 CDS 6109407..6109544  
 /colour="255 0 0"  
 /evidence=predicted  
 /translation="WQTDGWEGYARQLPDE---VVHEVSKALTQRLERTNGIVRQQTGRWHRR"

/note="IS1\_ORF2 e-value= 1.8e-11 fragment hit coverage= 20.68%, between model( 237 aa) positions 164; 212 length is 46aa with 3 gaps, 0 stops, absolute frame= Plus3"  
 CDS 6263616..6264854  
 /colour="255 0 0"  
 /evidence=predicted  
 /translation="IRIPLNLPDI--RVLELSKTERGDWL-----IKIESTLQGTTC HQCGREITDL-HCHDQ-PFRIRHLPLFEVPVYLEIRPKRYRCKYCDDhpTTTQHLEWH EPRSPNTKAYERWLLRILIN-STVSDVARKLGVSEDIVSGIIDRWIAAQVDWSEYADL KVMGMDEISLKRK--HR---DFVVLITIPtTdgVDILAVLADRKQQTVANFLQSIP-IDLRQTIERVCTDMYQGFVSAVREQLPQAKIVIDRFHVTKAYRNCADTVRKREVKRLRR ELS-----KQEYD-----SIKGAMWPFKRKPENLKES-EQQLLER LFA--YSPQLKQAYNLREKLTQIFEGRYTKHGAKcAIRAWCKQVLKSDiKEFDCFLTT INNWMDEMTNYFLEG-WTSGFVEGFNNRVKVLKRRRCYGIFDIERLRFQORISLDLNGYQT FAVTXML"

/note="ISL3 e-value= 1.8e-43 complete sequence hit coverage= 100%, between model( 451 aa) positions 1; 451 length is 413aa with 44 gaps, 1 stops, absolute frame= Plus3"  
 CDS 6263775..6264854  
 /colour="255 0 0"  
 /evidence=predicted  
 /translation="RIRHLPLFEVPVYLEIRPKRYRCKYCDDhpTTTQHLEWHEPRSP NTKAYERWLLRILIN-STVSDVARKLGVSEDIVSGIIDRWIAAQVDWSEYADLKVMGM DEISLKRK--HR---DFVVLITIPtTdgVDILAVLADRKQQTVANFLQSIP-IDLRQTI ERVCTDMYQGFVSAVREQLPQAKIVIDRFHVTKAYRNCADTVRKREVKRLRRELS-- -----KQEYD-----SIKGAMWPFKRKPENLKES-EQQLLERLFA-- YSPQLKQAYNLREKLTQIFEGRYTKHGAKcAIRAWCKQVLKSDiKEFDCFLTTINNWM DEMTNYFLEG-WTSGFVEGFNNRVKVLKRRRCYGIFDIERLRFQORISLDLNGYQTFAVXT L"

/note="ISL3 e-value= 1e-49 fragment hit coverage= 86.03%, between model( 451 aa) positions 64; 451 length is 360aa with 34 gaps, 1 stops, absolute frame= Plus3"  
 CDS 6300402..6300794  
 /colour="255 0 0"  
 /evidence=predicted  
 /translation="VDTHGQSEVGFACFYLLNFQLMPRFKGINQKLYLPMsGQKKKY VYLKAIKRPMPRWDLVREQYEPMIQFTTAMKQGTAEPEAILS RFRNNIKHPTYLALA ELGRAIKTIFLCQYLHDEALRQEINEGLN"

/note="Tn3 e-value= 7.4e-17 fragment hit coverage= 12.95%, between model( 1004 aa) positions 764; 893 length is 131aa with 0 gaps, 0 stops, absolute frame= Plus3"  
 CDS 6306396..6307874  
 /colour="255 0 0"  
 /evidence=predicted  
 /translation="DSYHTRVYMNGRDLGLKQAEAAAYIAEISTRGQRIEAGTHQPNR -GRLQD-----QRTVPDPLADVWE---DELEPMLRRDPRLKPMTLYEYLQD-KYPG QYPQVlrtlQRRVRTWKALHGPS-----PEVMFELRHEPGVQGFSDFTLKGITITIA GQPFEHLIYHYRLGYSGWRYAQIIQgESFVALSEGLQNAFAACGGVPQOHRDLSLA AYRNMGGRRS-KNLTRLYDELCDHYRLEPTRNNKG--IAHENGSIESPHGHLKNRIKQ AIYLRSAD-----FTSVAEYQALIDAQVAKLNQOCQTK-----YEQEKDHLQPLPK

YRTPDYEVLTAAAAKVSKRSTIDVRCILYTVPSRLIGRQLELHLYHDRVGYLERHP  
VVELPRKRVSGKGRDRRCINRHRVIGSMRLKPRAFIYCTWQSDLLPNPEYRQIWEQL  
KAQFDLEQAAKIIVEALYIAAVQDKEQAVAVYLOOQLOASSLTLNRLKKQFEPQMKO  
VPDLSIeQHS----LELYDKLLPS"  
/note="IS21\_ORF1 e-value= 1.3e-21 complete sequence hit  
coverage= 100%, between model( 525 aa) positions 1; 525  
length is 493aa with 39 gaps, 0 stops, absolute frame=  
Plus3"

CDS 6306666..6307496  
/colour="255 0 0"  
/evidence=predicted  
/translation="QYPQVLRRTLQRRVRTWKALHGPS-----PEVMFELRHEPGVQGF  
SDFTELKGITITTIAGQPFHELIYHYRLGYSGWRYAQIIQGGESFVALSEGLQNAFAAC  
GGVPOQHRTDSLAAAYRNMGGRRS-KNLTRLYDELCDHYRLEPTRNNKG--IAHENG  
IESPHGHLKNRIKQAIYLRGSAD-----FTSVAEYQALIDAQVAKLNQOCQTK-----  
-YEQEKDHLQPLPKYRTPDYEVLTAAAAKVSKRSTIDVRCILYTVPSRLIGRQLELH  
LYHDRVGY-----LERHPVVELPRKRV"

/note="IS21\_ORF1 e-value= 1e-29 fragment hit coverage=  
57.90%, between model( 525 aa) positions 99; 402 length  
is 277aa with 28 gaps, 0 stops, absolute frame= Plus3"  
complement(6395489..6394549)  
/colour="255 0 0"  
/evidence=predicted  
/translation="TKNRXPMSYQIRNWSEYNAGLKQRGSVTFWLEQS--AIVHWLET  
TPRQKRGASLTYSDTAISTFETVKCIYGLAGRQTEGFLNSLFELMGIELPVC DHSTVS  
RRKGQLSISLPVIPKQGAIHVVIDSTGVKVG-----EGEWKTRQHGVS-K  
RRTWRKLHLSVDESTGEILTGVVTTNDVQDGEVFEDLLEGIDD-----EIEQVSAD-G  
AYDQSHCYDALMERNATAAIPPRKNA-----KIWQHGN--NApphpRDQ  
NLRAIRKQGRKRWKKQAHYHRRSLAETTMFRFKTIFGGQVRSRNFNDQATELLLOCA  
LN-RMIQIAKPETVWVE"

CDS complement(6395489..6394549)  
/colour="255 0 0"  
/evidence=predicted  
/translation="TKNRXPMSYQIRNWSEYNAGLKQRGSVTFWLEQS--AIVHWLET  
TPRQKRGASLTYSDTAISTFETVKCIYGLAGRQTEGFLNSLFELMGIELPVC DHSTVS  
RRKGQLSISLPVIPKQGAIHVVIDSTGVKVG-----EGEWKTRQHGVS-K  
RRTWRKLHLSVDESTGEILTGVVTTNDVQDGEVFEDLLEGIDD-----EIEQVSAD-G  
AYDQSHCYDALMERNATAAIPPRKNA-----KIWQHGN--NApphpRDQ  
NLRAIRKQGRKRWKKQAHYHRRSLAETTMFRFKTIFGGQVRSRNFNDQATELLLOCA  
LN-RMIQIAKPETVWVE"

/note="IS5\_IS903 e-value= 1.1e-96 complete sequence hit  
coverage= 100%, between model( 347 aa) positions 1; 347  
length is 314aa with 37 gaps, 1 stops, absolute frame=  
Minus1"  
complement(6395489..6394549)  
/colour="255 0 0"  
/evidence=predicted  
/translation="TKNRXPMSYQIRNWSEYNAGLKQRGSVTFWLEQS--AIVHWLET  
TPRQKRGASLTYSDTAISTFETVKCIYGLAGRQTEGFLNSLFELMGIELPVC DHSTVS  
RRKGQLSISLPVIPKQGAIHVVIDSTGVKVG-----EGEWKTRQHGVS-K  
RRTWRKLHLSVDESTGEILTGVVTTNDVQDGEVFEDLLEGIDD-----EIEQVSAD-G  
AYDQSHCYDALMERNATAAIPPRKNA-----KIWQHGN--NApphpRDQ  
NLRAIRKQGRKRWKKQAHYHRRSLAETTMFRFKTIFGGQVRSRNFNDQATELLLOCA  
LN-RMIQIAKPETVWVE"

CDS complement(6348974..6348694)  
/colour="255 0 0"  
/evidence=predicted  
/translation="SISFRaMQCIHCQSEN-VVKNGTKT-LKtaqvYFLCKDCGRR  
FN-ERSGTPMARLrtpvETISMARNARTEGLGIRAAGRVLGKSPSILLWEKR"

/note="IS1\_ORF1 e-value= 9.8e-10 fragment hit coverage=  
36.82%, between model( 239 aa) positions 1; 88 length is  
94aa with 3 gaps, 0 stops, absolute frame= Minus1"  
complement(6343880..6343381)  
/colour="255 0 0"  
/evidence=predicted  
/translation="QVTLIEAAVETQQRFGWRVYVTNAPLEELSFEEAVLTVRDAWI



QESGFSRLKGNPLGASPLFVQRDDHAKGLMHLLSLGLRILTLIEFVVQRRLKQ-----  
-----HKEkLFGLFPGNPKRATTRPTTERILRAFKDISLTILGVKDeey  
ghVSPLTSLQQRILELLGLAPDIYSS"  
/note="IS4 e-value= 3e-08 fragment hit coverage= 37.04%,  
between model( 486 aa) positions 307; 486 length is 167aa  
with 19 gaps, 0 stops, absolute frame= Minus1"  
CDS complement(6314132..6313894)  
/colour="255 0 0"  
/evidence=predicted  
/translation="TLAKLDHFELFILDEIGYDIKTDETSIQSELIVHRYERRSFKI  
TANHPFSTRXCIFC-DSSMTVAAIDRFVYHAFIIEIK"  
/note="IS21\_ORF2 e-value= 1.3e-09 fragment hit coverage=  
31.40%, between model( 258 aa) positions 157; 237 length  
is 80aa with 1 gaps, 1 stops, absolute frame= Minus1"  
CDS complement(6234089..6232612)  
/colour="255 0 0"  
/evidence=predicted  
/translation="DSYHTRVYMNGRDLGLKQAEAAAYIAEISTRGQRIEAGTHQPNR  
-GRLQD-----QRTVPDPLADVWE---DELEPMLRRDPRLKPMPLYEYLQD-KYPG  
QYPQVlrtlQRRVRTWKALHGPS-----PEVMFELRHEPGVQGFSDFTTELKGITITIA  
GKPFELIYHYRLGYSGWRYAQIIQGgESFVALSEGLQNAFAACGGVPTQHRDLSA  
AYRNMGGRRS-KNLTRLYDELCDHYRLEPTRNNKG--VAHENGSIESP HGHLKNRIKQ  
AIYLRGSAD-----FTSVGEYQALIDAQVA---KLNQOC---QAKYEQEKELQPLPK  
YRTPDYEVLTATA----KVKRSTIDVRCILYTVPSRLIGRQLELHLYHDRVIGYLERHP  
VVELPRKRVSGkGKRRDRRCINRHHVIGSMRLKPRAFIYCTWQSDLLPNPEYRQIWEQL  
KAQFDLEQA AKIIVEALYIAAVQDKEQAVAVYLOQQLRSSLTLNRLKKQFEPQMKQ  
VPDLSIeQHS----LELYDKLLPS"  
/note="IS21\_ORF1 e-value= 3.3e-24 complete sequence hit  
coverage= 100%, between model( 525 aa) positions 1; 525  
length is 493aa with 39 gaps, 0 stops, absolute frame=  
Minus1"  
CDS complement(6233819..6232990)  
/colour="255 0 0"  
/evidence=predicted  
/translation="QYPQVLR TLQRRVRTWKALHGPS-----PEVMFELRHEPGVQGF  
SDFTTELKGITITIA GKPFEHLIYHYRLGYSGWRYAQIIQGgESFVALSEGLQNAFAAC  
GGVPTQHRDLSAAYRNMGGRRS-KNLTRLYDELCDHYRLEPTRNNKG--VAHENG  
SIESP HGHLKNRIKQAIYLRGSAD-----FTSVGEYQALIDAQVA---KLNQOC---QA  
KYEQEKELQPLPKYRTPDYEVLTATA----KVKRSTIDVRCILYTVPSRLIGRQLELH  
LYHDRVIGY-----LERHPVVELPRKRVS"  
/note="IS21\_ORF1 e-value= 4.2e-32 fragment hit coverage=  
57.90%, between model( 525 aa) positions 99; 402 length  
is 277aa with 28 gaps, 0 stops, absolute frame= Minus1"  
CDS complement(6059630..6059137)  
/colour="255 0 0"  
/evidence=predicted  
/translation="LEKTGIESKKKTYGYR--ERD--ETQR---QAFIERLQTKHP--  
HQIVYVDEAGIDNRADYPY-GYCPVG-----QRFYD-LKSG-KRTERVSFIA  
ALKEGQL--FSPMTFEGSCNRLLEFAWLQOSLI-SQLQLgdVIVIDNASFHHGQRIEE  
IVAEAG--CEIWYLPSPDLNKIERWWFVLKN"  
/note="IS630 e-value= 3e-16 fragment hit coverage=  
50.80%, between model( 376 aa) positions 140; 330 length  
is 165aa with 28 gaps, 0 stops, absolute frame= Minus1"  
CDS complement(6014810..6014614)  
/colour="255 0 0"  
/evidence=predicted  
/translation="ASPIELSQQQHHCLTQIVRQTTPYRLVRRASIILSAASGESNT  
QISRQWQLDRNQVRYWRQRWLD"  
/note="IS630 e-value= 4e-07 fragment hit coverage=  
17.55%, between model( 376 aa) positions 1; 66 length is

66aa with 0 gaps, 0 stops, absolute frame= Minus1"

CDS complement(5728283..5728174)  
/colour="255 0 0"  
/evidence=predicted  
/translation="VMKVM I-CPHCQSDR-LSKNGKRR-NQQCYVCKDCRKQFV"  
/note="IS1\_ORF1 e-value= 4.1e-06 fragment hit coverage= 16.74%, between model( 239 aa) positions 1; 40 length is 37aa with 3 gaps, 0 stops, absolute frame= Minus1"

CDS complement(5719823..5719186)  
/colour="255 0 0"  
/evidence=predicted  
/translation="MASKTTNVkPVVVS LWKLLSKSELIHPLKAXSISYCLKRYLWQV L-----PGS-----VMFLKAGYKSTXTVsMKQCLVLXTYHQKKGR-----  
---LTLQCDEMWSFVNDKSNKQWIWLALDVITREIVGVYVGARSKQGARQLWNSLPGI YRQCAVaYTDfWDAYGCVFPKQ-RHQAVGKETGQTCYIERFNCTMRQRVSR LVRKTL SFSKKLENHIGAIWMFVHHYNAS"  
/note="IS1\_ORF2 e-value= 4.6e-13 complete sequence hit coverage= 100%, between model( 237 aa) positions 1; 237 length is 213aa with 27 gaps, 3 stops, absolute frame= Minus1"

CDS complement(5719571..5719195)  
/colour="255 0 0"  
/evidence=predicted  
/translation="DEMWSFVNDKSNKQWIWLALDVITREIVGVYVGA----RSKQGA RQLwNSLPGIYRQCAVaYTDfWDAYgCVFPKQRHQAVGKETgQTCYIERFNCTMRQRV SR LVRKTL SFSKKLENHIGAIWMF---VHHY"  
/note="IS1\_ORF1 e-value= 4.6e-14 fragment hit coverage= 53.97%, between model( 239 aa) positions 111; 239 length is 126aa with 7 gaps, 0 stops, absolute frame= Minus1"

CDS complement(5719571..5719186)  
/colour="255 0 0"  
/evidence=predicted  
/translation="DEMWSFVNDKSNKQWIWLALDVITREIVGVYVGARSKQGARQLW NSLPGIYRQCAVaYTDfWDAYGCVFPKQ-RHQAVGKETGQTCYIERFNCTMRQRVSR LVRKTL SFSKKLENHIGAIWMFVHHYNAS"  
/note="IS1\_ORF2 e-value= 6.2e-32 fragment hit coverage= 54.43%, between model( 237 aa) positions 109; 237 length is 129aa with 1 gaps, 0 stops, absolute frame= Minus1"

CDS complement(5718014..5717818)  
/colour="255 0 0"  
/evidence=predicted  
/translation="ASPIELSOQQHHCLTQIVRQTTPYRLVRRASIILSAAGESNT QISRQWQLDRNQVRYWRQRWLD"  
/note="IS630 e-value= 4e-07 fragment hit coverage= 17.55%, between model( 376 aa) positions 1; 66 length is 66aa with 0 gaps, 0 stops, absolute frame= Minus1"

CDS complement(5509199..5509063)  
/colour="255 0 0"  
/evidence=predicted  
/translation="WQTDGWEGYARQLPDE---VVHEVSKALTQRLERTNGIVRQQTG RWHRR"  
/note="IS1\_ORF2 e-value= 1.8e-11 fragment hit coverage= 20.68%, between model( 237 aa) positions 164; 212 length is 46aa with 3 gaps, 0 stops, absolute frame= Minus1"

CDS complement(5354885..5354170)  
/colour="255 0 0"  
/evidence=predicted  
/translation="YLSPE S-LXCRASSKVSMXSTVGS P S-----ILARISDL FPHCWRLGSLXINCLPYCpGRDRSDELRTLSLTRSEISATR-----VRATGCR CDGCDXNAHXTSPDKTKSVLF----RKKKRHTFKCQIIANRNTLEIICLNVGPGRRHD

FQISKVSGIHIHPDTESLQDSGYQGIAAYHANSYVPLKKPOHGELTSLOREYNRALSQ  
 ERMGIEHINRSLKIFRILSERYRNRRRRYALRCNLIAAIYNYEL"  
 /note="IS5\_ISL2 e-value= 8.9e-38 complete sequence hit  
 coverage= 100%, between model( 260 aa) positions 1; 260  
 length is 239aa with 23 gaps, 5 stops, absolute frame=  
 Minus1"  
 CDS complement(5354570..5354170)  
 /colour="255 0 0"  
 /evidence=predicted  
 /translation="KKKRHTFKCQIIANRNTLEIICLNVGPGRRRHDFQISKVSGIHIH  
 PDTESLQDSGYQGIAAYHANSYVPLKKPOHGELTSLOREYNRALSQERMGIEHINRSL  
 KIFRILSERYRNRRRRYALRCNLIAAIYNYEL"  
 /note="IS5\_ISL2 e-value= 4.7e-61 fragment hit coverage=  
 51.54%, between model( 260 aa) positions 127; 260 length  
 is 134aa with 0 gaps, 0 stops, absolute frame= Minus1"  
 CDS complement(5242232..5241538)  
 /colour="255 0 0"  
 /evidence=predicted  
 /translation="FKHLHLGMI sDIKRKSLPAIARAVGLENHQSLHHLFSESPPWVAS  
 hLSDkRLDIILKILDGRRLILLID-----ETGDCKKGKSTDYVVKR  
 QYIGNVGKKENGIvAVTAYGLFQGMILPLSFEVYKPR-----ErLKEEDEYLSK  
 PQIAAGMIRQLQGMGFCFELVLADSLYGEAQTNFVNVLEELKLPYILAIRSNHAVWLP  
 AEQAVFAEPWQSFERTFSNGTTETRYrQEIIYGqrhhQKRY"  
 /note="IS4 e-value= 4.7e-14 fragment hit coverage=  
 51.23%, between model( 486 aa) positions 1; 249 length is  
 232aa with 27 gaps, 0 stops, absolute frame= Minus1"  
 CDS complement(5242232..5241106)  
 /colour="255 0 0"  
 /evidence=predicted  
 /translation="FKHLHLGMI sDIKRKSLPAIARAVGLENHQSLHHLFSESPPWVAS  
 hLSDkRLDIILKILDGRRLILLID-----ETGDCKKGKSTDYVVKR  
 QYIGNVGKKENGIvAVTAYGLFQGMILPLSFEVYKPR-----ErLKEEDEYLSK  
 PQIAAGMIRQLQGMGFCFELVLADSLYGEAQTNFVNVLEELKLPYILAIRSNHAVWLP  
 AEQAVFAEPWQSFERTFSNGT-----TETRYR  
 QEIIYGQRHHQKRYWLLTTDPQTLPENSTS-----YVMAA  
 APE----IKLDEIGDCYGFRTWIEYGLKQSKD-TLGWADFRMTHYEQIEKWWEIVMSA  
 FLMVSLFADVFNDS-----CPVAHQHFAQHPWWDNONG  
 WKNLLNNVR--LIIQPLIS----WNLLKRWLEVFPSRALKKGF"  
 /note="IS4 e-value= 9.9e-07 complete sequence hit  
 coverage= 100%, between model( 486 aa) positions 1; 486  
 length is 376aa with 117 gaps, 0 stops, absolute frame=  
 Minus1"  
 CDS complement(5175581..5174845)  
 /colour="255 0 0"  
 /evidence=predicted  
 /translation="-----TGVYKRTFkrMLHAWHTYHLRSRN--AGRPPKLCQCDQL  
 LVTLOYWREYR TYFHIAGDWEVSESTVCRIVHQVETALMNSGLFRLPGQKSLLOQFER  
 PDVVVMDVTETPIERPQTRQKAYYSGKKRDIPSNARLSLTATLXr lsaltLVQVVG--  
 -----MIFRSSRVQVSISIQIPRVCKIADIKGLQ-----PIMP-TAMFLSRSHNTV  
 NXLPCESESITVLXVRNEWALNTLIAAXRFSEFCRSAIAIVVVATRCGVTX"  
 /note="IS5\_ISL2 e-value= 3.2e-21 complete sequence hit  
 coverage= 100%, between model( 260 aa) positions 1; 260  
 length is 246aa with 22 gaps, 5 stops, absolute frame=  
 Minus1"  
 CDS complement(5175521..5175211)  
 /colour="255 0 0"  
 /evidence=predicted  
 /translation="SRSNAGRPPKLCQCDQLLVTLOYWREYR TYFHIAGDWEVSESTV  
 CRIVHQVETALMNSGLFRLPGQKSLLOQFERPDVVVMDVTETPIERPQTRQKAYYSGK  
 KR"

```

/note="IS5_ISL2 e-value= 7.6e-44 fragment hit coverage=
40%, between model( 260 aa) positions 26; 129 length is
104aa with 0 gaps, 0 stops, absolute frame= Minus1"
CDS complement(5069105..5069026)
/colour="255 0 0"
/evidence=predicted
/translation="TFSCLNRYRRLGKDYELYPETSEAMIY"
/note="IS5_IS1031 e-value= 5.8e-07 fragment hit coverage=
9.15%, between model( 295 aa) positions 246; 272 length
is 27aa with 0 gaps, 0 stops, absolute frame= Minus1"
CDS complement(4933280..4932616)
/colour="255 0 0"
/evidence=predicted
/translation="FKYLHLGMMsDIKHKSLPAIARICGLANEQGLLHFLTESPWRPS
aLEQaRLNLILQVLSGRPLTLIID-----ETEDRKKGKQTDYVQR
QYLGNLGKVDNGIvAVTAYGVVEHMTLPLMFRVYKPKsRLQSGD-----VYHSK
PEIAVSMIDELLAHGCFDLVLDADSLYGESGSTFVSHLQALQLPYVVAIRSNHGLWLP
KEQVRVRCNRWRAFEHVFSFGS-----CETRYIREVI"
/note="IS4 e-value= 4.5e-12 fragment hit coverage=
53.29%, between model( 486 aa) positions 1; 259 length is
222aa with 42 gaps, 0 stops, absolute frame= Minus1"
CDS complement(4933280..4932184)
/colour="255 0 0"
/evidence=predicted
/translation="FKYLHLGMMsDIKHKSLPAIARICGLANEQGLLHFLTESPWRPS
aLEQaRLNLILQVLSGRPLTLIID-----ETEDRKKGKQTDYVQR
QYLGNLGKVDNGIvAVTAYGVVEHMTLPLMFRVYKPKsRLQSGD-----VYHSK
PEIAVSMIDELLAHGCFDLVLDADSLYGESGSTFVSHLQALQLPYVVAIRSNHGLWLP
KEQVRVRCNRWRAFEHVFSFGS-----CETRYIREV
IYQQR---LAQQFWDITTDQPONLPKASTW-----YVMS
EIE---GVKYHQIGNFYGLRNWVEYGLKQSKN-ELGWADFRVTDYDQIERWWQVVMAS
YLMVSLHSDRFEL-----PTGLSMKQQVP
PVIETFQ---HRYWQTGKGWKHLLNLRVLIQSLILFD"
/note="IS4 e-value= 1.2e-06 complete sequence hit
coverage= 100%, between model( 486 aa) positions 1; 486
length is 366aa with 126 gaps, 0 stops, absolute frame=
Minus1"
CDS complement(4908698..4908313)
/colour="255 0 0"
/evidence=predicted
/translation="YADESGMDHRDEYDY-AYGPKGE-----RVYA-LKTG-
RRSGRVNMIAALRAKQL--MAPFTIEGACNRTVFELwLERCLIPvlKPGQKLVl--DN
ATFHKGQIQELVEKAG--CEVWYLPPYSPDLNKIERSWSWIKSRIR"
/note="IS630 e-value= 1.1e-13 fragment hit coverage=
38.83%, between model( 376 aa) positions 188; 333 length
is 129aa with 20 gaps, 0 stops, absolute frame= Minus1"
CDS complement(4716020..4715806)
/colour="255 0 0"
/evidence=predicted
/translation="REIHEAIGVSIRTIERVMRFVEEG---LEAAINQRsGAGRKRK
IQGEQEAHLIALRCSEPPVG----HARWTLRLLAD"
/note="IS630 e-value= 9.9e-08 fragment hit coverage=
20.74%, between model( 376 aa) positions 44; 121 length
is 72aa with 7 gaps, 0 stops, absolute frame= Minus1"
CDS complement(4612568..4612411)
/colour="255 0 0"
/evidence=predicted
/translation="HHPHPRVQRRMEVLYLKSQGLPHAQICQLCQISRPTLAKTLRLY
QGGIEGLK"
/note="IS481 e-value= 1.1e-08 fragment hit coverage=

```

15.10%, between model( 351 aa) positions 1; 53 length is 53aa with 0 gaps, 0 stops, absolute frame= Minus1"

CDS complement(4319990..4319854)  
/colour="255 0 0"  
/evidence=predicted  
/translation="WQTDGWEGYARQLPDE---VVHEVSKALTQRLERTNGIVRQQTGRWHRR"

/note="IS1\_ORF2 e-value= 1.8e-11 fragment hit coverage= 20.68%, between model( 237 aa) positions 164; 212 length is 46aa with 3 gaps, 0 stops, absolute frame= Minus1"

CDS complement(4252406..4251982)  
/colour="255 0 0"  
/evidence=predicted  
/translation="GRQRFNVLGALNAVTKEvTSITNHTYINSHSMCLLLAKLALLDPVI--PISVILDNARYQKCQLVTDFAEIVD--IELVYLPSYSPHLNLIERLWRFVVRKECLYSKYYSDFHSEFKGAIQQCIDQCNTTEHKAKLTSLLSLKFQSFQK"

/note="IS630 e-value= 6.2e-18 fragment hit coverage= 38.56%, between model( 376 aa) positions 232; 376 length is 142aa with 4 gaps, 0 stops, absolute frame= Minus1"

CDS complement(4222007..4221850)  
/colour="255 0 0"  
/evidence=predicted  
/translation="HHPHPRVQRMEVLYLKSQGLPHAQICQLCQISRPTLAKTLRLYQQGGIEGLK"

/note="IS481 e-value= 1.1e-08 fragment hit coverage= 15.10%, between model( 351 aa) positions 1; 53 length is 53aa with 0 gaps, 0 stops, absolute frame= Minus1"

CDS complement(4221497..4221091)  
/colour="255 0 0"  
/evidence=predicted  
/translation="MLLVRPISTESLRLHRIYHSSRHHQVRQRAHCLILFAQGWPPYTLASLFSVSPKTVYNWLKAWNNRG---FAGLYNHPRGRKPMFNPDQQQIYEWTPAQASPIQ-----LNQVLAQIEQQWSVRVSKATVKRVLKQMDMSWHR"

/note="IS630 e-value= 8.7e-15 fragment hit coverage= 39.63%, between model( 376 aa) positions 1; 149 length is 136aa with 13 gaps, 0 stops, absolute frame= Minus1"

CDS complement(4221437..4221100)  
/colour="255 0 0"  
/evidence=predicted  
/translation="SSRHHQVRQRAHCLILFAQGWPPYTLASLFSVSPKTVYNWLKAWNNRGFAGLYNH---PGRGRKPMFNPDQQQIYEWTPAQASPIQLNQVLAQIEQQWSVR--VSKATVKRVLKQMDMS"

/note="IS481 e-value= 3.5e-09 fragment hit coverage= 33.62%, between model( 351 aa) positions 1; 118 length is 113aa with 6 gaps, 0 stops, absolute frame= Minus1"

CDS complement(4218878..4218454)  
/colour="255 0 0"  
/evidence=predicted  
/translation="GRQRFNVLGALNAVTKEvTSITNHTYINSHSMCLLLAKLALLDPVI--PISVILDNARYQKCQLVTDFAEIVD--IELVYLPSYSPHLNLIERLWRFVVRKECLYSKYYSDFHSEFKGAIQQCIDQCNTTEHKAKLTSLLSLKFQSFQK"

/note="IS630 e-value= 6.2e-18 fragment hit coverage= 38.56%, between model( 376 aa) positions 232; 376 length is 142aa with 4 gaps, 0 stops, absolute frame= Minus1"

CDS complement(4135019..4134772)  
/colour="255 0 0"  
/evidence=predicted  
/translation="MQCPLCGHPT-THXHGKTSKGSQRYRCLHCXRTFSEtfdTLYYHQISPTLQTLQSHAEGSSLRGLARITGVAYNTCVSVVR"

/note="IS1\_ORF1 e-value= 2.5e-12 fragment hit coverage=

34.31%, between model( 239 aa) positions 6; 87 length is 83aa with 1 gaps, 2 stops, absolute frame= Minus1"

CDS complement(4135019..4134334)  
/colour="255 0 0"  
/evidence=predicted  
/translation="-----MQCPLCGHPT-THXHGKTSKGSQRYRCLHCXRTFSEtFD  
TLYYHRQISPQTLQITILQSHAEGSSLRGLARITGVAYNTCVSVVRSAA--SHKAQMIHN  
Q-----EGQAVSTDVinADALWSFVKKSksTVNRKNXASAIAGXRX-----VLP  
KTVAXCS--VVVLANIPTSSLKHXLRILKAKPPVtIGKRMVETVTHANYPMRXSItxV  
RPNRNAXSgpmeyyGNRPGAGIDDKTNLV-KSGNRV"  
/note="IS1\_ORF1 e-value= 1.6e-06 complete sequence hit  
coverage= 100%, between model( 239 aa) positions 1; 239  
length is 229aa with 25 gaps, 10 stops, absolute frame=  
Minus1"

CDS complement(4134977..4134790)  
/colour="255 0 0"  
/evidence=predicted  
/translation="GKTSKGSQRYRCLHCXRTFSETFdtLYYHRQisPQTLQITILQSH  
AEGSSLRGLARITGVAYNT"  
/note="IS1\_ORF2 e-value= 4.3e-06 fragment hit coverage=  
24.89%, between model( 237 aa) positions 21; 79 length is  
63aa with 0 gaps, 1 stops, absolute frame= Minus1"

CDS complement(3406541..3406153)  
/colour="255 0 0"  
/evidence=predicted  
/translation="FFMDESGFSLVPCIPY-GWQPIG-----TYL-EIPT  
RSSKRLNVLGFLSRROGL--HAYTSEQTITSEVVShCIDTFFADV--ELPTVIVVDQA  
PIHTSQsiyEMKAWEAERG--ITLFELPSYSPHLNLIERLWQFMKYQWI"  
/note="IS630 e-value= 6.5e-11 fragment hit coverage=  
39.10%, between model( 376 aa) positions 187; 333 length  
is 130aa with 21 gaps, 0 stops, absolute frame= Minus1"

CDS complement(2707001..2705968)  
/colour="255 0 0"  
/evidence=predicted  
/translation="QRFIQGLSPETIHLLSRIHRHSYHHQVRQRAHCILLSFEGFNVT  
ELMSIFAVTRKTVYTWLDDWDNHC---LVGLYDQPGRGRKPKLNDVQ-KEQIRAWAKM  
TP-----HNLNAVLAKEAWNIAVSKTTLKRILKSCSMSWRRLRRRVVAGQDPD  
VEYETK-----RHQLEVLKRQEEKGELdlrYLDESGFCLVPYVPY-AWQEKG-----  
-----ETLGLPSQRSSRFNVLGLMNRHNDL-TSYVFDKSITSAVVVACIDDFSRT  
C--DQHTVVVMDQASVHKNAEIEEKIEDWKakNVEIFWLPTYSPHLNLIEIFWRFMKY  
EWIEFAAYKCLGSLSLYIDKILKGFgKDYVIDFGXVLTKAVFISDIY"  
/note="IS630 e-value= 1.1e-19 complete sequence hit  
coverage= 100%, between model( 376 aa) positions 1; 376  
length is 345aa with 36 gaps, 1 stops, absolute frame=  
Minus1"

CDS complement(2707001..2706100)  
/colour="255 0 0"  
/evidence=predicted  
/translation="QRFIQGLSPETIHLLSRIHRHSYHHQVRQRAHCILLSFEGFNVT  
ELMSIFAVTRKTVYTWLDDWDNHC---LVGLYDQPGRGRKPKLNDVQ-KEQIRAWAKM  
TP-----HNLNAVLAKEAWNIAVSKTTLKRILKSCSMSWRRLRRRVVAGQDPD  
VEYETK-----RHQLEVLKRQEEKGELdlrYLDESGFCLVPYVPY-AWQEKG-----  
-----ETLGLPSQRSSRFNVLGLMNRHNDL-TSYVFDKSITSAVVVACIDDFSRT  
C--DQHTVVVMDQASVHKNAEIEEKIEDWKakNVEIFWLPTYSPHLNLIEIFWRFMKY  
EWI"  
/note="IS630 e-value= 1.1e-24 fragment hit coverage=  
88.56%, between model( 376 aa) positions 1; 333 length is  
301aa with 36 gaps, 0 stops, absolute frame= Minus1"

CDS complement(2587106..2586868)  
/colour="255 0 0"

```

/evidence=predicted
/translation="RNQQHYIROQLTAIKLLNEGHSRTQVSEQVGCSDTLTRWMDKY
LDGGLOGLVQPI--RHQKPSRLSPREEQQQLKEMVLTQR"
/note="IS481 e-value= 1.2e-07 fragment hit coverage=
23.36%, between model( 351 aa) positions 1; 82 length is
80aa with 2 gaps, 0 stops, absolute frame= Minus1"
CDS complement(2587079..2586673)
/colour="255 0 0"
/evidence=predicted
/translation="RLTAIKLLNEGHSRTQVSEQVGCSDTLTRWMDKYLDGG---LQ
GLVQPIRHQKPSRLSPREEQQQLKEMVLTQRPTDYGIDRNMWTGAILAVVIEQRFEVQL
KDSRIYELLSELGLSYQRAHRDYA--NADLNAQKEWVAA"
/note="IS630 e-value= 1.9e-29 fragment hit coverage=
37.50%, between model( 376 aa) positions 30; 170 length
is 136aa with 5 gaps, 0 stops, absolute frame= Minus1"
CDS complement(2498918..2498134)
/colour="255 0 0"
/evidence=predicted
/translation="CLAAXPNATLSHFQQSMKCLYCVIM--EHNSTHCLPLMGRRHQI
KALSQSNRRLKMGLIGFTRSWISPNELNLHRWHQEVEEXAASSKRLFKEK-----XVKLS
RYXsVNTQTLDRTXRAMPTAYDSDLTTLQWELLEPLIPAAKP-GGRPRT-TDMLSVLN
AIFYLVVTGCQWRQLPHDFPCWSTVYSYFRRWRDDGTWVHINEHLRMQERVSE-----
-----DRHPSPSAAICDAQSVKVG NPRCHSIGFDGgkmv
KGRKRHVLDVTLGLVL-MVMVTAAN"
/note="IS5_IS427 e-value= 7.3e-07 complete sequence hit
coverage= 100%, between model( 296 aa) positions 1; 296
length is 262aa with 39 gaps, 5 stops, absolute frame=
Minus1"
CDS complement(2498615..2497765)
/colour="255 0 0"
/evidence=predicted
/translation="TQTLDRTXRAM-----PTAYDSDLTTLQWELLEPLIPAAK-----
---PGGRPRTTDMLSVLN AIFYLVVTGCQWRQLPHDFPCWSTVYSYFRRWRDDGTWVH
INEHLRMQERVSEDRHPSPSAAICDAQSVKVG NPRCH-SIGFDGgkmvKGRKRHVLDV
TLGLVLMVMVTAANISDQR-GAKILFWKARRQGaslSRLVRIWADAGYQGQALMKWVM
DRSQYVLEVIKRS DNLAGFQVVS KRWIVERTFGWLLWSRRLNKDYEV LTRTAEALVYV
AMIRLMVRR LAQEHXNFSNLX"
/note="IS5_IS1031 e-value= 3.2e-108 complete sequence hit
coverage= 100%, between model( 295 aa) positions 1; 295
length is 284aa with 14 gaps, 3 stops, absolute frame=
Minus1"
CDS complement(2498573..2497765)
/colour="255 0 0"
/evidence=predicted
/translation="YDSDLTTLQWELLEPLIPAAK-----PGGRPRTTDMLSVLNA
IFYLVVTGCQWRQLPHDFPCWSTVYSYFRRWRDDGTWVHINEHLRMQERVSEDRHPS
SAAICDAQSVKVG NPRCH-SIGFDGgkmvKGRKRHVLDVTLGLVLMVMVTAANISDQR
-GAKILFWKARRQGaslSRLVRIWADAGYQGQALMKWVMDRSQYVLEVIKRS DNLAGF
QVVS KRWIVERTFGWLLWSRRLNKDYEV LTRTAEALVYVAMIRLMVRR LAQEHXNFS
SLX"
/note="IS5_IS1031 e-value= 2.1e-110 fragment hit
coverage= 93.56%, between model( 295 aa) positions 20;
295 length is 270aa with 9 gaps, 2 stops, absolute frame=
Minus1"
CDS complement(2498564..2498326)
/colour="255 0 0"
/evidence=predicted
/translation="DLTTLQWELLEPLIPAAKP-GGRPRT-TDMLSVLN AIFYLVVTG
CQWRQLPHDFPCWSTVYSYFRRWRDDGTWVHINEHLRM"
/note="IS5_IS427 e-value= 3.3e-18 fragment hit coverage=

```

27.70%, between model( 296 aa) positions 125; 206 length is 80aa with 2 gaps, 0 stops, absolute frame= Minus1" complement(2405255..2405098) /colour="255 0 0" /evidence=predicted /translation="HHPHPRVQRRMEVLYLKSQGLPHAQICQLCQISRPTLAKTLRLY QGGIEGLK" /note="IS481 e-value= 1.1e-08 fragment hit coverage= 15.10%, between model( 351 aa) positions 1; 53 length is 53aa with 0 gaps, 0 stops, absolute frame= Minus1" complement(2383214..2382808) /colour="255 0 0" /evidence=predicted /translation="MLLVRPISTESLRLHRIYHSSRHHQVRQRAHCLILFAQGWPY TLASLFSVSPKTVYNWLKAWNNRG---FAGLYNHPPGRGRKPMFNPDQQQIYEWTOA SPIQ-----LNQVLAQIEQQWSVRVSKATVKRVLKQMDMSWHR" /note="IS630 e-value= 8.7e-15 fragment hit coverage= 39.63%, between model( 376 aa) positions 1; 149 length is 136aa with 13 gaps, 0 stops, absolute frame= Minus1" complement(2383154..2382817) /colour="255 0 0" /evidence=predicted /translation="SSRHHQVRQRAHCLILFAQGWPYTLASLFSVSPKTVYNWLKAW NNRGFAGLYNH---PGRGRKPMfNPDQQQIYEWTOASPIQLNQVLAQIEQQWSVR-- -VSKATVKRVLKQMDMS" /note="IS481 e-value= 3.5e-09 fragment hit coverage= 33.62%, between model( 351 aa) positions 1; 118 length is 113aa with 6 gaps, 0 stops, absolute frame= Minus1" complement(2285066..2284843) /colour="255 0 0" /evidence=predicted /translation="SQMSTLTCPNCRSQN-VVKNGRIHNGKQNHKCKTCGRQFV--EA PQQKRIDSSTKGLIDKLLLEKIPLAGIARVCDVS" /note="IS1\_ORF1 e-value= 3.6e-14 fragment hit coverage= 32.64%, between model( 239 aa) positions 1; 78 length is 75aa with 3 gaps, 0 stops, absolute frame= Minus1" complement(1924193..1923499) /colour="255 0 0" /evidence=predicted /translation="FKHLHLGMIIsDIKRKSLPAIARAVGLENHQSLHHLFSESPWVAS hLSDkRLDIILKILDGRRLILLID-----ETGDCKKGKSTDYVKR QYIGNVGKKENGIvAVTAYGLFQGMILPLSFEVYKPR-----ErLKEEDEYLSK PQIAAGMIRQLQGMGFCFELVLADSLYGEAQTNFVNVLEELKLPYILAIRSNHAVWLP AEQAVFAEPWQSFERTFSNGTTETRYrQEIIYGqrhhQKRY" /note="IS4 e-value= 4.7e-14 fragment hit coverage= 51.23%, between model( 486 aa) positions 1; 249 length is 232aa with 27 gaps, 0 stops, absolute frame= Minus1" complement(1924193..1923067) /colour="255 0 0" /evidence=predicted /translation="FKHLHLGMIIsDIKRKSLPAIARAVGLENHQSLHHLFSESPWVAS hLSDkRLDIILKILDGRRLILLID-----ETGDCKKGKSTDYVKR QYIGNVGKKENGIvAVTAYGLFQGMILPLSFEVYKPR-----ErLKEEDEYLSK PQIAAGMIRQLQGMGFCFELVLADSLYGEAQTNFVNVLEELKLPYILAIRSNHAVWLP AEQAVFAEPWQSFERTFSNGT-----TETRYR QEIIYGQRHHQKRYWLLTTDPQTLPENSTS-----YVMAA APE----IKLDEIGDCYGFRTWIEYGLKQSKD-TLGWADFRMTHYEQIEKWWEIVMSA FLMVSLFADVFNDS-----CPVAHQHFAQHPwWDNONG WKNLLNNVR--LIIQPLIS----WNLLKRWLEVFPSRALKKGF" /note="IS4 e-value= 9.9e-07 complete sequence hit



coverage= 100%, between model( 486 aa) positions 1; 486 length is 376aa with 117 gaps, 0 stops, absolute frame= Minus1"

CDS complement(1895579..1895383)  
/colour="255 0 0"  
/evidence=predicted  
/translation="ASPIELSQQQHHCLTQIVRQTTNPYRLVRRASIILSAAGESNT QISRQQLDRNQVRYWRQRWLD"  
/note="IS630 e-value= 4e-07 fragment hit coverage= 17.55%, between model( 376 aa) positions 1; 66 length is 66aa with 0 gaps, 0 stops, absolute frame= Minus1"

CDS complement(1336244..1335394)  
/colour="255 0 0"  
/evidence=predicted  
/translation="TQTLDRTXRAM-----PTAYDSLTAEQWELLEPLIPAAK-----PGRPRTTDMRSVLNAILYLVTGQWRQLPHDFPCWSTVYSYFRRWRDDGTWVH INEHLRMQERVSEDRHPSRAAICDAQSVKVG NPRCH-SIGFDGGKQIKGRKRHVLDV TLGLVLMVIVTAANISDQR-GAKILFWKARRQGaslSRLVRIWADAGYQGQAFMKWVM DRFQYVLEVIKRSNDLAGFQVVPKRWIVERTFGWLLWSRRLNKDYELLTRTAEALAYV AMIRLMVRRRLAQEYXNFSNLX"  
/note="IS5\_IS1031 e-value= 3e-112 complete sequence hit coverage= 100%, between model( 295 aa) positions 1; 295 length is 284aa with 14 gaps, 3 stops, absolute frame= Minus1"

CDS complement(1336202..1335394)  
/colour="255 0 0"  
/evidence=predicted  
/translation="YDSLTAEQWELLEPLIPAAK-----PGRPRTTDMRSVLNAILYLVTGQWRQLPHDFPCWSTVYSYFRRWRDDGTWVH INEHLRMQERVSEDRHPS RAAICDAQSVKVG NPRCH-SIGFDGGKQIKGRKRHVLDVTLGLVLMVIVTAANISDQR -GAKILFWKARRQGaslSRLVRIWADAGYQGQAFMKWVM DRFQYVLEVIKRSNDLAGF QVVPKRWIVERTFGWLLWSRRLNKDYELLTRTAEALAYVAMIRLMVRRRLAQEYXNFSN SLX"  
/note="IS5\_IS1031 e-value= 2.4e-114 fragment hit coverage= 93.56%, between model( 295 aa) positions 20; 295 length is 270aa with 9 gaps, 2 stops, absolute frame= Minus1"

CDS complement(1336193..1335955)  
/colour="255 0 0"  
/evidence=predicted  
/translation="DLTAEQWELLEPLIPAAKP-GGRPRT-TDMRSVLNAILYLVTG CQWRQLPHDFPCWSTVYSYFRRWRDDGTWVH INEHLRM"  
/note="IS5\_IS427 e-value= 1.2e-20 fragment hit coverage= 27.70%, between model( 296 aa) positions 125; 206 length is 80aa with 2 gaps, 0 stops, absolute frame= Minus1"

CDS complement(1225547..1225171)  
/colour="255 0 0"  
/evidence=predicted  
/translation="EHRKSEDFALCMQYLVDGLFPQADKLHVVDNLNTHspaalyKT FNPDEALRILK-RIQFHYPKHG SWLNMIEFEFSALSROCLNRRIP-DIEQLRYEVTA WEKRRNHDKATVNWLF TVDDARTKLS"  
/note="IS630 e-value= 2.3e-07 fragment hit coverage= 32.45%, between model( 376 aa) positions 255; 376 length is 126aa with 2 gaps, 0 stops, absolute frame= Minus1"

CDS complement(1184315..1183279)  
/colour="255 0 0"  
/evidence=predicted  
/translation="PMIKIDFTAEEIQQLNYERYHHHPHPRVQRRMEVLYLKSQGLSHT QICQLCQISRPTLAKTLRQYQGG---IEGLKTLEYKQPSLLNAHS-DSVRAYFEQH PP-----RTSAEAQAVIEQLTG IKRSP TQIKAF LKRIGCRYRKVGYVPGKSSLP

```

-EKIEEQEQFRHTRLEPLleeAQRQERLVFFVDAAHFVHRAYLGF-VWCITRI-----
-----FIPSPS-GRQRFNVLGALDAITKDLVSVTNHTYINSHSMCLLLAKLALL
DPV-IPISVILDNARYQKCQLVTDFAEIVD--IELVYLPSYSRHLNLIERLWRFVVRKE
CLYSKYYADFPAPFKGAIQQCIDQCNGEHKAKLTLLSLKQSFKK"
/note="IS630 e-value= 3.5e-21 complete sequence hit
coverage= 100%, between model( 376 aa) positions 1; 376
length is 346aa with 33 gaps, 0 stops, absolute frame=
Minus1"
CDS complement(1184315..1183279)
/colour="255 0 0"
/evidence=predicted
/translation="PMIKIDFTAEEIQQLNYERYHHPHPRVQRRMEVLYLKSQGLSHT
QICQLCQISRPTLAKTLRQYQGG---IEGLKTLEYKQGPSLLNAHS-DSVRAYFEQH
PP-----RTSAEAQAVIEQLTGIKRSPTQIKAFKLRIGCRYRKVGVYVPGKSSLP
-EKIEEQEQFRHTRLEPLleeAQRQERLVFFVDAAHFVHRAYLGF-VWCITRI-----
-----FIPSPS-GRQRFNVLGALDAITKDLVSVTNHTYINSHSMCLLLAKLALL
DPV-IPISVILDNARYQKCQLVTDFAEIVD--IELVYLPSYSRHLNLIERLWRFVVRKE
CLYSKYYADFPAPFKGAIQQCIDQCNGEHKAKLTLLSLKQSFKK"
/note="IS630 e-value= 3.1e-22 complete sequence hit
coverage= 100%, between model( 376 aa) positions 1; 376
length is 346aa with 33 gaps, 0 stops, absolute frame=
Minus1"
CDS complement(1184255..1184098)
/colour="255 0 0"
/evidence=predicted
/translation="HHPHPRVQRRMEVLYLKSQGLSHTQICQLCQISRPTLAKTLRQY
QGGIEGLK"
/note="IS481 e-value= 3.7e-09 fragment hit coverage=
15.10%, between model( 351 aa) positions 1; 53 length is
53aa with 0 gaps, 0 stops, absolute frame= Minus1"
CDS complement(1119713..1118947)
/colour="255 0 0"
/evidence=predicted
/translation="--IYPSFITLGRXKNRLDLLHnxvcdMVLSHSNAGRPPKLCRP
DQLLVALQDWREYRTYFHIAGDWGVSESTVCRIVQQVetaHELRTLP----PTRQETS
NTRIXAAXCCRDGCDXDTDXTSpKRTKSVLCRKKRHTLKCQIIADRNTLEIICLSFG
KRRRHDFQVFKVSGVHIHPDTESELLDSGYQG-----NSYVPLKKPQQGELTSLEREY
NHALSQERIGIEHINRSLKMFRI LSERYCNR RRRRYS LR CNL IAAIYNYEL"
/note="IS5_ISL2 e-value= 6.5e-76 complete sequence hit
coverage= 100%, between model( 260 aa) positions 1; 260
length is 256aa with 12 gaps, 5 stops, absolute frame=
Minus1"
CDS complement(1119629..1118947)
/colour="255 0 0"
/evidence=predicted
/translation="SHSNAGRPPKLCRPDQLLVALQDWREYRTYFHIAGDWGVSESTV
CRIVQQVetaHELRTLP----PTRQETS NTRIXAAXCCRDGCDXDTDXTSpKRTKSVL
CRKKRHTLKCQIIADRNTLEIICLSFGKRRRHDFQVFKVSGVHIHPDTESELLDSGYQ
G-----NSYVPLKKPQQGELTSLEREYNHALSQERIGIEHINRSLKMFRI LSERYCN
RRRYS LR CNL IAAIYNYEL"
/note="IS5_ISL2 e-value= 1.1e-77 fragment hit coverage=
90.38%, between model( 260 aa) positions 26; 260 length
is 228aa with 10 gaps, 4 stops, absolute frame= Minus1"
CDS complement(826598..826267)
/colour="255 0 0"
/evidence=predicted
/translation="QRVKDRAAMIRLSHQGMYVEKIAALFQCNVRTVROT LHRWQKG
---LGGLWDAPHPGAQRRWNPED-IEYLETCLRQEERTY-----NSQQLSOKLAKE
RNVHLSADRIRQILKRGXS"
/note="IS630 e-value= 8.8e-10 fragment hit coverage=

```

32.45%, between model( 376 aa) positions 25; 146 length is 111aa with 11 gaps, 1 stops, absolute frame= Minus1" complement(741935..741721) /colour="255 0 0" /evidence=predicted /translation="REIHEAIGVSIERTIERVVRMRFVEEG---LEAAINQRsGAGRKRK IQEEQEAHLIALRCSEPPVG----HARWTLRLLAD" /note="IS630 e-value= 2.5e-08 fragment hit coverage= 20.74%, between model( 376 aa) positions 44; 121 length is 72aa with 7 gaps, 0 stops, absolute frame= Minus1" complement(669422..669199) /colour="255 0 0" /evidence=predicted /translation="SQMSTLTCPNCRSQN-VVKNGRIHNGKQNHKCKTCGRQFV--EA PQQKRIDSSTKGLIDKLLLEKIPLAGIARVCDVS" /note="IS1\_ORF1 e-value= 3.6e-14 fragment hit coverage= 32.64%, between model( 239 aa) positions 1; 78 length is 75aa with 3 gaps, 0 stops, absolute frame= Minus1" complement(517589..517393) /colour="255 0 0" /evidence=predicted /translation="GKHKQILLVLDGAGWHTC---KNRVVPPG--IHLKILPPYSPEL QPAERLWRLADEPLAN-QCFETLDDLED" /note="IS630 e-value= 1.4e-09 fragment hit coverage= 19.15%, between model( 376 aa) positions 275; 346 length is 66aa with 6 gaps, 0 stops, absolute frame= Minus1" complement(481079..480364) /colour="255 0 0" /evidence=predicted /translation="YLSPEL-LXCRASSKVSMXSTVGSPPS-----ILARISDL FPHCWRLGSLXINRLPYCpGRDRSDELRTLSLTRSEISATR-----VRATGCR CDGCDXNAHXTSPDKTKSVLF----RKKKRHTFKYQIIANRNTLEIICLNVGPGRRHD FQIFKVSIGIHIHPDTESLQDSGYQGIAAYHTNSYVPLKKPQHGELETSLQREYNRALSQ ERMGIEHINRSLKIFRILSERYRNRRRRYALRCNLIAAIYNYEL" /note="IS5\_ISL2 e-value= 1e-38 complete sequence hit coverage= 100%, between model( 260 aa) positions 1; 260 length is 239aa with 23 gaps, 5 stops, absolute frame= Minus1" complement(480764..480364) /colour="255 0 0" /evidence=predicted /translation="KKKRHTFKYQIIANRNTLEIICLNVGPGRRHDFQIFKVSIGIHIHPDTESLQDSGYQGIAAYHTNSYVPLKKPQHGELETSLQREYNRALSQERMGIEHINRSLKIFRILSERYRNRRRRYALRCNLIAAIYNYEL" /note="IS5\_ISL2 e-value= 2.5e-62 fragment hit coverage= 51.54%, between model( 260 aa) positions 127; 260 length is 134aa with 0 gaps, 0 stops, absolute frame= Minus1" complement(476648..475171) /colour="255 0 0" /evidence=predicted /translation="DSYHTRVYMNGRDLGLKQAEAAAYIAEISTRGQRIEAGTHQPNR -GRLQD-----QRTVPDPLADVWE---DELEPMLRRDPRLKPMPLYEYLQD-KYPG QYPQVlrtlQRRVRTWKALHGPS-----PEVMFELRHEPGVQGFSGFTELKGITITIA GQPFEHLIYHYRLGYSGWRYAQIIQGgESFVALSEGLQNAFAACGGVPPQHRDLSLA AYRNMGRRS-KNLTRLYDELCDHYRLEPTRNNKG--IAHENGSIESPHGHLKNRIKQ AIYLRGSAD-----FTSVAEYQALIDAQVAKLNQOCQTK-----YEQEKDHLQPLPK YRTPDYEVLTATA----KVSKRSTIDVRCILYTVPSRLIGRQLELHLYHDRVGYLERHP VVELPRKRVSGkGKRRDRCINRHHVIGSMRLKPRAFIYCTWQSDLLPNPEYRQIWEQL KAQFDLEQAAKIIVEALYIAAVQDKEQAVAVYLOQLOQASSLTLNRLKKQFEPQMKQ VPDLSieQHS----LELYDKLLPS"

```

/note="IS21_ORF1 e-value= 5e-20 complete sequence hit
coverage= 100%, between model( 525 aa) positions 1; 525
length is 493aa with 39 gaps, 0 stops, absolute frame=
Minus1"
CDS complement(476378..475549)
/colour="255 0 0"
/evidence=predicted
/translation="QYPQVLRTLQRRVRTWKALHGPS-----PEVMFELRHEPGVQGF
SGFTELKGITITIAGQPFEHLIYHYRLGYSGWRYAQIIQGgESFVALSEGLQNAFAAC
GGVPPQHRDLSLSAAYRNMGGRRS-KNLTRLTYDELCDHYRLEPTRNNKG--IAHENG
IESPHGHLKNRIKQAIYLRGSAD-----FTSVAEYQALIDAQVAKLNQOCQTK-----
-YEQEKDHLQPLPKYRTPDYEVLT-----KVSKRSTIDVRCILYTVPSRLIGRQLELH
LYHDRIVGY-----LERHPVVELPRKRVS"
/note="IS21_ORF1 e-value= 3.2e-28 fragment hit coverage=
57.90%, between model( 525 aa) positions 99; 402 length
is 277aa with 28 gaps, 0 stops, absolute frame= Minus1"
CDS complement(408932..408064)
/colour="255 0 0"
/evidence=predicted
/translation="EKXVKLSRYXSVNTQTLDRTXramptaYDSDLTTLQWELLEPLI
PAAKPG-----GRPRTDML-----SVLNAIFYLVVTCQWRQ
--LPHDFPCWSTVYSYFRRWRDDGTWSQINEHLRMQVRVSED---RHSPSAAICDAQ
SVK-----VGNpRcHLIGFD-----GGKM-
-----VKGRKRHVLD-TL
GLVLMVMVTAANISDQRGAK-----ILFWKAQRQGASLSRL
VR----IWADAGYQGQALMKWMDRFQYVLEVIKRSNDLAGFQVVPKRWIVERTFGWL
LWSRRLNKDYEVLTRTAEALVYVAMIRLMVRRLAQEHX"
/note="IS5_IS5 e-value= 1.3e-09 complete sequence hit
coverage= 100%, between model( 422 aa) positions 1; 422
length is 290aa with 140 gaps, 4 stops, absolute frame=
Minus1"
CDS complement(408893..408043)
/colour="255 0 0"
/evidence=predicted
/translation="TQTLDRTXRAM-----PTAYDSDLTTLQWELLEPLIPAAK----
---PGGRPRTDMLSVLNAIFYLVVTCQWRQLPHDFPCWSTVYSYFRRWRDDGTWSQ
INEHLRMQVRVSEDRHSPSAAICDAQSVKVG NPRCH-LIGFDGGKMVKGRKRHVLD
TLGLVLMVMVTAANISDQR-GAKILFWKAQRQGasLSRLVRIWADAGYQGQALMKWV
DRFQYVLEVIKRSNDLAGFQVVPKRWIVERTFGWLLWSRRLNKDYEVLTRTAEALVY
AMIRLMVRRLAQEHXNFSNLL"
/note="IS5_IS1031 e-value= 4.2e-111 complete sequence hit
coverage= 100%, between model( 295 aa) positions 1; 295
length is 284aa with 14 gaps, 2 stops, absolute frame=
Minus1"
CDS complement(408851..408043)
/colour="255 0 0"
/evidence=predicted
/translation="YDSDLTTLQWELLEPLIPAAK-----PGGRPRTDMLSVLNA
IFYLVVTCQWRQLPHDFPCWSTVYSYFRRWRDDGTWSQINEHLRMQVRVSEDRHSP
SAAICDAQSVKVG NPRCH-LIGFDGGKMVKGRKRHVLDTLGLVLMVMVTAANISDQR
-GAKILFWKAQRQGasLSRLVRIWADAGYQGQALMKWMDRFQYVLEVIKRSNDLAGF
QVVPKRWIVERTFGWLLWSRRLNKDYEVLTRTAEALVYVAMIRLMVRRLAQEHXNFSN
SLL"
/note="IS5_IS1031 e-value= 2.8e-113 fragment hit
coverage= 93.56%, between model( 295 aa) positions 20;
295 length is 270aa with 9 gaps, 1 stops, absolute frame=
Minus1"
CDS complement(408842..408604)
/colour="255 0 0"
/evidence=predicted

```

```

/translation="DLTTLQWELLEPLIPAAKP-GGRPRT-TDMLSVLNAIFYLVVTG
CQWRQLPHDFPCWSTVYSYFRRWRDDGTSQINEHLRM"
/note="IS5_IS427 e-value= 2e-19 fragment hit coverage=
27.70%, between model( 296 aa) positions 125; 206 length
is 80aa with 2 gaps, 0 stops, absolute frame= Minus1"
CDS complement(129620..128584)
/colour="255 0 0"
/evidence=predicted
/translation="PMIKIDFTAEEIQQLNYERYHHPHPRVQRRMEVLYLKSQGLSHT
QICQLCQISRPTLAKTLRQYQGG---IEGLKTLEYKQPSLLNAHS-DSVRAYFEQH
PP-----RTSAEAQAVIEQLTGIKRSPTQIKAFKLRIGCRYRKVGVVPGKSSLP
-EKIEEQEQFRHTRLEPLleeAQRQERLVFFVDAAHFVHRAYLGF-VWCITRI-----
-----FIPSPS-GRQRFNVLGALDAITKDLVSVTNHTYINSHSMCLLLAKLALL
DPV-IPISVILDNARYQKCQLVTDFAEIVD--IELVYLPSYSPLNLIERLWRFVVRKE
CLYSKYYADFPAPFKGAIQQCIDQCNGEHKAKLTLLSLKFQSFKK"
/note="IS630 e-value= 4.9e-24 complete sequence hit
coverage= 100%, between model( 376 aa) positions 1; 376
length is 346aa with 33 gaps, 0 stops, absolute frame=
Minus1"
CDS complement(129620..128584)
/colour="255 0 0"
/evidence=predicted
/translation="PMIKIDFTAEEIQQLNYERYHHPHPRVQRRMEVLYLKSQGLSHT
QICQLCQISRPTLAKTLRQYQGG---IEGLKTLEYKQPSLLNAHS-DSVRAYFEQH
PP-----RTSAEAQAVIEQLTGIKRSPTQIKAFKLRIGCRYRKVGVVPGKSSLP
-EKIEEQEQFRHTRLEPLleeAQRQERLVFFVDAAHFVHRAYLGF-VWCITRI-----
-----FIPSPS-GRQRFNVLGALDAITKDLVSVTNHTYINSHSMCLLLAKLALL
DPV-IPISVILDNARYQKCQLVTDFAEIVD--IELVYLPSYSPLNLIERLWRFVVRKE
CLYSKYYADFPAPFKGAIQQCIDQCNGEHKAKLTLLSLKFQSFKK"
/note="IS630 e-value= 6.7e-25 complete sequence hit
coverage= 100%, between model( 376 aa) positions 1; 376
length is 346aa with 33 gaps, 0 stops, absolute frame=
Minus1"
CDS complement(129560..129403)
/colour="255 0 0"
/evidence=predicted
/translation="HHPHPRVQRRMEVLYLKSQGLSHTQICQLCQISRPTLAKTLRQY
QGGIEGLK"
/note="IS481 e-value= 3.7e-09 fragment hit coverage=
15.10%, between model( 351 aa) positions 1; 53 length is
53aa with 0 gaps, 0 stops, absolute frame= Minus1"
CDS complement(105725..105655)
/colour="255 0 0"
/evidence=predicted
/translation="HVHMLISIPPKYSVLNVMGYIKGK"
/note="IS200 e-value= 5.3e-11 fragment hit coverage=
15.58%, between model( 154 aa) positions 61; 84 length is
24aa with 0 gaps, 0 stops, absolute frame= Minus1"
CDS complement(105725..105655)
/colour="255 0 0"
/evidence=predicted
/translation="HVHMLISIPPKYSVLNVMGYIKGK"
/note="IS200_IS605 e-value= 2.1e-10 fragment hit
coverage= 15.69%, between model( 153 aa) positions 61; 84
length is 24aa with 0 gaps, 0 stops, absolute frame=
Minus1"
CDS complement(105725..105655)
/colour="255 0 0"
/evidence=predicted
/translation="HVHMLISIPPKYSVLNVMGYIKGK"

```

```

/note="IS605 e-value= 2.8e-08 fragment hit coverage=
15.79%, between model( 152 aa) positions 61; 84 length is
24aa with 0 gaps, 0 stops, absolute frame= Minus1"
CDS complement(100253..99016)
/colour="255 0 0"
/evidence=predicted
/translation="IRIPLNLPDI--RVLELSKTERGDWL-----IKIESTLQGTTC
HQCGREITDL-HCHDQ-PFRIRHLPLFEVPVYLEIRPKRYRCKYCDDhpTTTQHLEWH
EPRSPNTKAYERWLLRILIN-STVSDVARKLGVSEDIVSGIIDRWIAAQVDWSEYADL
KVMGMDEISLKRK--HR---DFVVLITIPtTdgVDILAVLADRKQQTVANFLQSIP-I
DLRQTIERVCTDMYQGFVSAVREQLPQAKIVIDRFHVTKAYRNCADTVRKREVKRLRR
ELS-----KQEYD-----SIKGAMWPFKRKPENLKES-EQOLLER
LFA--YSPQLKQAYNLREKLTQIFEGRYTKHGAKcAIRAWCKQVLKSDiKEFDCFLTT
INNWMDEMTNYFLEG-WTSGFVEGFNRRVKVLKRRCYGIFDIERLRFQRIISLDLNGYQT
FAVTXTL"
/note="ISL3 e-value= 1.8e-43 complete sequence hit
coverage= 100%, between model( 451 aa) positions 1; 451
length is 413aa with 44 gaps, 1 stops, absolute frame=
Minus1"
CDS complement(100094..99016)
/colour="255 0 0"
/evidence=predicted
/translation="RIRHLPLFEVPVYLEIRPKRYRCKYCDDhpTTTQHLEWHEPRSP
NTKAYERWLLRILIN-STVSDVARKLGVSEDIVSGIIDRWIAAQVDWSEYADLKVMGM
DEISLKRK--HR---DFVVLITIPtTdgVDILAVLADRKQQTVANFLQSIP-IDLRQT
IERVCTDMYQGFVSAVREQLPQAKIVIDRFHVTKAYRNCADTVRKREVKRLRRELS--
-----KQEYD-----SIKGAMWPFKRKPENLKES-EQOLLERLFA--
YSPQLKQAYNLREKLTQIFEGRYTKHGAKcAIRAWCKQVLKSDiKEFDCFLTTINNWM
DEMTNYFLEG-WTSGFVEGFNRRVKVLKRRCYGIFDIERLRFQRIISLDLNGYQTFAVTX
TL"
/note="ISL3 e-value= 1e-49 fragment hit coverage= 86.03%,
between model( 451 aa) positions 64; 451 length is 360aa
with 34 gaps, 1 stops, absolute frame= Minus1"
CDS complement(6333589..6332766)
/colour="255 0 0"
/evidence=predicted
/translation="XRIKXKNYILINSNXXKINIKLNYKLIKIRRXAF-----IGNEV
PIXLKXLNYXQLDKLXRLMQWLKKKLVKQRFKPTQLVXSIVEVvtlrtfplksaITX
RLFEXVKLSRYXsVNTQTLDRTXRAMPTAYDSDLTTLQWELLEPLIPAAKP-GGRPR
T-TDMLSVLNAIFYLVTGQWRQLPHDFPCWSTVYSYFRRWRDDGTWSQINEHLRMQ
VRVSE-----DRHPSPSAAICDAQSVkvgnpRCH
LIGFDGGKMKVGRKRHVLDVTLGLVLMVMVTAANIS"
/note="IS5_IS427 e-value= 2.1e-06 complete sequence hit
coverage= 100%, between model( 296 aa) positions 1; 296
length is 275aa with 37 gaps, 14 stops, absolute frame=
Minus2"
CDS complement(6333292..6332424)
/colour="255 0 0"
/evidence=predicted
/translation="EKXVKLSRYXSVNTQTLDRTXramptaYDSDLTTLQWELLEPLI
PAAKPG-----GRPRTDML-----SVLNAIFYLVTGQWRQ
--LPHDFPCWSTVYSYFRRWRDDGTWSQINEHLRMQVRVSED---RHPSPSAAICDAQ
SVK-----VGNpRcHLIGFD-----GGKM-
-----VKGRKRHVLD-TL
GLVLMVMVTAANISDQRGAK-----ILFWKAQRQGASLSRL
VR----IWADAGYQGOALMKWMDRFQYVLEVVKRSDNLAGFQVIPKRWIVERTFGWL
LWSRRLNKDYEVLTRTAEALVYVAMIRLMVRRLAQEHX"
/note="IS5_IS5 e-value= 1.8e-09 complete sequence hit
coverage= 100%, between model( 422 aa) positions 1; 422
length is 290aa with 140 gaps, 4 stops, absolute frame=

```

Minus2"

CDS complement(6333253..6332403)  
/colour="255 0 0"  
/evidence=predicted  
/translation="TQTLDRTXRAM-----PTAYDSLTTLQWELLEPLIPAAK-----  
---PGGRPRTDMLSVLNNAIFYLVVTCQWRQLPHDFPCWSTVYSYFRRWRDDGTWSQ  
INEHLRMQVRVSEDRHSPSPAICDAQSVKVG NPRCH-LIGFDGGKMKVGRKRHVLD  
TLGLVLMVMVTAANISDQR-GAKILFWKAQRQGaslSRLVRIWADAGYQGQALMKWVM  
DRFQYVLEVVKRSDNLAGFQVIPKRWIVERTFGWLLWSRRLNKDYEVLTRTAEALVYV  
AMIRLMVRRLAQEHNFSNSLL"  
/note="IS5\_IS1031 e-value= 3.6e-111 complete sequence hit  
coverage= 100%, between model( 295 aa) positions 1; 295  
length is 284aa with 14 gaps, 2 stops, absolute frame=  
Minus2"

CDS complement(6333211..6332403)  
/colour="255 0 0"  
/evidence=predicted  
/translation="YDSLTTLQWELLEPLIPAAK-----PGGRPRTDMLSVLNA  
IFYLVVTCQWRQLPHDFPCWSTVYSYFRRWRDDGTWSQINEHLRMQVRVSEDRHSP  
SAAICDAQSVKVG NPRCH-LIGFDGGKMKVGRKRHVLDTLGLVLMVMVTAANISDQR  
-GAKILFWKAQRQGaslSRLVRIWADAGYQGQALMKWVM DRFQYVLEVVKRSDNLAGF  
QVIPKRWIVERTFGWLLWSRRLNKDYEVLTRTAEALVYVAMIRLMVRRLAQEHNFSN  
SLL"  
/note="IS5\_IS1031 e-value= 2.4e-113 fragment hit  
coverage= 93.56%, between model( 295 aa) positions 20;  
295 length is 270aa with 9 gaps, 1 stops, absolute frame=  
Minus2"

CDS complement(6333202..6332964)  
/colour="255 0 0"  
/evidence=predicted  
/translation="DLTTLQWELLEPLIPAAKP-GGRPRT-TDMLSVLNNAIFYLVVTC  
CQWRQLPHDFPCWSTVYSYFRRWRDDGTWSQINEHLRM"  
/note="IS5\_IS427 e-value= 2e-19 fragment hit coverage=  
27.70%, between model( 296 aa) positions 125; 206 length  
is 80aa with 2 gaps, 0 stops, absolute frame= Minus2"

CDS complement(6280795..6279558)  
/colour="255 0 0"  
/evidence=predicted  
/translation="IRIPLNLPDI--RVLELSKTERGDWL-----IKIESTLQGTTC  
HQCGREITDL-HCHDQ-PFRIRHLPLFEVPVYLEIRPKRYRCKYCDDhpTTTQHLEWH  
EPRSPNTKAYERWLLRILIN-STVSDVARKLGVSEDIVSGIIDRWIAAQVDWSEYADL  
KVMGMDEISLKR--HR---DFVVLITIPTTdgVDILAVLADRKQQTVANFLQSIP-I  
DLRQTIERVCTDMYQGFVSAVREQLPQAKIVIDRFHVTKAYRNCADTVRKREVKRLRR  
ELS-----KQEYD-----SIKGAMWPFKRKPENLKES-EQOLLER  
LFA--YSPQLKQAYNLREKLTQIFEGRYTKHGAKcAIRAWCKQVLKSDiKEFDCFLTT  
INNWMDEMTNYFLEG-WTSGFVEGFNNRVKVLKRRRCYGFIDIERLRFQIRISLDLNGYQT  
FAVTXTL"  
/note="ISL3 e-value= 1.8e-43 complete sequence hit  
coverage= 100%, between model( 451 aa) positions 1; 451  
length is 413aa with 44 gaps, 1 stops, absolute frame=  
Minus2"

CDS complement(6280636..6279558)  
/colour="255 0 0"  
/evidence=predicted  
/translation="RIRHLPLFEVPVYLEIRPKRYRCKYCDDhpTTTQHLEWHEPRSP  
NTKAYERWLLRILIN-STVSDVARKLGVSEDIVSGIIDRWIAAQVDWSEYADLKVMGM  
DEISLKR--HR---DFVVLITIPTTdgVDILAVLADRKQQTVANFLQSIP-IDLRQT  
IERVCTDMYQGFVSAVREQLPQAKIVIDRFHVTKAYRNCADTVRKREVKRLRRELS--  
-----KQEYD-----SIKGAMWPFKRKPENLKES-EQOLLERLFA--  
YSPQLKQAYNLREKLTQIFEGRYTKHGAKcAIRAWCKQVLKSDiKEFDCFLTTINNWM

DEMTNYFLEG-WTSGFVEGFNNRVKVLKRRRCYGIFDIERLFQORISLDLNGYQTFVAVTX  
 TL"  
 /note="ISL3 e-value= 1e-49 fragment hit coverage= 86.03%,  
 between model( 451 aa) positions 64; 451 length is 360aa  
 with 34 gaps, 1 stops, absolute frame= Minus2"  
 CDS complement(6250273..6249804)  
 /colour="255 0 0"  
 /evidence=predicted  
 /translation="EAVYILDGLLKN--TSEIQPDTIHGDTQSQSCTVFALAFLLGIT  
 LMPRIRGWQNLAFYRPsRGTRYK--HLDSLFTVTDWDLIETHLPDMLRVALSIKDGK  
 VQASTLLRKLGTNSRKNKLFQAFHELGGVLRITIFLLQYINDPQMQETIHAETNKCEAF  
 N"

/note="Tn3 e-value= 2.6e-14 fragment hit coverage=  
 15.94%, between model( 1004 aa) positions 740; 899 length  
 is 157aa with 4 gaps, 0 stops, absolute frame= Minus2"  
 CDS complement(6238489..6238101)  
 /colour="255 0 0"  
 /evidence=predicted  
 /translation="FFMDESGFSLVPCIPY-GWQPIG-----TYL-EIPT  
 RSSKRLNVLGFLSRRQGL--HAYTSEQTITSEVVShCIDTFFADV--ELPTVIVVDQA  
 PIHTSQsiyEMKAEWAERG--ITLFEPLSPHNLIERLWQFMKYQWI"

/note="IS630 e-value= 6.5e-11 fragment hit coverage=  
 39.10%, between model( 376 aa) positions 187; 333 length  
 is 130aa with 21 gaps, 0 stops, absolute frame= Minus2"  
 CDS complement(6232594..6231831)  
 /colour="255 0 0"  
 /evidence=predicted  
 /translation="SPYQHLSLYLKKLRLSHMLTHWESIESQA-MQENWSYAEFLAL  
 CETEAQRREQARLKRALTEARLPNA-KSFTNFDFSHCPQLNPAPLMQLAAdPGWLER  
 ENCLILGPSGVGKTHLATGVSKKMLEFGKRVKFFAANALVQHLQOAKLQQLH-PMLK  
 KLDYDLLVLDLGYCKKSEAETSVLFELIAHRYERKSLITANQPFQWDDIFT-DS  
 MVAVAIDRLIHHGLIIKIQADSYRRKSATQRTAQTQSPPO"

/note="IS21\_ORF2 e-value= 1.3e-82 complete sequence hit  
 coverage= 100%, between model( 258 aa) positions 1; 258  
 length is 255aa with 4 gaps, 0 stops, absolute frame=  
 Minus2"  
 CDS complement(6232594..6231831)  
 /colour="255 0 0"  
 /evidence=predicted  
 /translation="SPYQHLSLYLKKLRLSHMLTHWESIESQA-MQENWSYAEFLAL  
 CETEAQRREQARLKRALTEARLPNA-KSFTNFDFSHCPQLNPAPLMQLAAdPGWLER  
 ENCLILGPSGVGKTHLATGVSKKMLEFGKRVKFFAANALVQHLQOAKLQQLH-PMLK  
 KLDYDLLVLDLGYCKKSEAETSVLFELIAHRYERKSLITANQPFQWDDIFT-DS  
 MVAVAIDRLIHHGLIIKIQADSYRRKSATQRTAQTQSPPO"

/note="IS21\_ORF2 e-value= 3.4e-83 complete sequence hit  
 coverage= 100%, between model( 258 aa) positions 1; 258  
 length is 255aa with 4 gaps, 0 stops, absolute frame=  
 Minus2"  
 CDS complement(6209392..6208452)  
 /colour="255 0 0"  
 /evidence=predicted  
 /translation="TKNRXPMSYQIRNWSEYNAGLKQRGSVTFWLEQS--AIVHWLET  
 TPRQKRGASLTYSDTAISTFETVKCIYGLAGRQTEGFLNSLFELMGIELPVCDDHSTVS  
 RRRKQLSISLPVIPKQGAIHVVIDSTGVKVG-----EGEWKTRQHGVS-K  
 RRTWRKLHLSVDESTGEILTGVVTTNDVQDGEVFEDLLEGIDD-----EIEQVSAD-G  
 AYDQSHCYDALMERNATAAIPPRKNA-----KIWQHGN--NApphpRDQ  
 NLRAIRKQGRKRWKKQAHYHRRSLAETTMFRFKTIFGGQVRSRNFNDQATELLLOCA  
 LN-RMIQIAKPETVWVE"

/note="IS5\_IS903 e-value= 1.1e-96 complete sequence hit  
 coverage= 100%, between model( 347 aa) positions 1; 347



```

length is 314aa with 37 gaps, 1 stops, absolute frame=
Minus2"
CDS      complement(6209392..6208452)
         /colour="255 0 0"
         /evidence=predicted
         /translation="TKNRXPMSYQIRNWSEYNAGLKQRGSVTFWLEQS--AIVHWLET
TPRQKRGASLTYSDTAISTFETVKCIYGLAGRQTEGFLNSLFELMGIELPVC DHSTVS
RRKGQLSISLPVIPKQGAIHVVIDSTGVKVG-----EGEWKTRQHGVS-K
RRTWRKLHLSVDESTGEILTGVVTTNDVQDGEVFE DLLEGGIDD-----EIEQVSAD-G
AYDQSHCYDALMERNATAAIPPRKNA-----KIWQHGN C--NApphpRDQ
NLRAIRKQGRKRWKKQAHYHRRSLAETTMFRFKTIFGGQVRSRNF DNQATELLLOCAA
LN-RMIQIAKPETVWVE"
         /note="IS5_IS903 e-value= 2.2e-96 complete sequence hit
coverage= 100%, between model( 347 aa) positions 1; 347
length is 314aa with 37 gaps, 1 stops, absolute frame=
Minus2"
CDS      complement(6167842..6167601)
         /colour="255 0 0"
         /evidence=predicted
         /translation="VKLAELIPWESFESEYADQFSQ---TMGAPAKPFRVALGTLIIK
EKLGISDAETVEQIRENPYLQYFLGFSEYRESAPFDASML"
         /note="IS5_IS5 e-value= 2.6e-06 fragment hit coverage=
19.91%, between model( 422 aa) positions 23; 106 length
is 81aa with 3 gaps, 0 stops, absolute frame= Minus2"
CDS      complement(6120718..6119784)
         /colour="255 0 0"
         /evidence=predicted
         /translation="CWVGIDVSKQNLDIHIRPSGH-----IFQHPNDKDGISALVASL
ESVS-----IERIVLEATGGMELPAAVALSQA---GMAVAVVNPRQARDFA-KATGQI
AKTDTIDAAILAHFA--EAI RPETRPLASEESQLLGELVTRRHQIVDMITAEKNRLAA
MHGPM--KEHIEQHIE-----
-----WLKTQLNELDEQLQRTIRQTPVWCEQAKLL
KS-----VPGVGDVLSVLLVDLP-ELGKLSR-KIACLVGLAPLNRDSG-KFR
-GKRMIWGGRGRVRTALYMP TLVAIRYNPVLKAFYERLVGQ GK---PKKVALTACMRK
LLIILNAMVKNNQQWNPEMARGAX"
         /note="IS110 e-value= 6.8e-68 complete sequence hit
coverage= 100%, between model( 416 aa) positions 1; 416
length is 312aa with 104 gaps, 1 stops, absolute frame=
Minus2"
CDS      complement(6120718..6119784)
         /colour="255 0 0"
         /evidence=predicted
         /translation="CWVGIDVSKQNLDIHIRPSGH-----IFQHPNDKDGISALVASL
ESVS-----IERIVLEATGGMELPAAVALSQA---GMAVAVVNPRQARDFA-KATGQI
AKTDTIDAAILAHFA--EAI RPETRPLASEESQLLGELVTRRHQIVDMITAEKNRLAA
MHGPM--KEHIEQHIE-----
-----WLKTQLNELDEQLQRTIRQTPVWCEQAKLL
KS-----VPGVGDVLSVLLVDLP-ELGKLSR-KIACLVGLAPLNRDSG-KFR
-GKRMIWGGRGRVRTALYMP TLVAIRYNPVLKAFYERLVGQ GK---PKKVALTACMRK
LLIILNAMVKNNQQWNPEMARGAX"
         /note="IS110 e-value= 2.2e-68 complete sequence hit
coverage= 100%, between model( 416 aa) positions 1; 416
length is 312aa with 104 gaps, 1 stops, absolute frame=
Minus2"
CDS      complement(6013789..6013572)
         /colour="255 0 0"
         /evidence=predicted
         /translation="RIRFVYIPKHTSWLNQIECWFSILVRRLIRRGNF TSKDDLQORI
LEFIEYFNHtMAKPFQWQFKGFQPRLXLM"
         /note="IS630 e-value= 4e-10 fragment hit coverage=

```

19.15%, between model( 376 aa) positions 305; 376 length is 73aa with 0 gaps, 1 stops, absolute frame= Minus2"

CDS complement(6013741..6013632)  
/colour="255 0 0"  
/evidence=predicted  
/translation="IECWFSILVRRRLIR--RGNFTSKDDLQQRILEFIEYFNH"  
/note="IS3\_IS150\_ORF2 e-value= 2e-08 fragment hit coverage= 10.03%, between model( 389 aa) positions 329; 367 length is 37aa with 2 gaps, 0 stops, absolute frame= Minus2"

CDS complement(5927854..5927166)  
/colour="255 0 0"  
/evidence=predicted  
/translation="TDLFKWRHYQFEIILLNVRWYCRYTLSYRNLEEMMG-RGFKVDH ITIHRWVFKYSSELDKR-CRHLKP-THASSRVDETYVKIHXQWRYLRAVDSE-SYTL DFLLTAKRDTKAAKRFLTKALNTXDSWVXISSIQCGRHPAYPPAVEQLQADERIPEKE KVRQVKYLNRRVEQDRIGIKKLVNPGMGFGSCNSARRTLKGFESNMICKVQIKNVGK DDVIG-QIYFINQIFGL"  
/note="IS6 e-value= 1.5e-77 complete sequence hit coverage= 100%, between model( 235 aa) positions 1; 235 length is 230aa with 5 gaps, 3 stops, absolute frame= Minus2"

CDS complement(5927854..5927166)  
/colour="255 0 0"  
/evidence=predicted  
/translation="TDLFKWRHYQFEIILLNVRWYCRYTLSYRNLEEMMG-RGFKVDH ITIHRWVFKYSSELDKR-CRHLKP-THASSRVDETYVKIHXQWRYLRAVDSE-SYTL DFLLTAKRDTKAAKRFLTKALNTXDSWVXISSIQCGRHPAYPPAVEQLQADERIPEKE KVRQVKYLNRRVEQDRIGIKKLVNPGMGFGSCNSARRTLKGFESNMICKVQIKNVGK DDVIG-QIYFINQIFGL"  
/note="IS6 e-value= 6.2e-80 complete sequence hit coverage= 100%, between model( 235 aa) positions 1; 235 length is 230aa with 5 gaps, 3 stops, absolute frame= Minus2"

CDS complement(5746405..5745369)  
/colour="255 0 0"  
/evidence=predicted  
/translation="CMIKIDFTAEEIQHLNYERYHHPHPRVQRRMEVLYLKSQGLPHA QICQLCQISRPTLAKTLRLYQGG---IEGLKTLEYKGOSSSLNAHS-DSVRAYFEQH PP-----RTSAEAQAVIEQLTGIKRSPTQIKAFKLRIGCRSRKVGYPGKSSLP -EKIEEQEQFRQTRLEPLleeAQRQERLVFVDAAHFVHRAYLGF-LWCLRRI----- FIPSPS-GRQRFNVLGALNAVTKEvTSITNHTYINSHSMCLLLAKLALL DPVI--PISVILDNARYQKCQLVTDFAEIVD--IELVYLPSYSPHLNLIERLWRFVRK ECLYSKYYSDFHFSFKGAIQQCIDQCNTTEHKAKLTSLLSLKFQSFQK"  
/note="IS630 e-value= 4e-22 complete sequence hit coverage= 100%, between model( 376 aa) positions 1; 376 length is 346aa with 34 gaps, 0 stops, absolute frame= Minus2"

CDS complement(5746345..5746188)  
/colour="255 0 0"  
/evidence=predicted  
/translation="HHPHPRVQRRMEVLYLKSQGLPHAQICQLCQISRPTLAKTLRLY QGGIEGLK"  
/note="IS481 e-value= 1.1e-08 fragment hit coverage= 15.10%, between model( 351 aa) positions 1; 53 length is 53aa with 0 gaps, 0 stops, absolute frame= Minus2"

CDS complement(5746339..5745369)  
/colour="255 0 0"  
/evidence=predicted  
/translation="PHPRVQRRMEVLYLKSQGLPHAQICQLCQISRPTLAKTLRLYQO

GG---IEGLKTLEYKQSSSLNAHS-DSVRAYFEQHPP-----RTSAEAQAVIE  
QLTGIKRSPTQIKAFKLRIGCRSRKVGYPGKSSLP-EKIEEQEQFRQTRLEPLleeA  
QRQERLVFFVDAAHFVHRAYLGF-LWCLRRI-----FIPSPS-GRQRFN  
VLGALNAVTKEvTSITNHTYINSHSMCLLLAKLALLDPVI--PISVILDNARYQKQCL  
VTDFAEIVD--IELVYLPSYSPHLNLIERLWRFVVRKECLYSKYYSDFHSFKGAIQOCI  
DQCNTTEHKAKLTSLLSLKFQSFQK"  
/note="IS630 e-value= 9.5e-24 fragment hit coverage=  
94.15%, between model( 376 aa) positions 23; 376 length  
is 324aa with 34 gaps, 0 stops, absolute frame= Minus2"  
CDS complement(5716993..5716776)  
/colour="255 0 0"  
/evidence=predicted  
/translation="RIRFVYIPKHTSWLNQIECWFSILVRRLLIRRGNFTSKDDLQORI  
LEFIEYFNHtMAKPFQWQFKGFQPRXLXLM"  
/note="IS630 e-value= 4e-10 fragment hit coverage=  
19.15%, between model( 376 aa) positions 305; 376 length  
is 73aa with 0 gaps, 1 stops, absolute frame= Minus2"  
CDS complement(5716945..5716836)  
/colour="255 0 0"  
/evidence=predicted  
/translation="IECWFSILVRRLLIR--RGNFTSKDDLQORILEFIEYFNH"  
/note="IS3\_IS150\_ORF2 e-value= 2e-08 fragment hit  
coverage= 10.03%, between model( 389 aa) positions 329;  
367 length is 37aa with 2 gaps, 0 stops, absolute frame=  
Minus2"  
CDS complement(5652220..5652039)  
/colour="255 0 0"  
/evidence=predicted  
/translation="AVAESFFGTLKTELIYSTTFANRA--MAKTAIAEWIEVFYNRQR  
LHSTIGHCAPVQFEENYWR"  
/note="IS3\_IS150\_ORF1 e-value= 1.1e-07 fragment hit  
coverage= 20.59%, between model( 306 aa) positions 244;  
306 length is 61aa with 2 gaps, 0 stops, absolute frame=  
Minus2"  
CDS complement(5652220..5652060)  
/colour="255 0 0"  
/evidence=predicted  
/translation="AVAESFFGTLKTELIY--STTFANRAMAKTAIAEWIEVFYNRQR  
LHSTIGHCAPVQ"  
/note="IS3\_IS150\_ORF2 e-value= 3.7e-12 fragment hit  
coverage= 14.14%, between model( 389 aa) positions 327;  
381 length is 54aa with 2 gaps, 0 stops, absolute frame=  
Minus2"  
CDS complement(5652220..5652042)  
/colour="255 0 0"  
/evidence=predicted  
/translation="AVAESFFGTLK--TELIYSTTFANRAMAKTAIAEWIEVFYNRQR  
LHSTIGHCAPVQFEENYW"  
/note="IS3\_IS3\_ORF1 e-value= 3.3e-23 fragment hit  
coverage= 21.68%, between model( 286 aa) positions 225;  
286 length is 60aa with 2 gaps, 0 stops, absolute frame=  
Minus2"  
CDS complement(5652220..5652030)  
/colour="255 0 0"  
/evidence=predicted  
/translation="AVAESFFGTLKTELIYSTTFANRAMAKTAIAEWIEVFYNRQRLH  
STIGHCAPVQFEENYWRTRH"  
/note="IS3\_IS3\_ORF2 e-value= 1.9e-21 fragment hit  
coverage= 22.22%, between model( 288 aa) positions 225;  
288 length is 64aa with 0 gaps, 0 stops, absolute frame=

Minus2"

CDS complement(5652220..5652012)  
/colour="255 0 0"  
/evidence=predicted  
/translation="AVAESFFGTLKTELIYS----TTFANRAMAKTAIAEWIEVFYNR  
QRLHSTIGHCAPVQFEENYWRTRHQTLVAX"  
/note="IS3\_IS51\_ORF1 e-value= 1.5e-22 fragment hit  
coverage= 24.10%, between model( 307 aa) positions 234;  
307 length is 70aa with 4 gaps, 1 stops, absolute frame=  
Minus2"

CDS complement(5652220..5652030)  
/colour="255 0 0"  
/evidence=predicted  
/translation="AVAESFFGTLKTELIYSTTFANRAMAKTAIAEWIEVFYNRQRLH  
STIGHCAPVQFEENYW-RTRH"  
/note="IS3\_IS51\_ORF2 e-value= 2.3e-14 fragment hit  
coverage= 20.50%, between model( 317 aa) positions 245;  
309 length is 64aa with 1 gaps, 0 stops, absolute frame=  
Minus2"

CDS complement(5522092..5521956)  
/colour="255 0 0"  
/evidence=predicted  
/translation="WQTDGWEGYSRQLADE---VIHHVSKALTQRLERTNGILRQQTG  
RWHRR"  
/note="IS1\_ORF2 e-value= 1.6e-12 fragment hit coverage=  
20.68%, between model( 237 aa) positions 164; 212 length  
is 46aa with 3 gaps, 0 stops, absolute frame= Minus2"

CDS complement(5510998..5509761)  
/colour="255 0 0"  
/evidence=predicted  
/translation="IRIPLNLPDI--RVLELSKTERGDWL-----IKIESTLQGTTC  
HQCGREITDL-HCHDQ-PFRIRHLPLFEVPVYLEIRPKRYRCKYCDDhpTTTQHLEWH  
EPRSPNTKAYERWLLRILIN-STVSDVARKLGVSEDIVSGIIDRWIAAQVDWSEYADL  
KVMGMDEISLKRK--HR---DFVVLITIPtTdgVDILAVLADRKQQTVANFLQSIP-I  
DLRQTIERVCTDMYQGFVSAVREQLPQAKIVIDRFHVTKAYRNCADTVRKREVKRLRR  
ELS-----KQEYD-----SIKGAMWPFKRKPENLKES-EQQLLER  
LFA--YSPQLKQAYNLREKLTQIFEGRYTKHGAKcAIRAWCKQVLKSDiKEFDCFLTT  
INNWMDEMTNYFLEG-WTSGFVEGFNNRVKVLKRRCYGIFDIERLRFQRIISLDLNGYQT  
LVVHQRS"  
/note="ISL3 e-value= 4.5e-44 complete sequence hit  
coverage= 100%, between model( 451 aa) positions 1; 451  
length is 413aa with 44 gaps, 0 stops, absolute frame=  
Minus2"

CDS complement(5510839..5509761)  
/colour="255 0 0"  
/evidence=predicted  
/translation="RIRHLPLFEVPVYLEIRPKRYRCKYCDDhpTTTQHLEWHEPRSP  
NTKAYERWLLRILIN-STVSDVARKLGVSEDIVSGIIDRWIAAQVDWSEYADLKVMGM  
DEISLKRK--HR---DFVVLITIPtTdgVDILAVLADRKQQTVANFLQSIP-IDLRQT  
IERVCTDMYQGFVSAVREQLPQAKIVIDRFHVTKAYRNCADTVRKREVKRLRRELS--  
-----KQEYD-----SIKGAMWPFKRKPENLKES-EQQLLERLFA--  
YSPQLKQAYNLREKLTQIFEGRYTKHGAKcAIRAWCKQVLKSDiKEFDCFLTTINNWM  
DEMTNYFLEG-WTSGFVEGFNNRVKVLKRRCYGIFDIERLRFQRIISLDLNGYQTLVVHQ  
RS"  
/note="ISL3 e-value= 2.6e-50 fragment hit coverage=  
86.03%, between model( 451 aa) positions 64; 451 length  
is 360aa with 34 gaps, 0 stops, absolute frame= Minus2"

CDS complement(5509729..5509467)  
/colour="255 0 0"  
/evidence=predicted

/translation="LFYFLMQCPLCGHPK-THKHGKTSKGSQRYRCPHCQQTFS-Etf  
 DTLCYRRQISPETIQTILQAHVEGSSLRGLSRITGVAYNTCVSVVR"  
 /note="IS1\_ORF1 e-value= 1.7e-15 fragment hit coverage=  
 36.40%, between model( 239 aa) positions 1; 87 length is  
 88aa with 2 gaps, 0 stops, absolute frame= Minus2"  
 CDS complement(5475031..5474574)  
 /colour="255 0 0"  
 /evidence=predicted  
 /translation="MTYRKLSHSVWECKYHVVFPKYRKRRIYGRIRQNLGDIFH-EL  
 ARHKESAIIEGHLMLDHVHMLLSIPPKYSVSNVVG YVKGKSAIYIARELGNSRNA-TG  
 HKFWSRGYFVSTVG-RDEEVIRRYIRHQEQEEQKLEQLNLFraXPKSPLRGSNS"  
 /note="IS200 e-value= 9.6e-56 complete sequence hit  
 coverage= 100%, between model( 154 aa) positions 1; 154  
 length is 153aa with 3 gaps, 1 stops, absolute frame=  
 Minus2"  
 CDS complement(5475031..5474574)  
 /colour="255 0 0"  
 /evidence=predicted  
 /translation="MTYRKLSHSVWECKYHVVFPKYRKRRIYGRIRQNLGDIFH-EL  
 ARHKESAIIEGHLMLDHVHMLLSIPPKYSVSNVVG YVKGKSAIYIARELGNSRNA-TG  
 HKFWSRGYFVSTVG-RDEEVIRRYIRHQEQEEQKLEQLNLFraXPKSPLRGSNS"  
 /note="IS200 e-value= 5.7e-55 complete sequence hit  
 coverage= 100%, between model( 154 aa) positions 1; 154  
 length is 153aa with 3 gaps, 1 stops, absolute frame=  
 Minus2"  
 CDS complement(5475031..5474577)  
 /colour="255 0 0"  
 /evidence=predicted  
 /translation="MTYRKLSHSVWECKYHVVFPKYRKRRIYGR-IRQNLGDIFHEL  
 ARHKESAIIEGHLMLDHVHMLLSIPPKYSVSNVVG YVKGKSAIYIARELGNSRNA-TG  
 HKFWSRGYFVSTVG-RDEEVIRRYIRHQEQEEQKLEQLNLFraXPKSPLRGSN"  
 /note="IS200\_IS605 e-value= 8.6e-58 complete sequence hit  
 coverage= 100%, between model( 153 aa) positions 1; 153  
 length is 152aa with 3 gaps, 1 stops, absolute frame=  
 Minus2"  
 CDS complement(5475031..5474577)  
 /colour="255 0 0"  
 /evidence=predicted  
 /translation="MTYRKLSHSVWECKYHVVFPKYRKRRIYGR-IRQNLGDIFHEL  
 ARHKESAIIEGHLMLDHVHMLLSIPPKYSVSNVVG YVKGKSAIYIARELGNSRNA-TG  
 HKFWSRGYFVSTVG-RDEEVIRRYIRHQEQEEQKLEQLNLFraXPKSPLRGSN"  
 /note="IS200\_IS605 e-value= 2.2e-58 complete sequence hit  
 coverage= 100%, between model( 153 aa) positions 1; 153  
 length is 152aa with 3 gaps, 1 stops, absolute frame=  
 Minus2"  
 CDS complement(5475031..5474577)  
 /colour="255 0 0"  
 /evidence=predicted  
 /translation="-MTYRKLSHSVWECKYHVVFPKYRKRRIYGRIRQNLGDIFHEL  
 ARHKESAIIEGHLMLDHVHMLLSIPPKYSVSNVVG YVKGKSAIYIARELGNSRN-ATG  
 HKFWSRGYFVSTVGRDEEVIRRYIRHQEQEEQKLEQLNLFraXPKSPLRGSN"  
 /note="IS605 e-value= 1e-51 complete sequence hit  
 coverage= 100%, between model( 152 aa) positions 1; 152  
 length is 152aa with 2 gaps, 1 stops, absolute frame=  
 Minus2"  
 CDS complement(5475031..5474577)  
 /colour="255 0 0"  
 /evidence=predicted  
 /translation="-MTYRKLSHSVWECKYHVVFPKYRKRRIYGRIRQNLGDIFHEL  
 ARHKESAIIEGHLMLDHVHMLLSIPPKYSVSNVVG YVKGKSAIYIARELGNSRN-ATG

HKFWSRGYFVSTVGRDEEVIRRYIRHQEQEEQKLEQLNLfrAXPKSPLRGSN"  
 /note="IS605 e-value= 5.5e-52 complete sequence hit  
 coverage= 100%, between model( 152 aa) positions 1; 152  
 length is 152aa with 2 gaps, 1 stops, absolute frame=  
 Minus2"

CDS complement(5354932..5354196)  
 /colour="255 0 0"  
 /evidence=predicted  
 /translation="-----TGVYKRTFkpMLHAWHTYHLSRSN--AGRPPKLCRCQDL  
 LVALQYWREYR TYFH IAGDWEVSESTVCRIVHQVETALMNSGLFRLPGQKSL LQGFER  
 PDVVVMDVTETPIERPQTRQKAYYS GKRDIPS NARLSLTATLXRLSALT-----  
 --LVQVVGMI FrsprfqvSISIQIPRVCKIADIKGLQ-----PIMP-TAMFLSRSHNT  
 VNXLP CSESITVLXVRNEWALNTLIAAXRFSEFCRSAIAIVVVATRCGVTX"  
 /note="IS5\_ISL2 e-value= 9.6e-21 complete sequence hit  
 coverage= 100%, between model( 260 aa) positions 1; 260  
 length is 246aa with 23 gaps, 5 stops, absolute frame=  
 Minus2"

CDS complement(5354872..5354562)  
 /colour="255 0 0"  
 /evidence=predicted  
 /translation="SRSNAGRPPKLCRCQDLLVALQYWREYR TYFH IAGDWEVSESTV  
 CRIVHQVETALMNSGLFRLPGQKSL LQGFERPDVVVMDVTETPIERPQTRQKAYYS GK  
 KR"  
 /note="IS5\_ISL2 e-value= 9.3e-44 fragment hit coverage=  
 40%, between model( 260 aa) positions 26; 129 length is  
 104aa with 0 gaps, 0 stops, absolute frame= Minus2"

CDS complement(5338738..5338023)  
 /colour="255 0 0"  
 /evidence=predicted  
 /translation="YLSPES-LQCRASSKVVMXSTV GSPS-----ILARISDL  
 FPHCWRLGSLXINCLPYCpGRDRSDELRTLSL TRSEISATR-----VRATGCR  
 CDGCDXNAHXTSPDKTKSVLF----RKKKRHTFKCQIIANRNTLEIICLN VGPGRRH  
 FQIFKSGIHIHPDTE SLQDSGYQGI AAYHANSYVPLKKPQH GELTSLQREYNRALSQ  
 ERMGIEHINRSLKIFRILSERYRNR RRRYALRCNLIAAIYNYEL"  
 /note="IS5\_ISL2 e-value= 6.9e-39 complete sequence hit  
 coverage= 100%, between model( 260 aa) positions 1; 260  
 length is 239aa with 23 gaps, 4 stops, absolute frame=  
 Minus2"

CDS complement(5338423..5338023)  
 /colour="255 0 0"  
 /evidence=predicted  
 /translation="KKKRHTFKCQIIANRNTLEIICLN VGPGRRHDFQIFKSGIHIH  
 PDTE SLQDSGYQGI AAYHANSYVPLKKPQH GELTSLQREYNRALSQERMGIEHINRSL  
 KIFRILSERYRNR RRRYALRCNLIAAIYNYEL"  
 /note="IS5\_ISL2 e-value= 6.5e-62 fragment hit coverage=  
 51.54%, between model( 260 aa) positions 127; 260 length  
 is 134aa with 0 gaps, 0 stops, absolute frame= Minus2"

CDS complement(4930255..4929975)  
 /colour="255 0 0"  
 /evidence=predicted  
 /translation="SMCEPYCQSEK-ILKRGFDSLqdgTLVQRYQCKDCNRRFN-ERT  
 GTPMARLRtasSVVSYAIKARTEGMGVR SAGRTFGKSHTTIMRWEKRLADQA"  
 /note="IS1\_ORF1 e-value= 3.2e-11 fragment hit coverage=  
 37.24%, between model( 239 aa) positions 5; 93 length is  
 94aa with 2 gaps, 0 stops, absolute frame= Minus2"

CDS complement(4612015..4611591)  
 /colour="255 0 0"  
 /evidence=predicted  
 /translation="GRQRFNVLGALNAVTKEvTSITNHTYINSHSMCLLLAKLALLDP  
 VI--PISVILDNARYQKCQLVTDFAEIVD--IELVYLPSYSPHLNLIERLWRFV RKEC

LYSKYYSDFHSFKGAIQQCIDQCNTTEHKAKLTSLLSLKFSQK"  
 /note="IS630 e-value= 6.2e-18 fragment hit coverage=  
 38.56%, between model( 376 aa) positions 232; 376 length  
 is 142aa with 4 gaps, 0 stops, absolute frame= Minus2"  
 CDS complement(4461124..4460748)  
 /colour="255 0 0"  
 /evidence=predicted  
 /translation="EHRKSEDFALCMQYLVDGLFPQADKLHVLDNLNTHspaalyKT  
 FNPDEALRILK-RIQFHYPKHGSWLNMIEFEFSALSROCLNRRIP-DIEQLRYEVTA  
 WEKRRNHDKATVNWLFVDDARTKLS"  
 /note="IS630 e-value= 2.3e-07 fragment hit coverage=  
 32.45%, between model( 376 aa) positions 255; 376 length  
 is 126aa with 2 gaps, 0 stops, absolute frame= Minus2"  
 CDS complement(4320520..4320258)  
 /colour="255 0 0"  
 /evidence=predicted  
 /translation="LFYFLMQCPLCGHPK-THKHGKTSKGSQRYRCPHCQQTFS-Etf  
 DTLCYRRQiSPETIQITILQAHVEGSSLRGLSRITGVAYNTCVSVVR"  
 /note="IS1\_ORF1 e-value= 1.7e-15 fragment hit coverage=  
 36.40%, between model( 239 aa) positions 1; 87 length is  
 88aa with 2 gaps, 0 stops, absolute frame= Minus2"  
 CDS complement(4297825..4296789)  
 /colour="255 0 0"  
 /evidence=predicted  
 /translation="PMIKIDFTAEEIQQLNYERYHHPHPRVQRRMEVLYLKSQGLSHT  
 QICQLCQISRPTLAKTLRQYQGG---IEGLKTLEYKQGPSLLNAHS-DSVRAYFEQH  
 PP-----RTSAEAQAVIEQLTGIKRSPTQIKAFKLRIGCRYRKVGYPGKSSLP  
 -EKIEEQEFRHTRLEPLleeAQRQERLVFVDAAHFVHRAYLGF-VWCITRI-----  
 -----FIPSPS-GRQRFNVLGALDAITKDLVSVTNHTYINSHSMCLLLAKLALL  
 DPV-IPISVILDNARYQKCQLVTDFAEIVD--IELVYLPSYSPHLNLIERLWRFVVRKE  
 CLYSKYADFPAPFKGAIQQCIDQCNGECHKAKLTLLSLKFSQK"  
 /note="IS630 e-value= 6.7e-25 complete sequence hit  
 coverage= 100%, between model( 376 aa) positions 1; 376  
 length is 346aa with 33 gaps, 0 stops, absolute frame=  
 Minus2"  
 CDS complement(4297825..4296789)  
 /colour="255 0 0"  
 /evidence=predicted  
 /translation="PMIKIDFTAEEIQQLNYERYHHPHPRVQRRMEVLYLKSQGLSHT  
 QICQLCQISRPTLAKTLRQYQGG---IEGLKTLEYKQGPSLLNAHS-DSVRAYFEQH  
 PP-----RTSAEAQAVIEQLTGIKRSPTQIKAFKLRIGCRYRKVGYPGKSSLP  
 -EKIEEQEFRHTRLEPLleeAQRQERLVFVDAAHFVHRAYLGF-VWCITRI-----  
 -----FIPSPS-GRQRFNVLGALDAITKDLVSVTNHTYINSHSMCLLLAKLALL  
 DPV-IPISVILDNARYQKCQLVTDFAEIVD--IELVYLPSYSPHLNLIERLWRFVVRKE  
 CLYSKYADFPAPFKGAIQQCIDQCNGECHKAKLTLLSLKFSQK"  
 /note="IS630 e-value= 4.9e-24 complete sequence hit  
 coverage= 100%, between model( 376 aa) positions 1; 376  
 length is 346aa with 33 gaps, 0 stops, absolute frame=  
 Minus2"  
 CDS complement(4297765..4297608)  
 /colour="255 0 0"  
 /evidence=predicted  
 /translation="HHPHPRVQRRMEVLYLKSQGLSHTQICQLCQISRPTLAKTLRQY  
 QGGIEGLK"  
 /note="IS481 e-value= 3.7e-09 fragment hit coverage=  
 15.10%, between model( 351 aa) positions 1; 53 length is  
 53aa with 0 gaps, 0 stops, absolute frame= Minus2"  
 CDS complement(4135960..4135503)  
 /colour="255 0 0"  
 /evidence=predicted

```

/translation="MTYRKLSHVSWECKYHVVFPKYRKRRIYGRIRQNLGDIFH-EL
ARHKESAIEEGHMLLDHVMHLLSIPPKYSVSNVVG YVKGKSAIYIARELGNSRNA-TG
HKFWSRGYFVSTVG-RDEEVIRRYIRHQEQEEQKLEQLNLFraXPKSPLRGSNS"
/note="IS200 e-value= 9.6e-56 complete sequence hit
coverage= 100%, between model( 154 aa) positions 1; 154
length is 153aa with 3 gaps, 1 stops, absolute frame=
Minus2"
CDS complement(4135960..4135503)
/colour="255 0 0"
/evidence=predicted
/translation="MTYRKLSHVSWECKYHVVFPKYRKRRIYGRIRQNLGDIFH-EL
ARHKESAIEEGHMLLDHVMHLLSIPPKYSVSNVVG YVKGKSAIYIARELGNSRNA-TG
HKFWSRGYFVSTVG-RDEEVIRRYIRHQEQEEQKLEQLNLFraXPKSPLRGSNS"
/note="IS200 e-value= 5.7e-55 complete sequence hit
coverage= 100%, between model( 154 aa) positions 1; 154
length is 153aa with 3 gaps, 1 stops, absolute frame=
Minus2"
CDS complement(4135960..4135506)
/colour="255 0 0"
/evidence=predicted
/translation="MTYRKLSHVSWECKYHVVFPKYRKRRIYGR-IRQNLGDIFHEL
ARHKESAIEEGHMLLDHVMHLLSIPPKYSVSNVVG YVKGKSAIYIARELGNSRNA-TG
HKFWSRGYFVSTVG-RDEEVIRRYIRHQEQEEQKLEQLNLFraXPKSPLRGSN"
/note="IS200_IS605 e-value= 8.6e-58 complete sequence hit
coverage= 100%, between model( 153 aa) positions 1; 153
length is 152aa with 3 gaps, 1 stops, absolute frame=
Minus2"
CDS complement(4135960..4135506)
/colour="255 0 0"
/evidence=predicted
/translation="MTYRKLSHVSWECKYHVVFPKYRKRRIYGR-IRQNLGDIFHEL
ARHKESAIEEGHMLLDHVMHLLSIPPKYSVSNVVG YVKGKSAIYIARELGNSRNA-TG
HKFWSRGYFVSTVG-RDEEVIRRYIRHQEQEEQKLEQLNLFraXPKSPLRGSN"
/note="IS200_IS605 e-value= 2.2e-58 complete sequence hit
coverage= 100%, between model( 153 aa) positions 1; 153
length is 152aa with 3 gaps, 1 stops, absolute frame=
Minus2"
CDS complement(4135960..4135506)
/colour="255 0 0"
/evidence=predicted
/translation="-MTYRKLSHVSWECKYHVVFPKYRKRRIYGRIRQNLGDIFHEL
ARHKESAIEEGHMLLDHVMHLLSIPPKYSVSNVVG YVKGKSAIYIARELGNSRN-ATG
HKFWSRGYFVSTVGRDEEVIRRYIRHQEQEEQKLEQLNLfrAXPKSPLRGSN"
/note="IS605 e-value= 1e-51 complete sequence hit
coverage= 100%, between model( 152 aa) positions 1; 152
length is 152aa with 2 gaps, 1 stops, absolute frame=
Minus2"
CDS complement(4135960..4135506)
/colour="255 0 0"
/evidence=predicted
/translation="-MTYRKLSHVSWECKYHVVFPKYRKRRIYGRIRQNLGDIFHEL
ARHKESAIEEGHMLLDHVMHLLSIPPKYSVSNVVG YVKGKSAIYIARELGNSRN-ATG
HKFWSRGYFVSTVGRDEEVIRRYIRHQEQEEQKLEQLNLfrAXPKSPLRGSN"
/note="IS605 e-value= 5.5e-52 complete sequence hit
coverage= 100%, between model( 152 aa) positions 1; 152
length is 152aa with 2 gaps, 1 stops, absolute frame=
Minus2"
CDS complement(3914230..3913173)
/colour="255 0 0"
/evidence=predicted

```



```

/translation="ACSRCRHTFT-DXSSQSEDIEGSQKPHGCMGSESSCTT-----
---WRISGASSQH---TDGDSSALE---RMGXVKSPSRGLAVSDPgDLAGKVRVRQ-L
QQDYSIRQICQVLNYPQRSQVYYHARGQP-----DESELKAAIAGVAGAYP-TYGYRRI
TAQLQ---RQGYCVNHKRVARLMRQIGIMAKTKVK-RKRTTNSEHSfprYGNRVLNLS
--IDHPEQVWVADITYIRLQ-QEFVYLAVVMDVFTRAIRGWHLRSRHIDQQLTLRALNK
ALERAT---PEIHHS-----DQGVQYAAAAYMQLLQHQVQISMAEVGQAWQNGYAER
LMRTIKEEEVD--LSDYRNFTEAYEHIEQFLEDvYMHKRIHSSLGYLTPCEYEQQWRQ
Q"
/note="IS3_IS150_ORF2    e-value= 5e-28 complete sequence
hit coverage= 100%, between model( 389 aa) positions 1;
389 length is 353aa with 40 gaps, 2 stops, absolute
frame= Minus2"
CDS    complement(3914146..3913149)
/colour="255 0 0"
/evidence=predicted
/translation="MGSESSCTTWRISGASSQHTDGDS--SALERMGXVK-----SPS
RGLAVSDPGDLAGKVRVRQLQO-----DYSIRQICQVLNYPQRSQVYYHARGQ
PDESELKAAIAGVAGAYPTYGYRRITAQLQRQGYCVNHKRVARLMRQIGIMAKTKV-K
RKRTtnsehsfprYGNRVLNLSIDHPEQVWVADITYIRLQ--QEFVYLAVVmDVFTRA
IRGWHLRSRHIDQQLTLRALNKALE-RATPEIHSDQGVQYAAAAYMQLLQHQVQISM
AEVGQAWQNGYAERLMRTIKEEEVDLSDYRNFTEAYEHIEQFLEDvYMHKRIHSSLGY
LTPCEYEQQWRQONNHYCMNK"
/note="IS3_IS407_ORF2    e-value= 1.2e-11 complete sequence
hit coverage= 100%, between model( 344 aa) positions 1;
344 length is 333aa with 22 gaps, 1 stops, absolute
frame= Minus2"
CDS    complement(3914050..3913176)
/colour="255 0 0"
/evidence=predicted
/translation="VKSPSRGLAVSDPgDLAGKVR----VRQLQQDYSIRQICQVLNYP
QRSQVYYHARGQPDESELKAAIAGV-AGAYPTYGYRRITAQLQRQGYCVNHKRVARLM
RQIGIMAKTKVK----RKRTTNSEHSF-PRYGNRvLNLSIDHPEQVWVADITYIRL--
QQEFVYLAVVMDVFTRAIRGWHLRSRHIDQQLTLRALNKALER----ATPEIHSDQGV
QYAAAAYMQLLQHQVQISMAEVGQAWQNGYAERLMRTIKEEEVDLSDYRNFTEAYE
EHIEQFLEDVYMHKRIHSSLGYLTPCEYEQQWRQ"
/note="IS3_IS150_ORF1    e-value= 2.2e-46 complete sequence
hit coverage= 100%, between model( 306 aa) positions 1;
306 length is 292aa with 18 gaps, 0 stops, absolute
frame= Minus2"
CDS    complement(3914026..3913140)
/colour="255 0 0"
/evidence=predicted
/translation="AVSDPGDLAGKVRVRQLQQDYSIRQICQVLNYPQRSQVYYHARGQ
PD-----ESELKAAIAGVAGAYPTYGYRRITAQLQRQGYC---
VNHKRVARLMRQIGIMAKTKVKRKR-TTNSEHSFPRYGNRVLNLSIDHPEQVWVADIT
YI-----RLQO-----EFVYLAVVMDVFTRAIRGWHLRSRH----IDQ
QLTLRALNKALERAT-PEIHSDQGVQYAAA----AYMQLLQHQVQISMAEVGQAWQ
NGYAERLMRTIKEEEVDLSD---YRNFTEAYEHIEQFLEDvYMHKRIHSSLGYLTPCE
YEQQWRQONNHYCMNKEDS"
/note="IS481 e-value= 2.7e-07 complete sequence hit
coverage= 100%, between model( 351 aa) positions 1; 351
length is 296aa with 57 gaps, 0 stops, absolute frame=
Minus2"
CDS    complement(3914008..3913140)
/colour="255 0 0"
/evidence=predicted
/translation="----DLAGKVRVRQLQQDYSIRQICQVLNYP---RSQVYYHARG
QPDESELKA--AIAGV-----AGA---YPTYGYRRITAQLQRQGYCVNHKRVARLM
RQIGIMAKTKVKRKRRTTNSEHSFPRYGNRVL-NLSIDHPEQVWVADITYIRLQQEFVY
LAVVMDVFTRAIRGWHLRSRHIDQQLTLRALNKALERATPE-----IHSDQGVQY

```

AAAAYMQLLQHQVQVQISMAEVGQAWQNGYAERLMRTIKEEEVDLSDYrnFTEAYEHIE  
QFLEDV--YMHKRIHSSLGYLTPCEYEQQWRQONNHCMNKEDS"

/note="IS3\_IS51\_ORF2 e-value= 3.7e-25 complete sequence  
hit coverage= 100%, between model( 317 aa) positions 1;  
317 length is 290aa with 30 gaps, 0 stops, absolute  
frame= Minus2"

CDS complement(3914005..3913164)

/colour="255 0 0"

/evidence=predicted

/translation="-LAGKV--RVRQL-QQDYSIRQICQVLNYPRSQVYYHARG----  
-----QPDESELKAAIAGVAGAYPTYGYRRITAQLQRQGY-----CVNHKRVARLM  
RQIGIM--AKTKVKRK-RttsehsfprYGNRVLnlsIDHPEQVWVAD-ITYIRLQOE  
FVYLAVVMDVFTRAIRGWH-----LSRHIDQQLTLRALNK---ALERATPEIHH-SD  
QGVQYAAAAYMQLLQHQVQVQISMAEVGQAWQNGYAERLMRTIKEEEVDLSDYRNFT  
EAYEHIEQFLEDVYMHKRIHSSLGYLTPCEYEQQWRQONNH"

/note="IS3\_IS2\_ORF2 e-value= 3.7e-08 complete sequence  
hit coverage= 100%, between model( 302 aa) positions 1;  
302 length is 281aa with 34 gaps, 0 stops, absolute  
frame= Minus2"

CDS complement(3913996..3913149)

/colour="255 0 0"

/evidence=predicted

/translation="KVRVRQLQQDYSIRQICQVLNYPRSQVYYHA-----RG  
QPDESELKAAIAGV-AGAYPTYGYRRITAQLQRQGYCVNHKRVARLMRQIGIMAKTKV  
KRKRRTTSEHSFPRYGNRVL-NLSIDHPEQVWVADITYIRLQOEFVYLAVVMDVFTRA  
IRGWHLRSRHIDQQLT-LRALNKALERATPE-----IHHSQGVQYAAAAYMQLLQ  
HQVQVQISMAEVGQAWQNGYAERLMRTIKEEEVDL---S-DYRNFTTEAYEHIEQFLEDV  
YMHKRIHSSLGYLTPCEYEQQWRQONNHCMNK"

/note="IS3\_IS51\_ORF1 e-value= 3e-51 complete sequence

hit

coverage= 100%, between model( 307 aa) positions 1; 307  
length is 283aa with 25 gaps, 0 stops, absolute frame=  
Minus2"

CDS complement(3913996..3913149)

/colour="255 0 0"

/evidence=predicted

/translation="KVRVRQLQQDYSIRQICQVLNYPRSQVYYHA-----RG  
QPDESELKAAIAGV-AGAYPTYGYRRITAQLQRQGYCVNHKRVARLMRQIGIMAKTKV  
KRKRRTTSEHSFPRYGNRVL-NLSIDHPEQVWVADITYIRLQOEFVYLAVVMDVFTRA  
IRGWHLRSRHIDQQLT-LRALNKALERATPE-----IHHSQGVQYAAAAYMQLLQ  
HQVQVQISMAEVGQAWQNGYAERLMRTIKEEEVDL---S-DYRNFTTEAYEHIEQFLEDV  
YMHKRIHSSLGYLTPCEYEQQWRQONNHCMNK"

/note="IS3\_IS51\_ORF1 e-value= 3.9e-53 complete sequence  
hit coverage= 100%, between model( 307 aa) positions 1;  
307 length is 283aa with 25 gaps, 0 stops, absolute  
frame= Minus2"

CDS complement(3913993..3913179)

/colour="255 0 0"

/evidence=predicted

/translation="VRVRQLQQDYSIRQICQVLNYPRSQVYYHARG--QPD-----ES  
ELKAAI-AGVAGAYPTYGYRRITAQLQ-RQGYCVNHKRVARLMRQIGIMAKTKVKRKR  
TTNSEHSfPRYGNRVLNLS-IDHPEQVWVADITYIRLQOEFVYLAVVMDVFTRAIRGW  
HLSRHIDQQLTLRALNKALERA-TPE--IHHSQGVQYAAAAYMQLLQHQVQVQISMAE  
VGQAWQNGYAERLMRTIK-EEVDL-SDYRNFTTEAYEHIEQFLEDVYMHKRIHSSLGY  
LTPCEYEQQWR"

/note="IS3\_IS3\_ORF1 e-value= 7.6e-54 complete sequence  
hit coverage= 100%, between model( 286 aa) positions 1;  
286 length is 272aa with 15 gaps, 0 stops, absolute  
frame= Minus2"

CDS complement(3913993..3913179)

```

/colour="255 0 0"
/evidence=predicted
/translation="VRVRQLQDYSIRQICQVLNYPRSQVYYHARG--QPD-----ES
ELKAAI-AGVAGAYPTYGYRRITAQLQ-RQGYCVNHKRVARLMRQIGIMAKTKVKKRKR
TTNSEHSfPRYGNRVLNLS-IDHPEQVWVADITYIRLQQEFVYLAVVMDVFTRAIRGW
HLSRHIDQQLTLRALNKALERA-TPE--IHSDQGVQYAAAAAYMQLLQHQVQISM
VGQAWQNGYAERLMRTIK-EEEVDL-SDYRNFTEAYEHIEQFLEDVYMHKRIHSSLGY
LTPCEYEQQWR"
/note="IS3_IS3_ORF1      e-value= 2e-54 complete sequence

hit
coverage= 100%, between model( 286 aa) positions 1; 286
length is 272aa with 15 gaps, 0 stops, absolute frame=
Minus2"
CDS
complement(3913981..3913167)
/colour="255 0 0"
/evidence=predicted
/translation="QLQDYSIRQICQVLNYPRSQVYYHARGQPDE-----SEL
KAAIAGVAGayPTYGYRRITAQLRQGYCVNHKRVARLMRQIGIMAKTKVKKRRTTNS
EHSFPRY---GNRVLNLSIDHPEQVWVADITYIRLQQEFVYLAVVMDVFTRAIRGWHL
SRHIDQQLTLRALNKALER----ATPE---IHSDQGVQYAAAAAYMQLLQHQVQISM
AEVGQAWQNGYAERLMRTIKEEEEVDLSDYRNFTEAYEHIEQFLEDVYMHKRIHSSLGY
LTPCEYEQQWRQNN"
/note="IS3_IS3_ORF2      e-value= 3.3e-65 complete sequence
hit coverage= 100%, between model( 288 aa) positions 1;
288 length is 272aa with 19 gaps, 0 stops, absolute
frame= Minus2"
CDS
complement(3913981..3913167)
/colour="255 0 0"
/evidence=predicted
/translation="QLQDYSIRQICQVLNYPRSQVYYHARGQPDE-----SEL
KAAIAGVAGayPTYGYRRITAQLRQGYCVNHKRVARLMRQIGIMAKTKVKKRRTTNS
EHSFPRY---GNRVLNLSIDHPEQVWVADITYIRLQQEFVYLAVVMDVFTRAIRGWHL
SRHIDQQLTLRALNKALER----ATPE---IHSDQGVQYAAAAAYMQLLQHQVQISM
AEVGQAWQNGYAERLMRTIKEEEEVDLSDYRNFTEAYEHIEQFLEDVYMHKRIHSSLGY
LTPCEYEQQWRQNN"
/note="IS3_IS3_ORF2      e-value= 1.2e-64 complete sequence
hit coverage= 100%, between model( 288 aa) positions 1;
288 length is 272aa with 19 gaps, 0 stops, absolute
frame= Minus2"
CDS
complement(3913978..3913173)
/colour="255 0 0"
/evidence=predicted
/translation="LQDYSIRQICQVLNYPRSQVYYHARGQP-----DESELKAAIA
GVAGAYP-TYGYRRITAQLQ---RQGYCVNHKRVARLMRQIGIMAKTKVK-RKRTTNS
EHSfPRYGNRVLNLS--IDHPEQVWVADITYIRLQ-QEFVYLAVVMDVFTRAIRGWHL
SRHIDQQLTLRALNKALERAT---PEIHHS-----DQGVQYAAAAAYMQLLQHQVQIS
MAEVGQAWQNGYAERLMRTIKEEEEVD--LSDYRNFTEAYEHIEQFLEDVYMHKRIHSS
LGYLTPCEYEQQWRQQ"
/note="IS3_IS150_ORF2    e-value= 2.2e-46 fragment hit
coverage= 74.29%, between model( 389 aa) positions 101;
389 length is 269aa with 23 gaps, 0 stops, absolute
frame= Minus2"
CDS
complement(3913963..3913176)
/colour="255 0 0"
/evidence=predicted
/translation="SIRQICQVLNYPRSQVYYHARGQPDESELKAAIAGV-AGAYPTY
GYRRITAQLRQGYCVNHKRVARLMRQIGIMAKTKVK----RKRTTNSSEHSF-PRYGN
RvLNLSIDHPEQVWVADITYIRL--QQEFVYLAVVMDVFTRAIRGWHLRSHIDQQLTL
RALNKALER----ATPEIHSDQGVQYAAAAAYMQLLQHQVQISM
AEVGQAWQNGYAE
RLMRTIKEEEEVDLSDYRNFT--EAYEHIEQFLEDVYMHKRIHSSLGYLTPCEYEQQWR

```

Q"  
 /note="IS3\_IS150\_ORF1 e-value= 1.4e-49 fragment hit coverage= 89.87%, between model( 306 aa) positions 32; 306 length is 263aa with 14 gaps, 0 stops, absolute frame= Minus2"  
 CDS complement(3913963..3913764)  
 /colour="255 0 0"  
 /evidence=predicted  
 /translation="SIRQICQVLNYPQRSQVYYHARGQPDESELKAAIAGVAGAYPTYG YRRITAQLQRQGYCVNHKRVARL"  
 /note="IS3\_IS407\_ORF2 e-value= 2e-15 fragment hit coverage= 19.48%, between model( 344 aa) positions 80; 146 length is 67aa with 0 gaps, 0 stops, absolute frame= Minus2"  
 CDS complement(3913912..3913755)  
 /colour="255 0 0"  
 /evidence=predicted  
 /translation="YHARGQPDESELKAAIAGVAGAYPTYGYRRITAQLQRQGY---- -CVNHKRVARLMRQ"  
 /note="IS3\_IS2\_ORF2 e-value= 9.1e-09 fragment hit coverage= 18.87%, between model( 302 aa) positions 48; 104 length is 53aa with 5 gaps, 0 stops, absolute frame= Minus2"  
 CDS complement(3913846..3913164)  
 /colour="255 0 0"  
 /evidence=predicted  
 /translation="YPTYGYRRITAQLQRQGYCVNHKRVARLMRQIGIMAKTKVKRKR TTNSEHSFPRYGNRVL-NLSIDHPEQVWVADITYIRLQOEFVYLAVVMDVFTRAIRGW HLSRHIDQQLTLRALNKALERATPE-----IHHSDOGVOYAAAAYMQLLOQHVOVQ ISMAEVGQAWQNGYAERLMRTIKEEVDLSDYrnFTEAYEHIEQFLEDV--YMHKRIH SSLGYLTPCEYEQQWRQONNH"  
 /note="IS3\_IS51\_ORF2 e-value= 1.9e-38 fragment hit coverage= 74.76%, between model( 317 aa) positions 73; 309 length is 228aa with 11 gaps, 0 stops, absolute frame= Minus2"  
 CDS complement(3759763..3758637)  
 /colour="255 0 0"  
 /evidence=predicted  
 /translation="FKHLHLGMI sDIKRKSLPAIARAVGLENHQSLHHFLSESPWVAS hLSDkRLDIILKILDGRRLILLID-----ETGDCKKGKSTDYVKR QYIGNVGKKENGIvAVTAYGLFQGMILPLSFEVYKPR-----ErLKEEDEYLSK PQIAAGMIRQLQGMGFCFELVLADSLYGEAQTNFVNVLEELKLPYILAIRSNHAVWLP AEQAVFAEPWQSFERTFSNGT-----TETRYR QEIIYGQRHHQKRYWLLTTDPQTLPENSTS-----YVMAA APE----IKLDEIGDCYGFRTWIEYGLKQSKD-TLGWADFRMTHYEQIEKWWEIVMSA FLMVSLFADVFND S-----CPVAHQHFAQHPWWDNQNG WKNLLNNVR--LIIQPLIS----WNLLKRWLEVFPSRALKKGF"  
 /note="IS4 e-value= 9.9e-07 complete sequence hit coverage= 100%, between model( 486 aa) positions 1; 486 length is 376aa with 117 gaps, 0 stops, absolute frame= Minus2"  
 CDS complement(3759763..3759069)  
 /colour="255 0 0"  
 /evidence=predicted  
 /translation="FKHLHLGMI sDIKRKSLPAIARAVGLENHQSLHHFLSESPWVAS hLSDkRLDIILKILDGRRLILLID-----ETGDCKKGKSTDYVKR QYIGNVGKKENGIvAVTAYGLFQGMILPLSFEVYKPR-----ErLKEEDEYLSK PQIAAGMIRQLQGMGFCFELVLADSLYGEAQTNFVNVLEELKLPYILAIRSNHAVWLP AEQAVFAEPWQSFERTFSNGTTETRYrQEIIYGqrhhQKRY"  
 /note="IS4 e-value= 4.7e-14 fragment hit coverage=

51.23%, between model( 486 aa) positions 1; 249 length is 232aa with 27 gaps, 0 stops, absolute frame= Minus2"  
 complement(3688744..3687618)  
 /colour="255 0 0"  
 /evidence=predicted  
 /translation="FKHLHLGMISDIKRKSLPAIARAVGLENHQSLHHLFSESPPWVAS  
 hLSDkRLDIILKILDGRRLLILLID-----ETGDCKKKGKSTDYVVKR  
 QYIGNVGGKENGIVAVTAYGLFQGMILPLSFEVYKPR-----ErLKEEDEYLSK  
 PQIAAGMIRQLQGMGFCELVLADSLYGEAQTNFVNVLEELKLPYILAIRSNHAVWLP  
 AEQAVFAEPWQSFERTFSNGT-----TETRYR  
 QEIIYGQRHHQKRYWLLTTPQTLPENSTS-----YVMAA  
 APE----IKLDEIGDCYGFRTWIEYGLKQSKD-TLGWADFRMTHYEQIEKWWEIVMSA  
 FLMVSLFADVFNDS-----CPVAHQHFAQHPwWDNONG  
 WKNLLNNVR--LIIQPLIS---WNLLKRWLEVFPSRALKKGf"  
 /note="IS4 e-value= 9.9e-07 complete sequence hit  
 coverage= 100%, between model( 486 aa) positions 1; 486  
 length is 376aa with 117 gaps, 0 stops, absolute frame=  
 Minus2"

CDS  
 complement(3688744..3688050)  
 /colour="255 0 0"  
 /evidence=predicted  
 /translation="FKHLHLGMISDIKRKSLPAIARAVGLENHQSLHHLFSESPPWVAS  
 hLSDkRLDIILKILDGRRLLILLID-----ETGDCKKKGKSTDYVVKR  
 QYIGNVGGKENGIVAVTAYGLFQGMILPLSFEVYKPR-----ErLKEEDEYLSK  
 PQIAAGMIRQLQGMGFCELVLADSLYGEAQTNFVNVLEELKLPYILAIRSNHAVWLP  
 AEQAVFAEPWQSFERTFSNGTTETRYrQEIIYGqrhhQKRY"  
 /note="IS4 e-value= 4.7e-14 fragment hit coverage=  
 51.23%, between model( 486 aa) positions 1; 249 length is  
 232aa with 27 gaps, 0 stops, absolute frame= Minus2"

CDS  
 complement(3511168..3510495)  
 /colour="255 0 0"  
 /evidence=predicted  
 /translation="SXGICMKCPECQGQh-IHKNghRR-GKQNHICVTCGRQFL--ST  
 YSKRGYSDWTKRLCLRMVNGMGLKGIERVIGVAHTTVIHWVQVGVllPNAYDPDDI  
 PQ-----VGELDELETFVGGKRNKVWIW-TVVDHFHFG--ILGWVVDHSA  
 ETRPLWqaIVCWQCFWVSDGNPVYpgFIPEgDQIVSKTYMTRVEGENTRLRHYLAR  
 LHRKTLcYSKsVDMLKHSIRLL---IHyl"  
 /note="IS1\_ORF1 e-value= 3.5e-42 complete sequence hit  
 coverage= 100%, between model( 239 aa) positions 1; 239  
 length is 225aa with 22 gaps, 1 stops, absolute frame=  
 Minus2"

CDS  
 complement(3511168..3510495)  
 /colour="255 0 0"  
 /evidence=predicted  
 /translation="SXGICMKCPECQGQh-IHKNghRR-GKQNHICVTCGRQFL--ST  
 YSKRGYSDWTKRLCLRMVNGMGLKGIERVIGVAHTTVIHWVQVGVllPNAYDPDDI  
 PQ-----VGELDELETFVGGKRNKVWIW-TVVDHFHFG--ILGWVVDHSA  
 ETRPLWqaIVCWQCFWVSDGNPVYpgFIPEgDQIVSKTYMTRVEGENTRLRHYLAR  
 LHRKTLcYSKsVDMLKHSIRLL---IHyl"  
 /note="IS1\_ORF1 e-value= 1.9e-41 complete sequence hit  
 coverage= 100%, between model( 239 aa) positions 1; 239  
 length is 225aa with 22 gaps, 1 stops, absolute frame=  
 Minus2"

CDS  
 complement(3511168..3510489)  
 /colour="255 0 0"  
 /evidence=predicted  
 /translation="SXGICMKCPECQGQh-IHKNghRR-GKQNHICVTCGR----QFL  
 STYSKRGysdwTKRLCLRMVNGMGLKGIERVIGVAHTTVIHWVQV--GVLLPNAYD  
 PDDIPQVGELDELETFVGGKRNKVWIWTVVDHFHFGILGWVVDHSAETFRPLWQaIV  
 CWQ-CFFWVSDGNPVYpgFIPEg----DQIVSKTYMTRVEGENTRLRHYLARLHRKTL

CYSKSV DMLKHSIRLLI-HYLKF"  
 /note="IS1\_ORF2 e-value= 3.2e-29 complete sequence hit  
 coverage= 100%, between model( 237 aa) positions 1; 237  
 length is 227aa with 14 gaps, 1 stops, absolute frame=  
 Minus2"  
 CDS complement(3510889..3510489)  
 /colour="255 0 0"  
 /evidence=predicted  
 /translation="DPDDIPQVGELDELETFVGKKRNKVIWTVVDHFHFGILGWVVG  
 DHS AETFRPLWQAIVCWQ-CFFWVSDGNPVYPGFPIEG----DQIVSKTYMTRVEGEN  
 TRLRHYLARLHRKTL CYSKSV DMLKHSIRLLI-HYLKF"  
 /note="IS1\_ORF2 e-value= 8.3e-32 fragment hit coverage=  
 59.07%, between model( 237 aa) positions 98; 237 length  
 is 134aa with 6 gaps, 0 stops, absolute frame= Minus2"  
 CDS complement(3407053..3406647)  
 /colour="255 0 0"  
 /evidence=predicted  
 /translation="MLLV RPISTESLRL LHRIYHSSRH HQVRQRAHCLILFAQGWP  
 PY TLASLFSVSPKTVYNWLKAWNNRG---FAGLYNH PGRGRKPMFNPDQQQQIYEW  
 T-QA SPIQ-----LNQVLAQIEQQWSVRVSKATV KRV LKQMDMSWHR"  
 /note="IS630 e-value= 8.7e-15 fragment hit coverage=  
 39.63%, between model( 376 aa) positions 1; 149 length is  
 136aa with 13 gaps, 0 stops, absolute frame= Minus2"  
 CDS complement(3406993..3406656)  
 /colour="255 0 0"  
 /evidence=predicted  
 /translation="SSRH HQVRQRAHCLILFAQGWP  
 PY TLASLFSVSPKTVYNWLKAW  
 NNRGFAGLYNH---PGRGRKPMFNPDQQQQIYEW  
 TQASPIQLNQVLAQIEQQWSVR--  
 -VSKATV KRV LKQMDMS"  
 /note="IS481 e-value= 3.5e-09 fragment hit coverage=  
 33.62%, between model( 351 aa) positions 1; 118 length is  
 113aa with 6 gaps, 0 stops, absolute frame= Minus2"  
 CDS complement(2632693..2631567)  
 /colour="255 0 0"  
 /evidence=predicted  
 /translation="FKHLHLGMI sDIKRKSLPAIARAVGLE  
 NHQSLH HFLSESPWVAS  
 hLSDkRLDIILKILDGRR LILLID-----ETGDCKK  
 GKSTDYV KR  
 QYIGNVGKKENGIvAVTAYGLFQGMILPLSFEVYKPR  
 -----ErLKEEDEYLSK  
 PQIAAGMIRQLQGMGFCFELVLADSLYGEAQTNFV  
 NVLEELKLPYILAIRSNHAVWLP  
 AEQAVFAEPWQSFERTFSNGT-----TETRYR  
 QEIIYGQRHHQKRYWLLTDPQTLPENSTS-----YV  
 MAA  
 APE----IKLDEIGDCYGFRTWIEYGLKQSKD-TL  
 GWADFRMTHYEQIEKWWIVMSA  
 FLMVSLFADVFNDS-----CPVAHQHFAQHPw  
 WDNQNG  
 WKNLLNNVR--LIIQPLIS---WNLKRWLEVFPSR  
 ALKKG F"  
 /note="IS4 e-value= 9.9e-07 complete sequence hit  
 coverage= 100%, between model( 486 aa) positions 1; 486  
 length is 376aa with 117 gaps, 0 stops, absolute frame=  
 Minus2"  
 CDS complement(2632693..2631999)  
 /colour="255 0 0"  
 /evidence=predicted  
 /translation="FKHLHLGMI sDIKRKSLPAIARAVGLE  
 NHQSLH HFLSESPWVAS  
 hLSDkRLDIILKILDGRR LILLID-----ETGDCKK  
 GKSTDYV KR  
 QYIGNVGKKENGIvAVTAYGLFQGMILPLSFEVYKPR  
 -----ErLKEEDEYLSK  
 PQIAAGMIRQLQGMGFCFELVLADSLYGEAQTNFV  
 NVLEELKLPYILAIRSNHAVWLP  
 AEQAVFAEPWQSFERTFSNGTTETRYrQEIIYGqr  
 hhQKRY"  
 /note="IS4 e-value= 4.7e-14 fragment hit coverage=  
 51.23%, between model( 486 aa) positions 1; 249 length is  
 232aa with 27 gaps, 0 stops, absolute frame= Minus2"  
 CDS complement(2586391..2586240)

```

/colour="255 0 0"
/evidence=predicted
/translation="QLCLILDNNPTHKG-KMRSQLAIHLEqmgltqsiQVEFLYLPSY
SPKLNLVE"
/note="IS630 e-value= 4.3e-06 fragment hit coverage=
11.70%, between model( 376 aa) positions 279; 322 length
is 51aa with 1 gaps, 0 stops, absolute frame= Minus2"
CDS complement(2459947..2458710)
/colour="255 0 0"
/evidence=predicted
/translation="IRIPLNLPDI--RVLELSKTERGDWL-----IKIESTLQGTTC
HQCGREITDL-HCHDQ-PFRIRHLPLFEVPVYLEIRPKRYRCKYCDDhpTTTQHLEWH
EPRSPNTKAYERWLLRILIN-STVSDVARKLGVSEDIVSGIIDRWIAAQVDWSEYADL
KVMGMDEISLKRG--HR---DFVVLITIPTTdgVDILAVLADRKQOTVANFLOSIP-I
DLRQTIERVCTDMYQGFVSAVREQLPQAKIVIDRFHVTKAYRNCADTVRKREVKRLRR
ELS-----KQEYD-----SIKGAMWPFKRKPENLKES-EQOLLERLFA--
YSPQLKQAYNLREKLTQIFEGRYTKHGAKCAIRAWCKQVLKSDiKEFDCFLT
INNWMDEMTNYFLEG-WTSGFVEGFNNRVKVLKRRCYGIFDIERLRFQRI
SLDLNGYQTFAVTXTL"
/note="ISL3 e-value= 1.8e-43 complete sequence hit
coverage= 100%, between model( 451 aa) positions 1; 451
length is 413aa with 44 gaps, 1 stops, absolute frame=
Minus2"
CDS complement(2459788..2458710)
/colour="255 0 0"
/evidence=predicted
/translation="RIRHLPLFEVPVYLEIRPKRYRCKYCDDhpTTTQHLEWHEPRSP
NTKAYERWLLRILIN-STVSDVARKLGVSEDIVSGIIDRWIAAQVDWSEYADL
KVMGMDEISLKRG--HR---DFVVLITIPTTdgVDILAVLADRKQOTVANFLOSIP-IDL
RQTIERVCTDMYQGFVSAVREQLPQAKIVIDRFHVTKAYRNCADTVRKREVKRLR
RELS-----KQEYD-----SIKGAMWPFKRKPENLKES-EQOLLERLFA--
YSPQLKQAYNLREKLTQIFEGRYTKHGAKCAIRAWCKQVLKSDiKEFDCFLT
TINNWMDEMTNYFLEG-WTSGFVEGFNNRVKVLKRRCYGIFDIERLRFQRI
SLDLNGYQTFAVTXTL"
/note="ISL3 e-value= 1e-49 fragment hit coverage= 86.03%,
between model( 451 aa) positions 64; 451 length is 360aa
with 34 gaps, 1 stops, absolute frame= Minus2"
CDS complement(2413129..2412849)
/colour="255 0 0"
/evidence=predicted
/translation="PMSHLIDTLKQVPDFRSARGRTHPLWLLLLLMMVMGMLAGYQGYC
PLETFTSDYQQPLCELLGLENF-----QVPSHCTFRRVMKGLDFQSLSHQFEAWM"
/note="ISAs1 e-value= 1.2e-14 fragment hit coverage=
25.45%, between model( 389 aa) positions 1; 99 length is
94aa with 5 gaps, 0 stops, absolute frame= Minus2"
CDS complement(2413129..2412096)
/colour="255 0 0"
/evidence=predicted
/translation="PMSHLIDTLKQVPDFRSARGRTHPLWLLLLLMMVMGMLAGYQGYC
PLETFTSDYQQPLCELLGLENF-----QVPSHCTFRRVMKGLDFQSLSHQFEAWMl
skaqthspDNYAASMDGK-RIC---QGLTDENGKQRFVG---LVSIFAVEAGITL
KLEALTQEDNsEIKVVQALLETQLDGLLITMDALHAQKNTSAS-CGFGX-----
XLSYRRXAQSGPSLRPPDLL-XVSXTHGxayplHTEXRTRGTSVYPGLXACRHS
PTR-VGSHSLGALCPAMGYSSRQG----VSQH-----GLLHQFS-----
CHLTPSLAISGPRALGHXKS-----VALAEGCGLWXRXLSTRGXTSTAQLVSAX
NHCDXYSASKRLSIPQ"
/note="ISAs1 e-value= 7e-07 complete sequence hit
coverage= 100%, between model( 389 aa) positions 1; 389
length is 345aa with 59 gaps, 13 stops, absolute frame=
Minus2"

```

CDS complement(2404702..2404278)  
/colour="255 0 0"  
/evidence=predicted  
/translation="GRQRFNVLGALNAVTKEvTSITNHTYINSHSMCLLLAKLALLDP  
VI--PISVILDNARYQKCQLVTDFAEIVD--IELVYLPSYSPHLNLIERLWRFVVRKEC  
LYSKYYSDFHSGFKGAIQQCIDQCNTTEHKAKLTSLLSLKFQSFQK"  
/note="IS630 e-value= 6.2e-18 fragment hit coverage=  
38.56%, between model( 376 aa) positions 232; 376 length  
is 142aa with 4 gaps, 0 stops, absolute frame= Minus2"

CDS complement(2284996..2284359)  
/colour="255 0 0"  
/evidence=predicted  
/translation="MASKTTNVkPVVVSLWKLLSKSELIHPLKAXSISYCLKRYLWQV  
L-----PGS-----VMFLKAGYKSTXTVSMKQCLVLXTYHQKGR-----  
---LTLOQDEMWSFVNDKSNKQWIWLALDVITREIVGVYVGARSKQGARQLWNSLPGI  
YRQCAVaYTDfWDAYGCVFPKQ-RHQAVGKETGQTCYIERFNCTMRQRVSRVLVRKTL  
FSKKLENHIGAIWMFVHHYNAS"  
/note="IS1\_ORF2 e-value= 4.6e-13 complete sequence hit  
coverage= 100%, between model( 237 aa) positions 1; 237  
length is 213aa with 27 gaps, 3 stops, absolute frame=  
Minus2"

CDS complement(2284744..2284368)  
/colour="255 0 0"  
/evidence=predicted  
/translation="DEMWSFVNDKSNKQWIWLALDVITREIVGVYVGA----RSKQGA  
RQLwNSLPGIYRQCAVaYTDfWDAYgCVFPKQRHQAVGKETgQTCYIERFNCTMRQRV  
SRVLVRKTLFSKKLENHIGAIWMF---VHHY"  
/note="IS1\_ORF1 e-value= 4.6e-14 fragment hit coverage=  
53.97%, between model( 239 aa) positions 111; 239 length  
is 126aa with 7 gaps, 0 stops, absolute frame= Minus2"

CDS complement(2284744..2284359)  
/colour="255 0 0"  
/evidence=predicted  
/translation="DEMWSFVNDKSNKQWIWLALDVITREIVGVYVGARSKQGARQLW  
NSLPGIYRQCAVaYTDfWDAYGCVFPKQ-RHQAVGKETGQTCYIERFNCTMRQRVSRV  
LVRKTLFSKKLENHIGAIWMFVHHYNAS"  
/note="IS1\_ORF2 e-value= 6.2e-32 fragment hit coverage=  
54.43%, between model( 237 aa) positions 109; 237 length  
is 129aa with 1 gaps, 0 stops, absolute frame= Minus2"

CDS complement(2088655..2088024)  
/colour="255 0 0"  
/evidence=predicted  
/translation="TQTLDRTXRAM-----PTAYDSLTTLOWELLEPLIPAAK----  
---PGGRPRTDMRSVLNAIFYLVTGQWRQLPHDFPCWSTVYSYFRRWRDDGTWVH  
INEHLRMQERVSEDRHPSAAICDAQSVKVG--NPR-----  
-----CHTNS-----LIEXPLXSKHPR-----YKNIPLEKPPPSGR  
GYXYAQIKRSP-----VPQ-----XNQSFCLXKAFLGPAAIALP  
DXVLdyETAVQSATHSQAIEP"  
/note="IS5\_IS1031 e-value= 3.4e-16 complete sequence hit  
coverage= 100%, between model( 295 aa) positions 1; 295  
length is 211aa with 86 gaps, 7 stops, absolute frame=  
Minus2"

CDS complement(2088613..2088297)  
/colour="255 0 0"  
/evidence=predicted  
/translation="YDSLTTLOWELLEPLIPAAK-----PGGRPRTDMRSVLNA  
IFYLVTGQWRQLPHDFPCWSTVYSYFRRWRDDGTWVHINEHLRMQERVSEDRHPS  
AAICDAQSVK"  
/note="IS5\_IS1031 e-value= 7.2e-51 fragment hit coverage=  
38.31%, between model( 295 aa) positions 20; 132 length



is 106aa with 7 gaps, 0 stops, absolute frame= Minus2"

CDS complement(2088604..2088366)  
/colour="255 0 0"  
/evidence=predicted  
/translation="DLTTLQWELLEPLIPAAKP-GGRPRT-TDMRSVLNAIFYLVVTG  
CQWRQLPHDFPCWSTVYSYFRRWRDDGTWVHINEHLRM"  
/note="IS5\_IS427 e-value= 9.2e-19 fragment hit coverage=  
27.70%, between model( 296 aa) positions 125; 206 length  
is 80aa with 2 gaps, 0 stops, absolute frame= Minus2"

CDS complement(2087236..2086668)  
/colour="255 0 0"  
/evidence=predicted  
/translation="SQISIRKGLGM-----RDKY-----Q-----  
-----QRATP-----IIQVTH-----IWNWY-----  
-----HSI----GFDGGKMKVGRKRHVLVD  
TLGLVLMVMVTAANISDQR-GAKMLFWKARRQGaslSRLVRIWADAGYQGQAFMKWVM  
DRFOYVLEVIKRSNDLAGFQVVPKRWIVERTFGWLLWSRRLNKDYEVLTRTTEALAYV  
AMIRLMVRRRLAQEYXNFSNSLX"  
/note="IS5\_IS1031 e-value= 2.9e-19 complete sequence hit  
coverage= 100%, between model( 295 aa) positions 1; 295  
length is 190aa with 108 gaps, 2 stops, absolute frame=  
Minus2"

CDS complement(2087131..2086668)  
/colour="255 0 0"  
/evidence=predicted  
/translation="GFDGGKMKVGRKRHVLVDTLGLVLMVMVTAANISDQR-GAKMLF  
WKARRQGaslSRLVRIWADAGYQGQAFMKWVMDFQYVLEVIKRSNDLAGFQVVPKRW  
IVERTFGWLLWSRRLNKDYEVLTRTTEALAYVAMIRLMVRRRLAQEYXNFSNSLX"  
/note="IS5\_IS1031 e-value= 2.2e-60 fragment hit coverage=  
51.86%, between model( 295 aa) positions 143; 295 length  
is 155aa with 1 gaps, 2 stops, absolute frame= Minus2"

CDS complement(1894558..1894341)  
/colour="255 0 0"  
/evidence=predicted  
/translation="RIRFVYIPKHTSWLNQIECWFSILVRRLLIRRGNFTSKDDLQORI  
LEFIEYFNHtMAKPFQWQFKGFQPRXLXLM"  
/note="IS630 e-value= 4e-10 fragment hit coverage=  
19.15%, between model( 376 aa) positions 305; 376 length  
is 73aa with 0 gaps, 1 stops, absolute frame= Minus2"

CDS complement(1894510..1894401)  
/colour="255 0 0"  
/evidence=predicted  
/translation="IECWFSILVRRLLIR--RGNFTSKDDLQORILEFIEYFNH"  
/note="IS3\_IS150\_ORF2 e-value= 2e-08 fragment hit  
coverage= 10.03%, between model( 389 aa) positions 329;  
367 length is 37aa with 2 gaps, 0 stops, absolute frame=  
Minus2"

CDS complement(1226248..1225905)  
/colour="255 0 0"  
/evidence=predicted  
/translation="KYIVTLTPEERSELIQLTRRRRTLSARKMKRAQILMLADEGHKDD  
TITQMLNAGISTVHRTRQKFVEGG---VEfALNERPRPGGQKKLDSKAEALLIATACS  
DPPTG----CCRWTMQLLAE"  
/note="IS630 e-value= 1.2e-15 fragment hit coverage=  
32.18%, between model( 376 aa) positions 1; 121 length is  
115aa with 7 gaps, 0 stops, absolute frame= Minus2"

CDS complement(1119469..1119321)  
/colour="255 0 0"  
/evidence=predicted  
/translation="LMNSGLFRLPGKKHLIQGFERPDVVVMDVTETPIERPQKGQKAY

YAGKKR"  
 /note="IS5\_ISL2 e-value= 1.8e-17 fragment hit coverage= 19.23%, between model( 260 aa) positions 80; 129 length is 50aa with 0 gaps, 0 stops, absolute frame= Minus2"  
 CDS complement(669352..668715)  
 /colour="255 0 0"  
 /evidence=predicted  
 /translation="MASKTTNVkPVVVSLWKLLSKSELIHPLKAXSISYCLKRYLWQV L-----PGS-----VMFLKAGYKSTXTVsMKQCLVLXTYHQKGR-----  
 ---LTLQCDEMWSFVNDKSNKQWIWLALDVITREIVGVYVGARSKQGARQLWNSLPGI YRQCAVaYTDfWDAYGCVFPKQ-RHQAVGKETGQTCYIERFNCTMRQRVSRRLVVRKTL SFSKKLENHIGAIWMFVHHYNAS"  
 /note="IS1\_ORF2 e-value= 4.6e-13 complete sequence hit coverage= 100%, between model( 237 aa) positions 1; 237 length is 213aa with 27 gaps, 3 stops, absolute frame= Minus2"  
 CDS complement(669100..668724)  
 /colour="255 0 0"  
 /evidence=predicted  
 /translation="DEMWSFVNDKSNKQWIWLALDVITREIVGVYVGA----RSKQGA RQLwNSLPGIYRQCAVaYTDfWDAYgCVFPKQRHQAVGKETgQTCYIERFNCTMRQRV SRRLVVRKTL SFSKKLENHIGAIWMF---VHHY"  
 /note="IS1\_ORF1 e-value= 4.6e-14 fragment hit coverage= 53.97%, between model( 239 aa) positions 111; 239 length is 126aa with 7 gaps, 0 stops, absolute frame= Minus2"  
 CDS complement(669100..668715)  
 /colour="255 0 0"  
 /evidence=predicted  
 /translation="DEMWSFVNDKSNKQWIWLALDVITREIVGVYVGARSKQGARQLW NSLPGIYRQCAVaYTDfWDAYGCVFPKQ-RHQAVGKETGQTCYIERFNCTMRQRVSR RLVRKTL SFSKKLENHIGAIWMFVHHYNAS"  
 /note="IS1\_ORF2 e-value= 6.2e-32 fragment hit coverage= 54.43%, between model( 237 aa) positions 109; 237 length is 129aa with 1 gaps, 0 stops, absolute frame= Minus2"  
 CDS complement(557656..557520)  
 /colour="255 0 0"  
 /evidence=predicted  
 /translation="WQTDGWEGYSRQLANE---VIHHVSKALTQRLERTNGILRQOTS RWHRR"  
 /note="IS1\_ORF2 e-value= 1.2e-12 fragment hit coverage= 20.68%, between model( 237 aa) positions 164; 212 length is 46aa with 3 gaps, 0 stops, absolute frame= Minus2"  
 CDS complement(522460..522219)  
 /colour="255 0 0"  
 /evidence=predicted  
 /translation="VKLAELIPWESFESEYADQFSQ---TMGAPAKPFRVALGTLIIK EKLGISDAETVEQIRENPYLOQYFLGFSEYRESAPFDASML"  
 /note="IS5\_IS5 e-value= 2.6e-06 fragment hit coverage= 19.91%, between model( 422 aa) positions 23; 106 length is 81aa with 3 gaps, 0 stops, absolute frame= Minus2"  
 CDS complement(481126..480390)  
 /colour="255 0 0"  
 /evidence=predicted  
 /translation="-----TGVYKRTFkpMLHAWHTYHLRSRN--AGRPPKLCRCQD LVALQYWREYR TYFH IAGDWEVSESTVCRIVHQVETALMNSGLFRLPGQKSLLOGFER PDVVVMDVTETPIERPQTRQKAYYSGKKRDIPSNTRLSLTATLXRLSALT-----  
 --LVQVGMIFrssrfqvSISIQIPRVCKIADIKGLQPII--PTAM----FLSRSHNT VNXLPCESEITVLXVRNEWALNTLIAAXRFSEFCRSAIAIVVVATRCGVTX"  
 /note="IS5\_ISL2 e-value= 1.9e-21 complete sequence hit coverage= 100%, between model( 260 aa) positions 1; 260

length is 246aa with 23 gaps, 5 stops, absolute frame= Minus2"

CDS complement(481066..480756)  
/colour="255 0 0"  
/evidence=predicted  
/translation="SRSNAGRPPKLCRCQDLLVALQYWREYRITYFHIAGDWEVSESTV  
CRIVHQVETALMNSGLFRLPGQKSLQGFERPDVVVMDVTETPIERPQTRQKAYYS GK  
KR"  
/note="IS5\_ISL2 e-value= 9.3e-44 fragment hit coverage= 40%, between model( 260 aa) positions 26; 129 length is 104aa with 0 gaps, 0 stops, absolute frame= Minus2"

CDS complement(475153..474390)  
/colour="255 0 0"  
/evidence=predicted  
/translation="SPYQHLSLYLKKLRLSHMLTHWESIESQA-MQENWSYAEFLAL  
CETKAQRREQARLKRALTEARLPNA-KSFTNDFDFSHCPQLNPAPLMQLAAdPGWLER  
ENCLILGPSGVGKTHLATGVSKKMLEFGKRVKFFAANALVQHLQOAKLQLOLH-PMLK  
KLDRYDLLVLDDDLGYCKKSEAETSVLFELIAHRYERKSLITANQPFQWDDIFT-DS  
MMAVAADRLIHHGLIIKIQADSYRRKSATQRTAQTQSPPO"  
/note="IS21\_ORF2 e-value= 7.2e-80 complete sequence hit coverage= 100%, between model( 258 aa) positions 1; 258 length is 255aa with 4 gaps, 0 stops, absolute frame= Minus2"

CDS complement(475153..474390)  
/colour="255 0 0"  
/evidence=predicted  
/translation="SPYQHLSLYLKKLRLSHMLTHWESIESQA-MQENWSYAEFLAL  
CETKAQRREQARLKRALTEARLPNA-KSFTNDFDFSHCPQLNPAPLMQLAAdPGWLER  
ENCLILGPSGVGKTHLATGVSKKMLEFGKRVKFFAANALVQHLQOAKLQLOLH-PMLK  
KLDRYDLLVLDDDLGYCKKSEAETSVLFELIAHRYERKSLITANQPFQWDDIFT-DS  
MMAVAADRLIHHGLIIKIQADSYRRKSATQRTAQTQSPPO"  
/note="IS21\_ORF2 e-value= 1.9e-80 complete sequence hit coverage= 100%, between model( 258 aa) positions 1; 258 length is 255aa with 4 gaps, 0 stops, absolute frame= Minus2"

CDS complement(466177..466083)  
/colour="255 0 0"  
/evidence=predicted  
/translation="AERG--ITLVELPSYSPHLNLIERLWQFMKYQWI"  
/note="IS630 e-value= 1.7e-09 fragment hit coverage= 9.04%, between model( 376 aa) positions 300; 333 length is 32aa with 2 gaps, 0 stops, absolute frame= Minus2"

CDS complement(339451..339123)  
/colour="255 0 0"  
/evidence=predicted  
/translation="MVENRRGNHTVTRLTVHIVWVTKYRYQVLKGEVQKRCRELLIQI  
CDAEDIRILKGVVSKDHVHMLIEYPPSKSISDIVKCLKGRTSRRLQOEYREXEKRYWG  
KHLWAIGY"  
/note="IS605 e-value= 3e-25 fragment hit coverage= 72.37%, between model( 152 aa) positions 1; 110 length is 110aa with 0 gaps, 1 stops, absolute frame= Minus2"

CDS complement(339451..338973)  
/colour="255 0 0"  
/evidence=predicted  
/translation="MVENRRGNHTVTRLTVHIVWVTKYRYQVLKGEVQKRCRELLIQI  
CDAEDIRILKGVVSKDHVHMLIEYPPSKSISDIVKCLKGRTSRRLQOEYREXEKRYWG  
KHLWAIGYGAWSTGnISEQMVEEYLEHHrlvsnnDLDTFMLEXIrTLVLRGTGLSVDK  
"  
/note="IS605 e-value= 2.6e-17 complete sequence hit coverage= 100%, between model( 152 aa) positions 1; 152

length is 160aa with 0 gaps, 2 stops, absolute frame= Minus2"

CDS complement(339448..339063)  
/colour="255 0 0"  
/evidence=predicted  
/translation="VENRRGNHTVTRLTVHIVVWTKYRYQVLKGEVQKRCRELLI-QI  
CDAEDIRILKGVVSKDHVHMLIEYPPSKSISDIVKCLKGRTSRRLQQEYREXEKRYWG  
KHLWAIGYGAWSTGNISEQMVEEYLEHH"  
/note="IS200 e-value= 1.2e-47 fragment hit coverage= 84.42%, between model( 154 aa) positions 1; 130 length is 129aa with 1 gaps, 1 stops, absolute frame= Minus2"

CDS complement(339448..339015)  
/colour="255 0 0"  
/evidence=predicted  
/translation="VENRRGNHTVTRLTVHIVVWTKYRYQVLKGEVQKRCRELLI-QI  
CDAEDIRILKGVVSKDHVHMLIEYPPSKSISDIVKCLKGRTSRRLQQEYREXEKRYWG  
KHLWAIGYGAWSTGNISEQMVEEYLEHHRLVSNNDL-----DTFMLEXI"  
/note="IS200 e-value= 1.5e-46 complete sequence hit coverage= 100%, between model( 154 aa) positions 1; 154 length is 145aa with 9 gaps, 2 stops, absolute frame= Minus2"

CDS complement(339448..339063)  
/colour="255 0 0"  
/evidence=predicted  
/translation="VENRRGNHTVTRLTVHIVVWTKYRYQVLKGE-VQKRCRELLIQI  
CDAEDIRILKGVVSKDHVHMLIEYPPSKSISDIVKCLKGRTSRRLQQEYREXEKRYWG  
KHLWAIGYGAWSTGNISEQMVEEYLEHH"  
/note="IS200\_IS605 e-value= 1.3e-45 fragment hit coverage= 84.97%, between model( 153 aa) positions 1; 130 length is 129aa with 1 gaps, 1 stops, absolute frame= Minus2"

CDS complement(339448..338994)  
/colour="255 0 0"  
/evidence=predicted  
/translation="VENRRGNHTVTRLTVHIVVWTKYRYQVLKGE-VQKRCRELLIQI  
CDAEDIRILKGVVSKDHVHMLIEYPPSKSISDIVKCLKGRTSRRLQQEYREXEKRYWG  
KHLWAIGYGAWSTGNISEQMVEEYLEHHRLVSNNDLDTFMLEXIRTLVLRG"  
/note="IS200\_IS605 e-value= 4.2e-45 complete sequence hit coverage= 100%, between model( 153 aa) positions 1; 153 length is 152aa with 1 gaps, 2 stops, absolute frame= Minus2"

CDS complement(323713..323475)  
/colour="255 0 0"  
/evidence=predicted  
/translation="RNQQHYIRQLTAIKLLNEGHSRTQVSEQVGCSDTLTRWMDKY  
LDGGLQGLVQSI--RHQKPSRLSPEEQQLKEMVLTQR"  
/note="IS481 e-value= 6.3e-08 fragment hit coverage= 23.36%, between model( 351 aa) positions 1; 82 length is 80aa with 2 gaps, 0 stops, absolute frame= Minus2"

CDS complement(323686..323280)  
/colour="255 0 0"  
/evidence=predicted  
/translation="RLTAIKLLNEGHSRTQVSEQVGCSDTLTRWMDKYLDGG---LQ  
GLVQSIRHQKPSRLSPEEQQLKEMVLTQRPTDYGIDRNMWTGAILAVVIEQRFEVQL  
KDSRIYELLSELGLSYQRAHRDYA--NADLNAQKEWVAA"  
/note="IS630 e-value= 9.2e-30 fragment hit coverage= 37.50%, between model( 376 aa) positions 30; 170 length is 136aa with 5 gaps, 0 stops, absolute frame= Minus2"

CDS complement(322042..321891)  
/colour="255 0 0"

/evidence=predicted  
 /translation="QLCLILDNNPETHKG-KMRSQLAIHLEqmgltqsiQVEFLYLPSY  
 SPKLNLVE"  
 /note="IS630 e-value= 4.3e-06 fragment hit coverage=  
 11.70%, between model( 376 aa) positions 279; 322 length  
 is 51aa with 1 gaps, 0 stops, absolute frame= Minus2"  
 CDS complement(259486..259350)  
 /colour="255 0 0"  
 /evidence=predicted  
 /translation="WQTDGWEGYARQLPDE---VVHEVSKALTQRLERTNGIVRQQTG  
 RWHRR"  
 /note="IS1\_ORF2 e-value= 1.8e-11 fragment hit coverage=  
 20.68%, between model( 237 aa) positions 164; 212 length  
 is 46aa with 3 gaps, 0 stops, absolute frame= Minus2"  
 CDS complement(127654..127374)  
 /colour="255 0 0"  
 /evidence=predicted  
 /translation="PMSHLIDTLKQVPDFRSARGRTHPLWLLLLLMMVMGLAGYQGYC  
 PLETFTSDYQQPLCELLGLENF-----QVPSHCTFRRVMKGLDFQSLSHQFEAWM"  
 /note="ISAs1 e-value= 1.2e-14 fragment hit coverage=  
 25.45%, between model( 389 aa) positions 1; 99 length is  
 94aa with 5 gaps, 0 stops, absolute frame= Minus2"  
 CDS complement(105898..105813)  
 /colour="255 0 0"  
 /evidence=predicted  
 /translation="ITYHKLHFHTEWECKYRVVFIPKYCQKCIY"  
 /note="IS200 e-value= 2.1e-06 fragment hit coverage=  
 18.83%, between model( 154 aa) positions 1; 29 length is  
 29aa with 0 gaps, 0 stops, absolute frame= Minus2"  
 CDS complement(105898..105807)  
 /colour="255 0 0"  
 /evidence=predicted  
 /translation="ITYHKLHFHTEWECKYRVVFIPKYCQKCIYSN"  
 /note="IS200\_IS605 e-value= 4.7e-06 fragment hit  
 coverage= 20.26%, between model( 153 aa) positions 1; 31  
 length is 31aa with 0 gaps, 0 stops, absolute frame=  
 Minus2"  
 CDS complement(105892..105807)  
 /colour="255 0 0"  
 /evidence=predicted  
 /translation="---YHKLHFHTEWECKYRVVFIPKYCQKCIYSN"  
 /note="IS605 e-value= 9.3e-06 fragment hit coverage=  
 21.05%, between model( 152 aa) positions 1; 32 length is  
 29aa with 3 gaps, 0 stops, absolute frame= Minus2"  
 CDS complement(62245..61035)  
 /colour="255 0 0"  
 /evidence=predicted  
 /translation="DELIGENPQPEdiLGESGLLKRLSKRLVERALAGELTHHLQOSS  
 NDQS-GDeNSNGPRNSRNGYSKKTVQSEQG-EMDLSIPRDRCG-EFEPVLVPKGQRRI  
 A-GLDEKIIALYARGMTTRDIRAQLVELYG--ANISEALISDVTNSVMEEVKDWRSRP  
 LDEV--YPIVYLDALYVNIKVNGQVSKRAVYVALAVTVEGNKELLGLWIGAAerEGAK  
 FWLSVLTDLKNRGTQDILIIACCDGLKGFPOAIESVYPQTQVQVCIVHLIRNSLRHVPW  
 KESRAVAADLKPIYQAATLE-ESEAALDAFAH-KWDETYPGISQIWIRHWDNVAPLFG  
 YPMAIRKVIYTTNAIESLNRSLRKVIKTKAVFPNEESVYKLMFLAMRNISKR-WTRPI  
 LNWKAAALSHFAILFPTRFNXYIH"  
 /note="IS256 e-value= 1.4e-166 complete sequence hit  
 coverage= 100%, between model( 410 aa) positions 1; 410  
 length is 404aa with 11 gaps, 1 stops, absolute frame=  
 Minus2"  
 CDS complement(62245..61035)

```

/colour="255 0 0"
/evidence=predicted
/translation="DELIGENPOPEdiLGESGLLKRLSKRLVERALAGELTHHLOQSS
NDQS-GDeNSNGPRNSRNGYSKKTVOSEQG-EMDLSIPRDRCG-EFEPVLVPGQORRI
A-GLDEKIIALYARGMTRDIRAQLVELYG--ANISEALISDVTNSVMEEVKDWRSRP
LDEV--YPIVYLDALYVNIKVNGQVSKRAVYVALAVTVEGNKELLGLWIGAAerEGAK
FWLSVLTDLKNRGTQDILIIACCDGLKGFPOAIESVYPQTQVQVCIVHLIRNSLRHVPPW
KESRAVAADLKPIYQAATLE-ESEAALDAFAH-KWDETYPGISQIWIRHWDNVAPLFQ
YPMAIRKVIYTTNAIESLNRSLRKVIKTKAVFPNEESVYKLMFLAMRNISKR-WTRPI
LNWKAALSHFAILFPTRFNXIH"
/note="IS256 e-value= 3.7e-167 complete sequence hit
coverage= 100%, between model( 410 aa) positions 1; 410
length is 404aa with 11 gaps, 1 stops, absolute frame=
Minus2"
CDS complement(6379401..6378635)
/colour="255 0 0"
/evidence=predicted
/translation="PCLGRFILIYFTKLQLPPOKKYCDLEXWIISA---IILGYNGGEF
RXLIQPIIwLVLMPVAFRIALLSDIKNLV-----FPSILSXRLFEXXV----KL
SRYXsVNTQTLDRTXRAMPTAYDSDLTTLQWELLEPLIPAAKP-GGRPRT-TDMLSVL
NAIFYLVVVTGCQWRQLPHDFPCWSTVYSYFRRWRDDGTWSQINEHLRMQVRVSE----
-----DRHPSPSAAICDAQSVkvgnpRCHLIGFDGGKM
VKGRKRHVLDVTLGLVLMVMVTAANIS"
/note="IS5_IS427 e-value= 4.4e-06 complete sequence hit
coverage= 100%, between model( 296 aa) positions 1; 296
length is 256aa with 47 gaps, 6 stops, absolute frame=
Minus3"
CDS complement(6379161..6378293)
/colour="255 0 0"
/evidence=predicted
/translation="EKXVKLSRYXSVNTQTLDRTXramptaYDSDLTTLQWELLEPLI
PAAKPG-----GRPRTTDML-----SVLNNAIFYLVVVTGCQWRQ
--LPHDFPCWSTVYSYFRRWRDDGTWSQINEHLRMQVRVSED---RHPSPSAAICDAQ
SVK-----VGNpRcHLIGFD-----GGKM-
-----VKGRKRHVLD-TL
GLVLMVMVTAANISDQRGAK-----ILFWKAQRQGASLSRL
VR----IWADAGYQGQALMKWVMDRFQYVLEVVKRSDNLAGFQVIPKRWIVERTFGWL
LWSRRLNKDYEVLTRTAEALVYVAMIRLMVRRLAQEHX"
/note="IS5_IS5 e-value= 1.8e-09 complete sequence hit
coverage= 100%, between model( 422 aa) positions 1; 422
length is 290aa with 140 gaps, 4 stops, absolute frame=
Minus3"
CDS complement(6379122..6378272)
/colour="255 0 0"
/evidence=predicted
/translation="TQTLDRTXRAM-----PTAYDSDLTTLQWELLEPLIPAAK----
---PGGRPRTTDMLSVLNNAIFYLVVVTGCQWRQLPHDFPCWSTVYSYFRRWRDDGTWSQ
INEHLRMQVRVSEDRHPSPSAAICDAQSVKVGnpRCH-LIGFDGGKMVKGRKRHVLDV
TLGLVLMVMVTAANISDQR-GAKILFWKAQRQGasLSRLVRIWADAGYQGQALMKWV
DRFQYVLEVVKRSDNLAGFQVIPKRWIVERTFGWLLWSRRLNKDYEVLTRTAEALVYV
AMIRLMVRRLAQEHXNFSNSLL"
/note="IS5_IS1031 e-value= 3.6e-111 complete sequence hit
coverage= 100%, between model( 295 aa) positions 1; 295
length is 284aa with 14 gaps, 2 stops, absolute frame=
Minus3"
CDS complement(6379080..6378272)
/colour="255 0 0"
/evidence=predicted
/translation="YDSDLTTLQWELLEPLIPAAK-----PGGRPRTTDMLSVLNA
IFYLVVVTGCQWRQLPHDFPCWSTVYSYFRRWRDDGTWSQINEHLRMQVRVSEDRHPS

```

SAAICDAQSVKVGPNRCH-LIGFDGGKMKVGRKRHVLDVTLGLVLMVMVTAANISDQR  
 -GAKILFWKAQRQGaslSRLVRIWADAGYQGQALMKWVMDRFQYVLEVVKRSDNLAGF  
 QVIPKRWIVERTFGWLLWSRRLNKDYEVLTTRTAEALVYVAMIRLMVRRLAQEHXNFSN  
 SLL"  
 /note="IS5\_IS1031 e-value= 2.4e-113 fragment hit  
 coverage= 93.56%, between model( 295 aa) positions 20;  
 295 length is 270aa with 9 gaps, 1 stops, absolute frame=  
 Minus3"  
 CDS complement(6379071..6378833)  
 /colour="255 0 0"  
 /evidence=predicted  
 /translation="DLTTLQWELLEPLIPAAKP-GGRPRT-TDMLSVLNAIFYLVVTG  
 CQWRQLPHDFPCWSTVYSYFRRWRDDGTWSQINEHLRM"  
 /note="IS5\_IS427 e-value= 2e-19 fragment hit coverage=  
 27.70%, between model( 296 aa) positions 125; 206 length  
 is 80aa with 2 gaps, 0 stops, absolute frame= Minus3"  
 CDS complement(6361275..6360608)  
 /colour="255 0 0"  
 /evidence=predicted  
 /translation="QRFIQGLSPETIHLLSRIHRHSHHHQVRQRAHCILLSFEGFNVT  
 ELMSIFAVTRKTVYTWLDAWDNHC---LVGLYDQPGRGRKPKLRDQV-KEQIREWAKM  
 TP-----HNLNVVLAKIKEAWNIEVSKTTLKRILKSCSMSWRRLRRRVAGQDPD  
 VEYATK-----RHQLEVLKRQEEKGELdlrYLDESGFCLVPYVPY-AWQEKG-ETLGL  
 PSQRSGRFNVLGLMNRHNDLTSYVF"  
 /note="IS630 e-value= 4.6e-12 fragment hit coverage=  
 63.83%, between model( 376 aa) positions 1; 240 length is  
 223aa with 20 gaps, 0 stops, absolute frame= Minus3"  
 CDS complement(6361275..6360251)  
 /colour="255 0 0"  
 /evidence=predicted  
 /translation="QRFIQGLSPETIHLLSRIHRHSHHHQVRQRAHCILLSFEGFNVT  
 ELMSIFAVTRKTVYTWLDAWDNHC---LVGLYDQPGRGRKPKLRDQV-KEQIREWAKM  
 TP-----HNLNVVLAKIKEAWNIEVSKTTLKRILKSCSMSWRRLRRRVAGQDPD  
 VEYATK-----RHQLEVLKRQEEKGELdlrYLDESGFCLVPYVPY-AWQEKG-----  
 -----ETLGLPSQRSGRFNVLGLMNRHNDLTSYVFDKITSAVVVACIDDFSQTC  
 DQHT----VVMDQASIHKNTEIEENIEDWKAKNVEIFWLPTYSPHLNLIIEIFWRFMK  
 YEWLEFDAYKCLGSLSLYIDKILKGFGR--DYVIDFGXVLSVLLFGY"  
 /note="IS630 e-value= 3.7e-16 complete sequence hit  
 coverage= 100%, between model( 376 aa) positions 1; 376  
 length is 342aa with 39 gaps, 1 stops, absolute frame=  
 Minus3"  
 CDS complement(6360546..6360377)  
 /colour="255 0 0"  
 /evidence=predicted  
 /translation="DQHTVVVMDQASIHKNTEIEENIEDWKAKNVEIFWLPTYSPHLN  
 LIEIFWRFMKYEW"  
 /note="IS630 e-value= 1.9e-12 fragment hit coverage=  
 14.89%, between model( 376 aa) positions 277; 332 length  
 is 57aa with 0 gaps, 0 stops, absolute frame= Minus3"  
 CDS complement(6350184..6349745)  
 /colour="255 0 0"  
 /evidence=predicted  
 /translation="-RNVTXEAKSYDMGLHHIVFIPKRRRRVIYGSLRIRLGVLFRLD  
 AEQRDVEILEGHLLPDHVMCMSIPPKHAVSGVVGFMKGKSAIAIARQFMGKRRNYSG  
 ESFWAXGYVSTVDLYEGMVRAYIRNQELENDARLEQLSLPLGX----CXR"  
 /note="IS605 e-value= 1e-36 complete sequence hit  
 coverage= 100%, between model( 152 aa) positions 1; 152  
 length is 147aa with 5 gaps, 4 stops, absolute frame=  
 Minus3"  
 CDS complement(6350172..6349730)

```

/colour="255 0 0"
/evidence=predicted
/translation="XEAKSYDMGLH----HIVFIPKRRRRVIYGSLRIRLGVLFR-DL
AEQRDVEILEGHLLPDHVHMCMSIPPKHAVSGVVGFMKGKSAIAIARQFMGKRRNYSG
ESFWAXGYVSTVD-LYEGMVRAYIRNQELEDARLEQLSLPLGXCRVAPWG"
/note="IS200 e-value= 2.5e-35 complete sequence hit
coverage= 100%, between model( 154 aa) positions 1; 154
length is 148aa with 6 gaps, 4 stops, absolute frame=
Minus3"
CDS complement(6350172..6349733)
/colour="255 0 0"
/evidence=predicted
/translation="XEAKSYDMGLH----HIVFIPKRRRRVIYGS-LRIRLGVLFRDL
AEQRDVEILEGHLLPDHVHMCMSIPPKHAVSGVVGFMKGKSAIAIARQFMGKRRNYSG
ESFWAXGYVSTVD-LYEGMVRAYIRNQELEDARLEQLSLPLGXCRVAPW"
/note="IS200_IS605 e-value= 8.1e-37 complete sequence hit
coverage= 100%, between model( 153 aa) positions 1; 153
length is 147aa with 6 gaps, 4 stops, absolute frame=
Minus3"
CDS complement(6350139..6349763)
/colour="255 0 0"
/evidence=predicted
/translation="HIVFIPKRRRRVIYGSLRIRLGVLFR-DLAEQRDVEILEGHLLP
DHVHMCMSIPPKHAVSGVVGFMKGKSAIAIARQFMGKRRNYSGESFWAXGYVSTVD-
LYEGMVRAYIRNQELEDARLEQLSLP"
/note="IS200 e-value= 1.2e-40 fragment hit coverage=
83.12%, between model( 154 aa) positions 16; 143 length
is 126aa with 2 gaps, 1 stops, absolute frame= Minus3"
CDS complement(6350139..6349760)
/colour="255 0 0"
/evidence=predicted
/translation="HIVFIPKRRRRVIYGS-LRIRLGVLFRDLAEQRDVEILEGHLLP
DHVHMCMSIPPKHAVSGVVGFMKGKSAIAIARQFMGKRRNYSGESFWAXGYVSTVD-
LYEGMVRAYIRNQELEDARLEQLSLPL"
/note="IS200_IS605 e-value= 7.4e-40 fragment hit
coverage= 84.31%, between model( 153 aa) positions 16;
144 length is 127aa with 2 gaps, 1 stops, absolute frame=
Minus3"
CDS complement(6350139..6349760)
/colour="255 0 0"
/evidence=predicted
/translation="HIVFIPKRRRRVIYGSLRIRLGVLFRDLAEQRDVEILEGHLLPD
HVHMCMSIPPKHAVSGVVGFMKGKSAIAIARQFMGKRRNYSGESFWAXGYVSTVDLY
EGMVRAYIRNQELEDARLEQLSLPL"
/note="IS605 e-value= 2.1e-41 fragment hit coverage=
83.55%, between model( 152 aa) positions 17; 143 length
is 127aa with 0 gaps, 1 stops, absolute frame= Minus3"
CDS complement(6347595..6346655)
/colour="255 0 0"
/evidence=predicted
/translation="TKNRXPMSYQIRNWSEYNAGLKQRGSVTFWLEQS--AIVHWLET
TPRQKRGASLTYSDTAISTFETVKCIYGLAGRQTEGFLNSLFELMGIELPVCDHSTVS
RRKGQLSISLPVIPKQGAIHVVIDSTGVKVG-----EGEWKTRQHGVS-K
RRTWRKLHLSVDESTGEILTGVVTTNDVQDGEVFEDLLEGIDD-----EIEQVSAD-G
AYDQSHCYDALMERNATAAIPPRKNA-----KIWQHGNC--NApphpRDQ
NLRAIRKQGRKRWKKQAHYHRRSLAETTMFRFKTIFGGQVRSRNFNDNQATELLLOCA
LN-RMIQIAKPETVWVE"
/note="IS5_IS903 e-value= 1.1e-96 complete sequence hit
coverage= 100%, between model( 347 aa) positions 1; 347
length is 314aa with 37 gaps, 1 stops, absolute frame=

```



Minus3"  
CDS complement(6347595..6346655)  
/colour="255 0 0"  
/evidence=predicted  
/translation="TKNRXPMSYQIRNWSEYNAGLKQRGSVTFWLEQS--AIVHWLET  
TPRQKRGASLTYSDTAISTFETVKCIYGLAGRQTEGFLNSLFELMGIELPVC DHSTVS  
RRKGQLSISLPVIPKQGAIHVVIDSTGVKVIY-----EGEWKTRQHGVS-K  
RRTWRKLHLSVDESTGEILTGVVTTNDVQDGEVFE DLLEGIDD-----EIEQVSAD-G  
AYDQSHCYDALMERNATAAIPPRKNA-----KIWQHGC--NApphrDQ  
NLRAIRKQGRKRWKKQAHYHRRSLAETTMFRFKTIFGGQVRSRNFNDQATELLQLCAA  
LN-RMIQIAKPETVWVE"  
/note="IS5\_IS903 e-value= 2.2e-96 complete sequence hit  
coverage= 100%, between model( 347 aa) positions 1; 347  
length is 314aa with 37 gaps, 1 stops, absolute frame=  
Minus3"

CDS complement(6338160..6337466)  
/colour="255 0 0"  
/evidence=predicted  
/translation="FKHLHLGMI sDIKRKSLPAIARAVGLENHQSLHHLFSESPPWVAS  
hLSDkRLDIILKILDGRRLILLID-----ETGDCKK GKSTDYVKR  
QYIGNVGKKENGIvAVTAYGLFQGMILPLSFEVYKPR-----ErLKEEDEYLSK  
PQIAAGMIRQLQGMGF CFELVLADSLYGEAQTNFVNVLEELKLPYILAIRSNHAVWLP  
AEQAVFAEPWQSFERTFSNGTTETRYrQEIIYGqrhhQKRY"  
/note="IS4 e-value= 4.7e-14 fragment hit coverage=  
51.23%, between model( 486 aa) positions 1; 249 length is  
232aa with 27 gaps, 0 stops, absolute frame= Minus3"

CDS complement(6338160..6337034)  
/colour="255 0 0"  
/evidence=predicted  
/translation="FKHLHLGMI sDIKRKSLPAIARAVGLENHQSLHHLFSESPPWVAS  
hLSDkRLDIILKILDGRRLILLID-----ETGDCKK GKSTDYVKR  
QYIGNVGKKENGIvAVTAYGLFQGMILPLSFEVYKPR-----ErLKEEDEYLSK  
PQIAAGMIRQLQGMGF CFELVLADSLYGEAQTNFVNVLEELKLPYILAIRSNHAVWLP  
AEQAVFAEPWQSFERTFSNGT-----TETRYR  
QEIIYGQRHHQKRYWLLTTDPQTLPENSTS-----YVMAA  
APE----IKLDEIGDCYGFRTWIEYGLKQSKD-TLGWADFRMTHYEQIEKWWEIVMSA  
FLMVSLFADVFNDS-----CPVAHQHFAQHPwWDNONG  
WKNLLNNVR--LIIQPLIS----WNLLKRWLEVFPSRALKKGF"  
/note="IS4 e-value= 9.9e-07 complete sequence hit  
coverage= 100%, between model( 486 aa) positions 1; 486  
length is 376aa with 117 gaps, 0 stops, absolute frame=  
Minus3"

CDS complement(6335550..6334313)  
/colour="255 0 0"  
/evidence=predicted  
/translation="IRIPLNLPDI--RVLELSKTERGDWL-----IKIESTLQGTTC  
HQCGREITDL-HCHDQ-PFRIRHLPLFEVPVYLEIRPKRYRCKYCD DhpTTTQHLEWH  
EPRSPNTKAYERWLLRILIN-STVSDVARKLGVSE DIVSGIIDRWIAAQVDWSEYADL  
KVMGMDEISLKR G--HR---DFVVLITIP TtdgVDILAVLADRKQQTVANFLQSIP-I  
DLRQTIERVCTDMYQGFVSAVREQLPQAKIVIDRFHVTKAYRNCADTVRKREVKRLRR  
ELS-----KQEYD-----SIKGAMWPFKRKPENLKES-EQQLLER  
LFA--YSPQLKQAYNLREKLTQIFEGRYTKHGAKcAIRAWCKQVlKSGIKEFDSFLT  
INNWMDEMTNYFLEG-WTSGFVEGFNNRVKVLKRRCYGIFDIERLFQRISLDLNGYQT  
FAVTXTL"  
/note="ISL3 e-value= 1.2e-45 complete sequence hit  
coverage= 100%, between model( 451 aa) positions 1; 451  
length is 413aa with 44 gaps, 1 stops, absolute frame=  
Minus3"

CDS complement(6335391..6334313)  
/colour="255 0 0"

```

/evidence=predicted
/translation="RIRHLPLFEVPVYLEIRPKRYRCKYCDDhpTTTQHLEWHEPRSP
NTKAYERWLLRILIN-STVSDVARKLGVSEDIVSGIIDRWIAAQVDWSEYADLKVMGM
DEISLKRQ--HR---DFVVLITIPPTdgVDILAVLADRKQQTVANFLOSIP-IDLRQT
IERVCTDMYQGFVSAVREQLPQAKIVIDRFHVTKAYRNCADTVRKREVKRLRRELS--
-----KQEYD-----SIKGAMWPFRRKRPENLKES-EQQLLERLFA--
YSPQLKQAYNLREKLTQIFEGRYTKHGAKcAIRAWCKQVLKSGIKEFDSFLTINNW
DEMTNYFLEG-WTSGFVEGFNRRVKVLKRRCYGIFDIERLRFQRIISLDLNGYQTFVAVX
TL"
/note="ISL3 e-value= 8.8e-52 fragment hit coverage=
86.03%, between model( 451 aa) positions 64; 451 length
is 360aa with 34 gaps, 1 stops, absolute frame= Minus3"
CDS complement(6315477..6314273)
/colour="255 0 0"
/evidence=predicted
/translation="TCSFFLTSXVSAIESGLLKRLSKRLVERALAGELTHHLOQSSND
QS-GDeNSNGPRNSRNGYSKKTQSEQG-EMDLSIPDRCG-EFEPVLVPGQORRIA-
GLDEKIIALYARGMTTRDIRAQLVELYG--ANISEALISDVINSVMEEVKDWRSRPLD
EV--YPIVYLDALYVNIKVNQVSKRAVYVALAVTVEGNKELLGLWIGAAerEGAKFW
LSVLTDLKNRGTQDILIACCDGLKGFPOAIESVYPQTQVQVCIVHLIRNSLRHVPWKE
SRAVAADLKPIYQAATLE-ESEAALDAFAH-KWDETPGISQIWIHWDNVAPLFOYP
MAIRKVIYTTNAIESLNRSLRKVIKTKAVFPNEESVYKLMFLAMRNISKR-WTRPILN
WKAALSHFAILFPTRFNXYIH"
/note="IS256 e-value= 6.6e-165 complete sequence hit
coverage= 100%, between model( 410 aa) positions 1; 410
length is 402aa with 11 gaps, 2 stops, absolute frame=
Minus3"
CDS complement(6315435..6314273)
/colour="255 0 0"
/evidence=predicted
/translation="SGLLKRLSKRLVERALAGELTHHLOQSSNDQS-GDeNSNGPRNS
RNGYSKKTQSEQG-EMDLSIPDRCG-EFEPVLVPGQORRIA-GLDEKIIALYARGM
TTRDIRAQLVELYG--ANISEALISDVINSVMEEVKDWRSRPLDEV--YPIVYLDALY
VNIKVNQVSKRAVYVALAVTVEGNKELLGLWIGAAerEGAKFWLSVLTDLKNRGTQD
ILIACCDGLKGFPOAIESVYPQTQVQVCIVHLIRNSLRHVPWKE SRAVAADLKPIYQA
ATLE-ESEAALDAFAH-KWDETPGISQIWIHWDNVAPLFOYPMAIRKVIYTTNAIE
SLNRSLRKVIKTKAVFPNEESVYKLMFLAMRNISKR-WTRPILN WKAALSHFAILFP
TRFNXYIH"
/note="IS256 e-value= 1.1e-164 fragment hit coverage=
96.59%, between model( 410 aa) positions 15; 410 length
is 388aa with 11 gaps, 1 stops, absolute frame= Minus3"
CDS complement(6239001..6238595)
/colour="255 0 0"
/evidence=predicted
/translation="MLLVRPISTESLRLHRIYHSSRHHQVRQRAHCLILFAQGWPY
TLASLFSVSPKTVYNWLKAWNNRG---FAGLYNH PGRGRKPMFNPDQQQIYEWTT-QA
SPIQ-----LNQVLAQIEQQWSVRVSKATVKRVLKQMDMSWHR"
/note="IS630 e-value= 8.7e-15 fragment hit coverage=
39.63%, between model( 376 aa) positions 1; 149 length is
136aa with 13 gaps, 0 stops, absolute frame= Minus3"
CDS complement(6238941..6238604)
/colour="255 0 0"
/evidence=predicted
/translation="SSRHHQVRQRAHCLILFAQGWPYTLASLFSVSPKTVYNWLKAW
NNRGFAGLYNH---PGRGRKPMFNPDQQQIYEWTTQASPIQLNQVLAQIEQQWSVR--
-VSKATVKRVLKQMDMS"
/note="IS481 e-value= 3.5e-09 fragment hit coverage=
33.62%, between model( 351 aa) positions 1; 118 length is
113aa with 6 gaps, 0 stops, absolute frame= Minus3"
CDS complement(6207357..6205703)

```

/colour="255 0 0"  
/evidence=predicted  
/translation="FQQFLPCQDTLHLDSDWLDSTNHQMT-----FHVSTQAL  
ACCPVCHQTSHRVHSRYERTLRDLPCVEFCLTILLQVCKFFCsnKTCKRRIfterlpQ  
VAVPWARRTVRFAEHLSSIGLALGGAAAARLSYQINYGSSRNT----MLRALFKLPLP  
-SVTPPKILGVDDFALRRG--HEYGTILVDLEKH----QPIVLLTDRKADTLADWLNE  
HP-----GVEVISRDRSKAYKSGASEGAPDALQVADRFHLLQNLLEEILENVF-----  
-----SSHSQ----VIKTVEYTLKATLAEHQDTEAMSQPvvpk  
qvdpnrsrkaqnrarrlekyeqthalkqgylikdiahhlgigkrtvytylaadtfgqy  
kthprrgwsglnpykaylleqwnkgrqnsqllaeiqqqgfgkgsytmvrvytklrqs  
lppqpprdslnelpgrgpvpeaqeliqkpltvqraawlvmrkvenlTEEDETILE-QL  
SSQPELSKAIDLAQSLLFIVR-KRLPQHLDLPWLDRAKN--SALKPFQSFAGLLDDYE  
AVKA-ALTLEVSNGQVEGQNNRLK-----MVKRQMYGRAGLDDLNLKRLV  
L"

/note="ISL3 e-value= 9.2e-10 complete sequence hit  
coverage= 100%, between model( 451 aa) positions 1; 451  
length is 552aa with 73 gaps, 0 stops, absolute frame=  
Minus3"

CDS complement(6206910..6206654)

/colour="255 0 0"  
/evidence=predicted  
/translation="TTPKILGVDDFALRRG--HEYGTILVDLEKH----QPIVLLTDR  
KADTLADWLNEHP-----GVEVISRDRSKAYKSGASEGAPDALQVADRFHLLQ"

/note="ISL3 e-value= 1.5e-21 fragment hit coverage=  
21.73%, between model( 451 aa) positions 156; 253 length  
is 86aa with 12 gaps, 0 stops, absolute frame= Minus3"

CDS complement(6206475..6206177)

/colour="255 0 0"  
/evidence=predicted  
/translation="RLEKYEQTHALRKQGYLIKDIAHHLGIGKRTVYTYLAADTFQY  
KTHPRR-----GWSGLNPYKAYLLEQWNKGRQNSKQ-----LLAEIQOQGFQK  
SYTMVVRYTHKLR"

/note="IS21\_ORF1 e-value= 2.7e-14 fragment hit coverage=  
21.90%, between model( 525 aa) positions 1; 115 length is  
100aa with 15 gaps, 0 stops, absolute frame= Minus3"

CDS complement(6206010..6205742)

/colour="255 0 0"  
/evidence=predicted  
/translation="LEQLSSQPELSKAIDLAQSLLFIVR-KRLPQHLDLPWLDRAKN--  
SALKPFQSFAGLLDDYEAVKA-ALTLEVSNGQVEGQNNRLKMKVQRQMYG"

/note="ISL3 e-value= 1.6e-06 fragment hit coverage=  
20.84%, between model( 451 aa) positions 331; 424 length  
is 90aa with 4 gaps, 0 stops, absolute frame= Minus3"

CDS complement(6205539..6203885)

/colour="255 0 0"  
/evidence=predicted  
/translation="FQQFLPCQDTLHLDSDWLDSTNHQMT-----FHVSTQAL  
ACCPVCHQTSHRVHSRYERTLRDLPCVEFCLTILLQVCKFFCsnKTCKRRIfterlpQ  
VAVPWARRTVRFAEHLSSIGLALGGAAAARLSYQINYGSSRNT----MLRALFKLPLP  
-SVTPPKILGVDDFALRRG--HEYGTILVDLEKH----QPIVLLTDRKADTLADWLNE  
HP-----GVEVISRDRSKAYKSGASEGAPDALQVADRFHLLQNLLEEILENVF-----  
-----SSHSQ----VIKTVEYTLKATLAEHQDTEAMSQPvvpk  
qvdpnrsrkaqnrarrlekyeqthalkqgylikdiahhlgigkrtvytylaadtfgqy  
kthprrgwsglnpykaylleqwnkgrqnsqllaeiqqqgfgkgsytmvrvytklrqs  
lppqpprdslnelpgrgpvpeaqeliqkpltvqraawlvmrkvenlTEEDETILE-QL  
SSQPELSKAIDLAQSLLFIVR-KRLPQHLDLPWLDRAKN--SALKPFQSFAGLLDDYE  
AVKA-ALTLEVSNGQVEGQNNRLK-----MVKRQMYGRAGLDDLNLKRLV  
L"

/note="ISL3 e-value= 9.2e-10 complete sequence hit  
coverage= 100%, between model( 451 aa) positions 1; 451

length is 552aa with 73 gaps, 0 stops, absolute frame= Minus3"

CDS complement(6205092..6204836)  
/colour="255 0 0"  
/evidence=predicted  
/translation="TTPKILGVDDFALRRG--HEYGTILVDLEKH----QPIVLLTDR  
KADTLADWLNEHP-----GVEVISRDRSKAYKSGASEGAPDALQVADRFHLLQ"  
/note="ISL3 e-value= 1.5e-21 fragment hit coverage= 21.73%, between model( 451 aa) positions 156; 253 length is 86aa with 12 gaps, 0 stops, absolute frame= Minus3"

CDS complement(6204657..6204359)  
/colour="255 0 0"  
/evidence=predicted  
/translation="RLEKYEQTHALRKQGYLIKDIAHHLGIGKRTVYTYLAADTFQEY  
KTHPRR-----GWSGLNPKAYLLEQWNKGRQNSKQ-----LLAEIQOQGFKG  
SYTMVVRYTHKLR"  
/note="IS21\_ORF1 e-value= 2.7e-14 fragment hit coverage= 21.90%, between model( 525 aa) positions 1; 115 length is 100aa with 15 gaps, 0 stops, absolute frame= Minus3"

CDS complement(6204192..6203924)  
/colour="255 0 0"  
/evidence=predicted  
/translation="LEQLSSQPELSKAIDLAQSLLFIVR-KRLPQHLDLPWLDRAKN--  
SALKPFQSFAGLLDDYEAVKA-ALTLEVSNGQVEGQNNRLKMKVQRQMYG"  
/note="ISL3 e-value= 1.6e-06 fragment hit coverage= 20.84%, between model( 451 aa) positions 331; 424 length is 90aa with 4 gaps, 0 stops, absolute frame= Minus3"

CDS complement(6061491..6061148)  
/colour="255 0 0"  
/evidence=predicted  
/translation="KYIVTLTPPEERSELIQLTRRRRTLSARKMKRAQIILMLADEGHKDD  
TITQMLNAGISTVHRTRQKFVEGG---VEFALNERPRPGGQKKLDSKAEALLIATACS  
DPPTG----CCRWTMQLLAE"  
/note="IS630 e-value= 1.2e-15 fragment hit coverage= 32.18%, between model( 376 aa) positions 1; 121 length is 115aa with 7 gaps, 0 stops, absolute frame= Minus3"

CDS complement(5745174..5744480)  
/colour="255 0 0"  
/evidence=predicted  
/translation="FKHLHLGMI sDIKRKSLPAIARAVGLENHQSLHHLFSESPWVAS  
hLSDkRLDIILKILDGRRLILLID-----ETGDCKKGKSTDYVKR  
QYIGNVGKKENGIvAVTAYGLFQGMILPLSFEVYKPR-----ErLKEEDEYLSK  
PQIAAGMIRQLQGMGFCFELVLADSLYGEAQTNFVNVLEELKLPYILAIRSNHAVWLP  
AEQAVFAEPWQSFERTFSNGTTETRYrQEIIYGqrhhQKRY"  
/note="IS4 e-value= 4.7e-14 fragment hit coverage= 51.23%, between model( 486 aa) positions 1; 249 length is 232aa with 27 gaps, 0 stops, absolute frame= Minus3"

CDS complement(5745174..5744048)  
/colour="255 0 0"  
/evidence=predicted  
/translation="FKHLHLGMI sDIKRKSLPAIARAVGLENHQSLHHLFSESPWVAS  
hLSDkRLDIILKILDGRRLILLID-----ETGDCKKGKSTDYVKR  
QYIGNVGKKENGIvAVTAYGLFQGMILPLSFEVYKPR-----ErLKEEDEYLSK  
PQIAAGMIRQLQGMGFCFELVLADSLYGEAQTNFVNVLEELKLPYILAIRSNHAVWLP  
AEQAVFAEPWQSFERTFSNGT-----TETRYR  
QEIIYGQRHHQKRYWLLTTDPQTLPENSTS-----YVMAA  
APE----IKLDEIGDCYGFRTWIEYGLKQSKD-TLGWADFRMTHYEQIEKWEIVMSA  
FLMVSLFADVFNDS-----CPVAHQHFAQHPwWDNONG  
WKNLLNNVR--LIIQPLIS----WNLLKRWLEVFPSRALKKGf"  
/note="IS4 e-value= 9.9e-07 complete sequence hit"

coverage= 100%, between model( 486 aa) positions 1; 486 length is 376aa with 117 gaps, 0 stops, absolute frame= Minus3"

CDS complement(5719893..5719670)  
/colour="255 0 0"  
/evidence=predicted  
/translation="SQMSTLTCPNCRSQN-VVKNGRIHNGKQNHKCKTCGRQFV--EA  
PQQKRIDSSTKGLIDKLLLEKIPLAGIARVCDVS"  
/note="IS1\_ORF1 e-value= 3.6e-14 fragment hit coverage= 32.64%, between model( 239 aa) positions 1; 78 length is 75aa with 3 gaps, 0 stops, absolute frame= Minus3"

CDS complement(5522628..5522375)  
/colour="255 0 0"  
/evidence=predicted  
/translation="HIEFSyplMQCPLCGHPK-IYKHGKTSKGSQRXRPCPHCHQTFS-  
DtfdTLYYRRQISPQTIQVILQSHAEGSSFRGLPRITGVAYNT"  
/note="IS1\_ORF1 e-value= 9e-13 fragment hit coverage= 33.89%, between model( 239 aa) positions 1; 81 length is 85aa with 2 gaps, 1 stops, absolute frame= Minus3"

CDS complement(5391534..5391422)  
/colour="255 0 0"  
/evidence=predicted  
/translation="KDYERXTDSTEVMYICMIRLMVRRVAXTLRRWSLFTH"  
/note="IS5\_IS1031 e-value= 2.7e-08 fragment hit coverage= 12.88%, between model( 295 aa) positions 258; 295 length is 38aa with 0 gaps, 2 stops, absolute frame= Minus3"

CDS complement(5338785..5338049)  
/colour="255 0 0"  
/evidence=predicted  
/translation="-----TGVIKRTFkpMLHAWHTYHLSRSN--AGRPPKLCRCQDL  
LVALQYWREYRTYFHIAGDWEVSESTVCRIVHQVETALMNSGLFRLPGQKSLLOQFER  
PDVVVMDVTETPIERPQTRQKAYYSGKKRDIPSNARLSLTATLXrlsaltLVQVVG--  
-----MIFRSSRVQVSISIQIPRVCKIADIKGLQ-----PIMP-TAMFLSRSHNTV  
NXLPCSESITVLXVRNEWALNTLIAAXRFSEFCRSAIAIVVVATRCGVTX"  
/note="IS5\_ISL2 e-value= 3.1e-21 complete sequence hit coverage= 100%, between model( 260 aa) positions 1; 260 length is 246aa with 22 gaps, 5 stops, absolute frame= Minus3"

CDS complement(5338725..5338415)  
/colour="255 0 0"  
/evidence=predicted  
/translation="SRSNAGRPPKLCRCQDLLVALQYWREYRTYFHIAGDWEVSESTV  
CRIVHQVETALMNSGLFRLPGQKSLLOQFERPDVVVMDVTETPIERPQTRQKAYYSGK  
KR"  
/note="IS5\_ISL2 e-value= 9.3e-44 fragment hit coverage= 40%, between model( 260 aa) positions 26; 129 length is 104aa with 0 gaps, 0 stops, absolute frame= Minus3"

CDS complement(5175534..5174819)  
/colour="255 0 0"  
/evidence=predicted  
/translation="YLSPEs-LQCRASSKVVSMXSTVGNPS-----ILARISDL  
FPHCWRLGSLXINRLPYCpGRDRSDELRTLSTLSEISATR-----VRATGCR  
CDGCDXNAHXTSPDKTKSVLF----RKKKRHTFKCQIIANRNTLEIICLVNPGPGRHRD  
FQIFKSGIHIHPDTEsLQDSGYQGIAAYHANSYVPLKKPQHGEsLTSLOREYNRALSQ  
ERMGIEHINRSLKIFRILSERYRNRRRRYALRCNLIAAIYNYEL"  
/note="IS5\_ISL2 e-value= 1.5e-39 complete sequence hit coverage= 100%, between model( 260 aa) positions 1; 260 length is 239aa with 23 gaps, 4 stops, absolute frame= Minus3"

CDS complement(5175219..5174819)

/colour="255 0 0"  
 /evidence=predicted  
 /translation="KKKRHTFKCQIIANRNTLEIICLNVGPGRRHDFQIFKSGSIHIH  
 PDTESLQDSGYQGIAAYHANSYVPLKKPQHGELTSLOREYNRALSQERMGIEHINRSL  
 KIFRILSERYRNRRRRYALRCNLIAAIYNYEL"  
 /note="IS5\_ISL2 e-value= 6.5e-62 fragment hit coverage=  
 51.54%, between model( 260 aa) positions 127; 260 length  
 is 134aa with 0 gaps, 0 stops, absolute frame= Minus3"  
 CDS complement(5122416..5122250)  
 /colour="255 0 0"  
 /evidence=predicted  
 /translation="SRRRAYPNDSMTEWDVLRPLLPPANGFR-----RPRTVNLR  
 EILNAIFYVQRSGYQWEML"  
 /note="IS5\_IS1031 e-value= 1.2e-20 fragment hit coverage=  
 21.36%, between model( 295 aa) positions 15; 77 length is  
 56aa with 7 gaps, 0 stops, absolute frame= Minus3"  
 CDS complement(4461825..4461482)  
 /colour="255 0 0"  
 /evidence=predicted  
 /translation="KYIVTLTPEERSELIQLTRRRTL SARKMKRAQILMLADEGHKDD  
 TITQMLNAGISTVHRTRQKFVEGG---VEFALNERPRPGGQKKLDSKAEALLIATACS  
 DPPTG----CCRWTMQLLAE"  
 /note="IS630 e-value= 1.2e-15 fragment hit coverage=  
 32.18%, between model( 376 aa) positions 1; 121 length is  
 115aa with 7 gaps, 0 stops, absolute frame= Minus3"  
 CDS complement(4252959..4252802)  
 /colour="255 0 0"  
 /evidence=predicted  
 /translation="HHPHPRVQRRMEVLYLKSQGLPHAQICQLCQISRPTLAKTLRLY  
 QGGIEGLK"  
 /note="IS481 e-value= 1.1e-08 fragment hit coverage=  
 15.10%, between model( 351 aa) positions 1; 53 length is  
 53aa with 0 gaps, 0 stops, absolute frame= Minus3"  
 CDS complement(4219197..4219103)  
 /colour="255 0 0"  
 /evidence=predicted  
 /translation="AERG--ITL FELPSYSPHLNLIERLWQFMKYQWI"  
 /note="IS630 e-value= 1.8e-09 fragment hit coverage=  
 9.04%, between model( 376 aa) positions 300; 333 length  
 is 32aa with 2 gaps, 0 stops, absolute frame= Minus3"  
 CDS complement(4134504..4134368)  
 /colour="255 0 0"  
 /evidence=predicted  
 /translation="WQTDGXDGYSRQLPDE---VIHHVSKALTQRLERTNGILWQQTG  
 RWHRR"  
 /note="IS1\_ORF2 e-value= 3.9e-08 fragment hit coverage=  
 20.68%, between model( 237 aa) positions 164; 212 length  
 is 46aa with 3 gaps, 1 stops, absolute frame= Minus3"  
 CDS complement(3873963..3873578)  
 /colour="255 0 0"  
 /evidence=predicted  
 /translation="YADESGMDHRDEYDY-AYGPKGE-----RVYA-LKTG-  
 RRSGRVNMIAALRAKQL--MAPFTIEGACNRTVFELwLERCLIPvIKPGQKLVII--DN  
 ATFHKGGQIQELVEKAG--CEVWYLPPYSPDLNKIERSWSWIKSRIR"  
 /note="IS630 e-value= 1.1e-13 fragment hit coverage=  
 38.83%, between model( 376 aa) positions 188; 333 length  
 is 129aa with 20 gaps, 0 stops, absolute frame= Minus3"  
 CDS complement(3585738..3585497)  
 /colour="255 0 0"  
 /evidence=predicted

```

/translation="VKLAELIPWESFESEYADQFSQ---TMGAPAKPFRVALGTLIIK
EKLGISDAETVEQIRENPYLOYFLGFSEYRESAPFDASML"
/note="IS5_IS5 e-value= 2.6e-06 fragment hit coverage=
19.91%, between model( 422 aa) positions 23; 106 length
is 81aa with 3 gaps, 0 stops, absolute frame= Minus3"
CDS complement(3216468..3216083)
/colour="255 0 0"
/evidence=predicted
/translation="YADESGMDHRDEYDY-AYGPKGE-----RVYA-LKTG-
RRSGRVNMIAALRAKQL--MAPFTIEGACNRTVFELwLERCLIPvLKPGQKLVl--DN
ATFHKGGQIQELVEKAG--CEVWYLPYPSPDLNKIERSWSWIKSRIR"
/note="IS630 e-value= 1.1e-13 fragment hit coverage=
38.83%, between model( 376 aa) positions 188; 333 length
is 129aa with 20 gaps, 0 stops, absolute frame= Minus3"
CDS complement(2709669..2709254)
/colour="255 0 0"
/evidence=predicted
/translation="IERLQTKHP--HQIVYVDEAGIDNRADYPY-GYCPVG-----
---QRFYD-LKSG-KRTERVSFIAALKEGQL--FSPMIFEGSCNRLLEAWLQOSLI
-SQLQLGdVIVIDNASFHHGQRIEEIIVAEAG--CEIWYLPSPDLNKIERWWFVLKN
"
/note="IS630 e-value= 7.3e-15 fragment hit coverage=
42.02%, between model( 376 aa) positions 173; 330 length
is 139aa with 21 gaps, 0 stops, absolute frame= Minus3"
CDS complement(2412987..2412026)
/colour="255 0 0"
/evidence=predicted
/translation="LLRAIISSLyVSCWDWR-TSKFR-----LTVPFDAXXRGLTSN
RXATNLKLGCSRKLRLTLPIIMQHPWMangFVRGSpMKTASSVLXDWXV-----YSQ
WKQASPSSSKPS-----LRRIIAKS-KSSRlywkHYNSMACXSPWMP----YTP
KKT-----L-----QOVVASVN-DYLIAVKRNQGRl
YDHLQTYFeCLKPMAEHTHS-----IQSRGREEHRCIQVYEPVGI---ALQEWEAIRS
VLCVQRWGTRQGKAY----HNTAYYISSAATSPHH---WQSLVREHWGIENRLHWPkd
VVFGEDDYRLEDEQALLNWSVLRTIVINILRLNG--YQSLKTAMTKLANRVDIIIFSLl
TXNSPA"
/note="ISAs1 e-value= 1.9e-08 complete sequence hit
coverage= 100%, between model( 389 aa) positions 1; 389
length is 321aa with 77 gaps, 7 stops, absolute frame=
Minus3"
CDS complement(2412552..2412110)
/colour="255 0 0"
/evidence=predicted
/translation="DYLIAVKRNQGRlYDHLQTYFeCLKPMAEHTHS-----IQSRGR
EEHRCIQVYEPVGI---ALQEWEAIRSVLCVQRWGTRQGKAY----HNTAYYISSAAT
SPHH---WQSLVREHWGIENRLHWPkdVVFGEDDYRLEDEQALLNWSVLRTIVINILR
LNG"
/note="ISAs1 e-value= 2.4e-27 fragment hit coverage=
41.65%, between model( 389 aa) positions 198; 359 length
is 148aa with 15 gaps, 0 stops, absolute frame= Minus3"
CDS complement(2404083..2403389)
/colour="255 0 0"
/evidence=predicted
/translation="FKHLHLGMIIsDIKRKSLPAIARAVGLENHQSLHHFLSESPWVAS
hLSDkRLDIILKILDGRRLILLID-----ETGDCKKKGKSTDYVKR
QYIGNVGKKENGIvAVTAYGLFQGMILPLSFVYKPR-----ErLKEEDEYLSK
PQIAAGMIRQLQGMGFCELVLADSLYGEAQTNFVNVLEELKLPYILAIRSNHAVWLP
AEQAVFAEPWQSFERTFSNGTTETRYrQEIIYGqrhhQKRY"
/note="IS4 e-value= 4.7e-14 fragment hit coverage=
51.23%, between model( 486 aa) positions 1; 249 length is
232aa with 27 gaps, 0 stops, absolute frame= Minus3"

```

CDS complement(2404083..2402957)  
/colour="255 0 0"  
/evidence=predicted  
/translation="FKHLHLGMISDIKRKSLPAIARAVGLENHQSLHHFLSESPWVAS  
hLSDkRLDIILKILDGRRLLILLID-----ETGDCKKKGKSTDYVKR  
QYIGNVGGKENGIVAVTAYGLFQGMILPLSFEVYKPR-----ErLKEEDEYLSK  
PQIAAGMIRQLQGMGFCFELVLADSLYGEOQTNFVNVLEELKLPYILAIRSNHAVWLP  
AEQAVFAEPWQSFERTFSNGT-----TETRYR  
QEIIYGQRHHQKRYWLLTTDPQTLPENSTS-----YVMAA  
APE----IKLDEIGDCYGFRTWIEYGLKQSKD-TLGWADFRMTHYEQIEKWWEIVMSA  
FLMVSLFADVFNDS-----CPVAHQHFAQHPWWDNONG  
WKNLLNNVR--LIIQPLIS----WNLLKRWLEVFPSRALKKGF"  
/note="IS4 e-value= 9.9e-07 complete sequence hit  
coverage= 100%, between model( 486 aa) positions 1; 486  
length is 376aa with 117 gaps, 0 stops, absolute frame=  
Minus3"

CDS complement(2382702..2382314)  
/colour="255 0 0"  
/evidence=predicted  
/translation="FFMDESGFSLVPCIPY-GWQPIG-----TYL-EIPT  
RSSKRLNVLGFLSRRQGL--HAYTSEQTITSEVShCIDTFFADV--ELPTVIVVDQA  
PIHTSQsiyEMKAEWAERG--ITLFELPSYSPHLNLIERLWQFMKYQWI"  
/note="IS630 e-value= 6.5e-11 fragment hit coverage=  
39.10%, between model( 376 aa) positions 187; 333 length  
is 130aa with 21 gaps, 0 stops, absolute frame= Minus3"

CDS complement(2279970..2279714)  
/colour="255 0 0"  
/evidence=predicted  
/translation="SMCEPCCQSQK-IHKRGFDSLqdgTLVQRYQCEDCNRRFK-ERT  
GNPMARLRttslVVSYAIAIKARTKGMGVRATGRFTGTSHTTIMRW"  
/note="IS1\_ORF1 e-value= 8.4e-08 fragment hit coverage=  
33.89%, between model( 239 aa) positions 5; 85 length is  
86aa with 2 gaps, 0 stops, absolute frame= Minus3"

CDS complement(1504611..1503287)  
/colour="255 0 0"  
/evidence=predicted  
/translation="CSDSVTLDF----YQDHPLCVQFSDLDLSSDVGILLAAQAESRI  
HICQDIADCIEEWRDPDKLTHSLPQLVAQRVYQLIGGYEDANDSDSLRHDPIFKIACE  
YLPPIPESnVLASQLTISRLENQVTTDQTAAMRRQFIDRFIA-----SYPHPPSTIVLD  
IDGWDDPTHGDQEGSAFHGYGQHMYFPVLINE----AQSGFPLVCQLRRGNShPGKA  
VAGILRWLFWRLKRAWPGVT-----IVLRADAGFSLPEILRVCERSGIHY  
AIGFSSNAVLKRKISNV-LEQARLOYCRTQOKARL-----FDDVYAAATWDYPRRLV  
MKAEYLPKGANPRFVLTD-MMLSPQQLYDTFYVQRGDSEHpIKELKRGIQADRLSCH  
RFTANQFRLLLA-----QAAYLLMITLRXAAQ-GTELATAQVERLRICALI  
KGAARVRVSVRRVLVELATFCPFEKEIRLIAQRLCDPMP"  
/note="IS1380 e-value= 2.1e-64 complete sequence hit  
coverage= 100%, between model( 487 aa) positions 1; 487  
length is 442aa with 47 gaps, 1 stops, absolute frame=  
Minus3"

CDS complement(1504542..1503287)  
/colour="255 0 0"  
/evidence=predicted  
/translation="LSSDVGILLAAQAESRIHICQDIADCIEEWRDPDKLTHSLPQLV  
AQRVYQLIGGYEDANDSDSLRHDPIFKIACEYLPPIPESnVLASQLTISRLENQVTTDQ  
TAAMRRQFIDRFIA-----SYPHPPSTIVLDIDGWDDPTHGDQEGSAFHGYGQHMYF  
PVLIN-----AQSGFPLVCQLRRGNShPGKAVAGILRWLFWRLKRAWPGVT-----  
-----IVLRADAGFSLPEILRVCERSGIHYAIGFSSNAVLKRKISNV-LEQARLOYC  
RTQOKARL-----FDDVYAAATWDYPRRLVMKAEYLPKGANPRFVLTD-MMLSPQQL  
YDTFYVQRGDSEHpIKELKRGIQADRLSCHRFTANQFRLLLA-----QA  
AYLLMITLRXAAQ-GTELATAQVERLRICALIKGAARVRVSVRRVLVELATFCPFEKEI



RLIAQRLCDPMP"  
 /note="IS1380 e-value= 1.5e-67 fragment hit coverage= 94.46%, between model( 487 aa) positions 28; 487 length is 419aa with 43 gaps, 1 stops, absolute frame= Minus3"  
 CDS complement(691935..690725)  
 /colour="255 0 0"  
 /evidence=predicted  
 /translation="DELIGENPQPEdiLGESGLLKRLSKRLVERALAGELTHHLQOSS NDQS-GDeNSNGPRNSRNGYSKKTQVQSEQG-EMDLSIPDRCG-EFEPVLVPGQORRI A-GLDEKIIALYARGMTTRDIRAQLVELYG--ANISEALISDVINSVMEEVKDWRSRP LDEV--YPIVYLDALYVNIKVNGQVSKRAVYVALAVTVEGNKELLGLWIGAAerEGAK FWLSVLTDLKNRGTQDILIAACDGLKGFPOAIESVYPQTVQVQVCIVHLIRNSLRHVPW KESRAVAADLKPIYQAATLE-ESEAALDAFAH-KWDETYPGISQIWIRHWDNVAPLFO YPMAIRKVIYTTNAIESLNRSLRKVIKTKAVFPNEESVYKLMFLAMRNISKR-WTRPI LNWKAAALSHFAILFPTRFNXYIH"  
 /note="IS256 e-value= 3.8e-165 complete sequence hit coverage= 100%, between model( 410 aa) positions 1; 410 length is 404aa with 11 gaps, 1 stops, absolute frame= Minus3"  
 CDS complement(691935..690725)  
 /colour="255 0 0"  
 /evidence=predicted  
 /translation="DELIGENPQPEdiLGESGLLKRLSKRLVERALAGELTHHLQOSS NDQS-GDeNSNGPRNSRNGYSKKTQVQSEQG-EMDLSIPDRCG-EFEPVLVPGQORRI A-GLDEKIIALYARGMTTRDIRAQLVELYG--ANISEALISDVINSVMEEVKDWRSRP LDEV--YPIVYLDALYVNIKVNGQVSKRAVYVALAVTVEGNKELLGLWIGAAerEGAK FWLSVLTDLKNRGTQDILIAACDGLKGFPOAIESVYPQTVQVQVCIVHLIRNSLRHVPW KESRAVAADLKPIYQAATLE-ESEAALDAFAH-KWDETYPGISQIWIRHWDNVAPLFO YPMAIRKVIYTTNAIESLNRSLRKVIKTKAVFPNEESVYKLMFLAMRNISKR-WTRPI LNWKAAALSHFAILFPTRFNXYIH"  
 /note="IS256 e-value= 9.9e-166 complete sequence hit coverage= 100%, between model( 410 aa) positions 1; 410 length is 404aa with 11 gaps, 1 stops, absolute frame= Minus3"  
 CDS complement(558171..557924)  
 /colour="255 0 0"  
 /evidence=predicted  
 /translation="MQCPLCGHPK-THKHGKTSKGSQRYRCPHCHQTFSS--ETFDTLH YRQISSEtiqtILQSHAEGSSLRGLSRITGVAYNTCVSVIR"  
 /note="IS1\_ORF1 e-value= 2.1e-12 fragment hit coverage= 34.31%, between model( 239 aa) positions 6; 87 length is 83aa with 3 gaps, 0 stops, absolute frame= Minus3"  
 CDS complement(483540..483299)  
 /colour="255 0 0"  
 /evidence=predicted  
 /translation="VKLAELIPWESFESEYADQFSQ---TMGAPAKPFRVALGTLIIK EKLGISDAETVEQIRENPYLOQYFLGFSEYRESAPFDASML"  
 /note="IS5\_IS5 e-value= 2.6e-06 fragment hit coverage= 19.91%, between model( 422 aa) positions 23; 106 length is 81aa with 3 gaps, 0 stops, absolute frame= Minus3"  
 CDS complement(477669..477176)  
 /colour="255 0 0"  
 /evidence=predicted  
 /translation="LEKTGIESKKKTYGYR--ERD--ETQR---QAFIERLQTKHP-- HQIVYVDEAGIDNRADYPY-GYCPVG-----QRFYD-LKSG-KRTERVSFIA ALKEGQL--FSPMTFEGSCNRLLEAWLQOSLI-SQLQLgdVIVIDNASFHHGQRIIE IVAEAG--CEIWYLPSPDLNKIERWWFVLKN"  
 /note="IS630 e-value= 3e-16 fragment hit coverage= 50.80%, between model( 376 aa) positions 140; 330 length is 165aa with 28 gaps, 0 stops, absolute frame= Minus3"

CDS complement(474207..474032)  
/colour="255 0 0"  
/evidence=predicted  
/translation="GXHPiAQiCQVLNYPRSQVYYHARGQP-----DESELKAAIAGV  
AGAYP-TYGYRRITAQLQ---RQG"  
/note="IS3\_IS150\_ORF2 e-value= 2.1e-06 fragment hit  
coverage= 17.48%, between model( 389 aa) positions 103;  
170 length is 59aa with 9 gaps, 1 stops, absolute frame=  
Minus3"

CDS complement(474183..474032)  
/colour="255 0 0"  
/evidence=predicted  
/translation="CQVLNYPRSQVYYHARGQPDESELKAAIAGVAGAYPTYGYRRIT  
AQLQRQG"  
/note="IS3\_IS407\_ORF2 e-value= 1.2e-07 fragment hit  
coverage= 14.83%, between model( 344 aa) positions 85;  
135 length is 51aa with 0 gaps, 0 stops, absolute frame=  
Minus3"

CDS complement(474147..474035)  
/colour="255 0 0"  
/evidence=predicted  
/translation="YHARGQPDESELKAAIAGVAGAYPTYGYRRITAQLQRQ"  
/note="IS3\_IS2\_ORF2 e-value= 9.4e-07 fragment hit  
coverage= 12.25%, between model( 302 aa) positions 48; 84  
length is 38aa with 0 gaps, 0 stops, absolute frame=  
Minus3"

CDS complement(472965..471914)  
/colour="255 0 0"  
/evidence=predicted  
/translation="MSPLMMKTSVFE-----GLGLGTQPRTTISHEERLVLSGNlSN  
XISVKFGTMDTTIMQGXiGtrpLTTEdRMLRQTHKXTQARTHQYRIhXKXRVFTGAK  
-----AAIQSLAELTQMVE-----NHKG--NECDDSLTLKQSVYFI-----  
-DCFSRLLXSKLK-----GYCVNHKRVARLMRQIGIMAKTKVK--RKRTTNSEHSfpRY  
GNRVLNLS--IDHPEQVWVADITYIRLQ--QEFVYLAVVMDVFTRAIRGWHLsrHIDQq  
LTLRALNKALERAT---PEIHHS-----DQGVQYAAAAYMQLLQHQVQISMAEVGQA  
WQNGYAERLMRTIKEEEVD--LSDYRNfTEAYEHIEQFLEDVYMHKRIHSSLGYLTPC  
EYEQQWRQO"  
/note="IS3\_IS150\_ORF2 e-value= 4.3e-13 complete sequence  
hit coverage= 100%, between model( 389 aa) positions 1;  
389 length is 351aa with 50 gaps, 5 stops, absolute  
frame= Minus3"

CDS complement(472827..471917)  
/colour="255 0 0"  
/evidence=predicted  
/translation="MDTTIMQGXiGTRpLTTEdRMLRQTHKXTQARTHQYRIHXLKXR  
VFTGAKAAIQSLAELTQMVENhkgneCDDSLTLKQSVYFIDCFsRLLXSKlkGYCVNH  
KRVARLMRQIGIMAKTKVK---RKRTTNSEHSF-PRYGNRVLNLSIDHPEQVWVADI  
TYIRL--QEFVYLAVVMDVFTRAIRGWHLsrHIDQqLTLRALNKALER---ATPEI  
HSDQGVQYAAAAYMQLLQHQVQISMAEVGQAWQNGYAERLMRTIKEEEVDLSDYRN  
FT--EAYEHIEQFLEDVYMHKRIHSSLGYLTPCEYEQQWRQO"  
/note="IS3\_IS150\_ORF1 e-value= 6.7e-29 complete sequence  
hit coverage= 100%, between model( 306 aa) positions 1;  
306 length is 304aa with 13 gaps, 5 stops, absolute  
frame= Minus3"

CDS complement(472827..471890)  
/colour="255 0 0"  
/evidence=predicted  
/translation="MDTTIMQGXl-----GTRPLTTEdRMLRQTHKXT---  
QARTHQYRIHXLKXRVFTGAKA--AIQSLAELTQMVE-----NHKGNEC  
DDSLTLKQSVYFI-----DCF-SRLLXSKL--KGYCVNHKRVARLMRQIGIMAKTKV-K

RKRTtensehsfprYGNRVLNLSIDHPEQVWVADITYIRLQ--QEFVYLAVVmDVFTRA  
 IRGWHLSRHIDQQLTLRALNKALE-RATPEIHHSDOGVOYAAAAAYMQLLQHQVQISM  
 AEVGQAWQNGYAERLMRTIKEEEVDLSDYRNFTEAYEHIEQFLEDVYMHKRIHSSSLGY  
 LTPCEYEQQWRQNNHYCMNK"  
 /note="IS3\_IS407\_ORF2 e-value= 9.2e-07 complete sequence  
 hit coverage= 100%, between model( 344 aa) positions 1;  
 344 length is 313aa with 42 gaps, 5 stops, absolute  
 frame= Minus3"  
 CDS complement(472785..471890)  
 /colour="255 0 0"  
 /evidence=predicted  
 /translation="LTTEDRmLRQTH-----KXTQARTHQYRIHXLKXRVFTGAKAA  
 IQSLAELTQMVEN-HKGNECddsltlkqsVYFIDCFsRLLXSkLKGyCVNHKRVARLM  
 RQIGIMAKTKVkrkrtTnSEHSFPRYGNRVL-NLSIDHPEQVWVADITYIRLQOEFVY  
 LAVVMDVFTRAIRGWHLsrHIDQQLT-LRALNKALERATPE-----IHHSDOGVOY  
 AAAAYMQLLQHQVQISMAEVGQAWQNGYAERLMRTIKEEEVDL---S-DYRNFTEAY  
 EHIEQFLEDVYMHKRIHSSSLGYLTPCEYEQQWRQNNHYCMNK"  
 /note="IS3\_IS51\_ORF1 e-value= 2.6e-25 complete sequence  
 hit coverage= 100%, between model( 307 aa) positions 1;  
 307 length is 299aa with 20 gaps, 4 stops, absolute  
 frame= Minus3"  
 CDS complement(472752..471881)  
 /colour="255 0 0"  
 /evidence=predicted  
 /translation="HKXTQARTH-QYRIHXLKX-----RVFTGA---KAAIQSLAEL  
 TQmVENHKGNECDDSL-----TLKQS-----VYFIDCFsRLLXsKLKGyCVNHKRVAR  
 LMRQIGIMAKTKVkrkrtTnSEHSFPRYGNRVL-NLSIDHPEQVWVADITYIRLQOEF  
 VYLAVVMDVFTRAIRGWHLsrHIDQQLTLRALNKALERATPE-----IHHSDOGVOY  
 QYAAAAAYMQLLQHQVQISMAEVGQAWQNGYAERLMRTIKEEEVDLSDYrnFTEAYEH  
 IEQFLEDV--YMHKRIHSSSLGYLTPCEYEQQWRQNNHYCMNKEDS"  
 /note="IS3\_IS51\_ORF2 e-value= 1.6e-14 complete sequence  
 hit coverage= 100%, between model( 317 aa) positions 1;  
 317 length is 291aa with 31 gaps, 3 stops, absolute  
 frame= Minus3"  
 CDS complement(472737..471908)  
 /colour="255 0 0"  
 /evidence=predicted  
 /translation="ARTHQYRIHXLkXRVFT---GAKAAIQSLAELTQMVENHKGNE  
 CDDSLTLKQSVYFIDCFsRLLXSkLKGyCVNHKRVARLMRQIGIMAKTKVkrkrtTnS  
 EHSFPRY---GNRVLNLSIDHPEQVWVADITYIRLQOEFVYLAVVMDVFTRAIRGWHL  
 SRHIDQQLTLRALNKALER----ATPE---IHHSDOGVOYAAAAAYMQLLQHQVQISM  
 AEVGQAWQNGYAERLMRTIKEEEVDLSDYRNFTEAYEHIEQFLEDVYMHKRIHSSSLGY  
 LTPCEYEQQWRQNN"  
 /note="IS3\_IS3\_ORF2 e-value= 7.9e-44 complete sequence  
 hit coverage= 100%, between model( 288 aa) positions 1;  
 288 length is 277aa with 14 gaps, 3 stops, absolute  
 frame= Minus3"  
 CDS complement(472722..471920)  
 /colour="255 0 0"  
 /evidence=predicted  
 /translation="YRIHXLKXRVFTGAKAAIQSLAELT--QMVEN--HKG--NECDD  
 SLTLKQSVYFID-----CFSRLLXSKL--KGyCVNHKRVARLMRQIGIMAKTKVkrkR  
 TnSEHSfPRYGNRVLNLS-IDHPEQVWVADITYIRLQOEFVYLAVVMDVFTRAIRGW  
 HLSRHIDQQLTLRALNKALERA-TPE--IHHSDOGVOYAAAAAYMQLLQHQVQISMAE  
 VGQAWQNGYAERLMRTIK-EEVDL-SDYRNFTEAYEHIEQFLEDVYMHKRIHSSSLGY  
 LTPCEYEQQWR"  
 /note="IS3\_IS3\_ORF1 e-value= 1.8e-35 complete sequence  
 hit coverage= 100%, between model( 286 aa) positions 1;  
 286 length is 268aa with 19 gaps, 3 stops, absolute  
 frame= Minus3"

CDS complement(472551..471914)  
/colour="255 0 0"  
/evidence=predicted  
/translation="SKLKGVCVNHKRVARLMRQIGIMAKTKVK-RKRTTNSEHSfprY  
GNRVLNLS--IDHPEQVWVADITYIRLQ-QEFVYLAVVMDVFTRAIRGWHLRHRIDQO  
LTLRALNKALERAT---PEIHHS-----DQGVQYAAAAYMQLLQOHQVQISMAEVGQA  
WONGYAERLMRTIKEEEVD--LSDYRNFTEAYEHIEQFLEDVYMHKRIHSSLGYLTPC  
EYEQQWRQ"  
/note="IS3\_IS150\_ORF2 e-value= 3.3e-35 fragment hit  
coverage= 57.58%, between model( 389 aa) positions 166;  
389 length is 213aa with 14 gaps, 0 stops, absolute  
frame= Minus3"

CDS complement(472548..471917)  
/colour="255 0 0"  
/evidence=predicted  
/translation="KLKGVCVNHKRVARLMRQIGIMAKTKVK----RKRTTNSEHSF-  
PRYGNRvlnLSIDHPEQVWVADITYIRL--QEFVYLAVVMDVFTRAIRGWHLRHRID  
QQLTLRALNKALER----ATPEIHHS DQGVQYAAAAYMQLLQOHQVQISMAEVGQAWQ  
NGYAERLMRTIKEEEVDLSDYRNFTEAYEHIEQFLEDVYMHKRIHSSLGYLTPCEY  
EQWRQ"  
/note="IS3\_IS150\_ORF1 e-value= 2.3e-40 fragment hit  
coverage= 72.55%, between model( 306 aa) positions 85;  
306 length is 211aa with 13 gaps, 0 stops, absolute  
frame= Minus3"

CDS complement(472548..471920)  
/colour="255 0 0"  
/evidence=predicted  
/translation="K-LKGVCVNHKRVARLMRQIGIMAKTKVKRKRTTNSEHSfPRYG  
NRVLNLS-IDHPEQVWVADITYIRLQQEFVYLAVVMDVFTRAIRGWHLRHRIDQQLTL  
RALNKALERA-TPE--IHHS DQGVQYAAAAYMQLLQOHQVQISMAEVGQAWQNGYAER  
LMRTIK-EEVDL-SDYRNFTEAYEHIEQFLEDVYMHKRIHSSLGYLTPCEYEQQWR"  
/note="IS3\_IS3\_ORF1 e-value= 2.3e-45 fragment hit  
coverage= 75.52%, between model( 286 aa) positions 71;  
286 length is 210aa with 7 gaps, 0 stops, absolute frame=  
Minus3"

CDS complement(472539..471908)  
/colour="255 0 0"  
/evidence=predicted  
/translation="GYCVNHKRVARLMRQIGIMAKTKVKRKRTTNSEHSFPRY---GN  
RVLNLSIDHPEQVWVADITYIRLQQEFVYLAVVMDVFTRAIRGWHLRHRIDQQLTLR  
LNKALER----ATPE---IHHS DQGVQYAAAAYMQLLQOHQVQISMAEVGQAWQNGYA  
ERLMRTIKEEEVDLSDYRNFTEAYEHIEQFLEDVYMHKRIHSSLGYLTPCEYEQQWRQ  
QNN"  
/note="IS3\_IS3\_ORF2 e-value= 7.7e-58 fragment hit  
coverage= 76.74%, between model( 288 aa) positions 68;  
288 length is 211aa with 10 gaps, 0 stops, absolute  
frame= Minus3"

CDS complement(472530..471890)  
/colour="255 0 0"  
/evidence=predicted  
/translation="VNHKRVARLMRQIGIMAKTKVKRKRTTNSEHSFPRYGNRVL-NL  
SIDHPEQVWVADITYIRLQQEFVYLAVVMDVFTRAIRGWHLRHRIDQQLT-LRALNKA  
LERATPE-----IHHS DQGVQYAAAAYMQLLQOHQVQISMAEVGQAWQNGYAERLM  
RTIKEEEVDL---S-DYRNFTEAYEHIEQFLEDVYMHKRIHSSLGYLTPCEYEQQWRQ  
QNNHYCMNK"  
/note="IS3\_IS51\_ORF1 e-value= 9.6e-44 fragment hit  
coverage= 73.94%, between model( 307 aa) positions 81;  
307 length is 214aa with 13 gaps, 0 stops, absolute  
frame= Minus3"

CDS complement(472518..471905)

```

/colour="255 0 0"
/evidence=predicted
/translation="RVARLMRQIGIMAKTKVVKRRTTNSHSPFRYGNRVL-NLSIDH
PEQVWVADITYIRLQOEFVYLAVVMDVFTRAIRGWHLRSRHHIDQQLTLRALNKALERAT
PE-----IHHSDDQGVQYAAAAYMQLLQHQVQISMAEVEGQAWQNGYAERLMRTIK
EEEVDLSDYrnFTEAYEHIEQFLEDV--YMHKRIHSSLGYLTPCEYEQQWRQONNH"
/note="IS3_IS51_ORF2 e-value= 1.8e-35 fragment hit
coverage= 67.51%, between model( 317 aa) positions 96;
309 length is 205aa with 11 gaps, 0 stops, absolute
frame= Minus3"
CDS complement(470568..470162)
/colour="255 0 0"
/evidence=predicted
/translation="MSLVRPISTESLRLHRIYHSSRHHQVRQRAHCLILFAQGWPY
TLASLFSVSPKTVYNWLKAWNNRG---FAGLYNHPPGRGRKPMFNPDQQQIYEW-TQA
SPIQ-----LNQVLAQIEQQWSVRVSKATVKRVLKQMDMSWHR"
/note="IS630 e-value= 3.4e-15 fragment hit coverage=
39.63%, between model( 376 aa) positions 1; 149 length is
136aa with 13 gaps, 0 stops, absolute frame= Minus3"
CDS complement(470508..470171)
/colour="255 0 0"
/evidence=predicted
/translation="SSRHHQVRQRAHCLILFAQGWPYTLASLFSVSPKTVYNWLKAW
NNRGFAGLYNH---PGRGRKPMfNPDQQQIYEWTOASPIQLNQVLAQIEQQWSVR--
-VSKATVKRVLKQMDMS"
/note="IS481 e-value= 3.5e-09 fragment hit coverage=
33.62%, between model( 351 aa) positions 1; 118 length is
113aa with 6 gaps, 0 stops, absolute frame= Minus3"
CDS complement(260016..259754)
/colour="255 0 0"
/evidence=predicted
/translation="LFYFLMQCPLCGHPK-THKHGKTSKGSQRYRCPHCQQTFS-Etf
DTLCYRRQISPETIQITILQAHVEGSSLRGLSRITGVAYNTCVSVVR"
/note="IS1_ORF1 e-value= 1.7e-15 fragment hit coverage=
36.40%, between model( 239 aa) positions 1; 87 length is
88aa with 2 gaps, 0 stops, absolute frame= Minus3"
CDS complement(260016..259316)
/colour="255 0 0"
/evidence=predicted
/translation="LFYFLMQCPLCGHPK-THKHGKTSKGSQRYRCPHCQQTFS-Etf
DTLCYRRQISPETIQITILQAHVEGSSLRGLSRITGVAYNTCVSVVRS---SHKSQMI
HNGEVQAVAT---DVINADELWSFVKkskstVSRRSXGXATAGXHXVLRKRVVSCSVA
VLADIPTSLKnxLKILRAKPPVIIGK-----RMVKGTH-----DNYPMRSS
MKXVKPXPNAxsgpmascVSRPGVGIDDRINLA-KSGNRV"
/note="IS1_ORF1 e-value= 2.6e-07 complete sequence hit
coverage= 100%, between model( 239 aa) positions 1; 239
length is 234aa with 24 gaps, 7 stops, absolute frame=
Minus3"
CDS complement(220944..220250)
/colour="255 0 0"
/evidence=predicted
/translation="FKHLHLGMIIsDIKRKSLPAIARAVGLENHQSLHHFLSESPWVAS
hLSDkRLDIILKILDGRRLILLID-----ETGDCKKKGKSTDYVVKR
QYIGNVGKKENGIvAVTAYGLFQGMILPLSFVYKPR-----ErLKEEDEYLSK
PQIAAGMIRQLQGMGFCFELVLADSLYGEAQTNFVNVLEELKLPYILAIRSNHAVWLP
AEQAVFAEPWQSFERTFSNGTTETRYrQEIIYGqrhhQKRY"
/note="IS4 e-value= 4.7e-14 fragment hit coverage=
51.23%, between model( 486 aa) positions 1; 249 length is
232aa with 27 gaps, 0 stops, absolute frame= Minus3"
CDS complement(220944..219818)

```

```
/colour="255 0 0"
/evidence=predicted
/translation="FKHLHLGMIsDIKRKSLPAIARAVGLENHQSLHHFLSESPWVAS
hLSDkRLDIILKILDGRRLLILLID-----ETGDCKKGGKSTDYVKKR
QYIGNVGGKENGIVAVTAYGLFQGMILPLSFvEVYKPR-----ErLKEEDEYLSK
PQIAAGMIRQLQGMGFCFELVLADSLYGvEAOQTNFVNVLEELKLPYILAIRSNHAVWLP
AEQAVFAEPWQSFERTFSNGT-----TETRYR
QEIIYGQRHHQKRyWLLTTDPQTLPENSTS-----YVMAA
APE----IKLDEIGDCYGFRTWIEYGLKQSKD-TLGWADFRMTHYEQIEKWWEIVMSA
FLMVSLFADVFNDS-----CPVAHQHFAQHPwWDNQNG
WKNLLNNVR--LIIQPLIS----WNLLKRWLEVFPSRALKKGF"
/note="IS4 e-value= 9.9e-07 complete sequence hit
coverage= 100%, between model( 486 aa) positions 1; 486
length is 376aa with 117 gaps, 0 stops, absolute frame=
Minus3"
complement(127077..126635)
/colour="255 0 0"
/evidence=predicted
/translation="DYLIAVKRNQGRLYDHLQTYFeCLKPMeAETHS-----IQSRGR
EEHRCIQVYEPVGI---ALQEWeEAIRSVLCVQRWGTRQGKAY----HNTAYYISSAAT
SPHH---WQSLVREHWGIENRLHWPkKDVVFGEDDYRLEDEQALLNWSVLRTIVINILR
LNG"
/note="ISAs1 e-value= 2.4e-27 fragment hit coverage=
41.65%, between model( 389 aa) positions 198; 359 length
is 148aa with 15 gaps, 0 stops, absolute frame= Minus3"
```

CDS

//
