# Supplementary material for: TnpPred: A Web Service for the Robust Prediction of Prokaryotic Transposases
Source: Hindawi journal article supplement (doi:10.1155/2012/678761), 2012-01-01
Supplement: f3 [file 678761.f3.pdf]

**Supplementary file 3**

*Stenotrophomonas maltophilia* K279a TnpPred annotation in genbank format (.gbk)

```
LOCUS      NC_010943                0 bp    DNA    linear    UNK
ACCESSION  unknown
COMMENT    This looks like a good IS fragment prediction
FEATURES   Location/Qualifiers
   source   1..4851126
            /db_xref="taxon:522373"
            /mol_type="genomic DNA"
            /organism="Stenotrophomonas maltophilia K279a"
   CDS      385588..385701
            /colour="255 0 0"
            /evidence=predicted
            /translation="MRSPLSTRERAVLQWVLRG-CSTGEMARRSGRAASTIS"
            /note="IS30 e-value= 5.7e-06 fragment hit coverage=
11.05%, length is 38aa with 1 gaps, 0 stops, frame=
Plus1"
   CDS      478387..479325
            /colour="255 0 0"
            /evidence=predicted
            /translation="FGIGIDVSKATLDVAVHGEQ-----FRQFSNDKRGFVRLIRWL
KTPW-----IKQVVLEASGGYERAALDVLHAA---GLPMVRINPARARRFAQGT-GRA
AKTDRLDATVLAQMAHLLPLTRYVP--PAPW---QORLAEFAQCRRQLVQMRVSEMQR
LRRLVDPDLIA-----
-----MKQRHIAQLSDDLKQLDKAIAEQLEGQPGW
KNIGA-----LKGVGPILISTLACELP-ELGSLGSK-AIASLVGLAPMNRESG-TWQ
GQRRISG-GRAVVREALYMAALTAIRYEPRLRAFYAGLKAKGK---ASKVALVAVMRK
MLVILNARKrdaeVALGCPXQDSCYWGYP"
            /note="IS110 e-value= 1.6e-50 complete sequence hit
coverage= 100%, length is 313aa with 108 gaps, 1 stops,
frame= Plus1"
   CDS      478387..479262
            /colour="255 0 0"
            /evidence=predicted
            /translation="FGIGIDVSKATLDVAVHGEQ-----FRQFSNDKRGFVRLIRWL
KTPW-----IKQVVLEASGGYERAALDVLHAA---GLPMVRINPARARRFAQGT-GRA
AKTDRLDATVLAQMAHLLPLTRYVP--PAPW---QORLAEFAQCRRQLVQMRVSEMQR
LRRLVDPDLIA-----
-----MKQRHIAQLSDDLKQLDKAIAEQLEGQPGW
KNIGA-----LKGVGPILISTLACELP-ELGSLGSK-AIASLVGLAPMNRESG-TWQ
GQRRISG-GRAVVREALYMAALTAIRYEPRLRAFYAGLKAKGK---ASKVALVAVMRK
MLVILNAR"
            /note="IS110 e-value= 1.4e-51 fragment hit coverage=
96.15%, length is 292aa with 108 gaps, 0 stops, frame=
Plus1"
   CDS      572224..573165
            /colour="255 0 0"
            /evidence=predicted
            /translation="NARLTVHSRALLIRRILHEGLRPEEAAQACGVSVRTAYKWLARF
RQFGAPGLENRSSRPHTPHATPAPVIEQIKEHR-RKRQTYLTISKALG-----
VGHSTISRLMRAHGLNRLCRLEPPK-----EVIR-----YEYDQPGGLLHLDIKK
-----LGNFQRPGRHTDAkRRGNAAGGGWGYVHVAIDDHSRVAFSSVHPNEQAETACQ
ALLGALQYYASLGIT-FKRILTDNGACYRST----AFAKLLKSLGIKHIRTKPYTPRT
NGKAERFIQTSLEWAYARE---YASSDQRNSVLTQWLHHYNWHRPHM--GIGGQPPI
SRVLLNNVVGLHSXSTIA"
            /note="IS481 e-value= 5e-95 complete sequence hit
coverage= 100%, length is 314aa with 38 gaps, 1 stops,
frame= Plus1"
```

CDS 572224..573165  
/colour="255 0 0"  
/evidence=predicted  
/translation="NARLTVHSRALLIRRILHEGLRPEEAAQACGVSVRTAYKWLARF  
RQFGAPGLENRSSRPHQTPHATPAPVIEQIKEHR-RKRQTYLTISKALG-----  
VGHSTISRLMRAHGLNRLCRLEPPK-----EVIR-----YEYDQPGGLLHLDIKK  
-----LGNFQRPGHRTDAkRRGNAAGGGWGYVHVAIDDHRSRVAFSSVHPNEQAETACQ  
ALLGALQYYASLGIT-FKRILTDNGACYRST----AFAKLLKSLGIKHIRTkPYTPRT  
NGKAERFIQTSLEWAYARE---YASSDQRNSVLTQWLHHYNWHRPHM--GIGGQPPI  
SRVLLNNVVLHXSXTIA"  
/note="IS481 e-value= 1.3e-95 complete sequence hit  
coverage= 100%, length is 314aa with 38 gaps, 1 stops,  
frame= Plus1"

CDS 572845..573111  
/colour="255 0 0"  
/evidence=predicted  
/translation="RILTDNGACYRSTAFAKLLKSLGIKHIRTkPYTPRTNGKAERFI  
QTSLEWAY--AREYASSDQRNSVLTQWLHHYNWHRPHMGIGGQPPI"  
/note="IS3\_IS150\_ORF2 e-value= 1.8e-10 fragment hit  
coverage= 23.39%, length is 89aa with 2 gaps, 0 stops,  
frame= Plus1"

CDS 573040..573108  
/colour="255 0 0"  
/evidence=predicted  
/translation="VLTQWLHHYNWHRPHMGIGGQPP"  
/note="IS3\_IS407\_ORF2 e-value= 4.1e-07 fragment hit  
coverage= 6.69%, length is 23aa with 0 gaps, 0 stops,  
frame= Plus1"

CDS 850483..851532  
/colour="255 0 0"  
/evidence=predicted  
/translation="-----SRRCPS-----VGTASAAAPKAD---EKDPFVQAAXGN  
EPRXAAQGS-----RLSACGD---RLPKKTRCLDPG-----RAGGARRKAQAIQGLR  
QVHTLSLLLEAAELSRSTFYQNHVL--AHPDqDEAALCERIRAIYDQSQGRYGYRTV  
TLELA---NQGHRTNHKRVQRLMGEMGLKSRVRVK-RYRSFKGAANVVVGNLNRQFH  
AERPNOQKWVTDVTEFKVQ-GMKLYLSPIMDLNGEIVAYQIKRQPVFDLVGQMLEEAI  
MKLSPDERPMIHS-----DQGWQYQHENYRHMLEKHSLKQSMSRRGNCLDNAAMESFF  
GTLKSEFFY--LNSFDSIESLEAGLVEYIQYYNQERIKLKLKGLSPVEYreRAQSAAX  
"  
/note="IS3\_IS150\_ORF2 e-value= 5e-121 complete sequence  
hit coverage= 100%, length is 350aa with 42 gaps, 3  
stops, frame= Plus1"

CDS 850624..851523  
/colour="255 0 0"  
/evidence=predicted  
/translation="LPKKTRCLDPGRAGgARRKAQAIQGLRQVHTLSLLLEAAELSR  
TFYQNHVLAHPDqDEAALCERIRAIYDQSQGRYGYRTVTLELANQGHRTNHKRVQRL  
MGEMGLKSRVRVK---RYRSFKGAANVVVGNLNRQFHAERPNOQKWVTDVTEFKV--Q  
GMKLYLSPIMDLNGEIVAYQIKRQPVFDLVGQMLEEAIMK-LSPDERPMIHSQGWQ  
YQHENYRHMLEKHSLKQSMSRRGNCLDNAAMESFFGTLKSEFFYLNSFDSIE--SLEA  
GLVEYIQYYNQE-RIKLLKGLSPVEYRERAQS"  
/note="IS3\_IS150\_ORF1 e-value= 1.2e-86 complete sequence  
hit coverage= 100%, length is 300aa with 9 gaps, 0 stops,  
frame= Plus1"

CDS 850624..851523  
/colour="255 0 0"  
/evidence=predicted  
/translation="LPKKTRCLDPGRAGgARRKAQAIQGLRQVHTLSLLLEAAELSR  
TFYQNHVLAHPDqDEAALCERIRAIYDQSQGRYGYRTVTLELANQGHRTNHKRVQRL  
MGEMGLKSRVRVK---RYRSFKGAANVVVGNLNRQFHAERPNOQKWVTDVTEFKV--Q

GMKLYLSPIMDLYNGEIVAYQIKRQPVFDLVGQMLEEAIMK-LSPDERPMIHSQGWQ  
 YQHENYRHMLEKHSKQSMSRRGNCLDNAAMESFFGTLKSEFFYLNSFDSIE--SLEA  
 GLVEYIQYYNQE-RIKLLKGLSPVEYRERAQS"  
 /note="IS3\_IS150\_ORF1 e-value= 3.2e-87 complete sequence  
 hit coverage= 100%, length is 300aa with 9 gaps, 0 stops,  
 frame= Plus1"  
 CDS 850672..851532  
 /colour="255 0 0"  
 /evidence=predicted  
 /translation="RRKAQAIQGLRQVHTLSLLLEAAELSRSTFFYYQNHVL--AHPDq  
 DEAAALCERIRAIYDQSQGRYGYRTVTLELA---NQGHRTNHKRVQRLMGEMGLKSRVR  
 VK-RYRSFKGAANVVVGNLNRQFHAERPNOQKVVTDVTEFKVQ-GMKLYLSPIMDLYN  
 GEIVAYQIKRQPVFDLVGQMLEEAIMKLSPPERPMIHS-----DQGWQYQHENYRHM  
 LEKHSKQSMSRRGNCLDNAAMESFFGTLKSEFFY--LNSFDSIESLEAGLVEYIQYYN  
 QERIKLLKGLSPVEYrERAQSAAX"  
 /note="IS3\_IS150\_ORF2 e-value= 1.9e-151 fragment hit  
 coverage= 76.61%, length is 287aa with 14 gaps, 1 stops,  
 frame= Plus1"  
 CDS 850681..851553  
 /colour="255 0 0"  
 /evidence=predicted  
 /translation="AQAIQGLRQVHTLSLLLEAAELSRSTFFYYQNHVLAHPD-----  
 QDEAAALCERIRAIYDQSQGRYGYRTVTLELANQGHRTNHKRVQRLMGEMGLKSRVRVK  
 RYRSFKGAANVVVG-NLNRQFHAERPNOQKVVTDVTEFKV-QGmKLYLSPIMDLYNGE  
 IVAYQIKRQPVFDLV-GQMLEEAIMKLSPE----RPMIHSQGWQYQHENYRHMLEK  
 HSLKQSMSRRGNCLDNAAMESFFGTLKSEFFYL----NSFDSIESLEAGLVEYIQYYN  
 Q-ERIKLLKGLSPVEYrERAQSAAXPRPSLGG"  
 /note="IS3\_IS51\_ORF1 e-value= 8.5e-39 complete sequence  
 hit coverage= 100%, length is 291aa with 18 gaps, 1  
 stops, frame= Plus1"  
 CDS 850681..851556  
 /colour="255 0 0"  
 /evidence=predicted  
 /translation="---AQAIQGLR-QVHTLSLLLEA--AELSRS-----TFYYQNH  
 VLAHPDQDEAAALCERIRAIYDQSQ-----RYGYRTVTLELANQGHRTNHKRVQRLMG  
 EMGLKSRVRVKRYRSFKG-AANVVVGNLNRQFHAERPNOQKVVTDVTEFKVQGMKLYL  
 SPIMDLYNGEIVAYQIKRQPVFDLVGQMLEEAIMKLSPE----ERPMIHSQGWQYQ  
 HENYRHMLEKHSKQSMSRRGNCLDNAAMESFFGTLKSEFFYLNSFDSIESLEAGLVE  
 YIQ-YYNQERIKLLKGLSPVEYRER-AQSAAXPRPSLGGH"  
 /note="IS3\_IS51\_ORF2 e-value= 1.2e-17 complete sequence  
 hit coverage= 100%, length is 292aa with 25 gaps, 1  
 stops, frame= Plus1"  
 CDS 850684..851520  
 /colour="255 0 0"  
 /evidence=predicted  
 /translation="QAIQGLRQVHTLSLLLEAAELSRSTFFYYQNHVLAHPD---QDEA  
 ALCERIRAIYDQSQGRYGYRTVTLELA-NQGHRTNHKRVQRLMGEMGLKSRVRV-KRY  
 RSFKgAANVVVGNLNRQFHAERPNOQKVVTDVTEFKVQGMKLYLSPIMDLYNGEIVAY  
 QIKRQPVFDLVGQMLEEAIMKLSPPERPMIHSQGWQYQHENYRHMLEKHSKQSMSR  
 RGCLDNAAMESFFGTLK--SEFFYLNSFDSIESLEAGLVEYIQ-YYNQERIKLLKGL  
 LSPVEYRERAQ"  
 /note="IS3\_IS3\_ORF1 e-value= 1.8e-74 complete sequence  
 hit coverage= 100%, length is 279aa with 8 gaps, 0 stops,  
 frame= Plus1"  
 CDS 850684..851520  
 /colour="255 0 0"  
 /evidence=predicted  
 /translation="QAIQGLRQVHTLSLLLEAAELSRSTFFYYQNHVLAHPD---QDEA  
 ALCERIRAIYDQSQGRYGYRTVTLELA-NQGHRTNHKRVQRLMGEMGLKSRVRV-KRY  
 RSFKgAANVVVGNLNRQFHAERPNOQKVVTDVTEFKVQGMKLYLSPIMDLYNGEIVAY

QIKRQPVFDLVGQMLEEAIMKLSPPERPMIHSQGWQYQHENYRHMLEKHSLKQSMSR  
 RGNCLDNAAMESFFGTLK--SEFFYLNSFDSIESLEAGLVEYIQ-YYNQERIKLKLKG  
 LSPVEYRERAQ"  
 /note="IS3\_IS3\_ORF1 e-value= 4.6e-75 complete sequence  
 hit coverage= 100%, length is 279aa with 8 gaps, 0 stops,  
 frame= Plus1"  
 CDS 850696..851532  
 /colour="255 0 0"  
 /evidence=predicted  
 /translation="GLRQVHTLSLLLEAAELSRSTFYQNHV-LAHPDQDEAALCERI  
 RAIYDQSQGRYGYRTVTLELANQGHRTNHKRVQRLMGEMGLKSRVRVKRYRSFKGAAN  
 VVVG-NDLNRQFHAER--PNQKWVTDVTEFKVQGMKLYLSPIMDLNGEIVAYQIKRQ  
 PVFDLVGQMLEEAIMK----LSPDERPMIHSQGWQYQHENYRHMLEKHSLKQSMSRR  
 GNCLDNAAMESFFGTLKSEFFYLNSFDSIESLEAGLVEYIQYY-NQERIKLKLKGLSP  
 VEYRERAQSAAX"  
 /note="IS3\_IS3\_ORF2 e-value= 1.2e-63 complete sequence  
 hit coverage= 100%, length is 279aa with 9 gaps, 1 stops,  
 frame= Plus1"  
 CDS 850696..851532  
 /colour="255 0 0"  
 /evidence=predicted  
 /translation="GLRQVHTLSLLLEAAELSRSTFYQNHV-LAHPDQDEAALCERI  
 RAIYDQSQGRYGYRTVTLELANQGHRTNHKRVQRLMGEMGLKSRVRVKRYRSFKGAAN  
 VVVG-NDLNRQFHAER--PNQKWVTDVTEFKVQGMKLYLSPIMDLNGEIVAYQIKRQ  
 PVFDLVGQMLEEAIMK----LSPDERPMIHSQGWQYQHENYRHMLEKHSLKQSMSRR  
 GNCLDNAAMESFFGTLKSEFFYLNSFDSIESLEAGLVEYIQYY-NQERIKLKLKGLSP  
 VEYRERAQSAAX"  
 /note="IS3\_IS3\_ORF2 e-value= 3.3e-64 complete sequence  
 hit coverage= 100%, length is 279aa with 9 gaps, 1 stops,  
 frame= Plus1"  
 CDS 850804..851505  
 /colour="255 0 0"  
 /evidence=predicted  
 /translation="AALCERIRAIYDQSQGRYGYRTVTLELANQGHRTNHKRVQRLMG  
 EMGLKSRVRVKRYRSFKGAANVVVG-NDLNRQFHAERPNOQKWVTDVTEFKV-QGmKLY  
 LSPIMDLNGEIVAYQIKRQPVFDLV-GQMLEEAIMKLSPE----RPMIHSQGWQY  
 QHENYRHMLEKHSLKQSMSRRGNCLDNAAMESFFGTLKSEFFYL----NSFDSIESLE  
 AGLVEYIQYYNQ-ERIKLKLKGLSPVEY"  
 /note="IS3\_IS51\_ORF1 e-value= 5e-45 fragment hit  
 coverage= 79.80%, length is 234aa with 12 gaps, 0 stops,  
 frame= Plus1"  
 CDS 850855..851382  
 /colour="255 0 0"  
 /evidence=predicted  
 /translation="YGYRTVTLELANQGHRTNHKRVQRLMGEMGLKSRVRVKRYRSFK  
 G-AANVVVGNDLNRQFHAERPNOQKWVTDVTEFKVQGMKLYLSPIMDLNGEIVAYQIK  
 RQPVFDLVGQMLEEAIMKLSPE-----ERPmiHSQGWQYQHENYRHMLEKHSLKQSM  
 SRRGNCLDNAAMESFFGTLKSE"  
 /note="IS3\_IS51\_ORF2 e-value= 7.8e-32 fragment hit  
 coverage= 57.41%, length is 176aa with 6 gaps, 0 stops,  
 frame= Plus1"  
 CDS 851359..851466  
 /colour="255 0 0"  
 /evidence=predicted  
 /translation="FFGTLKSEFFYLNS---FDSIESLEAGLVEYIQYYNQER"  
 /note="IS481 e-value= 3.8e-07 fragment hit coverage=  
 11.11%, length is 36aa with 3 gaps, 0 stops, frame=  
 Plus1"  
 CDS 1150204..1150311  
 /colour="255 0 0"

```

/evidence=predicted
/translation="LAYVVMPDHIHWLVEIR-AFSLDYIMQRFKSSSALRI"
/note="IS200 e-value= 6.8e-07 fragment hit coverage=
24.03%, length is 36aa with 1 gaps, 0 stops, frame=
Plus1"
CDS 1150204..1150311
/colour="255 0 0"
/evidence=predicted
/translation="LAYVVMPDHIHWLVEIR-AFSLDYIMQRFKSSSALRI"
/note="IS200_IS605 e-value= 5.7e-06 fragment hit
coverage= 24.18%, length is 36aa with 1 gaps, 0 stops,
frame= Plus1"
CDS 1775491..1776408
/colour="255 0 0"
/evidence=predicted
/translation="NGIGIDVSKRRLDIGTTDGQT-----LQVSNPSGYAELSTWL
STRP-----AIQIVLEATGGYEQTVLDFLHKA---GHPVIRANALRARRLA-QGLGKV
AKTDRLDALVLAQMA--ALVELPSYQPLEPW----QRKLREFVRRARQTMQALTVARQ
QQEMVTDRELRRQMQG-----
-----NIIRLQTLVERLGKQISEQVAQ-QPQLAVL
KS-----MKGVPALQAVLASYP-ELGQISGK-AIASLVGVAPISHDSG-AMR
GRRSIHG-GRAEIRQVLYMAAMSAMRHEPRLRDFYRSLRARGK---EGKVAIVAVMRK
MLVILNARVRDAE--NGLVPAXGQ"
/note="IS110 e-value= 3.4e-46 complete sequence hit
coverage= 100%, length is 306aa with 110 gaps, 1 stops,
frame= Plus1"
CDS 1775491..1776375
/colour="255 0 0"
/evidence=predicted
/translation="NGIGIDVSKRRLDIGTTDGQT-----LQVSNPSGYAELSTWL
STRP-----AIQIVLEATGGYEQTVLDFLHKA---GHPVIRANALRARRLA-QGLGKV
AKTDRLDALVLAQMA--ALVELPSYQPLEPW----QRKLREFVRRARQTMQALTVARQ
QQEMVTDRELRRQMQG-----
-----NIIRLQTLVERLGKQISEQVAQ-QPQLAVL
KS-----MKGVPALQAVLASYP-ELGQISGK-AIASLVGVAPISHDSG-AMR
GRRSIHG-GRAEIRQVLYMAAMSAMRHEPRLRDFYRSLRARGK---EGKVAIVAVMRK
MLVILNARVRD"
/note="IS110 e-value= 1e-48 fragment hit coverage=
96.88%, length is 295aa with 108 gaps, 0 stops, frame=
Plus1"
CDS 1896472..1897581
/colour="255 0 0"
/evidence=predicted
/translation="VQDRGGPT-----DRXVRPSGSGGCRAtgRVDPXSLRLEAATR
QRRCW PACRAGPERGS-APPQGXATQGHXRARHPKKSRRVL---CKGVRAKYAFMKQH
ADEFGLAAMCRMLGVHRSGYYAWLKEPASARDKDDQRLGLIKHSWLESGSVYGHRKV
TTDLR---ELGETCSRHRVARLMKSEGLRAMVGYGRRPRPLSGPVGSVAKNVLARGFK
VSEPNRAWVTDITYIRTY-DGFLYLAVVLDLFSRQVVGWATRPTQHTDLVLQALLAAV
WRRKPSGLLLHS-----DQGTQFTSEDWQSFLREHDIVCSMSRRGNCHDNAAMESFF
QLLKRRERIK--RRIYSNHDEARADVQYIEmFYNPKRRHSSNDGLSPVEFEKQYALN"
/note="IS3_IS150_ORF2 e-value= 1.2e-45 complete sequence
hit coverage= 100%, length is 370aa with 21 gaps, 4
stops, frame= Plus1"
CDS 1896673..1897578
/colour="255 0 0"
/evidence=predicted
/translation="ARHPKKSRRVLCKgVRAKYAFMKQHADEFGLAAMCRMLGVHRSG
YYAWLKePASARDKDDQRLGLIKHSWLESGSVYGHRKVTTDLRELGETCSRHRVARL
MKSEGLRAMVGYGR--RPRPLSGPVGSVAKNVLARGFKVSEPNRAWVTDITYIRT--Y
DGFLYLAVVLDLFSRQVVGWATRPTQHTDLVLQALLAAVWR-RKPSGLLLHSDQGTQ

```

```

FTSEDWQSFLREHDIVCSMSRRGNCHDNAAMESFFQLLKREIKRRIYSNHD--EARA
DVFOYIEMFYNPKRHRSSNDGLSPVEFEKQYAL"
/note="IS3_IS150_ORF1    e-value= 1.4e-57 complete sequence
hit coverage= 100%, length is 302aa with 7 gaps, 0 stops,
frame= Plus1"
CDS    1896697..1897590
/colour="255 0 0"
/evidence=predicted
/translation="RVLCKGVRAKYAFMkqhADEFGLAAMCRMLGVHRSGYYAWLK--
----EPASARDKDDQRLGLIKHWSWLESGSVYGHRKVTDDLRELGETCSR----HRV
ARLMkseGLRAMVgYRRRPRPLSGP---VGSVAknvlargfKVSEPNRAWVTDITYIR
TYDG-FLYLAVVLDLFSRQVVGWATRPTQ--HTDLVLQALLAAVWRR----KPSGLL
LH-SDQGTQFTSEDWQSFLREHDIVCSMSRRGNCHDNAAMESFFQLLKREIKrRIYS
NHDEARA--DVFOYIEMFYNPKRHRSSNDGLSPVEFEKQYALNGXR"
/note="IS3_IS2_ORF2    e-value= 1.4e-07 complete sequence
hit coverage= 100%, length is 298aa with 24 gaps, 1
stops, frame= Plus1"
CDS    1896700..1897578
/colour="255 0 0"
/evidence=predicted
/translation="VLCKgVRAKYAFMKQHADEFGLAAMCRMLGVHRsgYYAWLKePA
SARDKDDQRLGLIKHWSWLESGSVYGHRKVTDDLRELGETCSRHRVARLMKSEGLRAM
VGYGR--RPRPLSGPVGSVAKNVLARGFKVSEPNRAWVTDITYIRT--YDGFLYLAVV
LDLFSRQVVGWATRPTQHTDLVLQALLAAVWR-RKPSPGLLLHSDQGTQFTSEDWQSF
LREHDIVCSMSRRGNCHDNAAMESFFQLLKREIKRRIYSNHD--EARADVFOYIEMF
YNPKRRHSSNDGLSPVEFEKQYAL"
/note="IS3_IS150_ORF1    e-value= 5.1e-57 fragment hit
coverage= 97.06%, length is 293aa with 7 gaps, 0 stops,
frame= Plus1"
CDS    1896709..1897617
/colour="255 0 0"
/evidence=predicted
/translation="KGVRAKYAFMKQHAD--EFGLAAMCRMLGVH---RSGYYAWLKE
PASARDKDDQRLGLIKHWSWLESGS-----VYGHRKVTDDLRELGETCSRHRVARLMK
SEGLRAMVGYGRRRPRPLSGPVGSVAKNVLARGFKVSEPNRAWVTDITYIRTYDGFLYL
AVVLDLFSRQVVGWATRPTQHTDLVLQALLAAVWRRKPS-----PGLLLHSDQGTQFT
SEDWQSFLREHDIVCSMSRRGNCHDNAAMESFFQLLKREIKRRIYSNHDEARADVFO
YIEMFYNPKRHRSSNDGLSPVEFEKQYALNGxRLSRKPWAIQ"
/note="IS3_IS51_ORF2    e-value= 1.4e-134 complete
sequence hit coverage= 100%, length is 303aa with 15 gaps, 0
stops, frame= Plus1"
CDS    1896727..1897572
/colour="255 0 0"
/evidence=predicted
/translation="YAFMKQHADEFGLAAMCRMLGVHRSGYYAWL-----KEPASARD
KDDQRLGLIKHWSWLESGSVYGHRKVTDDLRELGETCSRHRVARLMKSEGLRAMVGYG
RRRPRPLSGPVGSVAKNVLARGFKVSEPNRAWVTDITYIRTYDGFLYLAVVLDLFSRQV
VGWATRPTQHTDLV-LQALLAAVWRRKPS----GLLLHSDQGTQFTSEDWQSFLREH
DIVCSMSRRGNCHDNAAMESFFQLLKREIKR----RIYSNHDEARADVFOYIEMFYN
PKRRHSSNDGLSPVEFEKQY"
/note="IS3_IS51_ORF1    e-value= 3.9e-110 fragment hit
coverage= 96.42%, length is 282aa with 14 gaps, 0 stops,
frame= Plus1"
CDS    1896727..1897605
/colour="255 0 0"
/evidence=predicted
/translation="YAFMKQHADEFGLAAMCRMLGVHRSGYYAWL-----KEPASARD
KDDQRLGLIKHWSWLESGSVYGHRKVTDDLRELGETCSRHRVARLMKSEGLRAMVGYG
RRRPRPLSGPVGSVAKNVLARGFKVSEPNRAWVTDITYIRTYDGFLYLAVVLDLFSRQV

```

VGWATRPTQHTDLV-LQALLAAVWRRKPS-GLLLHSDQGTQFTSEDWQSFLREH  
DIVCSMSRRGNCHDNAAMESFFQLLKREIKR-RIYSNHDEARADVFOYIEMFYN  
PKRRHSSNDGLSPVEFEKQYALNGXRLSRKP"  
/note="IS3\_IS51\_ORF1 e-value= 3.7e-108 complete

sequence

hit coverage= 100%, length is 293aa with 14 gaps, 1  
stops, frame= Plus1"

CDS

1896730..1897575  
/colour="255 0 0"  
/evidence=predicted  
/translation="AFMKQHADEFGLAAMCRMLGVHRSGYYAWLKE--PASARDKDDQ  
RLGLIKHSWLESGSVYGHRKVTDLR-ELGETCSRHRVARLMKSEGLRAMVGYG-RR  
PRPLSgPVGSVAKNVLARGFKVSEPNRAWVTDITYIRTYDGFYLYAVVLDLFSRQVVG  
WATRPTQHTDLV-LQALLAAVWRRKPS-GLLLHSDQGTQFTSEDWQSFLREH  
DIVCSMSRRGNCHDNAAMESFFQLLK--RERIKRRIYSNHDEARADVFOYIEMFYN  
PKRRHSSNDGLSPVEFEKQYA"

/note="IS3\_IS3\_ORF1 e-value= 1.9e-94 complete sequence  
hit coverage= 100%, length is 282aa with 6 gaps, 0 stops,  
frame= Plus1"

CDS

1896730..1897575  
/colour="255 0 0"  
/evidence=predicted  
/translation="AFMKQHADEFGLAAMCRMLGVHRSGYYAWLKE--PASARDKDDQ  
RLGLIKHSWLESGSVYGHRKVTDLR-ELGETCSRHRVARLMKSEGLRAMVGYG-RR  
PRPLSgPVGSVAKNVLARGFKVSEPNRAWVTDITYIRTYDGFYLYAVVLDLFSRQVVG  
WATRPTQHTDLV-LQALLAAVWRRKPS-GLLLHSDQGTQFTSEDWQSFLREH  
DIVCSMSRRGNCHDNAAMESFFQLLK--RERIKRRIYSNHDEARADVFOYIEMFYN  
PKRRHSSNDGLSPVEFEKQYA"

/note="IS3\_IS3\_ORF1 e-value= 4.9e-95 complete sequence  
hit coverage= 100%, length is 282aa with 6 gaps, 0 stops,  
frame= Plus1"

CDS

1896742..1897587  
/colour="255 0 0"  
/evidence=predicted  
/translation="QHADEFGLAAMCRMLGVHRSGYYAWLKEPASARDKDDQRLGLI  
KHSWLESGSVYGHRKVTDLRELGETCSRHRVARLMKSEGLRAMVGYGRRPRPLSGPV  
GSVAK-NVLARGFKVSE--PNRAWVTDITYIRTYDGFYLYAVVLDLFSRQVVGWATR  
PTQHTDLV-LQALLAAVWR---RKPS-GLLLHSDQGTQFTSEDWQSFLREH  
DIVCSMSRRGNCHDNAAMESFFQLLKREIKRRIYSNHDEARADVFOYIEMFYN  
PKRRHSSNDGLSPVEFEKQYALNGX"

/note="IS3\_IS3\_ORF2 e-value= 7.1e-102 complete

sequence

hit coverage= 100%, length is 282aa with 7 gaps, 1 stops,  
frame= Plus1"

CDS

1896742..1897587  
/colour="255 0 0"  
/evidence=predicted  
/translation="QHADEFGLAAMCRMLGVHRSGYYAWLKEPASARDKDDQRLGLI  
KHSWLESGSVYGHRKVTDLRELGETCSRHRVARLMKSEGLRAMVGYGRRPRPLSGPV  
GSVAK-NVLARGFKVSE--PNRAWVTDITYIRTYDGFYLYAVVLDLFSRQVVGWATR  
PTQHTDLV-LQALLAAVWR---RKPS-GLLLHSDQGTQFTSEDWQSFLREH  
DIVCSMSRRGNCHDNAAMESFFQLLKREIKRRIYSNHDEARADVFOYIEMFYN  
PKRRHSSNDGLSPVEFEKQYALNGX"

/note="IS3\_IS3\_ORF2 e-value= 2e-102 complete sequence

hit

coverage= 100%, length is 282aa with 7 gaps, 1 stops,  
frame= Plus1"

CDS

1896754..1897581  
/colour="255 0 0"  
/evidence=predicted

```

/translation="EFGLAAMCRMLGVHRSGYYAWLKEPASARDKDDQRLGLIKHSW
LESGSVYGHRKVTTDLR---ELGETCSRHRVARLMKSEGLRAMVGYGRRPRPLSGPVG
SVAKNVLARGFKVSEPNRAWVTDITYIRTY-DGFLYLAVVLDLFSRQVVGWATRPTQH
TDLVLQALLAAVWRRKPSGLLLHS-----DQGTQFTSEDWQSFLEHDIVCSMSRRG
NCHDNAAMESFFQLLKRRERIK--RRIYSNHDEARADVFOYIEMFYNPKRHRSSNDGLS
PVEFEKQYALN"
/note="IS3_IS150_ORF2 e-value= 1.9e-74 fragment hit
coverage= 73.52%, length is 276aa with 11 gaps, 0 stops,
frame= Plus1"
CDS 1896757..1897575
/colour="255 0 0"
/evidence=predicted
/translation="FGLAAMCRMLGVH---RSGYYAWLKEPASARDKDDQRLGLIKH
SWLESGS-----VYGHRKVTTDLRELGETCSRHRVARLMKSEGLRAMVGYGRRPRPLS
GPVGSVAKNVLARGFKVSEPNRAWVTDITYIRTYDGFLYLAVVLDLFSRQVVGWATRP
TQHTDLVLQALLAAVWRRKPS-----PGLLLHSDQGTQFTSEDWQSFLEHDIVCSMS
RRGNCHDNAAMESFFQLLKRRERIKRRIYSNHDEARADVFOYIEMFYNPKRHRSSNDGL
SPVEFEKQYA"
/note="IS3_IS51_ORF2 e-value= 7.1e-152 fragment hit
coverage= 90.22%, length is 273aa with 13 gaps, 0 stops,
frame= Plus1"
CDS 1925629..1925757
/colour="255 0 0"
/evidence=predicted
/translation="VATAPRQLWCWDMTFLPRdVAGrWFFFLYLIMDVYSRKIVGFEV"
/note="IS3_IS51_ORF1 e-value= 3.8e-06 fragment hit
coverage= 13.36%, length is 43aa with 0 gaps, 0 stops,
frame= Plus1"
CDS 1925629..1925757
/colour="255 0 0"
/evidence=predicted
/translation="VATAPRQLWCWDMTFLpRDVAGrWFFFLYLIMDVYSRKIVGFEV"
/note="IS3_IS51_ORF2 e-value= 2.3e-08 fragment hit
coverage= 12.93%, length is 43aa with 0 gaps, 0 stops,
frame= Plus1"
CDS 1925632..1926123
/colour="255 0 0"
/evidence=predicted
/translation="ATAPRQLWCWDMTFLpRDVA-GRWFFFLYLIMDVYSRKIVGFEVH
EdddwDHAARLVQrTALAEGIHAMPRDERPVLHG-----DNGATLKATTVLAMLWWLG
VKPSYSRPRVSDDNFVESLFRtAKYRpEFP--EKGFTDLCAAREWARQFVHWYNHHD
RHSGIRYVSPAQ"
/note="IS3_IS150_ORF2 e-value= 2.6e-08 fragment hit
coverage= 42.16%, length is 164aa with 8 gaps, 0 stops,
frame= Plus1"
CDS 2293057..2293974
/colour="255 0 0"
/evidence=predicted
/translation="NGIGIDVSKRRLDIGTTDGQT-----LQVSNSPSGYAEELSTWL
STRP-----AIQIVLEATGGYEQTVLDLFLHKA---GHPVIRANALRARRLA-QGLGKV
AKTDRLDALVLAQMA--ALVELPSYQPLEPW----QRKLREFVRARRQTMQALTVARQ
QQEMVTDRELRRQMQG-----
-----NIIRLQTLVERLQKQISEQVAQ-QPQLAVL
KS-----MKGVG PALQAVLASYP-ELGQISGK-AIASLVGVAPISHDSG-AMR
GRRSIHG-GRAEIRQVLYMAAMSAMRHEPRLRDFYRSLRARGK---EGKVAIVAVMRK
MLVILNARVRDAE--NGLVPAXGQ"
/note="IS110 e-value= 3.4e-46 complete sequence hit
coverage= 100%, length is 306aa with 110 gaps, 1 stops,
frame= Plus1"
CDS 2293057..2293941

```



/colour="255 0 0"  
/evidence=predicted  
/translation="NGIGIDVSKRRLDIGTTDGQT-----LQVSNSPSGYAEI STWL  
STRP-----AIQIVLEATGGYEQTVLDFLHKA---GHPVIRANALRARRLA-QGLGKV  
AKTDRLDALVLAQMA--ALVELPSYQPLEPW----QRKLEFVRRARQTMQALTVARQ  
QQEMVTDRELRRQMQG-----  
-----NIIRLQTLVERLGKQISEQVAQ-QPOLAVL  
KS-----MKGVPALQAVLASYP-ELGQISGK-AIASLVGVAPISHDSG-AMR  
GRRSIHG-GRAEIRQVLYMAAMSAMRHEPRLRDFYRSLRARGK---EGKVAIVAVMRK  
MLVILNARVRD"  
/note="IS110 e-value= 1e-48 fragment hit coverage=  
96.88%, length is 295aa with 108 gaps, 0 stops, frame=  
Plus1"

CDS

2448280..2449305  
/colour="255 0 0"  
/evidence=predicted  
/translation="LPPAWLQ RGLVLPVAQQVRRHERARRQAAQSGGGGEHTPEEAAG  
RTGLRERRHQGCVAKKVV TAPARRLLVRS MVEKGLSERRALT VVRMSASALRYEPRPD  
N-NVELREQIAALAHRRRYGVGMIHLKLRQKGLVVNYKRVERLYQEAGLQVRRRK-R  
KKVPVSRQPLLRPSAANEVWSMDFVFERTAEGRVVKCLTIVDDATHEAVAIEVERAI  
SGQGVSRVLDRLAMQRGLPRVIRTDNGKEFCGKAMVAWAHEKEVALRLIEPGKPNQNA  
YIESFNGLRDRDECLNEHWFPTLLHARTSIESWRRDYNEERP KRALGGLTPAQYAAQLA  
AKNDNISTGL"  
/note="IS3\_IS407\_ORF2 e-value= 2.1e-202 complete

sequence

hit coverage= 100%, length is 342aa with 2 gaps, 0 stops,  
frame= Plus1"

CDS

2448280..2449305  
/colour="255 0 0"  
/evidence=predicted  
/translation="LPPAWLQ RGLVLPVAQQVRRHERARRQAAQSGGGGEHTPEEAAG  
RTGLRERRHQGCVAKKVV TAPARRLLVRS MVEKGLSERRALT VVRMSASALRYEPRPD  
N-NVELREQIAALAHRRRYGVGMIHLKLRQKGLVVNYKRVERLYQEAGLQVRRRK-R  
KKVPVSRQPLLRPSAANEVWSMDFVFERTAEGRVVKCLTIVDDATHEAVAIEVERAI  
SGQGVSRVLDRLAMQRGLPRVIRTDNGKEFCGKAMVAWAHEKEVALRLIEPGKPNQNA  
YIESFNGLRDRDECLNEHWFPTLLHARTSIESWRRDYNEERP KRALGGLTPAQYAAQLA  
AKNDNISTGL"  
/note="IS3\_IS407\_ORF2 e-value= 5.4e-203 complete

sequence

hit coverage= 100%, length is 342aa with 2 gaps, 0 stops,  
frame= Plus1"

CDS

2448421..2449278  
/colour="255 0 0"  
/evidence=predicted  
/translation="LRERRHQGCVAKKVV TAPARRLLVRS MVEKGLSERRALT VVRMS  
ASALRYEP-RPDNNVELREQIA-ALAHRRRYGVGMIHLKLRQKGLVVNYKRVERLYQ  
EAGLQVRRRK RK-----KVPVSE----RQPLLRPSAANEVWSMDFVFERT-AEGR  
VVKCLTIVDDATHEAVAIEVERAISGQGVSRVLDRLAMQ-RGLPR--VIRTDNGKEFC  
GKAMVAWAHEKEVALRLIEPGKPNQNA YIESFNGLRDRDECLNEHWFPTLL--HARTSI  
ESWRRDYNEE-RPKRALGGLTPAQYAAQLAA"

/note="IS3\_IS150\_ORF1 e-value= 6.2e-15 complete sequence  
hit coverage= 100%, length is 286aa with 21 gaps, 0  
stops, frame= Plus1"

CDS

2448460..2448705  
/colour="255 0 0"  
/evidence=predicted  
/translation="VVTAPARRLLVRS MVE-KGLSERRALT VVRMSASALR-YEPR-P  
DNNVELREQIAALAHRRRYGVGMIHLKLR-QKGLVVNYKR V"  
/note="IS3\_IS407\_ORF1 e-value= 1.1e-17 complete sequence  
hit coverage= 100%, length is 82aa with 4 gaps, 0 stops,

frame= Plus1"  
 CDS 2448460..2448705  
 /colour="255 0 0"  
 /evidence=predicted  
 /translation="VVTAPARRLLVRSME-KGLSERRALTVVRMSASALR-YEPR-P  
 DNNVELREQIAALAHRRRYGVGMIHLKLR-QKGLVVNYKRV"  
 /note="IS3\_IS407\_ORF1 e-value= 8.5e-17 complete sequence  
 hit coverage= 100%, length is 82aa with 4 gaps, 0 stops,  
 frame= Plus1"  
 CDS 2448481..2449275  
 /colour="255 0 0"  
 /evidence=predicted  
 /translation="RLLVRSMEKGLSERRALTVVRMSA--SALRY----EPRPDNNV  
 ELREQIAALAHRRR-RYGVGMIHLKLR-QKGLVVNYKRVERLYQEAGLQVRRRKRKKv  
 PVSERQPLLR-----PSAANEVWMDVVFERTAEGRVVKCLTIVDDATHEAV  
 AIEVERAISGQGVSRVLDRLAMQRLPR--VIRTDNGKEFCGKAMVAWAHEKEVALRL  
 IEPGKPNQAYIESFNGRLRDECLNEH--WFPTLLHARTSIESWRR-DYNEERPKRAL  
 GGLTPAQYAAQLA"  
 /note="IS3\_IS3\_ORF1 e-value= 8.7e-09 complete sequence  
 hit coverage= 100%, length is 265aa with 24 gaps, 0  
 stops, frame= Plus1"  
 CDS 2448502..2449278  
 /colour="255 0 0"  
 /evidence=predicted  
 /translation="VEKGLSERRALTVVRMSASALRYEP-RPDNNVELREQIA-ALAH  
 RHRRYGVGMIHLKLRQKGLVVNYKRVERLYQEAGLQVRRRKRK-----KVPVSE-  
 ---RQPLLRPSAANEVWMDVVFERT-AEGRVVKCLTIVDDATHEAVAIEVERAISGQ  
 GVSRLDRLAMQ-RGLPR--VIRTDNGKEFCGKAMVAWAHEKEVALRLIEPGKPNQNA  
 YIESFNGRLRDECLNEHWFPTLL--HARTSIESWRRDYNEE-RPKRALGGLTPAQYAA  
 QLAA"  
 /note="IS3\_IS150\_ORF1 e-value= 4.2e-17 fragment hit  
 coverage= 91.50%, length is 259aa with 21 gaps, 0 stops,  
 frame= Plus1"  
 CDS 2449078..2449281  
 /colour="255 0 0"  
 /evidence=predicted  
 /translation="PGKPNQAYIESFNGRLRDECLN--EHWFPPTLLHARTSIESWRR  
 DYNEERPKRALGGLTPAQYAAQLAAK"  
 /note="IS3\_IS150\_ORF2 e-value= 2.9e-08 fragment hit  
 coverage= 17.99%, length is 68aa with 2 gaps, 0 stops,  
 frame= Plus1"  
 CDS 2449081..2449260  
 /colour="255 0 0"  
 /evidence=predicted  
 /translation="GKPNQAYIESFNGRLRDECLNEHWFPTLLHARTSIESWRRDY-  
 NEERPKRALGGLTPAQY"  
 /note="IS3\_IS3\_ORF2 e-value= 6.9e-07 fragment hit  
 coverage= 21.18%, length is 60aa with 1 gaps, 0 stops,  
 frame= Plus1"  
 CDS 2449096..2449275  
 /colour="255 0 0"  
 /evidence=predicted  
 /translation="NAYIESFNGRLRDECLNEH--WFPTLLHARTSIESWRR-DYNEE  
 RPKRALGGLTPAQYAAQLA"  
 /note="IS3\_IS3\_ORF1 e-value= 2.9e-08 fragment hit  
 coverage= 22.03%, length is 60aa with 3 gaps, 0 stops,  
 frame= Plus1"  
 CDS 2494939..2495808  
 /colour="255 0 0"  
 /evidence=predicted

```

/translation="Y--WGS GK SASADG TKWSVYEDNLLSEYHIRYGGYG-GIGYYHV
SDKY-VALFSHFIPCGVHEGIYILDGLLAN--TSDIQPEIVHGD TQAQSY PVFGLAHM
LGIQLMPRI RN IKDLTFFRPEPGRAY-KNIQALFGDSIDWRLIATHLHDM LRVVISIR
LGKITASSILRRLGTYSRKNKLYFAFREL GKAVRTLFLLLRYIDDNEIRKTIHAATNKS
EEYNGFVKWVFFGSQGI IAENVQHEQRKIIKYSQLVANMIILHNVEGMSRTLAEMRKE
GIELTPEILAGLSPYRTSHIN"
/note="Tn3 e-value= 1.5e-20 fragment hit coverage=
29.48%, length is 290aa with 7 gaps, 0 stops, frame=
Plus1"
CDS 3623575..3624492
/colour="255 0 0"
/evidence=predicted
/translation="NGIGIDVSKRRLDIGTTDGQT-----LQVSNSPSGY AELSTWL
STRP-----AIQIVLEATGGYEQTVLDFLHKA---GHPVIRANALRARRLA-QGLGKV
AKTDRLDALVLAQMA--ALVELPSYQPLEPW----QRKLREFVRRARQTMQALTVARQ
QQEMVTDRELRRQMQG-----
-----NIIRLQTLVERLGKQISEQVAQ-QPOLAVL
KS-----MKG VGPALQAVLAS YLP-ELGQISGK-AIASLVGVAPISHDSG-AMR
GRRSIHG-GRAEIRQVLYMAAMSAMRHEPRLRDFYRSLRARGK---EGKVAIVAVMRK
MLVILNARVRDAE--NGLVPAXGQ"
/note="IS110 e-value= 3.4e-46 complete sequence hit
coverage= 100%, length is 306aa with 110 gaps, 1 stops,
frame= Plus1"
CDS 3623575..3624459
/colour="255 0 0"
/evidence=predicted
/translation="NGIGIDVSKRRLDIGTTDGQT-----LQVSNSPSGY AELSTWL
STRP-----AIQIVLEATGGYEQTVLDFLHKA---GHPVIRANALRARRLA-QGLGKV
AKTDRLDALVLAQMA--ALVELPSYQPLEPW----QRKLREFVRRARQTMQALTVARQ
QQEMVTDRELRRQMQG-----
-----NIIRLQTLVERLGKQISEQVAQ-QPOLAVL
KS-----MKG VGPALQAVLAS YLP-ELGQISGK-AIASLVGVAPISHDSG-AMR
GRRSIHG-GRAEIRQVLYMAAMSAMRHEPRLRDFYRSLRARGK---EGKVAIVAVMRK
MLVILNARVRD"
/note="IS110 e-value= 1e-48 fragment hit coverage=
96.88%, length is 295aa with 108 gaps, 0 stops, frame=
Plus1"
CDS 1896455..1896598
/colour="255 0 0"
/evidence=predicted
/translation="KRYTDEFKIEAVRQIVEYGRPVAEVAERLGVSIHSLYGWKROQG
KGDV"
/note="IS3_IS407_ORF1 e-value= 7.7e-06 fragment hit
coverage= 55.81%, length is 48aa with 0 gaps, 0 stops,
frame= Plus2"
CDS 1896608..1896736
/colour="255 0 0"
/evidence=predicted
/translation="VEQDQNAEVRRLKAELRRVTEERDILK--KAAAYFAKGXEQSTP
S"
/note="IS3_IS51_ORF1 e-value= 3.2e-08 fragment hit
coverage= 14.66%, length is 43aa with 2 gaps, 1 stops,
frame= Plus2"
CDS 2371592..2372467
/colour="255 0 0"
/evidence=predicted
/translation="FGIGIDVSKATLDVAVHGEQ-----FRQFSNDKRGFVRLIRWL
KTWP-----IKQVVLEASGGYERAALDVLHAA---GLPMVRINPARARRFAQGT-GRA
AKTDRLDATVLAQMAHLLPLTRYVP--PAPW---QORLAEFAQCRRQLVQMRVSEMQR
LRRLVDPDLIA-----

```

```

-----MKQRHIAQLSDDLKQLDKAIAEQLEGQPGW
KNIGA-----LKGVPILISTLACELP-ELGSLGSK-AIASLVGLAPMNRESG-TWQ
GQRRISG-GRAVVREALYMAALTAIRYEPRLRAFYAGLKAKGK---ASKVALVAVMRK
MLVILNAR"
/note="IS110 e-value= 1.4e-51 fragment hit coverage=
96.15%, length is 292aa with 108 gaps, 0 stops, frame=
Plus2"
CDS
2371592..2372530
/colour="255 0 0"
/evidence=predicted
/translation="FGIGIDVSKATLDVAVHGEQ-----FRQFSNDKRGFVRLIRWL
KTWP-----IKQVVLEASGGYERAALDVLHAA---GLPMVRINPARARRFAQGT-GRA
AKTDRLDATVLAQMAHLLPLTRYVP--PAPW---QORLAEFAQCRRQLVQMRVSEMQR
LRRLVDPDLIA-----
-----MKQRHIAQLSDDLKQLDKAIAEQLEGQPGW
KNIGA-----LKGVPILISTLACELP-ELGSLGSK-AIASLVGLAPMNRESG-TWQ
GQRRISG-GRAVVREALYMAALTAIRYEPRLRAFYAGLKAKGK---ASKVALVAVMRK
MLVILNARKrdaeVALGCPXQDSCYFSAS"
/note="IS110 e-value= 1.7e-49 complete sequence hit
coverage= 100%, length is 313aa with 108 gaps, 1 stops,
frame= Plus2"
CDS
2448206..2448475
/colour="255 0 0"
/evidence=predicted
/translation="KKRFSEEQIIGFLREAESG-----MPIKDLCR
QHGFSEASYLWRSKFGGMSVPDAKRHKDLEAENTRLKLLAEQVFENDVIKDARKK
WXPR-R"
/note="IS3_IS150_ORF1 e-value= 1.8e-12 fragment hit
coverage= 35.29%, length is 90aa with 18 gaps, 1 stops,
frame= Plus2"
CDS
2448206..2448463
/colour="255 0 0"
/evidence=predicted
/translation="KKRFSEEQIIGFLREAESGMPIKDLCRQHGFSEASYLWRSKFG
GMSVPDAKRHKDLEAENTRLKLLAEQVFENDVIKDARKKW"
/note="IS3_IS407_ORF1 e-value= 3.2e-46 complete sequence
hit coverage= 100%, length is 86aa with 0 gaps, 0 stops,
frame= Plus2"
CDS
2448206..2448463
/colour="255 0 0"
/evidence=predicted
/translation="KKRFSEEQIIGFLREAESGMPIKDLCRQHGFSEASYLWRSKFG
GMSVPDAKRHKDLEAENTRLKLLAEQVFENDVIKDARKKW"
/note="IS3_IS407_ORF1 e-value= 8.1e-47 complete sequence
hit coverage= 100%, length is 86aa with 0 gaps, 0 stops,
frame= Plus2"
CDS
2756306..2757181
/colour="255 0 0"
/evidence=predicted
/translation="FGIGIDVSKATLDVAVHGEQ-----FRQFSNDKRGFVRLIRWL
KTWP-----IKQVVLEASGGYERAALDVLHAA---GLPMVRINPARARRFAQGT-GRA
AKTDRLDATVLAQMAHLLPLTRYVP--PAPW---QORLAEFAQCRRQLVQMRVSEMQR
LRRLVDPDLIA-----
-----MKQRHIAQLSDDLKQLDKAIAEQLEGQPGW
KNIGA-----LKGVPILISTLACELP-ELGSLGSK-AIASLVGLAPMNRESG-TWQ
GQRRISG-GRAVVREALYMAALTAIRYEPRLRAFYAGLKAKGK---ASKVALVAVMRK
MLVILNAR"
/note="IS110 e-value= 1.4e-51 fragment hit coverage=
96.15%, length is 292aa with 108 gaps, 0 stops, frame=
Plus2"

```

CDS 2756306..2757214  
/colour="255 0 0"  
/evidence=predicted  
/translation="FGIGIDVSKATLDVAVHGEQ-----FRQFSNDKRGFVRLIRWL  
KTWP-----IKQVLEASGGYERAALDVLHAA---GLPMVRINPARARRFAOQT-GRA  
AKTDRLDATVLAQMAHLLPLTRYVP--PAPW---QORLAEFAQCRRQLVQMRVSEMQR  
LRRLVDPDLIA-----  
-----MKQRHIAQLSDDLKQLDKAIAEQLEGQPGW  
KNIGA-----LKGVPILISTLACELP-ELGSLGSK-AIASLVGLAPMNRESG-TWQ  
GQRRISG-GRAVVREALYMAALTAIRYEPRLRAFYAGLKAKGK---ASKVALVAVMRK  
MLVILNARKR-----DAEVALSCP"  
/note="IS110 e-value= 3.1e-48 complete sequence hit  
coverage= 100%, length is 303aa with 113 gaps, 0 stops,  
frame= Plus2"

CDS 3087821..3088948  
/colour="255 0 0"  
/evidence=predicted  
/translation="---QAMRSVHVEAKEvQRRVQAWCggAGKPVGCELRPGPSGAGn  
pgyVTDTLAXGAGSGVSRICWCRDAPGRGACAVEARTSPGE-EGAGFFARSGDvlcq  
gIILRYQVIERCRDEFPVRLMCRCLKVSASGYDWSKRLPSAGQLENQRLLDQIRALH  
EDSRGTLGAGRMQEDLA---DAGHSLSLNRVARLMAADGLQGWP RPK-----RRGQQG  
RPAltlpgvRNRLERDFSALEPETKWVTDITEIKTQ-QSKLYLCIVLDFDQRVVGS  
MQHRQDRQMVIRAVQMAVWQROESYEVILHS-----DRGTQFRSGDYQRYLAANSLVC  
SMSAVGHCGDNAACEGFFGLLKREIRY--RTSYPTLDAARADVFDYIE----RRHNPR  
M-----RRRVARQ"  
/note="IS3\_IS150\_ORF2 e-value= 7.4e-24 complete sequence  
hit coverage= 100%, length is 376aa with 32 gaps, 1  
stops, frame= Plus2"

CDS 3088076..3088975  
/colour="255 0 0"  
/evidence=predicted  
/translation="AGFFARSGDVLCQgIILRYQVIERCRDEFPVRLMCRCLKvSASG  
YYDWSKRLPSAGQLENQRLLDQIRALHEDSRGTLGAGRMQEDLADAGHSLSLNRVARL  
MAADGLQG-WRPK--RRGQQGRPALTLpgvRNRLERDFSALEPETKWVTDITEIKT-  
-QSKLYLCIVLDFDQRVVGSWMQHRQDRQMVIRAVQMAVWQ-RQESYEVILHSDRG  
TQFRSGDYQRYLAANSLVCSMSAVGHCGDNAACEGFFGLLKREIRYRTSYPTLD--AA  
RADVFDYIERRHNP---RMRRRVARQDQKVAALLE"  
/note="IS3\_IS150\_ORF1 e-value= 6e-28 complete sequence  
hit coverage= 100%, length is 300aa with 11 gaps, 0  
stops, frame= Plus2"

CDS 3088112..3089023  
/colour="255 0 0"  
/evidence=predicted  
/translation="QGIILRYQVIERCRD--EFPVRLMCRCLKVS---ASGYDWSKR  
LPSAGQLENQRLLDQIRALHEDSRG-----TLGAGRMQEDLADAGHSLSLNRVARLMA  
ADGLQGW--PRPKRRGQQGRPALTLpgvRNRLERDFSALEPETKWVTDITEIKTQSK  
LYLCIVLDFDQRVVGSWMQHRQDRQMVIRAVQMAVWQROES-----YEVILHSDRG  
TQFRSGDYQRYLAANSLVCSMSAVGHCGDNAACEGFFGLLKREIRYRTSYPTLDAARAD  
VFDYIERRHNPmRRRVARQDQKVAALLEPSVISGXNPIVPSAAX"  
/note="IS3\_IS51\_ORF2 e-value= 9.2e-49 complete sequence  
hit coverage= 100%, length is 304aa with 17 gaps, 2  
stops, frame= Plus2"

CDS 3088130..3088909  
/colour="255 0 0"  
/evidence=predicted  
/translation="YQVIERCRDEFPVRLMCRCLKVSASGYDWS-----KRLPSAGQ  
LENQRLLDQIRALHEDSRGTLGAGRMQEDLADAGHSLSLNRVARLMAADGLQGWP RPK  
RRgQQGRPALTLPGVNRRLERDFSALEPETKWVTDITEIKTQSKLYLCIVLDFDQ  
RVVGSWMQHRQDRQMV-IRAVQMAVWQROESY-----EVILHSDRG TQFRSGDYQRYLAA  
NSLVCSMSAVGHCGDNAACEGFFGLLKREIRYR----TSYPTLDAARADVFDYIER"

```

/note="IS3_IS51_ORF1      e-value= 3.8e-62 fragment hit
coverage= 88.93%, length is 260aa with 14 gaps, 0 stops,
frame= Plus2"
CDS      3088130..3089008
/colour="255 0 0"
/evidence=predicted
/translation="YQVIERCDEFPPVRLMCRCLKVSASGYDWS-----KRLPSAGQ
LENQRLLDQIRALHEDSRGTLGAGRMQEDLADAGHSLSLNRVARLMAADGLQGWRPK
RRgQQGRPALTLPGVRNRLERDFSALEPETKWVTDITEIKTQQSKLYLCIVLDFDQR
VVGWSMQHRQDRQMV-IRAVQMAVWQRQESY----EVILHSDRGTQFRSGDYQRYLAA
NSLVCSMSAVGHCGDNAACEGFFGLLKREIRYR----TSYPTLDAARADVFDYIERRH
NprMRRRVARQDQKVAALLE---PSVISGXNPIV"
/note="IS3_IS51_ORF1      e-value= 1.3e-54 complete sequence
hit coverage= 100%, length is 293aa with 17 gaps, 1
stops, frame= Plus2"
CDS      3088133..3088906
/colour="255 0 0"
/evidence=predicted
/translation="QVIERCDEFPPVRLMCRCLKVSASGYDWSKRLPSAGQLENQRL
LDQIRALHEDSRGTLGAGRMQEDLA---DAGHSLSLNRVARLMAADGLQGWRPK---
--RRGQQGRPALtlpgvrNRLERDFSALEPETKWVTDITEIKTQ-QSKLYLCIVLDF
DQRVVGWSMQHRQDRQMVIRAVQMAVWQRQESYEVILHS-----DRGTQFRSGDYQRY
LAANSLVCSMSAVGHCGDNAACEGFFGLLKREIRY--RTSYPTLDAARADVFDYIE"
/note="IS3_IS150_ORF2     e-value= 4.1e-56 fragment hit
coverage= 68.89%, length is 258aa with 16 gaps, 0 stops,
frame= Plus2"
CDS      3088133..3088906
/colour="255 0 0"
/evidence=predicted
/translation="QVIERCDEFPPVRLMCRCLKVSASGYDWSKR--LPSAGQLENQ
RLLDQIRALHEDSRGTLGAGRMQEDLA-DAGHSLSLNRVARLMAADGLQGWRPKRRG
QQGRpALTlPGVRNRLERDFSALEPETKWVTDITEIKTQQSKLYLCIVLDFDQRVVG
WSMQHRQDRQMVIRAVQMAVWQRQESYEVILHSDRGTQFRSGDYQRYLAANSLVCSMS
AVGHCGDNAACEGFFGLLK--RERIYRTSYPTLDAARADVFDYIE"
/note="IS3_IS3_ORF1      e-value= 8e-71 fragment hit
coverage=
91.26%, length is 258aa with 5 gaps, 0 stops, frame=
Plus2"
CDS      3088133..3088966
/colour="255 0 0"
/evidence=predicted
/translation="QVIERCDEFPPVRLMCRCLKVSASGYDWSKR--LPSAGQLENQ
RLLDQIRALHEDSRGTLGAGRMQEDLA-DAGHSLSLNRVARLMAADGLQGWRPKRRG
QQGRpALTlPGVRNRLERDFSALEPETKWVTDITEIKTQQSKLYLCIVLDFDQRVVG
WSMQHRQDRQMVIRAVQMAVWQRQESYEVILHSDRGTQFRSGDYQRYLAANSLVCSMS
AVGHCGDNAACEGFFGLLK--RERIYRTSYPTLDAARADVFDYIERRHNP-RMRRRVA
----RQDQKVAA"
/note="IS3_IS3_ORF1      e-value= 1.3e-67 complete sequence
hit coverage= 100%, length is 278aa with 10 gaps, 0
stops, frame= Plus2"
CDS      3088145..3088906
/colour="255 0 0"
/evidence=predicted
/translation="RCRDEFPPVRLMCRCLKVSASGYDWSKRLPSAGQLENQRLLDQI
RALHEDSRGTLGAGRMQEDLADAGHSLSLNRVARLMAADGLQGWRPKRRGQQGR--P
ALTlPgvrNRLERDFSALE--PETKWVTDITEIKTQQSKLYLCIVLDFDQRVVGWSM
QHRQDRQMVIRAVQMAVWQ----RQESYEVILHSDRGTQFRSGDYQRYLAANSLVCSM
SAVGHCGDNAACEGFFGLLKREIRYRTSYPTLDAARADVFDYIE"
/note="IS3_IS3_ORF2      e-value= 4.4e-65 fragment hit
coverage= 89.93%, length is 254aa with 8 gaps, 0 stops,

```

```

frame= Plus2"
CDS 3088145..3088963
/colour="255 0 0"
/evidence=predicted
/translation="RCRDEFPVRLMCRCLKVSASGYDWSKRLPSAGQLENQRLLDQI
RALHEDSRGTLGAGRMQEDLADAGHSLSLNRVARLMAADGLQGWP RPKRGGQOGR--P
ALTLPgvrNRLERDFSALE--PETKWVTDITEIKTQOSKLYLCIVLDFDQRVVWWSM
QHRQDRQM VIRAVQMAVWQ----RQESYEVILHSDRGTQFRSGDYQRYLAANSLVCSM
SAVGHCGDNAACEGFFGLLKRERIYRTSYPTLDAARADVFDYIERRHNpRMRRRVA--
-----RQDQKVA"
/note="IS3_IS3_ORF2 e-value= 9.6e-61 complete sequence
hit coverage= 100%, length is 273aa with 19 gaps, 0
stops, frame= Plus2"
CDS 3088166..3088921
/colour="255 0 0"
/evidence=predicted
/translation="VRLMCRCLKVS---ASGYDWSKRLPSAGQLENQRLLDQIRALH
EDSRG-----TLGAGRMQEDLADAGHSLSLNRVARLMAADGLQG--PRPKRRGQOGR
PALTLPgvrNRLERDFSALEPETKWVTDITEIKTQOSKLYLCIVLDFDQRVVWWSMQ
HRQDRQM VIRAVQMAVWQRQES-----YEVILHSDRGTQFRSGDYQRYLAANSLVCSM
SAVGHCGDNAACEGFFGLLKRERIYRTSYPTLDAARADVFDYIERRHNP"
/note="IS3_IS51_ORF2 e-value= 3.9e-65 fragment hit
coverage= 83.28%, length is 252aa with 15 gaps, 0 stops,
frame= Plus2"
CDS 3088184..3088906
/colour="255 0 0"
/evidence=predicted
/translation="CLKVSASGYDWSKRLPSAGQLEnQRLLDQIRALHEDSRGTLGA
GRMQEDLADAGHSLSLNRVARLMAADGLQG-WRPK--RRGQQGRPALTLPgVRNRL
RDFSALEPETKWVTDITEIKT--QOSKLYLCIVLDFDQRVVWWSMQHRQDRQM VIRA
VQMAVWQ-RQESYEVILHSDRGTQFRSGDYQRYLAANSLVCSMSAVGHCGDNAACEGF
FGLLKRERIYRTSYPTLD--AARADVFDYIE"
/note="IS3_IS150_ORF1 e-value= 7.6e-35 fragment hit
coverage= 80.39%, length is 241aa with 8 gaps, 0 stops,
frame= Plus2"
CDS 3595427..3596512
/colour="255 0 0"
/evidence=predicted
/translation="MAAVCSRrcpSVGTASAAAPKADEKDPFVQAA--XGNEPRXAA
QGSRLSACGDRlPKKtRCLDPGRAGGARRKaQAIQGLRQVHTLSLL--LEAAELSRST
FYYQnhvLAHPDQDEAALCERIRAIYdQSQGRYGYRTVTLELANQGHRTNHKRVQRLM
GEMGLKSRVRV-KRYSFKGAANVVVgndlnrqfhaERPNOQW---VTDVTefkVQG
MKLYLSPIMDLNGEIVAYQIKRQPVFDLVGQMLEEAIKK-LSPDerpMIHSDQGWQY
QHENYRHMLEKHSLKQMSRRGNCLDNAAMESFFGTLKSEF--FYLnsFDSIESLEAG
LVEYIQYYNQERIKLKLKGLSPVEYRERAQSAAXPRPSLG"
/note="IS3_IS407_ORF2 e-value= 7.1e-09 complete sequence
hit coverage= 100%, length is 362aa with 12 gaps, 3
stops, frame= Plus2"
CDS 3595433..3596494
/colour="255 0 0"
/evidence=predicted
/translation="AAVCSRRCPS-----VGTASAAAPKAD---EKDPFVQAAAXGN
EPRXAAQGS-----RLSACGD---RLPKKTRCLDPG-----RAGGARRKAQAIQGLR
QVHTLSLLLEAAELSRSTFYYQNHVL--AHPDqDEAALCERIRAIYDQSQGRYGYRTV
TLELA---NQGHRTNHKRVQRLMGEMGLKSRVRVK-RYRSFKGAANVVVGNLNRQFH
AERPNOQKWVTDVTEFKVQ-GMKLYLSPIMDLNGEIVAYQIKRQPVFDLVGQMLEEAI
KKLSPDERPMIHS-----DQGWQYQHENYRHMLEKHSLKQMSRRGNCLDNAAMESFF
GTLKSEFFY--LNSFDSIESLEAGLVEYIQYYNQERIKLKLKGLSPVEYreRAQSAAX
"

```

```

sequence      /note="IS3_IS150_ORF2    e-value= 2.1e-122 complete

hit coverage= 100%, length is 354aa with 38 gaps, 3
stops, frame= Plus2"
CDS           3595586..3596485
              /colour="255 0 0"
              /evidence=predicted
              /translation="LPKKTRCLDPGRAGgARRKAQAIQGLRQVHTLSLLLEAAELSRs
TFYYQNHVLAHPDqDEAALCERIRAIYDQSQGRYGYRTVTLELANQGHRTNHKRVQRL
MGEMGLKSRVRVK---RYRSFKGAANVVVGNDLNRQFHAERPnQKWVTDVTEFKV--Q
GMKLYLSPIMDLYNgeIVAYQIKRQPVFDLVGQMLEEAIKK-LSPDERPMIHSdQGWQ
YQHENYRHMLeKHSLKQMSRRGNCLDNAAMESFFGTLKSEFFYLNSFDSIE--SLEA
GLVEYIQYYNQe-RIKlKlKGLSPVEYrERaQS"
              /note="IS3_IS150_ORF1    e-value= 1.9e-87 complete sequence
hit coverage= 100%, length is 300aa with 9 gaps, 0 stops,
frame= Plus2"
CDS           3595586..3596485
              /colour="255 0 0"
              /evidence=predicted
              /translation="LPKKTRCLDPGRAGgARRKAQAIQGLRQVHTLSLLLEAAELSRs
TFYYQNHVLAHPDqDEAALCERIRAIYDQSQGRYGYRTVTLELANQGHRTNHKRVQRL
MGEMGLKSRVRVK---RYRSFKGAANVVVGNDLNRQFHAERPnQKWVTDVTEFKV--Q
GMKLYLSPIMDLYNgeIVAYQIKRQPVFDLVGQMLEEAIKK-LSPDERPMIHSdQGWQ
YQHENYRHMLeKHSLKQMSRRGNCLDNAAMESFFGTLKSEFFYLNSFDSIE--SLEA
GLVEYIQYYNQe-RIKlKlKGLSPVEYrERaQS"
              /note="IS3_IS150_ORF1    e-value= 4.9e-88 complete sequence
hit coverage= 100%, length is 300aa with 9 gaps, 0 stops,
frame= Plus2"
CDS           3595595..3596530
              /colour="255 0 0"
              /evidence=predicted
              /translation="KTRCLDPGRAGGARRKAQA-----IQGLRQVhTSLlLEAAEL
SRs----TFYYQ-NHVLAHPDQDEAALCERIRAIY-DQsqgRYGY-RTVTLELANQGH
R---TNHKRVQRLMGEMGLKSRVRVKRYRSFKGAANVVVGNDLNRQFHAERPnQKWVt
DVTE-----FKVQg-----MKLYLSPIMDLYNgeIVAYQIKRQPVFD
LVGQMLEEAIKKLSPDERPM--IHSDQGWQYQHE---NYRHMLeKHSLKQMSRRGN
CLDNAAMESFFGTLKSEFFYLNS---FDSIESLEAGLVEYIQYYNQeRIKlKlKGLSP
VeyrERaQSAAXPRPSLGGHFTLG"
              /note="IS481 e-value= 4.9e-06 complete sequence hit
coverage= 100%, length is 312aa with 46 gaps, 1 stops,
frame= Plus2"
CDS           3595634..3596494
              /colour="255 0 0"
              /evidence=predicted
              /translation="RRKAQAIQGLRQVHTLSLLLEAAELSRSTFYyQNHVL--AHPDq
DEAALCERIRAIYDQSQGRYGYRTVTLELA---NQGHRTNHKRVQRLMGEMGLKSRVR
VK-RYRSFKGAANVVVGNDLNRQFHAERPnQKWVTDVTEFKVQ-GMKLYLSPIMDLYN
GEIVAYQIKRQPVFDLVGQMLEEAIKKLSPDERPMIHS-----DQGWQYQHENYRHMLe
KHSLKQMSRRGNCLDNAAMESFFGTLKSEFFY--LNSFDSIESLEAGLVEYIQYYN
QeRIKlKlKGLSPVEYrERaQSAAX"
              /note="IS3_IS150_ORF2    e-value= 2.4e-152 fragment hit
coverage= 76.61%, length is 287aa with 14 gaps, 1 stops,
frame= Plus2"
CDS           3595643..3596515
              /colour="255 0 0"
              /evidence=predicted
              /translation="AQAIQGLRQVHTLSLLLEAAELSRSTFYyQNHVLAHPD-----
QDEAALCERIRAIYDQSQGRYGYRTVTLELANQGHRTNHKRVQRLMGEMGLKSRVRVK
RYRSFKGAANVVVG-NDLNRQFHAERPnQKWVTDVTEFKV-QGmKLYLSPIMDLYNge
IVAYQIKRQPVFDLV-GQMLEEAIKKLSPDE----RPMIHSdQGWQYQHENYRHMLeK

```



HSLKQSMSRRGNCLDNAAMESFFGTLKSEFFYL----NSFDSIESLEAGLVEYIQYYN  
 Q-ERIKLKLKGLSPVEYrERAQSAAXPRPSLGG"  
 /note="IS3\_IS51\_ORF1 e-value= 8.4e-39 complete sequence  
 hit coverage= 100%, length is 291aa with 18 gaps, 1  
 stops, frame= Plus2"  
 CDS 3595643..3596518  
 /colour="255 0 0"  
 /evidence=predicted  
 /translation="---AQAIQGLR-QVHTLSLLLEA--AELSRS-----TFYYQNH  
 VLAHPDQDEAALCERIRAIYDQSOG-----RYGYRTVTLELANQGHRTNHKRVQRLMG  
 EMGLKSRVRVKRYRSFKG-AANVVVGNLNRQFHAERPNOQKVVTDVTEFKVQGMKLYL  
 SPIMDLNGEIVAYQIKRQPVFDLVGQMLEEAIKKLSPD-----ERPMIHSDQGWQYQ  
 HENYRHMLEKHSLKQSMSRRGNCLDNAAMESFFGTLKSEFFYLNSFDSIESLEAGLVE  
 YIQ-YYNQERIKLKLKGLSPVEYRER-AQSAAXPRPSLGGH"  
 /note="IS3\_IS51\_ORF2 e-value= 7.9e-18 complete sequence  
 hit coverage= 100%, length is 292aa with 25 gaps, 1  
 stops, frame= Plus2"  
 CDS 3595646..3596482  
 /colour="255 0 0"  
 /evidence=predicted  
 /translation="QAIQGLRQVHTLSLLLEAAELSRSTFYQNHVLAHPD---QDEA  
 ALCERIRAIYDQSOGRYGYRTVTLELA-NQGHRTNHKRVQRLMGEMGLKSRVRV-KRY  
 RSFKgAANVVVGNLNRQFHAERPNOQKVVTDVTEFKVQGMKLYLSPIMDLNGEIVAY  
 QIKRQPVFDLVGQMLEEAIKKLSPDERP MIHSDQGWQYQHENYRHMLEKHSLKQSMSR  
 RGCLDNAAMESFFGTLK--SEFFYLNSFDSIESLEAGLVEYIQ-YYNQERIKLKLKGL  
 LSPVEYRERAQ"  
 /note="IS3\_IS3\_ORF1 e-value= 2.2e-75 complete sequence  
 hit coverage= 100%, length is 279aa with 8 gaps, 0 stops,  
 frame= Plus2"  
 CDS 3595646..3596482  
 /colour="255 0 0"  
 /evidence=predicted  
 /translation="QAIQGLRQVHTLSLLLEAAELSRSTFYQNHVLAHPD---QDEA  
 ALCERIRAIYDQSOGRYGYRTVTLELA-NQGHRTNHKRVQRLMGEMGLKSRVRV-KRY  
 RSFKgAANVVVGNLNRQFHAERPNOQKVVTDVTEFKVQGMKLYLSPIMDLNGEIVAY  
 QIKRQPVFDLVGQMLEEAIKKLSPDERP MIHSDQGWQYQHENYRHMLEKHSLKQSMSR  
 RGCLDNAAMESFFGTLK--SEFFYLNSFDSIESLEAGLVEYIQ-YYNQERIKLKLKGL  
 LSPVEYRERAQ"  
 /note="IS3\_IS3\_ORF1 e-value= 5.9e-76 complete sequence  
 hit coverage= 100%, length is 279aa with 8 gaps, 0 stops,  
 frame= Plus2"  
 CDS 3595658..3596494  
 /colour="255 0 0"  
 /evidence=predicted  
 /translation="GLRQVHTLSLLLEAAELSRSTFYQNHV-LAHPDQDEAALCERI  
 RAIYDQSOGRYGYRTVTLELANQGHRTNHKRVQRLMGEMGLKSRVRVKRYRSFKGAAN  
 VVVG-NDLNRQFHAER--PNQKVVTDVTEFKVQGMKLYLSPIMDLNGEIVAYQIKRQ  
 PVFDLVGQMLEEAIKK----LSPDERPMIHSQGWQYQHENYRHMLEKHSLKQSMSRR  
 GNCLDNAAMESFFGTLKSEFFYLNSFDSIESLEAGLVEYIQYY-NQERIKLKLKGLSP  
 VEYRERAQSAAX"  
 /note="IS3\_IS3\_ORF2 e-value= 3.9e-64 complete sequence  
 hit coverage= 100%, length is 279aa with 9 gaps, 1 stops,  
 frame= Plus2"  
 CDS 3595658..3596494  
 /colour="255 0 0"  
 /evidence=predicted  
 /translation="GLRQVHTLSLLLEAAELSRSTFYQNHV-LAHPDQDEAALCERI  
 RAIYDQSOGRYGYRTVTLELANQGHRTNHKRVQRLMGEMGLKSRVRVKRYRSFKGAAN  
 VVVG-NDLNRQFHAER--PNQKVVTDVTEFKVQGMKLYLSPIMDLNGEIVAYQIKRQ  
 PVFDLVGQMLEEAIKK----LSPDERPMIHSQGWQYQHENYRHMLEKHSLKQSMSRR

GNCLDNAAMESFFGTLKSEFFYLNSFDSIESLEAGLVEYIQYY-NQERIKLKLKGLSP  
VEYRERAQSAAX"  
/note="IS3\_IS3\_ORF2 e-value= 1.1e-64 complete sequence  
hit coverage= 100%, length is 279aa with 9 gaps, 1 stops,  
frame= Plus2"  
CDS 3595766..3596467  
/colour="255 0 0"  
/evidence=predicted  
/translation="AALCERIRAIYDQSQGRYGYRTVTLELANQGHRTNHKRVQRLMG  
EMGLKSRVRVKRYRSFKGAANVVVG-NDLNRQFHAERPNOQKWVTDVTEFKV-QGmKLY  
LSPIMDLNGEIVAYQIKRQPVFDLV-GOMLEEAIKKLSPDE----RPMIHSQGWQY  
QHENYRHMLEKHSLKQSMSRRGNCLDNAAMESFFGTLKSEFFYL----NSFDSIESLE  
AGLVEYIQYYNQ-ERIKLKLKGLSPVEY"  
/note="IS3\_IS51\_ORF1 e-value= 4.9e-45 fragment hit  
coverage= 79.80%, length is 234aa with 12 gaps, 0 stops,  
frame= Plus2"  
CDS 3595817..3596344  
/colour="255 0 0"  
/evidence=predicted  
/translation="YGYRTVTLELANQGHRTNHKRVQRLMGEMGLKSRVRVKRYRSFK  
G-AANVVVGNDLNRQFHAERPNOQKWVTDVTEFKVQGMKLYLSPIMDLNGEIVAYQIK  
RQPVFDLVGOMLEEAIKKLSPD-----ERPMSIHSQGWQYQHENYRHMLEKHSLKQSM  
SRRGNCLDNAAMESFFGTLKSE"  
/note="IS3\_IS51\_ORF2 e-value= 5.2e-32 fragment hit  
coverage= 57.41%, length is 176aa with 6 gaps, 0 stops,  
frame= Plus2"  
CDS 3596321..3596428  
/colour="255 0 0"  
/evidence=predicted  
/translation="FFGTLKSEFFYLNS---FDSIESLEAGLVEYIQYYNQER"  
/note="IS481 e-value= 3.8e-07 fragment hit coverage=  
11.11%, length is 36aa with 3 gaps, 0 stops, frame=  
Plus2"  
CDS 4365179..4365262  
/colour="255 0 0"  
/evidence=predicted  
/translation="LRRASPSRGPARGHGEDAEVVDALRHL"  
/note="IS3\_IS2\_ORF2 e-value= 9.6e-06 fragment hit  
coverage= 9.27%, length is 28aa with 0 gaps, 0 stops,  
frame= Plus2"  
CDS 1355496..1356572  
/colour="255 0 0"  
/evidence=predicted  
/translation="SXTFVDCLSRTFMEKEDARKQSREVLHERRKQVIRLHRKGVGM  
QIVEQTGLSWGVNTALRLFEOGGAAALKPHARGKKPGSGRSLSTEQERVIRMTIIDK  
RPEQIKMEFALWSRPAVRELIERDLGNKLSVRAVG DYLARWGFTPQKSIKKAY--EQR  
PEAVQAWLEDEYPTIEARAKREGAEIHWGDETALVNTDVRGR-SYAPAG-----  
---QTPVTRAVGGTRQKLSMIATVTNQGK---TRWMIIDEAFNSDRLIEFMQALIKES  
qGKKIFLILDNLRVHHSKPVKEWATQHKQDIELFYLPSYSPELNPEERLNADLKHAIG  
SKVPVRTKAKLRAAATEHMTMLENTPERVKKYFGDKHVAYAAS"  
/note="IS630 e-value= 2.1e-108 complete sequence hit  
coverage= 100%, length is 359aa with 18 gaps, 1 stops,  
frame= Plus3"  
CDS 1355532..1356572  
/colour="255 0 0"  
/evidence=predicted  
/translation="MEKEDARKQSREVLHERRKQVIRLHRKGVGMQIVEQTGLSWG  
VNTALRLFEOGGAAALKPHARGKKPGSGRSLSTEQERVIRMTIIDKRPEQIKMEFALW  
SRPAVRELIERDLGNKLSVRAVG DYLARWGFTPQKSIKKAY--EQRPEAVQAWLEDEY  
PTIEARAKREGAEIHWGDETALVNTDVRGR-SYAPAG-----QTPVTRAVG

GTRQKLSMIATVTNQGK---TRWMIIDEAFNSDRLIEFMQALIKESqGKKIFLILDNL  
RVHHSKPVKEWATQHQQDIELFYLPSPYSELNPEERLNADLKHAIGSKVPVRTKAKLR  
AAATEHMTMLENTPERVKKYFGDKHVAYAAS"  
/note="IS630 e-value= 7.9e-108 fragment hit coverage=  
96.81%, length is 347aa with 18 gaps, 0 stops, frame=  
Plus3"

CDS 2334351..2335400  
/colour="255 0 0"  
/evidence=predicted  
/translation="----SRRCPs-----VGTASAAAPKAD---EKDPFVQAAXGN  
EPRXAAQGS-----RLSACGD---RLPKKTRCLDPG-----RAGGARRKAQAIQGLR  
QVHTLSLLLEAAELSRSTFYQNHVL--AHPDQDEAALCERIRAIYDQSQGRYGYRTV  
TLELA---NQGHRTNHKRVQRLMGEMGLKSRVRVK--RYRSFKGAANVVVGNLNRQFH  
AERPNOQKWVTDVTEFKVQ--GMKLYLSPIMDLNGEIVAYQIKRQPVFDLVGQMLEEAI  
MKLSPDERPMIHS-----DQGWQYQHENYRHMLEKHSKQSMSRRGNCLDNAAMESFF  
GTLKSEFFY--LNSFDSIESLEAGLVEYIQYYNQERIKLKLKGLSPVEYrERAQSAAX  
"

/note="IS3\_IS150\_ORF2 e-value= 5e-121 complete sequence  
hit coverage= 100%, length is 350aa with 42 gaps, 3  
stops, frame= Plus3"

CDS 2334363..2335418  
/colour="255 0 0"  
/evidence=predicted  
/translation="-----PSVGTASAAAPKADEKDPFVQAA--XGNEPRXAAQGS  
RLSACGDRlPKKtRCLDPGRAGGARRKaQAIQGLRQVHTLSLL--LEAAELSRSTFYQ  
QnhvLAHPDQDEAALCERIRAIYDQSQGRYGYRTVTLELANQGHRTNHKRVQRLMGEM  
GLKSRVRV--KRYRSFKGAANVVVgndlnrqfhaERPNOQKW----VTDVTEfkVQGMKL  
YLSPIMDLNGEIVAYQIKRQPVFDLVGQMLEEAIMK--LSPDERPMIHSQGWQYQHE  
NYRHMLEKHSKQSMSRRGNCLDNAAMESFFGTLKSEF--FYLnsFDSIESLEAGLVE  
YIQYYNQERIKLKLKGLSPVEYRERERAQSAAXPRPSLG"

/note="IS3\_IS407\_ORF2 e-value= 9.5e-09 complete sequence  
hit coverage= 100%, length is 352aa with 19 gaps, 3  
stops, frame= Plus3"

CDS 2334492..2335391  
/colour="255 0 0"  
/evidence=predicted  
/translation="LPKKTRCLDPGRAggARRKAQAIQGLRQVHTLSLLLEAAELSRs  
TFYQNHVLAHPDQDEAALCERIRAIYDQSQGRYGYRTVTLELANQGHRTNHKRVQRL  
MGEMGLKSRVRVK---RYRSFKGAANVVVGNLNRQFHAERPNOQKWVTDVTEFKV--Q  
GMKLYLSPIMDLNGEIVAYQIKRQPVFDLVGQMLEEAIMK--LSPDERPMIHSQGWQ  
YQHENYRHMLEKHSKQSMSRRGNCLDNAAMESFFGTLKSEFFYLNSFDSIE--SLEA  
GLVEYIQYYNQE-RIKLLKGLSPVEYRERERAQs"

/note="IS3\_IS150\_ORF1 e-value= 1.2e-86 complete sequence  
hit coverage= 100%, length is 300aa with 9 gaps, 0 stops,  
frame= Plus3"

CDS 2334492..2335391  
/colour="255 0 0"  
/evidence=predicted  
/translation="LPKKTRCLDPGRAggARRKAQAIQGLRQVHTLSLLLEAAELSRs  
TFYQNHVLAHPDQDEAALCERIRAIYDQSQGRYGYRTVTLELANQGHRTNHKRVQRL  
MGEMGLKSRVRVK---RYRSFKGAANVVVGNLNRQFHAERPNOQKWVTDVTEFKV--Q  
GMKLYLSPIMDLNGEIVAYQIKRQPVFDLVGQMLEEAIMK--LSPDERPMIHSQGWQ  
YQHENYRHMLEKHSKQSMSRRGNCLDNAAMESFFGTLKSEFFYLNSFDSIE--SLEA  
GLVEYIQYYNQE-RIKLLKGLSPVEYRERERAQs"

/note="IS3\_IS150\_ORF1 e-value= 3.2e-87 complete sequence  
hit coverage= 100%, length is 300aa with 9 gaps, 0 stops,  
frame= Plus3"

CDS 2334501..2335436  
/colour="255 0 0"  
/evidence=predicted

```

/translation="KTRCLDPGRAGGARRKAQA-----IQGLRQVhTSLSLLEAAEL
SRS----TFYYQ-NHVLAHPDQDEAALCERIRAIY-DQsqgRYGY-RTVTLELANOGH
R---TNHKRVQRLMGEMGLKSRVRVKRYRSFKGAANVVVGNDLNRQFHAERPNOQKVV
DVTE-----FKVQG-----MKLYLSPIMDLNGEIVAYQIKRQPVFD
LVGQMLEEAIMKLSPPERPM--IHSDQGWQYQHE----NYRHMLEKHSKQSMSRRGN
CLDNAAMESFFGTLKSEFFYLS---FDSIESLEAGLVEYIQYYNQERIKLKLKGLSP
VeyrERAQSAAXPRPSLGGHFTLG"
/note="IS481 e-value= 5e-06 complete sequence hit
coverage= 100%, length is 312aa with 46 gaps, 1 stops,
frame= Plus3"
CDS 2334540..2335400
/colour="255 0 0"
/evidence=predicted
/translation="RRKAQAIQGLRQVHTLSLLEAAELSRSTFYQNHVL--AHPDq
DEAALCERIRAIYDQSQGRYGYRTVTLELA---NOGHRTNHKRVQRLMGEMGLKSRVR
VK-RYRSFKGAANVVVGNDLNRQFHAERPNOQKVVTDVTEFKVQ-GMKLYLSPIMDLN
GEIVAYQIKRQPVFDLVGQMLEEAIMKLSPPERPMIHS-----DQGWQYQHENYRHM
EKHSLKQSMSRRGNCLDNAAMESFFGTLKSEFFY--LNSFDSIESLEAGLVEYIQYYN
QERIKLKLKGLSPVEYrERAQSAAX"
/note="IS3_IS150_ORF2 e-value= 1.9e-151 fragment hit
coverage= 76.61%, length is 287aa with 14 gaps, 1 stops,
frame= Plus3"
CDS 2334549..2335421
/colour="255 0 0"
/evidence=predicted
/translation="AQAIQGLRQVHTLSLLEAAELSRSTFYQNHVLAHPD-----
QDEAALCERIRAIYDQSQGRYGYRTVTLELANOGHRTNHKRVQRLMGEMGLKSRVRVK
RYRSFKGAANVVVG-NDLNRQFHAERPNOQKVVTDVTEFKV-QGmKLYLSPIMDLN
GEIVAYQIKRQPVFDLV-GQMLEEAIMKLSPE----RPMIHSQGWQYQHENYRHM
EKHSLKQSMSRRGNCLDNAAMESFFGTLKSEFFY----NSFDSIESLEAGLVEYIQYYN
Q-ERIKLKLKGLSPVEYrERAQSAAXPRPSLGG"
/note="IS3_IS51_ORF1 e-value= 8.5e-39 complete sequence
hit coverage= 100%, length is 291aa with 18 gaps, 1
stops, frame= Plus3"
CDS 2334549..2335424
/colour="255 0 0"
/evidence=predicted
/translation="---AQAIQGLR-QVHTLSLLEA--AELSRS-----TFYYQNH
VLAHPDQDEAALCERIRAIYDQSQG-----RYGYRTVTLELANOGHRTNHKRVQRLMG
EMGLKSRVRVKRYRSFKG-AANVVVGNDLNRQFHAERPNOQKVVTDVTEFKVQGMKLYL
SPIMDLNGEIVAYQIKRQPVFDLVGQMLEEAIMKLSPE-----ERPMSIHSQGWQYQ
HENYRHMLEKHSKQSMSRRGNCLDNAAMESFFGTLKSEFFYLSNSFDSIESLEAGLVE
YIQ-YYNQERIKLKLKGLSPVEYRER-AQSAAXPRPSLGGH"
/note="IS3_IS51_ORF2 e-value= 1.2e-17 complete sequence
hit coverage= 100%, length is 292aa with 25 gaps, 1
stops, frame= Plus3"
CDS 2334552..2335388
/colour="255 0 0"
/evidence=predicted
/translation="QAIQGLRQVHTLSLLEAAELSRSTFYQNHVLAHPD---QDEA
ALCERIRAIYDQSQGRYGYRTVTLELA-NOGHRTNHKRVQRLMGEMGLKSRVRV-KRY
RSFKgAANVVVGNDLNRQFHAERPNOQKVVTDVTEFKVQGMKLYLSPIMDLNGEIVAY
QIKRQPVFDLVGQMLEEAIMKLSPPERPMIHSQGWQYQHENYRHMLEKHSKQSMSR
RGNCLDNAAMESFFGTLK--SEFFYLSNSFDSIESLEAGLVEYIQ-YYNQERIKLKLK
LSPVEYRERAQ"
/note="IS3_IS3_ORF1 e-value= 1.8e-74 complete sequence
hit coverage= 100%, length is 279aa with 8 gaps, 0 stops,
frame= Plus3"
CDS 2334552..2335388
/colour="255 0 0"

```

```

/evidence=predicted
/translation="QAIQGLRQVHTLSLLLEAAELSRSTFYQNHVLAHPD---QDEA
ALCERIRAIYDQSQGRYGYRTVTLELA-NQGHRTNHKRVQRLMGEMGLKSRVRV-KRY
RSFKgAANVVVGNDLNRQFHAERPNOQKWVTDVTEFKVQGMKLYLSPIMDLNGEIVAY
QIKRQPVFDLVGQMLEEAIMKLSPPERPMIHSQGWQYQHENYRHMLEKHSKQSMSR
RGNCLDNAAMESFFGTLK--SEFFYLNSFDSIESLEAGLVEYIQ-YYNQERIKLKLKG
LSPVEYRERAQ"
/note="IS3_IS3_ORF1      e-value= 4.6e-75 complete sequence
hit coverage= 100%, length is 279aa with 8 gaps, 0 stops,
frame= Plus3"
CDS      2334564..2335400
/colour="255 0 0"
/evidence=predicted
/translation="GLRQVHTLSLLLEAAELSRSTFYQNHV-LAHPDQDEAALCERI
RAIYDQSQGRYGYRTVTLELANQGHRTNHKRVQRLMGEMGLKSRVRVKRYRSFKGAAN
VVVG-NDLNRQFHAER--PNQKWVTDVTEFKVQGMKLYLSPIMDLNGEIVAYQIKRQ
PVFDLVGQMLEEAIMK----LSPDERPMIHSQGWQYQHENYRHMLEKHSKQSMSRR
GNCLDNAAMESFFGTLKSEFFYLNSFDSIESLEAGLVEYIQYY-NQERIKLKLKGLSP
VEYRERAQSAAX"
/note="IS3_IS3_ORF2      e-value= 1.2e-63 complete sequence
hit coverage= 100%, length is 279aa with 9 gaps, 1 stops,
frame= Plus3"
CDS      2334564..2335400
/colour="255 0 0"
/evidence=predicted
/translation="GLRQVHTLSLLLEAAELSRSTFYQNHV-LAHPDQDEAALCERI
RAIYDQSQGRYGYRTVTLELANQGHRTNHKRVQRLMGEMGLKSRVRVKRYRSFKGAAN
VVVG-NDLNRQFHAER--PNQKWVTDVTEFKVQGMKLYLSPIMDLNGEIVAYQIKRQ
PVFDLVGQMLEEAIMK----LSPDERPMIHSQGWQYQHENYRHMLEKHSKQSMSRR
GNCLDNAAMESFFGTLKSEFFYLNSFDSIESLEAGLVEYIQYY-NQERIKLKLKGLSP
VEYRERAQSAAX"
/note="IS3_IS3_ORF2      e-value= 3.3e-64 complete sequence
hit coverage= 100%, length is 279aa with 9 gaps, 1 stops,
frame= Plus3"
CDS      2334672..2335373
/colour="255 0 0"
/evidence=predicted
/translation="AALCERIRAIYDQSQGRYGYRTVTLELANQGHRTNHKRVQRLMG
EMGLKSRVRVKRYRSFKGAANVVVG-NDLNRQFHAERPNOQKWVTDVTEFKV-QGmKLY
LSPIMDLNGEIVAYQIKRQPVFDLV-GQMLEEAIMKLSPE----RPMIHSQGWQY
QHENYRHMLEKHSKQSMSRRGNCLDNAAMESFFGTLKSEFFYL----NSFDSIESLE
AGLVEYIQYYNQ-ERIKLKLKGLSPVEY"
/note="IS3_IS51_ORF1     e-value= 5e-45 fragment hit
coverage= 79.80%, length is 234aa with 12 gaps, 0 stops,
frame= Plus3"
CDS      2334723..2335250
/colour="255 0 0"
/evidence=predicted
/translation="YGYRTVTLELANQGHRTNHKRVQRLMGEMGLKSRVRVKRYRSFK
G-AANVVVGNDLNRQFHAERPNOQKWVTDVTEFKVQGMKLYLSPIMDLNGEIVAYQIK
RQPVFDLVGQMLEEAIMKLSPE-----ERPmiHSQGWQYQHENYRHMLEKHSKQSM
SRRGNCLDNAAMESFFGTLKSE"
/note="IS3_IS51_ORF2     e-value= 7.8e-32 fragment hit
coverage= 57.41%, length is 176aa with 6 gaps, 0 stops,
frame= Plus3"
CDS      2335227..2335334
/colour="255 0 0"
/evidence=predicted
/translation="FFGTLKSEFFYLNS---FDSIESLEAGLVEYIQYYNQER"
/note="IS481 e-value= 3.8e-07 fragment hit coverage=

```

```

11.11%, length is 36aa with 3 gaps, 0 stops, frame=
Plus3"
CDS 4666605..4666814
/colour="255 0 0"
/evidence=predicted
/translation="RLTFGDAQGLGKRKQTRREILLYEVDXVVPWKALPARIEPHYP-
RSGRVGRSPYAMETMLRIHLLQQXYAF"
/note="IS5_IS5 e-value= 2.4e-24 fragment hit coverage=
16.82%, length is 70aa with 1 gaps, 2 stops, frame=
Plus3"
CDS 4666605..4667441
/colour="255 0 0"
/evidence=predicted
/translation="RLTFGDAQGLGKRKQTRREILLYEVDXVVPWKALPARIEPHYP-
RSGRVGRSPYAMETMLRIHLLQQXYAFEQFGHVASVARdxfaavRTAHQSFSGQDAL
HN-----SRGLHAKRREESXRLLSincrietNTDLASLQESAAA-----AAA
AQAASLQSN-----HF-----
DACSSRIRSRLTSTRLAITMTTAP-----MNKNGKVRPSAVAATI
ARQHTQ-----MAKVFLIPWILTNFLMPATSGNIFF--QXGHEGSPPR-----R
GAMVALLLRXVEERNASVAASFLLV-IQSLLRKRHSRHPVRR"
/note="IS5_IS5 e-value= 2.5e-06 complete sequence hit
coverage= 100%, length is 279aa with 155 gaps, 5 stops,
frame= Plus3"
CDS complement(3988994..3988837)
/colour="255 0 0"
/evidence=predicted
/translation="PEPTRTIFRLNRLQGLTQAEIARRLGVSVTTVENHVRTA-LQRL
AWARSG-----RXSP"
/note="IS21_ORF1 e-value= 5e-06 fragment hit coverage=
11.62%, length is 53aa with 8 gaps, 1 stops, frame=
Minus1"
CDS complement(2520995..2519887)
/colour="255 0 0"
/evidence=predicted
/translation="VQDRGGPT-----DRXVRPSGSGGCRAgRVDPXSLRLEAATR
QRRCPACRAGPERGS-APPQGXATQGHXRARHPKKSRRVL---CKGVRAKYAFMKQH
ADEFGLAAMCRMLGVHRSGYYAWLKEPASARDKDDQRLGLIKHSWLESGSVYGHRKV
TTDLR---ELGETCSRHRVARLMKSEGLRAMVGYGRRPRPLSGPVGSVAKNVLARGFK
VSEPNRAWVTDITYIRTY-DGFLYLAVVLDLFSRQVVGWATRPTQHTDLVLQALLAAV
WRRKPSPELLLS-----DQGTQFTSEDWQSFLEHHDIVCSMSRRGNCHDNAAMESFF
QLLKRERIK--RRIYSNHDEARADVFOYIEMfYNPKRRHSSNDGLSPVEFEKQYALN"
/note="IS3_IS150_ORF2 e-value= 1.2e-45 complete sequence
hit coverage= 100%, length is 370aa with 21 gaps, 4
stops, frame= Minus1"
CDS complement(2520797..2519854)
/colour="255 0 0"
/evidence=predicted
/translation="RARHPKKSRRVLCKGVRAKYAFMKQHADEFGLAAMC--RMLGVH
RS-GYYAWLKE---PASARDKDDQRLGLIKHSWLESGSVYGHRKVTTLRELGET--
-CRHRVARLMKSEGLRAMVGYGRRPRPLSGPVGSVAKNvLARGFKVSEPNRAWVTDI
TYI-----RT-----YDGFLYLAVVLDLFSRqVVGWATRPTQHTDLV
LQALLAAVWRRKPSPLG-L--LHSDQGTQFTSE----DWQSFLEHHDIVCSMSRRGNC
HDNAAMESFFQLLKRERIKRRI---YSNHDEARADVFOYIEMfYNPKRRHSSNDGLSP
VEFEKQYALNGXRLSRKPWAI"
/note="IS481 e-value= 4.4e-07 complete sequence hit
coverage= 100%, length is 315aa with 40 gaps, 1 stops,
frame= Minus1"
CDS complement(2520794..2519890)
/colour="255 0 0"

```

```

/evidence=predicted
/translation="ARHPKKSRRVLCKgVRAKYAFMKQHADEFGLAAMCRMLGVHRSg
YYAWLKePASARDKDDQRLGLIKHSWLESGSVYGHRKVTDLRELGETCSRHRVARL
MKSEGLRAMVGYGR--RPRPLSGPVGSVAKNVLARGFKVSEPNRAWVTDITYIRT--Y
DGFLYLAVVLDLFSRQVVGWATRPTQHTDLVLQALLAAVWR-RKPSPGLLLHSDQGTQ
FTSEDWQSFLREHDIVCSMSRRGNCHDNAAMESFFQLLKRERIKRRIYSNH--EARA
DVFQYIEMFYNPKRHRSSNDGLSPVEFEKQYAL"
/note="IS3_IS150_ORF1 e-value= 1.4e-57 complete sequence
hit coverage= 100%, length is 302aa with 7 gaps, 0 stops,
frame= Minus1"
CDS complement(2520770..2519878)
/colour="255 0 0"
/evidence=predicted
/translation="RVLCKGVRAKYAFMkqhADEFGLAAMCRMLGVHRSGYYAWLK--
----EPASARDKDDQRLGLIKHSWLESGSVYGHRKVTDLRELGETCSR----HRV
ARLMkseGLRAMVgYGRPRPLSGP---VGSVAknvlargfkVSEPNRAWVTDITYIR
TYDG-FLYLAVVLDLFSRQVVGWATRPTQ--HTDLVLQALLAAVWRR----KPSPLL
LH-SDQGTQFTSEDWQSFLREHDIVCSMSRRGNCHDNAAMESFFQLLKRERIkrRIYS
NHDEARA--DVFQYIEMFYNPKRHRSSNDGLSPVEFEKQYALNGXR"
/note="IS3_IS2_ORF2 e-value= 1.4e-07 complete sequence
hit coverage= 100%, length is 298aa with 24 gaps, 1
stops, frame= Minus1"
CDS complement(2520767..2519890)
/colour="255 0 0"
/evidence=predicted
/translation="VLCKgVRAKYAFMKQHADEFGLAAMCRMLGVHRSgYYAWLKePA
SARDKDDQRLGLIKHSWLESGSVYGHRKVTDLRELGETCSRHRVARLMKSEGLRAM
VGYGR--RPRPLSGPVGSVAKNVLARGFKVSEPNRAWVTDITYIRT--YDGFLYLAVV
LDLFSRQVVGWATRPTQHTDLVLQALLAAVWR-RKPSPGLLLHSDQGTQFTSEDWQSF
LREHDIVCSMSRRGNCHDNAAMESFFQLLKRERIKRRIYSNH--EARADVFQYIEMF
YNPKRRHSSNDGLSPVEFEKQYAL"
/note="IS3_IS150_ORF1 e-value= 5.1e-57 fragment hit
coverage= 97.06%, length is 293aa with 7 gaps, 0 stops,
frame= Minus1"
CDS complement(2520758..2519842)
/colour="255 0 0"
/evidence=predicted
/translation="KGVRAKYAFMKQHAD--EFGLAAMCRMLGVH---RSGYYAWLKE
PASARDKDDQRLGLIKHSWLESGS-----VYGHRKVTDLRELGETCSRHRVARLMK
SEGLRAMVGYGRPRPLSGPVGSVAKNVLARGFKVSEPNRAWVTDITYIRTYDGFLYL
AVVLDLFSRQVVGWATRPTQHTDLVLQALLAAVWRRKPS-----PGLLLHSDQGTQFT
SEDWQSFLREHDIVCSMSRRGNCHDNAAMESFFQLLKRERIKRRIYSNHDEARADVFQ
YIEMFYNPKRHRSSNDGLSPVEFEKQYALNGxrlsRKWPWAIQTDN"
/note="IS3_IS51_ORF2 e-value= 4.4e-135 complete
sequence hit coverage= 100%, length is 306aa with 15 gaps, 0
stops, frame= Minus1"
CDS complement(2520740..2519896)
/colour="255 0 0"
/evidence=predicted
/translation="YAFMKQHADEFGLAAMCRMLGVHRSGYYAWL-----KEPASARD
KDDQRLGLIKHSWLESGSVYGHRKVTDLRELGETCSRHRVARLMKSEGLRAMVGYG
RRPRPLSGPVGSVAKNVLARGFKVSEPNRAWVTDITYIRTYDGFLYLAVVLDLFSRQV
VGWATRPTQHTDLV-LQALLAAVWRRKPS----GLLLHSDQGTQFTSEDWQSFLREH
DIVCSMSRRGNCHDNAAMESFFQLLKRERIKR----RIYSNHDEARADVFQYIEMFYN
PKRRHSSNDGLSPVEFEKQY"
/note="IS3_IS51_ORF1 e-value= 3.9e-110 fragment hit
coverage= 96.42%, length is 282aa with 14 gaps, 0 stops,
frame= Minus1"
CDS complement(2520740..2519863)

```

```

/colour="255 0 0"
/evidence=predicted
/translation="YAFMKQHAEDEFGLAAMCRMLGVHRSGYYAWL-----KEPASARD
KDDQRLGLIKHSWLESGSVYGHRKVTDLRELGETCSRHRVARLMKSEGLRAMVGYG
RRPRPLSGPVGSVAKNVLARGFKVSEPNRAWVTDITYIRTYDGFYLA VVLDLFSRQV
VGWATRPTQHTDLV-LQALLAAVWRRKPS-----GLLLHSDQGTQFTSEDWQSFLREH
DIVCSMSRRGNCHDNAAMESFFQLLKREIKR----RIYSNHDEARADVFOYIEMFYN
PKRRHSSNDGLSPVEFEKQYALNGXRLSRKP"
/note="IS3_IS51_ORF1      e-value= 3.7e-108 complete
sequence
hit coverage= 100%, length is 293aa with 14 gaps, 1
stops, frame= Minus1"
CDS      complement(2520737..2519893)
/colour="255 0 0"
/evidence=predicted
/translation="AFMKQHAEDEFGLAAMCRMLGVHRSGYYAWLKE--PASARDKDDQ
RLGLIKHSWLESGSVYGHRKVTDLR-ELGETCSRHRVARLMKSEGLRAMVGYG-RR
PRPLSgPVGSVAKNVLARGFKVSEPNRAWVTDITYIRTYDGFYLA VVLDLFSRQVVG
WATRPTQHTDLV LQALLAAVWRRKPSG LLLHSDQGTQFTSEDWQSFLREHDIVCSMS
RRGNCHDNAAMESFFQLLK--RERIKRRIYSNHDEARADVFOYIEMFYNPKRRHSSND
GLSPVEFEKQYA"
/note="IS3_IS3_ORF1      e-value= 1.9e-94 complete sequence
hit coverage= 100%, length is 282aa with 6 gaps, 0 stops,
frame= Minus1"
CDS      complement(2520737..2519893)
/colour="255 0 0"
/evidence=predicted
/translation="AFMKQHAEDEFGLAAMCRMLGVHRSGYYAWLKE--PASARDKDDQ
RLGLIKHSWLESGSVYGHRKVTDLR-ELGETCSRHRVARLMKSEGLRAMVGYG-RR
PRPLSgPVGSVAKNVLARGFKVSEPNRAWVTDITYIRTYDGFYLA VVLDLFSRQVVG
WATRPTQHTDLV LQALLAAVWRRKPSG LLLHSDQGTQFTSEDWQSFLREHDIVCSMS
RRGNCHDNAAMESFFQLLK--RERIKRRIYSNHDEARADVFOYIEMFYNPKRRHSSND
GLSPVEFEKQYA"
/note="IS3_IS3_ORF1      e-value= 4.9e-95 complete sequence
hit coverage= 100%, length is 282aa with 6 gaps, 0 stops,
frame= Minus1"
CDS      complement(2520725..2519881)
/colour="255 0 0"
/evidence=predicted
/translation="QHAEDEFGLAAMCRMLGVHRSGYYAWLKEPASARDKDDQRLGLI
KHSWLESGSVYGHRKVTDLRELGETCSRHRVARLMKSEGLRAMvGYGRRPRPLSGPV
GSVAK-NVLARGFKVSE--PNRAWVTDITYIRTYDGFYLA VVLDLFSRQVVGWATR
PQHTDLV LQALLAAVWR----RKPSG LLLHSDQGTQFTSEDWQSFLREHDIVCSMSR
RGNCHDNAAMESFFQLLKREIKRRIYSNHDEARADVFOYIEMFYNPKRRHSSNDGLS
PVEFEKQYALNGX"
/note="IS3_IS3_ORF2      e-value= 7.1e-102 complete
sequence
hit coverage= 100%, length is 282aa with 7 gaps, 1 stops,
frame= Minus1"
CDS      complement(2520725..2519881)
/colour="255 0 0"
/evidence=predicted
/translation="QHAEDEFGLAAMCRMLGVHRSGYYAWLKEPASARDKDDQRLGLI
KHSWLESGSVYGHRKVTDLRELGETCSRHRVARLMKSEGLRAMvGYGRRPRPLSGPV
GSVAK-NVLARGFKVSE--PNRAWVTDITYIRTYDGFYLA VVLDLFSRQVVGWATR
PQHTDLV LQALLAAVWR----RKPSG LLLHSDQGTQFTSEDWQSFLREHDIVCSMSR
RGNCHDNAAMESFFQLLKREIKRRIYSNHDEARADVFOYIEMFYNPKRRHSSNDGLS
PVEFEKQYALNGX"
/note="IS3_IS3_ORF2      e-value= 2e-102 complete sequence
hit

```



```

coverage= 100%, length is 282aa with 7 gaps, 1 stops,
frame= Minus1"
CDS complement(2520713..2519887)
/colour="255 0 0"
/evidence=predicted
/translation="EFGLAAMCRMLGVHRSGYYAWLKEPASARDKDDQRLGLIKHSW
LESGSVYGHRKVTDLR---ELGETCSRHRVARLMKSEGLRAMVGYGRRPRPLSGPVG
SVAKNVLARGFKVSEPNRAVVDITYIRTY-DGFLYLAVVLDLFSRQVVGWATRPTQH
TDLVLQALLAAVWRRKPSPGLLLHS-----DQGTQFTSEDWQSFLREHDIVCSMSRRG
NCHDNAAMESFFQLLKRERIK--RRIYSNHDEARADVFOYIEMFYNPKRRHSSNDGLS
PVEFEKQYALN"
/note="IS3_IS150_ORF2 e-value= 1.9e-74 fragment hit
coverage= 73.52%, length is 276aa with 11 gaps, 0 stops,
frame= Minus1"
CDS complement(2520710..2519893)
/colour="255 0 0"
/evidence=predicted
/translation="FGLAAMCRMLGVH---RSGYYAWLKEPASARDKDDQRLGLIKH
SWLESGS-----VYGHRKVTDLRELGETCSRHRVARLMKSEGLRAMVGYGRRPRPLS
GPVGSVAKNVLARGFKVSEPNRAVVDITYIRTYDGFLYLAVVLDLFSRQVVGWATRP
TQHTDLVLQALLAAVWRRKPS-----PGLLLHSDQGTQFTSEDWQSFLREHDIVCSMS
RRGNCHDNAAMESFFQLLKRERIKRRIYSNHDEARADVFOYIEMFYNPKRRHSSNDGL
SPVEFEKQYA"
/note="IS3_IS51_ORF2 e-value= 7.1e-152 fragment hit
coverage= 90.22%, length is 273aa with 13 gaps, 0 stops,
frame= Minus1"
CDS complement(2443193..2442061)
/colour="255 0 0"
/evidence=predicted
/translation="LCTGARRVAXPGFPFHCASNPSSSRGQGDPLIVSLHRHAPDK-
---AHTEGX-KRVRLAIPETYRTRAVR---QEGLVRSSHTKIRIPKksrgvlrqgMTA
KYAFMREHLGEFRLTAMCRVLGVNRSYYAWAGNS--GRPRRREddrLRGLIKHAWLA
SGTVYGYRKITRELR---EAGERCSRHRVRLMKAEGIRAEIGYGTKPRHRGGPPGMV
-ENVVNRDFSPAAPNKVWVTDITYIRTY-EGWTF LAVIVDLYSRQVVGWAMQSQMTTD
LVLQALVSAVWKRKPAAGLIIHS-----DQGSQFTSSDWLSLLKQNGMVPMSRRGNC
HDNAVAESFFSALKKERIK--RRIYPTRDEARSDVFNYIEMFYNPIRRHGSAGNLAPV
EF-ERRYAQ"
/note="IS3_IS150_ORF2 e-value= 1.2e-42 complete sequence
hit coverage= 100%, length is 378aa with 23 gaps, 2
stops, frame= Minus1"
CDS complement(2442968..2442064)
/colour="255 0 0"
/evidence=predicted
/translation="TKIRIPKKSrgVLRQgMTAKYAFMREHLGEFRLTAMCRVLGVNR
SgYYAWAGNSGRPRRREDDRLRGLIKHAWLASGTVYGYRKITRELREAGERCSRHRVR
RLMKAEGIRAEIGYGT--KPRHRGGPPGMVENVNRDFSPAAPNKVWVTDITYIRT-
-YEGWTF LAVIVDLYSRQVVGWAMQSQMTDLVLQALVSAVWK-RKPAAGLIIHSDQG
SQFTSSDWLSLLKQNGMVPMSRRGNCHDNAVAESFFSALKKERIKRRIYPTRD--EA
RSDVFNYIEMFYNPIRRHGSAGNLAPVEF-ERRYA"
/note="IS3_IS150_ORF1 e-value= 2.9e-46 complete sequence
hit coverage= 100%, length is 302aa with 9 gaps, 0 stops,
frame= Minus1"
CDS complement(2442926..2442025)
/colour="255 0 0"
/evidence=predicted
/translation="QGMTAKYAFMREHLGEFR--LTAMCRVLGVN---RSGYYAWAGN
SGRPRRREDDRLRGLIKHAWLASGT-----VGYRKITRELREAGERCSRHRVRLMK
AEGIRAEIGYGTKPRHRGGPPGMV-ENVVNRDFSPAAPNKVWVTDITYIRTYEGWTF
AVIVDLYSRQVVGWAMQSQMTDLVLQALVSAVWKRKPA-----AGLIIHSDQGSQFT
SSDWLSLLKQNGMVPMSRRGNCHDNAVAESFFSALKKERIKRRIYPTRDEARSDVF

```

```

YIEMFYNPIRRHGSAGNLAPVEFERRYAQGGSMSTEVWPV"
/note="IS3_IS51_ORF2      e-value= 9.2e-135 complete
sequence

hit coverage= 100%, length is 301aa with 16 gaps, 1
stops, frame= Minus1"
CDS      complement(2442908..2442037)
/colour="255 0 0"
/evidence=predicted
/translation="YAFMREHLGEFRLTAMCRVLGVNRSGYAWA---GNSGRPRRRE
--DDRRLRGLIKHAWLASGTVYGYRKITRELREAGERCSRHRVRRMLKAEGIRAEIGYG
TKPRHRGGPPGMVE-NVVNRDFSPAAPNKVWVTDITYIRTYEGWTF LAVIVDLYSRQV
VGWAMQSQMTTDLV-LQALVSAVWKRKPAA----GLIIHSDQGSQFTSSDWLSLLKQN
GMVPSMSRRGNCHDNAVAESFFSALKKERIKR----RIYPTRDEARSDVFNYYIEMFYN
PIRRHGSAGNLAPVEFERRY-AQGGSMSTE"
/note="IS3_IS51_ORF1      e-value= 1.2e-109 complete
sequence

hit coverage= 100%, length is 291aa with 16 gaps, 1
stops, frame= Minus1"
CDS      complement(2442908..2442037)
/colour="255 0 0"
/evidence=predicted
/translation="YAFMREHLGEFRLTAMCRVLGVNRSGYAWA---GNSGRPRRRE
--DDRRLRGLIKHAWLASGTVYGYRKITRELREAGERCSRHRVRRMLKAEGIRAEIGYG
TKPRHRGGPPGMVE-NVVNRDFSPAAPNKVWVTDITYIRTYEGWTF LAVIVDLYSRQV
VGWAMQSQMTTDLV-LQALVSAVWKRKPAA----GLIIHSDQGSQFTSSDWLSLLKQN
GMVPSMSRRGNCHDNAVAESFFSALKKERIKR----RIYPTRDEARSDVFNYYIEMFYN
PIRRHGSAGNLAPVEFERRY-AQGGSMSTE"
/note="IS3_IS51_ORF1      e-value= 1.3e-108 complete
sequence

hit coverage= 100%, length is 291aa with 16 gaps, 1
stops, frame= Minus1"
CDS      complement(2442905..2442064)
/colour="255 0 0"
/evidence=predicted
/translation="AFMREHLGEFRLTAMCRVLGVNRSGYAWAGN--SGRPRRREDD
RLRGLIKHAWLASGTVYGYRKITREL R-EAGERCSRHRVRRMLKAEGIRAEIGYG---
-TKPRHRGgPpgMVENVVNRDFSPAAPNKVWVTDITYIRTYEGWTF LAVIVDLYSRQV
VGWAMQSQMTTDLVLQALVSAVWKRKPAAGLI IHSDQGSQFTSSDWLSLLKQNGMVPS
MSRRGNCHDNAVAESFFSALK--KERIKRRIYPTRDEARSDVFNYYIEMFYNPIRRHGS
AGNLAPVEFERRYA"
/note="IS3_IS3_ORF1      e-value= 1e-93 complete sequence
hit

coverage= 100%, length is 281aa with 9 gaps, 0 stops,
frame= Minus1"
CDS      complement(2442905..2442064)
/colour="255 0 0"
/evidence=predicted
/translation="AFMREHLGEFRLTAMCRVLGVNRSGYAWAGN--SGRPRRREDD
RLRGLIKHAWLASGTVYGYRKITREL R-EAGERCSRHRVRRMLKAEGIRAEIGYG---
-TKPRHRGgPpgMVENVVNRDFSPAAPNKVWVTDITYIRTYEGWTF LAVIVDLYSRQV
VGWAMQSQMTTDLVLQALVSAVWKRKPAAGLI IHSDQGSQFTSSDWLSLLKQNGMVPS
MSRRGNCHDNAVAESFFSALK--KERIKRRIYPTRDEARSDVFNYYIEMFYNPIRRHGS
AGNLAPVEFERRYA"
/note="IS3_IS3_ORF1      e-value= 2.7e-94 complete sequence
hit coverage= 100%, length is 281aa with 9 gaps, 0 stops,
frame= Minus1"
CDS      complement(2442893..2442052)
/colour="255 0 0"
/evidence=predicted
/translation="EHLGEFRLTAMCRVLGVNRSGYAWAGNSGRPRRREDDRLRGLI

```

KHAWLASGTVYGYRKITRELREAGERCSRHRVRRMLKAEIGIRAEIgyGTKPRHRGG--  
PPGMVENVVNRDFSPAA--PNKVWVTDITYIRTYEGWTFLLAVIVDLYSRQVVGWAMQS  
QMTTDLVLQALVSAVWK----RKPAAGLIHSDQGSQFTSSDWLSLLKQNGMVPSMSR  
RGNCHDNAVAESFFSALKKERIKRRIYPTRDEARSDVFNYIEMFYNPIRRHGSAGNLA  
PVEFERRYAQGS"

/note="IS3\_IS3\_ORF2 e-value= 2.8e-107 complete

sequence

hit coverage= 100%, length is 281aa with 8 gaps, 0 stops,  
frame= Minus1"

CDS

complement(2442893..2442052)

/colour="255 0 0"

/evidence=predicted

/translation="EHLGEFRLTAMCRVLGVNRSGYYAWAGNSGRPRRREDDRLRGLI  
KHAWLASGTVYGYRKITRELREAGERCSRHRVRRMLKAEIGIRAEIgyGTKPRHRGG--  
PPGMVENVVNRDFSPAA--PNKVWVTDITYIRTYEGWTFLLAVIVDLYSRQVVGWAMQS  
QMTTDLVLQALVSAVWK----RKPAAGLIHSDQGSQFTSSDWLSLLKQNGMVPSMSR  
RGNCHDNAVAESFFSALKKERIKRRIYPTRDEARSDVFNYIEMFYNPIRRHGSAGNLA  
PVEFERRYAQGS"

/note="IS3\_IS3\_ORF2 e-value= 7.8e-108 complete

sequence

hit coverage= 100%, length is 281aa with 8 gaps, 0 stops,  
frame= Minus1"

CDS

complement(2442884..2442061)

/colour="255 0 0"

/evidence=predicted

/translation="GEFRLTAMCRVLGVNRSGYYAWAGNS--GRPRRREddrLRGLIK  
HAWLASGTVYGYRKITREL---EAGERCSRHRVRRMLKAEIGIRAEIgyGTKPRHRGG  
PPGMV-ENVVNRDFSPAAPNKVWVTDITYIRTY-EGWTFLLAVIVDLYSRQVVGWAMQS  
QMTTDLVLQALVSAVWKRKPAAGLIHSDQGSQFTSSDWLSLLKQNGMVPSMSR  
RRGNCHDNAVAESFFSALKKERIK--RRIYPTRDEARSDVFNYIEMFYNPIRRHGSAG  
NLAPVEF-ERRYAQ"

/note="IS3\_IS150\_ORF2 e-value= 3.9e-68 fragment hit  
coverage= 73.78%, length is 275aa with 15 gaps, 0 stops,  
frame= Minus1"

CDS

complement(2442866..2442052)

/colour="255 0 0"

/evidence=predicted

/translation="AMCRVLGVN---RSGYYAWAGNSGRPRRREDDRLRGLIKHAWLA  
SGT-----VYGYRKITRELREAGERCSRHRVRRMLKAEIGIRAEIgyGTKPRHRGGPPG  
MV-ENVVNRDFSPAAPNKVWVTDITYIRTYEGWTFLLAVIVDLYSRQVVGWAMQSQMTT  
DLVLQALVSAVWKRKPA-----AGLIHSDQGSQFTSSDWLSLLKQNGMVPSMSRRGN  
CHDNAVAESFFSALKKERIKRRIYPTRDEARSDVFNYIEMFYNPIRRHGSAGNLAPVE  
FERRYAQGS"

/note="IS3\_IS51\_ORF2 e-value= 7.1e-151 fragment hit  
coverage= 90.22%, length is 272aa with 14 gaps, 0 stops,  
frame= Minus1"

CDS

complement(2442734..2442064)

/colour="255 0 0"

/evidence=predicted

/translation="VYGYRKITRELREAGERCSRHRVRRMLKAEIGIRAEIgyGT---K  
PRHRGGPPGMVENVVNRDFSPAAPNKVWVTDITYIRT--YEGWTFLLAVIVDLYSRQVV  
GWAMQSQMTTDLVLQALVSAVWK-RKPAAGLIHSDQGSQFTSSDWLSLLKQNGMVPS  
MSRRGNCHDNAVAESFFSALKKERIKRRIYPTRD--EARSDVFNYIEMFYNPIRRHGS  
AGNLAPVEF-ERRYA"

/note="IS3\_IS150\_ORF1 e-value= 2.3e-51 fragment hit  
coverage= 76.14%, length is 224aa with 9 gaps, 0 stops,  
frame= Minus1"

CDS

complement(2395079..2394205)

/colour="255 0 0"

/evidence=predicted

```

/translation="FGIGIDVSKATLDVAVHGEQ-----FRQFSNDKRGFVRLIRWL
KTWP-----IKQVVLEASGGYERAALDVLHAA---GLPMVRINPARARRFAOQT-GRA
AKTDRLDATVLAQMAHLLPLTRYVP--PAPW---QORLAEFAQCRRQLVQMRVSEMQR
LRRLVDPDLIA-----
-----MKQRHIAQLSDDLKQLDKAIAEQLEGQPGW
KNIGA-----LKGVGPILISTLACELP-ELGSLGSK-AIASLVGLAPMNRESG-TWQ
GQRRISG-GRAVVREALYMAALTAIRYEPRLRAFYAGLKAKGK---ASKVALVAVMRK
MLVILNAR"
/note="IS110 e-value= 1.4e-51 fragment hit coverage=
96.15%, length is 292aa with 108 gaps, 0 stops, frame=
Minus1"
CDS complement(2395079..2394142)
/colour="255 0 0"
/evidence=predicted
/translation="FGIGIDVSKATLDVAVHGEQ-----FRQFSNDKRGFVRLIRWL
KTWP-----IKQVVLEASGGYERAALDVLHAA---GLPMVRINPARARRFAOQT-GRA
AKTDRLDATVLAQMAHLLPLTRYVP--PAPW---QORLAEFAQCRRQLVQMRVSEMQR
LRRLVDPDLIA-----
-----MKQRHIAQLSDDLKQLDKAIAEQLEGQPGW
KNIGA-----LKGVGPILISTLACELP-ELGSLGSK-AIASLVGLAPMNRESG-TWQ
GQRRISG-GRAVVREALYMAALTAIRYEPRLRAFYAGLKAKGK---ASKVALVAVMRK
MLVILNARKrdaeVALGCPXQDSCYXPPP"
/note="IS110 e-value= 6.5e-50 complete sequence hit
coverage= 100%, length is 313aa with 108 gaps, 2 stops,
frame= Minus1"
CDS complement(1723697..1723555)
/colour="255 0 0"
/evidence=predicted
/translation="KRYTDEFKIEAVRQIVEYGRPVAEVAERLGVSIHSLYGWKROQG
KGDV"
/note="IS3_IS407_ORF1 e-value= 7.7e-06 fragment hit
coverage= 55.81%, length is 48aa with 0 gaps, 0 stops,
frame= Minus1"
CDS complement(1723544..1723417)
/colour="255 0 0"
/evidence=predicted
/translation="VEQDQNAEVRRLKAELRRVTEERDILK--KAAAYFAKXEQSTP
S"
/note="IS3_IS51_ORF1 e-value= 3.2e-08 fragment hit
coverage= 14.66%, length is 43aa with 2 gaps, 1 stops,
frame= Minus1"
CDS complement(877250..876166)
/colour="255 0 0"
/evidence=predicted
/translation="MAAAVCSRrcpSVGTASAAAPKADEKdpFVQAA--XGNEPRXAA
QGSRLSACGDRlPKKtRCLDPGRAGGARRkaqAIQGLRQVHTLSLL--LEAAELSRST
FYyQnhvLAHPDQDEAALCERIRAIYdQSKGRYGYRTVTLELANQGHRTNHKRVQRLM
GEMGLKSRVRV-KYRSFKGAANVVVgndlnrqfhaERPnQKW----VTDVTEfKvQg
MKLYLSPIMDLYNgeIVAYQIKRQPVFDLVGQMLEEAIKK-LSPDerpMIHSDQGWQY
QHENYRHMLEKHSLKQMSRRGNCLDNAAMESFFGTLKSEF--FYLnsFDNIESLEAG
LVEYIQYYNQERIKLKLKGLSPVEYRERARQSAAXPRPSLG"
/note="IS3_IS407_ORF2 e-value= 1.2e-08 complete sequence
hit coverage= 100%, length is 362aa with 12 gaps, 3
stops, frame= Minus1"
CDS complement(877244..876184)
/colour="255 0 0"
/evidence=predicted
/translation="AAVCSRRCPS-----VGTASAAAPKAD---EKDPFVQAAXGN
EPRXAAQGS-----RLSACGD---RLPKKTRCLDPG-----RAGGARRKAQAIQGLR
QVHTLSLLEAAELSRSTFYyQNHVL--AHPDqDEAALCERIRAIYDQSKGRYGYRTV

```

TLELA---NQGHRTNHKRVQRLMGEMGLKSRVRVK-RYRSFKGAANVVVGNDLNRQFH  
AERPNOQKWVTDVTEFKVQ-GMKLYLSPIMDLNGEIVAYQIKRQPVFDLVGQMLEEAI  
KKLSPDERPMIHS-----DQGWQYQHENYRHMLEKHSLKQSMSRRGNCLDNAAMESFF  
GTLKSEFFY--LNSFDNIESLEAGLVEYIQYYNQERIKLKLKGLSPVEYreRAQSAAX  
"

/note="IS3\_IS150\_ORF2 e-value= 1.4e-122 complete

sequence

hit coverage= 100%, length is 354aa with 38 gaps, 3  
stops, frame= Minus1"

CDS complement(877091..876193)

/colour="255 0 0"

/evidence=predicted

/translation="LPKKTRCLDPGRAGgARRKAQAIQGLRQVHTLSLLLEAAELSR  
TFYYQNHVLAHPDqDEAALCERIRAIYDQSKGRYGYRTVTLELANQGHRTNHKRVQRL  
MGEMGLKSRVRVK---RYRSFKGAANVVVGNDLNRQFHAERPNOQKWVTDVTEFKV--Q  
GMKLYLSPIMDLNGEIVAYQIKRQPVFDLVGQMLEEAIKK-LSPDERPMIHSQGWQ  
YQHENYRHMLEKHSLKQSMSRRGNCLDNAAMESFFGTLKSEFFYLNSFDNIE--SLEA  
GLVEYIQYYNQE-RIKLLKGLSPVEYRERAQS"

/note="IS3\_IS150\_ORF1 e-value= 3.1e-88 complete sequence  
hit coverage= 100%, length is 300aa with 9 gaps, 0 stops,  
frame= Minus1"

CDS complement(877091..876193)

/colour="255 0 0"

/evidence=predicted

/translation="LPKKTRCLDPGRAGgARRKAQAIQGLRQVHTLSLLLEAAELSR  
TFYYQNHVLAHPDqDEAALCERIRAIYDQSKGRYGYRTVTLELANQGHRTNHKRVQRL  
MGEMGLKSRVRVK---RYRSFKGAANVVVGNDLNRQFHAERPNOQKWVTDVTEFKV--Q  
GMKLYLSPIMDLNGEIVAYQIKRQPVFDLVGQMLEEAIKK-LSPDERPMIHSQGWQ  
YQHENYRHMLEKHSLKQSMSRRGNCLDNAAMESFFGTLKSEFFYLNSFDNIE--SLEA  
GLVEYIQYYNQE-RIKLLKGLSPVEYRERAQS"

/note="IS3\_IS150\_ORF1 e-value= 8e-89 complete sequence  
hit coverage= 100%, length is 300aa with 9 gaps, 0 stops,  
frame= Minus1"

CDS complement(877043..876184)

/colour="255 0 0"

/evidence=predicted

/translation="RRKAQAIQGLRQVHTLSLLLEAAELSRSTFYQNHVL--AHPDq  
DEAALCERIRAIYDQSKGRYGYRTVTLELA---NQGHRTNHKRVQRLMGEMGLKSRVR  
VK-RYRSFKGAANVVVGNDLNRQFHAERPNOQKWVTDVTEFKVQ-GMKLYLSPIMDLN  
GEIVAYQIKRQPVFDLVGQMLEEAIKKLSPDERPMIHS-----DQGWQYQHENYRHM  
LEKHSLKQSMSRRGNCLDNAAMESFFGTLKSEFFY--LNSFDNIESLEAGLVEYIQYYN  
QERIKLKLKGLSPVEYreRAQSAAX"

/note="IS3\_IS150\_ORF2 e-value= 1.9e-152 fragment hit  
coverage= 76.61%, length is 287aa with 14 gaps, 1 stops,  
frame= Minus1"

CDS complement(877034..876163)

/colour="255 0 0"

/evidence=predicted

/translation="AQAIQGLRQVHTLSLLLEAAELSRSTFYQNHVLAHPD-----  
QDEAALCERIRAIYDQSKGRYGYRTVTLELANQGHRTNHKRVQRLMGEMGLKSRVRVK  
RYRSFKGAANVVVG-NDLNRQFHAERPNOQKWVTDVTEFKV-QGmKLYLSPIMDLNGE  
IVAYQIKRQPVFDLV-GQMLEEAIKKLSPDE----RPMIHSQGWQYQHENYRHMLEK  
HSLKQSMSRRGNCLDNAAMESFFGTLKSEFFYL----NSFDNIESLEAGLVEYIQYYN  
Q-ERIKLKLKGLSPVEYreRAQSAAXPRPSLGG"

/note="IS3\_IS51\_ORF1 e-value= 3.8e-39 complete sequence  
hit coverage= 100%, length is 291aa with 18 gaps, 1  
stops, frame= Minus1"

CDS complement(877034..876160)

/colour="255 0 0"

/evidence=predicted

```

/translation="---AQAIQGLR-QVHTLSLLEA--AELSRS-----TFYYQNH
VLAHPDQDEAALCERIRAIYDQSKG-----RYGYRTVTLELANQGHRTNHKRVQRLMG
EMGLKSRVRVKRYRSFKG--AANVVVGNDLNRQFHAERPNOQKWVTDVTEFKVQGMKLYL
SPIMDLYNGEIVAYQIKRQPVFDLVGQMLEEAIKKLSPD-----ERPMIHSQGWQYQ
HENYRHMLEKHSKQSMSRRGNCLDNAAMESFFGTLKSEFFYLNSFDNIESLEAGLVE
YIQ-YYNQERIKLKLKGLSPVEYRER-AQSAAXPRPSLGGH"
/note="IS3_IS51_ORF2      e-value= 1.1e-16 complete sequence
hit coverage= 100%, length is 292aa with 25 gaps, 1
stops, frame= Minus1"
CDS      complement(877031..876196)
/colour="255 0 0"
/evidence=predicted
/translation="QAIQGLRQVHTLSLLEAAELSRSTFYQNHVLAHPD---QDEA
ALCERIRAIYDQSKGRYGYRTVTLELA-NQGHRTNHKRVQRLMGEMGLKSRVRV-KRY
RSFKgAANVVVGNDLNRQFHAERPNOQKWVTDVTEFKVQGMKLYLSPIMDLYNGEIVAY
QIKRQPVFDLVGQMLEEAIKKLSPDERPMIHSQGWQYQHENYRHMLEKHSKQSMSR
RGNCLDNAAMESFFGTLK--SEFFYLNSFDNIESLEAGLVEYIQ-YYNQERIKLKLKGL
LSPVEYRERAQ"
/note="IS3_IS3_ORF1      e-value= 9.5e-76 complete sequence
hit coverage= 100%, length is 279aa with 8 gaps, 0 stops,
frame= Minus1"
CDS      complement(877031..876196)
/colour="255 0 0"
/evidence=predicted
/translation="QAIQGLRQVHTLSLLEAAELSRSTFYQNHVLAHPD---QDEA
ALCERIRAIYDQSKGRYGYRTVTLELA-NQGHRTNHKRVQRLMGEMGLKSRVRV-KRY
RSFKgAANVVVGNDLNRQFHAERPNOQKWVTDVTEFKVQGMKLYLSPIMDLYNGEIVAY
QIKRQPVFDLVGQMLEEAIKKLSPDERPMIHSQGWQYQHENYRHMLEKHSKQSMSR
RGNCLDNAAMESFFGTLK--SEFFYLNSFDNIESLEAGLVEYIQ-YYNQERIKLKLKGL
LSPVEYRERAQ"
/note="IS3_IS3_ORF1      e-value= 2.5e-76 complete sequence
hit coverage= 100%, length is 279aa with 8 gaps, 0 stops,
frame= Minus1"
CDS      complement(877019..876184)
/colour="255 0 0"
/evidence=predicted
/translation="GLRQVHTLSLLEAAELSRSTFYQNHV-LAHPDQDEAALCERI
RAIYDQSKGRYGYRTVTLELANQGHRTNHKRVQRLMGEMGLKSRVRVKRYRSFKGAAN
VVVG-NDLNRQFHAER--PNQKWVTDVTEFKVQGMKLYLSPIMDLYNGEIVAYQIKRQ
PVFDLVGQMLEEAIKK----LSPDERPMIHSQGWQYQHENYRHMLEKHSKQSMSRR
GNCLDNAAMESFFGTLKSEFFYLNSFDNIESLEAGLVEYIQYY-NQERIKLKLKGLSP
VEYRERAQSAAX"
/note="IS3_IS3_ORF2      e-value= 5.3e-64 complete sequence
hit coverage= 100%, length is 279aa with 9 gaps, 1 stops,
frame= Minus1"
CDS      complement(877019..876184)
/colour="255 0 0"
/evidence=predicted
/translation="GLRQVHTLSLLEAAELSRSTFYQNHV-LAHPDQDEAALCERI
RAIYDQSKGRYGYRTVTLELANQGHRTNHKRVQRLMGEMGLKSRVRVKRYRSFKGAAN
VVVG-NDLNRQFHAER--PNQKWVTDVTEFKVQGMKLYLSPIMDLYNGEIVAYQIKRQ
PVFDLVGQMLEEAIKK----LSPDERPMIHSQGWQYQHENYRHMLEKHSKQSMSRR
GNCLDNAAMESFFGTLKSEFFYLNSFDNIESLEAGLVEYIQYY-NQERIKLKLKGLSP
VEYRERAQSAAX"
/note="IS3_IS3_ORF2      e-value= 1.5e-64 complete sequence
hit coverage= 100%, length is 279aa with 9 gaps, 1 stops,
frame= Minus1"
CDS      complement(876911..876211)
/colour="255 0 0"
/evidence=predicted

```

```

/translation="AALCERIRAIYDQSKGRYGYRTVTLELANQGHRTNHKRVQRLMG
EMGLKSRVRVKRYRSFKGAANVVVG-NDLNRQFHAERPNOQKWVTDVTEFKV-QGmKLY
LSPIMDLNGEIVAYQIKRQPVFDLV-GOMLEEAIKKLSPDE----RPMIHSDOGWQY
QHENYRHMLEKHSKQSMSRRGNCLDNAAMESFFGTLKSEFFYL----NSFDNIESLE
AGLVEYIQYYNQ-ERIKLKLKGLSPVEY"
/note="IS3_IS51_ORF1 e-value= 2.3e-45 fragment hit
coverage= 79.80%, length is 234aa with 12 gaps, 0 stops,
frame= Minus1"
CDS complement(876860..876334)
/colour="255 0 0"
/evidence=predicted
/translation="YGYRTVTLELANQGHRTNHKRVQRLMGEMGLKSRVRVKRYRSFK
G-AANVVVGNLNRQFHAERPNOQKWVTDVTEFKVQGMKLYLSPIMDLNGEIVAYQIK
RQPVFDLVGOMLEEAIKKLSPD-----ERPMSIHSDOGWQYQHENYRHMLEKHSKQSM
SRRGNCLDNAAMESFFGTLKSE"
/note="IS3_IS51_ORF2 e-value= 5.2e-32 fragment hit
coverage= 57.41%, length is 176aa with 6 gaps, 0 stops,
frame= Minus1"
CDS complement(876356..876250)
/colour="255 0 0"
/evidence=predicted
/translation="FFGTLKSEFFYLNS---FDNIESLEAGLVEYIQYYNQER"
/note="IS481 e-value= 1.2e-06 fragment hit coverage=
11.11%, length is 36aa with 3 gaps, 0 stops, frame=
Minus1"
CDS complement(504125..503017)
/colour="255 0 0"
/evidence=predicted
/translation="VQDRGGPT-----DRXVRPSGSGGCRAgRVDPXSLRLEAATR
QRRCPACRAGPERGS-APPQGXATQGHXRARHPKKSRRVL---CKGVRAKYAFMKQH
ADEFGLAAMCRMLGVHRSGYYAWLKEPASARDKDDQRLGLIKHSWLESGSVYGHRKV
TTDLR---ELGETCSRHRVARLMKSEGLRAMVGYGRRRPRPLSGPVGSVAKNVLARGFK
VSEPNRAWVTDITYIRTY-DGFLYLAVVLDLFSRQVVGWATRPTQHTDLVLQALLAAV
WRRKPSPLLLHS-----DQGTQFTSEDWQSFLREHDIVCSMSRRGNCHDNAAMESFF
QLLKRRERIK--RRIYSNHDEARADVFOYIEMFYNPKRRHSSNDGLSPVEFEKQYALN"
/note="IS3_IS150_ORF2 e-value= 1.2e-45 complete sequence
hit coverage= 100%, length is 370aa with 21 gaps, 4
stops, frame= Minus1"
CDS complement(503924..503020)
/colour="255 0 0"
/evidence=predicted
/translation="ARHPKKSRRVLCKgVRAKYAFMKQHADEFGLAAMCRMLGVHRsg
YYAWLKePASARDKDDQRLGLIKHSWLESGSVYGHRKVTTDLRELGETCSRHRVARL
MKSEGLRAMVGYGR--RPRPLSGPVGSVAKNVLARGFKVSEPNRAWVTDITYIRT--Y
DGFLYLAVVLDLFSRQVVGWATRPTQHTDLVLQALLAAVWR-RKPSPLLLHSDQGTQ
FTSEDWQSFLREHDIVCSMSRRGNCHDNAAMESFFQLLKRRERIKRRIYSNH--EARA
DVFOYIEMFYNPKRRHSSNDGLSPVEFEKQYAL"
/note="IS3_IS150_ORF1 e-value= 1.4e-57 complete sequence
hit coverage= 100%, length is 302aa with 7 gaps, 0 stops,
frame= Minus1"
CDS complement(503897..503020)
/colour="255 0 0"
/evidence=predicted
/translation="VLCKgVRAKYAFMKQHADEFGLAAMCRMLGVHRsgYYAWLKePA
SARDKDDQRLGLIKHSWLESGSVYGHRKVTTDLRELGETCSRHRVARLMKSEGLRAM
VGYGR--RPRPLSGPVGSVAKNVLARGFKVSEPNRAWVTDITYIRT--YDGFLYLAVV
LDLFSRQVVGWATRPTQHTDLVLQALLAAVWR-RKPSPLLLHSDQGTQFTSEDWQSF
LREHDIVCSMSRRGNCHDNAAMESFFQLLKRRERIKRRIYSNH--EARADVFOYIEMF
YNPKRRHSSNDGLSPVEFEKQYAL"
/note="IS3_IS150_ORF1 e-value= 5.1e-57 fragment hit

```

```

coverage= 97.06%, length is 293aa with 7 gaps, 0 stops,
frame= Minus1"
CDS complement(503888..502981)
/colour="255 0 0"
/evidence=predicted
/translation="KGVRAKYAFMKQHAD--EFGLAAMCRMLGVH---RSGYYAWLKE
PASARDKDDQRLGLIKHSWLESGS-----VYGHRKVTDLRELGETCSRHRVARLMK
SEGLRAMVGYGRRPRPLSGPVGSVAKNVLARGFKVSEPNRAWVTDITYIRTYDGFLYL
AVVLDLFSRQVVGWATRPTQHTDLVLQALLAAVWRRKPS-----PGLLLHSDQGTQFT
SEDWQSFLREHDIVCSMSRRGNCHDNAAMESFFQLLKRRIRRIYSNHDEARADVFO
YIEMFYNPKRRHSSNDGLSPVEFEKQYALNGxRLSRKPWAIQ"
/note="IS3_IS51_ORF2 e-value= 1.4e-134 complete
sequence
hit coverage= 100%, length is 303aa with 15 gaps, 0
stops, frame= Minus1"
CDS complement(503870..503026)
/colour="255 0 0"
/evidence=predicted
/translation="YAFMKQHADEFGLAAMCRMLGVHRSGYYAWL-----KEPASARD
KDDQRLGLIKHSWLESGSVYGHRKVTDLRELGETCSRHRVARLMKSEGLRAMVGYG
RRPRPLSGPVGSVAKNVLARGFKVSEPNRAWVTDITYIRTYDGFLYLAVVLDLFSRQV
VGWATRPTQHTDLV-LQALLAAVWRRKPS-----GLLLHSDQGTQFTSEDWQSFLREH
DIVCSMSRRGNCHDNAAMESFFQLLKRRIRKR----RIYSNHDEARADVFOYIEMFYN
PKRRHSSNDGLSPVEFEKQY"
/note="IS3_IS51_ORF1 e-value= 3.9e-110 fragment hit
coverage= 96.42%, length is 282aa with 14 gaps, 0 stops,
frame= Minus1"
CDS complement(503870..502993)
/colour="255 0 0"
/evidence=predicted
/translation="YAFMKQHADEFGLAAMCRMLGVHRSGYYAWL-----KEPASARD
KDDQRLGLIKHSWLESGSVYGHRKVTDLRELGETCSRHRVARLMKSEGLRAMVGYG
RRPRPLSGPVGSVAKNVLARGFKVSEPNRAWVTDITYIRTYDGFLYLAVVLDLFSRQV
VGWATRPTQHTDLV-LQALLAAVWRRKPS-----GLLLHSDQGTQFTSEDWQSFLREH
DIVCSMSRRGNCHDNAAMESFFQLLKRRIRKR----RIYSNHDEARADVFOYIEMFYN
PKRRHSSNDGLSPVEFEKQYALNGXRLSRKP"
/note="IS3_IS51_ORF1 e-value= 3.7e-108 complete
sequence
hit coverage= 100%, length is 293aa with 14 gaps, 1
stops, frame= Minus1"
CDS complement(503867..503023)
/colour="255 0 0"
/evidence=predicted
/translation="AFMKQHADEFGLAAMCRMLGVHRSGYYAWLKE--PASARDKDDQ
RLGLIKHSWLESGSVYGHRKVTDLR-ELGETCSRHRVARLMKSEGLRAMVGYG-RR
PRPLSgPVGSVAKNVLARGFKVSEPNRAWVTDITYIRTYDGFLYLAVVLDLFSRQVVG
WATRPTQHTDLVLQALLAAVWRRKPSGLLHSDQGTQFTSEDWQSFLREHDIVCSMS
RRGNCHDNAAMESFFQLLK--RERIKRRIYSNHDEARADVFOYIEMFYNPKRRHSSND
GLSPVEFEKQYA"
/note="IS3_IS3_ORF1 e-value= 1.9e-94 complete sequence
hit coverage= 100%, length is 282aa with 6 gaps, 0 stops,
frame= Minus1"
CDS complement(503867..503023)
/colour="255 0 0"
/evidence=predicted
/translation="AFMKQHADEFGLAAMCRMLGVHRSGYYAWLKE--PASARDKDDQ
RLGLIKHSWLESGSVYGHRKVTDLR-ELGETCSRHRVARLMKSEGLRAMVGYG-RR
PRPLSgPVGSVAKNVLARGFKVSEPNRAWVTDITYIRTYDGFLYLAVVLDLFSRQVVG
WATRPTQHTDLVLQALLAAVWRRKPSGLLHSDQGTQFTSEDWQSFLREHDIVCSMS
RRGNCHDNAAMESFFQLLK--RERIKRRIYSNHDEARADVFOYIEMFYNPKRRHSSND

```



GLSPVEFEKQYA"  
 /note="IS3\_IS3\_ORF1 e-value= 4.9e-95 complete sequence  
 hit coverage= 100%, length is 282aa with 6 gaps, 0 stops,  
 frame= Minus1"  
 CDS complement(503855..503011)  
 /colour="255 0 0"  
 /evidence=predicted  
 /translation="QHADEFGLAAMCRMLGVHRSGYYAWLKEPASARDKDDQRLGLI  
 KHSWLESGSVYGHRKVTDLRELGETCSRHRVARLMKSEGLRAMvGYRRRPRPLSGPV  
 GSVAK-NVLARGFKVSE--PNRAWVTDITYIRTYDGFLYLAVVLDLFSRQVVGWATRP  
 TQHTDLVLQALLAAVWR----RKPSPLLHSDQGTQFTSEDWQSFLEHDIVCMSMR  
 RGNCHDNAAMESFFQLLKREIRIKRIYSNHDEARADVFOYIEMFYNPKRHRSSNDGLS  
 PVEFEKQYALNGX"  
 sequence /note="IS3\_IS3\_ORF2 e-value= 7.1e-102 complete  
 hit coverage= 100%, length is 282aa with 7 gaps, 1 stops,  
 frame= Minus1"  
 CDS complement(503855..503011)  
 /colour="255 0 0"  
 /evidence=predicted  
 /translation="QHADEFGLAAMCRMLGVHRSGYYAWLKEPASARDKDDQRLGLI  
 KHSWLESGSVYGHRKVTDLRELGETCSRHRVARLMKSEGLRAMvGYRRRPRPLSGPV  
 GSVAK-NVLARGFKVSE--PNRAWVTDITYIRTYDGFLYLAVVLDLFSRQVVGWATRP  
 TQHTDLVLQALLAAVWR----RKPSPLLHSDQGTQFTSEDWQSFLEHDIVCMSMR  
 RGNCHDNAAMESFFQLLKREIRIKRIYSNHDEARADVFOYIEMFYNPKRHRSSNDGLS  
 PVEFEKQYALNGX"  
 hit /note="IS3\_IS3\_ORF2 e-value= 2e-102 complete sequence  
 coverage= 100%, length is 282aa with 7 gaps, 1 stops,  
 frame= Minus1"  
 CDS complement(503843..503017)  
 /colour="255 0 0"  
 /evidence=predicted  
 /translation="EFGLAAMCRMLGVHRSGYYAWLKEPASARDKDDQRLGLIKHSW  
 LESGSVYGHRKVTDLR---ELGETCSRHRVARLMKSEGLRAMvGYRRRPRPLSGPVG  
 SVAKNVLARGFKVSEPNRAWVTDITYIRTY-DGFLYLAVVLDLFSRQVVGWATRP  
 TDVLQALLAAVWRKPSPLHSDQGTQFTSEDWQSFLEHDIVCMSMR  
 RGNCHDNAAMESFFQLLKREIRIK--RIYSNHDEARADVFOYIEMFYNPKRHRSSNDGLS  
 PVEFEKQYALN"  
 /note="IS3\_IS150\_ORF2 e-value= 1.9e-74 fragment hit  
 coverage= 73.52%, length is 276aa with 11 gaps, 0 stops,  
 frame= Minus1"  
 CDS complement(503840..503023)  
 /colour="255 0 0"  
 /evidence=predicted  
 /translation="FGLAAMCRMLGVH---RSGYYAWLKEPASARDKDDQRLGLIKH  
 SWLESGS-----VYGHRKVTDLRELGETCSRHRVARLMKSEGLRAMvGYRRRPRPLS  
 GPVGSVAKNVLARGFKVSEPNRAWVTDITYIRTYDGFLYLAVVLDLFSRQVVGWATRP  
 TQHTDLVLQALLAAVWRKPS-----PGLLHSDQGTQFTSEDWQSFLEHDIVCMS  
 RRGNCHDNAAMESFFQLLKREIRIKRIYSNHDEARADVFOYIEMFYNPKRHRSSNDGL  
 SPVEFEKQYA"  
 /note="IS3\_IS51\_ORF2 e-value= 7.1e-152 fragment hit  
 coverage= 90.22%, length is 273aa with 13 gaps, 0 stops,  
 frame= Minus1"  
 CDS complement(4482787..4481874)  
 /colour="255 0 0"  
 /evidence=predicted  
 /translation="NARLTPFSRELLVRRITEQGLRPEEAAQACGVSVRTAYKWLARY  
 RAELIGLQNRSSRPSRSPHGTPEALVEQIVQRR-RQRQTYLTISKALG-----  
 VAHSTISRLMRRRGLNRLCLLDPPK-----KAVR-----YEYDSPGGLLHLDIKK

```

-----LGNFHRPGHRVDPnRRGNAGGGGWGYVHVAIDDHSRVAFSSVHTDEKGSTACQ
ALLAALAYYKTLGVT-FQRLVTDNGACYRSG----VFARLVASLGMKHYRTKPYTPRT
NGKAERFIQTSLEWAYACE---YASSEQRDAVLPEWLHYYNWHRPHM--GIGSQPPI
SRIPLNNVV"
/note="IS481 e-value= 5.6e-93 fragment hit coverage=
97.44%, length is 305aa with 38 gaps, 0 stops, frame=
Minus2"
CDS complement(4482787..4481847)
/colour="255 0 0"
/evidence=predicted
/translation="NARLTPFSRELLVRRITEQGLRPEEAAQACGVSVRTAYKWLARY
RAEGLIGLQNRSSRPSRSPHGTPEALVEQIVQRR-RQRQTYLTISKALG-----
VAHSTISRLMRRRGLNRLCLLDPPK-----KAVR-----YEYDSPGGLLHLDIKK
-----LGNFHRPGHRVDPnRRGNAGGGGWGYVHVAIDDHSRVAFSSVHTDEKGSTACQ
ALLAALAYYKTLGVT-FQRLVTDNGACYRSG----VFARLVASLGMKHYRTKPYTPRT
NGKAERFIQTSLEWAYACE---YASSEQRDAVLPEWLHYYNWHRPHM--GIGSQPPI
SRIPLNNVVGLHNXQSTL"
/note="IS481 e-value= 1.5e-93 complete sequence hit
coverage= 100%, length is 314aa with 38 gaps, 1 stops,
frame= Minus2"
CDS complement(4482733..4482465)
/colour="255 0 0"
/evidence=predicted
/translation="QGLRPEEAAQACGVSVRTAYKWLARYRAEG---LIGLQ--NRSS
RPSRSPHGTPEALVEQIVQRR-----RQRQTYLTISKALG-----VAHSTISRLM
RRRGLN"
/note="IS630 e-value= 8.1e-07 fragment hit coverage=
28.72%, length is 90aa with 18 gaps, 0 stops, frame=
Minus2"
CDS complement(4482166..4481934)
/colour="255 0 0"
/evidence=predicted
/translation="RVLTDNGACYRSGVFARLVASLGMKHYRTKPYTPRTNGKAERFI
QTSLEWAY--ACEYASSEQRDAVLPEWLHYYNWHR"
/note="IS3_IS150_ORF2 e-value= 2.5e-08 fragment hit
coverage= 20.57%, length is 78aa with 2 gaps, 0 stops,
frame= Minus2"
CDS complement(4037740..4036800)
/colour="255 0 0"
/evidence=predicted
/translation="NARLTVHSRALLIRRILHEGLRPEEAAQACGVSVRTAYKWLARF
RQFGAPGLENRSSRPHQTPHATPAPVIEQIKEHR-RKRQTYLTISKALG-----
VGHSTISRLMRAHGLNRLCRLEPPK-----EVIR-----YEYDQPGGLLHLDIKK
-----LGNFQRPGRHTDakRRGNAAAGGGWGYVHVAIDDHSRVAFSSVHPNEQAETACQ
ALLGALQYYASLGIT-FKRILTDNGACYRST----AFAKLLKSLGIKHIRTTPYTPRT
NGKAERFIQTSLEWAYARE---YASSDQRNSVLTQWLHYYNWHRPHM--GIGSQPPI
SRVLLNNVVGLHSXSTAF"
/note="IS481 e-value= 2.4e-94 complete sequence hit
coverage= 100%, length is 314aa with 38 gaps, 1 stops,
frame= Minus2"
CDS complement(4037740..4036800)
/colour="255 0 0"
/evidence=predicted
/translation="NARLTVHSRALLIRRILHEGLRPEEAAQACGVSVRTAYKWLARF
RQFGAPGLENRSSRPHQTPHATPAPVIEQIKEHR-RKRQTYLTISKALG-----
VGHSTISRLMRAHGLNRLCRLEPPK-----EVIR-----YEYDQPGGLLHLDIKK
-----LGNFQRPGRHTDakRRGNAAAGGGWGYVHVAIDDHSRVAFSSVHPNEQAETACQ
ALLGALQYYASLGIT-FKRILTDNGACYRST----AFAKLLKSLGIKHIRTTPYTPRT
NGKAERFIQTSLEWAYARE---YASSDQRNSVLTQWLHYYNWHRPHM--GIGSQPPI
SRVLLNNVVGLHSXSTAF"

```

```

/note="IS481 e-value= 6.4e-95 complete sequence hit
coverage= 100%, length is 314aa with 38 gaps, 1 stops,
frame= Minus2"
CDS complement(4037119..4036854)
/colour="255 0 0"
/evidence=predicted
/translation="RILTDNGACYRSTAFAKLLKSLGIKHIRTkPYTPRTNGKAERFI
QTSLREWAY--AREYASSDQRNSVLTQWLHHYNWHRPHMGIGGQPPI"
/note="IS3_IS150_ORF2 e-value= 1.8e-10 fragment hit
coverage= 23.39%, length is 89aa with 2 gaps, 0 stops,
frame= Minus2"
CDS complement(4036924..4036857)
/colour="255 0 0"
/evidence=predicted
/translation="VLTQWLHHYNWHRPHMGIGGQPP"
/note="IS3_IS407_ORF2 e-value= 4.1e-07 fragment hit
coverage= 6.69%, length is 23aa with 0 gaps, 0 stops,
frame= Minus2"
CDS complement(2521012..2520870)
/colour="255 0 0"
/evidence=predicted
/translation="KRYTDEFKIEAVRQIVEYGRPVAEVAERLGVSIHSLYGWKRQOG
KGDV"
/note="IS3_IS407_ORF1 e-value= 7.7e-06 fragment hit
coverage= 55.81%, length is 48aa with 0 gaps, 0 stops,
frame= Minus2"
CDS complement(2520859..2520732)
/colour="255 0 0"
/evidence=predicted
/translation="VEQDQNAEVRRLKAELRRVTEERDILK--KAAAYFAKGXEQSTP
S"
/note="IS3_IS51_ORF1 e-value= 3.2e-08 fragment hit
coverage= 14.66%, length is 43aa with 2 gaps, 1 stops,
frame= Minus2"
CDS complement(2508721..2507643)
/colour="255 0 0"
/evidence=predicted
/translation="VQARCGXAGQPAGRQLCPGGPGAGDPGC-IADPLEAGGPEPGp
gLRWHRDAPGRGTGAAQARAGPGE-EGAGFFARSGDVLCOGIILR-----YQVI
ERCRDEFPVRLMCRCLRVASAGYYDWSKRLPSARERDNQRLLGRIELHEDSRGTLGA
GRMHEDLA---EEGETASLNRVARLMATDGLQGWRPK-----RRGQRGKPaltp
pgvRNLLEDFTALEPETRWVTDITELKTR-QGKLYLCIVLDFDQRVVGVSMHHRQDRQ
MVIKAVQMAVWQROGSHPLILHS-----DRGSQFRSGDYQRYLAANGLVCSMSAV
GHCGDNAACEGFFGLLKREVRVY--RMTYPTLDAARADVFEYIERFHNP-----
RRRVARQ"
/note="IS3_IS150_ORF2 e-value= 1.6e-25 complete sequence
hit coverage= 100%, length is 360aa with 39 gaps, 1
stops, frame= Minus2"
CDS complement(2508514..2507616)
/colour="255 0 0"
/evidence=predicted
/translation="AGFFARSGDVLCOgIILRYQVIERCRCRDEFPVRLMCRCLRV
SASGYDWSKRLPSARERDNQRLLGRIELHEDSRGTLGAGRMHEDLAEGETASLNR
VARLMATDGLQGWRPKR--RGQRGKPalTPPGVrNLLERDFTALEPETRWVTDIT
ELKT--RQKLYLCIVLDFDQRVVGVSMHHRQDRQMVIRAVQMAVWQ-RQGSHP
LILHSDRGSQFRSGDYQRYLAANGLVCSMSAVGHCGDNAACEGFFGLLKREVRV
YRMTYPTLD--AARADVFEYIERFHNP---RMRRRVARQDQKFSALLQ"
/note="IS3_IS150_ORF1 e-value= 1.5e-33 complete sequence
hit coverage= 100%, length is 300aa with 10 gaps, 0
stops, frame= Minus2"

```

CDS complement(2508478..2507577)  
/colour="255 0 0"  
/evidence=predicted  
/translation="QGIILRYQVIERCRD--EFPVRLMCRCLRVS---ASGYDWSKR  
LPSARERDNQRLLGRIRELHEDSRG-----TLGAGRMHEDLAEGETASLNRRVARLMA  
TDGLQGW--PRPKRRGQRGKPALTPPgvrNLLERDFTALEPETRWVTDITELKTRQGK  
LYLCIVLDLDFDQRVVVGWSMHRQDRQMVIRAVQMAVWQROGS-----HPLILHSDRGS  
QFRSGDYQRYLAANGLVCSMSAVGHCGDNAACEGFFGLLKREVRMYPTLDAARAD  
VFEYIERFHNPRmRRRVARQD---QKFSALLQPSVISGXNPCNLR"  
/note="IS3\_IS51\_ORF2 e-value= 7.4e-58 complete sequence  
hit coverage= 100%, length is 301aa with 20 gaps, 1  
stops, frame= Minus2"

CDS complement(2508460..2507667)  
/colour="255 0 0"  
/evidence=predicted  
/translation="YQVIERCRDEFPVRLMCRCLRVVSASGYDWS-----KRLPSARE  
RDNQRLLGRIRELHEDSRGTLGAGRMHEDLAEGETASLNRRVARLMAATDGLQGWPRPK  
RRGQRgKPALTPPGVRNLLERDFTALEPETRWVTDITELKTRQGKLYLCIVLDLDFDQ  
RVVVGWSMHRQDRQMV-IRAVQMAVWQROGSH----PLILHSDRGSQFRSGDYQRYLAA  
NGLVCSMSAVGHCGDNAACEGFFGLLKREVRMYPTLDAARADVFEYIERFH  
N-PR"  
/note="IS3\_IS51\_ORF1 e-value= 1.7e-73 fragment hit  
coverage= 90.88%, length is 265aa with 15 gaps, 0 stops,  
frame= Minus2"

CDS complement(2508460..2507601)  
/colour="255 0 0"  
/evidence=predicted  
/translation="YQVIERCRDEFPVRLMCRCLRVVSASGYDWS-----KRLPSARE  
RDNQRLLGRIRELHEDSRGTLGAGRMHEDLAEGETASLNRRVARLMAATDGLQGWPRPK  
RRGQRgKPALTPPGVRNLLERDFTALEPETRWVTDITELKTRQGKLYLCIVLDLDFDQ  
RVVVGWSMHRQDRQMV-IRAVQMAVWQROGSH----PLILHSDRGSQFRSGDYQRYLAA  
NGLVCSMSAVGHCGDNAACEGFFGLLKREVRMYPTLDAARADVFEYIERFH  
NPRMRRRVARQDQK-----FSALLQPSVIS"  
/note="IS3\_IS51\_ORF1 e-value= 7.6e-67 complete sequence  
hit coverage= 100%, length is 287aa with 21 gaps, 0  
stops, frame= Minus2"

CDS complement(2508457..2507685)  
/colour="255 0 0"  
/evidence=predicted  
/translation="QVIERCRDEFPVRLMCRCLRVVSASGYDWSKRLPSARERDNQRL  
LGRIRELHEDSRGTLGAGRMHEDLA---EEGETASLNRRVARLMAATDGLQGWPRPK---  
--RRGQRGKPaltppgvrNLLERDFTALEPETRWVTDITELKTR-QGKLYLCIVLDLDF  
DQRVVVGWSMHRQDRQMVIRAVQMAVWQROGSHPLILHS-----DRGSQFRSGDYQRY  
LAANGLVCSMSAVGHCGDNAACEGFFGLLKREVRMYPTLDAARADVFEYIE"  
/note="IS3\_IS150\_ORF2 e-value= 1.7e-58 fragment hit  
coverage= 68.89%, length is 258aa with 16 gaps, 0 stops,  
frame= Minus2"

CDS complement(2508457..2507664)  
/colour="255 0 0"  
/evidence=predicted  
/translation="QVIERCRDEFPVRLMCRCLRVVSASGYDWSKR--LPSARERDNQ  
RLLGRIRELHEDSRGTLGAGRMHEDLA-EEGETASLNRRVARLMAATDGLQGWPRPKRRG  
QRGKpALTpPGVRNLLERDFTALEPETRWVTDITELKTRQGKLYLCIVLDLDFDQRVV  
WSMHRQDRQMVIRAVQMAVWQROGSHPLILHSDRGSQFRSGDYQRYLAANGLVCSMS  
AVGHCGDNAACEGFFGLLK--RERVYRMYPTLDAARADVFEYIERFHNp-RM"  
/note="IS3\_IS3\_ORF1 e-value= 4e-75 fragment hit  
coverage=  
94.06%, length is 265aa with 6 gaps, 0 stops, frame=  
Minus2"

CDS complement(2508457..2507625)

```

/colour="255 0 0"
/evidence=predicted
/translation="QVIERCRDEFFVRLMCRCLRVASAGYYDWSKR--LPSARERDNQ
RLLGRIRELHEDSRGTLGAGRMHEDLA-EEGETASLNRVARLMATDGLQGWPRPKRRG
QRGKpALTpPGVRNLLERDFTALEPETRWVTDITELKTRQGKLYLCIVLDFDQRVVG
WSMHRQDRQMVIRAVQMAVWQROGSHPLILHSDRGSQFRSGDYQRYLAANGLVCSMS
AVGHCGDNAACEGFFGLLK--RERVYRMTYPTLDAARADVFEYIERFHNP-RMRRRVA
----RQDQKFS"
/note="IS3_IS3_ORF1      e-value= 2.4e-72 complete sequence
hit coverage= 100%, length is 278aa with 10 gaps, 0
stops, frame= Minus2"
CDS      complement(2508445..2507649)
/colour="255 0 0"
/evidence=predicted
/translation="RCRDEFFVRLMCRCLRVASAGYYDWSKRLPSARERDNQRLLGRI
RELHEDSRGTLGAGRMHEDLAEEGETASLNRVARLMATDGLQGWPRPKRRGQRGK--P
ALTPPgvrNLLERDFTALE--PETRWVTDITELKTRQGKLYLCIVLDFDQRVVGWSM
HHRQDRQMVIRAVQMAVWQ----RQGSHPILHSDRGSQFRSGDYQRYLAANGLVCSM
SAVGHC DNAACEGFFGLLKREERVYRMTYPTLDAARADVFEYIERFHNPpRMRRRVA"
/note="IS3_IS3_ORF2      e-value= 2.2e-69 fragment hit
coverage= 93.75%, length is 266aa with 8 gaps, 0 stops,
frame= Minus2"
CDS      complement(2508445..2507628)
/colour="255 0 0"
/evidence=predicted
/translation="RCRDEFFVRLMCRCLRVASAGYYDWSKRLPSARERDNQRLLGRI
RELHEDSRGTLGAGRMHEDLAEEGETASLNRVARLMATDGLQGWPRPKRRGQRGK--P
ALTPPgvrNLLERDFTALE--PETRWVTDITELKTRQGKLYLCIVLDFDQRVVGWSM
HHRQDRQMVIRAVQMAVWQ----RQGSHPILHSDRGSQFRSGDYQRYLAANGLVCSM
SAVGHC DNAACEGFFGLLKREERVYRMTYPTLDAARADVFEYIERFHNPpRMRRRVA--
-----RQDQKFS"
/note="IS3_IS3_ORF2      e-value= 2.6e-66 complete sequence
hit coverage= 100%, length is 273aa with 19 gaps, 0
stops, frame= Minus2"
CDS      complement(2508424..2507670)
/colour="255 0 0"
/evidence=predicted
/translation="VRLMCRCLRVASAGYYDWSKRLPSARERDNQRLLGRIRELH
EDSRG-----TLGAGRMHEDLAEEGETASLNRVARLMATDGLQGW--PRPKRRGQRGK
PALTPPgvrNLLERDFTALEPETRWVTDITELKTRQGKLYLCIVLDFDQRVVGWSMH
HRQDRQMVIRAVQMAVWQROGS-----HPLILHSDRGSQFRSGDYQRYLAANGLVCSM
SAVGHC DNAACEGFFGLLKREERVYRMTYPTLDAARADVFEYIERFHNP"
/note="IS3_IS51_ORF2     e-value= 1.5e-73 fragment hit
coverage= 83.28%, length is 252aa with 15 gaps, 0 stops,
frame= Minus2"
CDS      complement(2508394..2507673)
/colour="255 0 0"
/evidence=predicted
/translation="SAGYYDWSKRLPSARERDNQRLLGRIRELHEDSRGTLGAGRMH
EDLAEEGETASLNRVARLMATDGLQGWPRPKR--RGQRGKPALTPPgvrNLLERDFTA
LEPETRWVTDITELKT--RQKLYLCIVLDFDQRVVGWSMHRQDRQMVIRAVQMAV
WQ-RQGSHPILHSDRGSQFRSGDYQRYLAANGLVCSMSAVGHCGDNAACEGFFGLLK
REERVYRMTYPTLD--AARADVFEYIERFHNP"
/note="IS3_IS150_ORF1    e-value= 2.4e-37 fragment hit
coverage= 80.39%, length is 241aa with 7 gaps, 0 stops,
frame= Minus2"
CDS      complement(2447827..2447712)
/colour="255 0 0"
/evidence=predicted
/translation="KQYTDEFKAEAVKQVTERGFAVAEVAKRLGVSSHSPLYQW"

```

```

/note="IS3_IS407_ORF1 e-value= 7e-06 fragment hit
coverage= 45.35%, length is 39aa with 0 gaps, 0 stops,
frame= Minus2"
CDS complement(2447419..2446239)
/colour="255 0 0"
/evidence=predicted
/translation="FLQLRSLKLTLEILTSEDS-YVVKAEG-----VNQW
VTCPLCKTGCLHGHGSQEQSFQDTPTHGKPVVIFIQRRRYRCTSCTKTIFEPVADLDG
KRQATARLVRYIRDQSFSK--TFAALAREVAVEEKTVRHVFDFFIEEVEAKTQFRTPR
VLGIDELKIIIG----QYRAMITNVERK----TVFDIRPSRAKAELMPYFR---DLRDK
DSVEWVAMDMYHVYRQVVRATLPQARIVVDRFHIQRMANDALEKLR---KRIRK----
-----DLSTR-----QRLKLDKDERFLLLKRQHDLTGR-DMDRMREWFQ
--QFPLLSEAHALKEGFLSIWDQKTRPAAEAACAKWQANIPTELAATFKDLTTAVHNW
HDEIFA-YFEQPIITNAYTESVNRVAKDMNRMGRGYS-FEVLRARMLYdKKARKDGSVI
ETVL"
/note="ISL3 e-value= 1.1e-43 complete sequence hit
coverage= 100%, length is 394aa with 60 gaps, 0 stops,
frame= Minus2"
CDS complement(2447329..2446284)
/colour="255 0 0"
/evidence=predicted
/translation="TCPLCKTGCLHGHGSQEQSFQDTPTHGKPVVIFIQRRRYRCTSC
TKTIFEPVADLDGKRQATARLVRYIRDQSFSK--TFAALAREVAVEEKTVRHVFDFFI
EEVEAKTQFRTPRVLGIDELKIIIG----QYRAMITNVERK----TVFDIRPSRAKAEL
MPYFR---DLRDKDSVEWVAMDMYHVYRQVVRATLPQARIVVDRFHIQRMANDALEKL
RKRIKDLSTRQRLkLKDERFLLLKRQHDLTGRDMDRMREWFQFPLLSEAHALKEGF
LSI-WDQKTRPAAEAACAKWQANIPTELAATFKDLTTAVHNWHDEIFAYFEQPI--TN
AYTESVNRVAKDMNRMGRGYSFEVLRARMLY"
/note="ISL3 e-value= 5.3e-50 fragment hit coverage=
80.49%, length is 349aa with 16 gaps, 0 stops, frame=
Minus2"
CDS complement(2023897..2023779)
/colour="255 0 0"
/evidence=predicted
/translation="PPEQREVLQLRLDQELSLEEIGQITGVGRETVKSRLRYAM"
/note="IS21_ORF1 e-value= 2.4e-06 fragment hit coverage=
7.62%, length is 40aa with 0 gaps, 0 stops, frame=
Minus2"
CDS complement(1143877..1142961)
/colour="255 0 0"
/evidence=predicted
/translation="NGIGIDVSKRRLDIGTTDGQT-----LQVSNSPSGYAEI
STWLSTRP-----AIQIVLEATGGYEQTVLDFLHKA---GHPVIRANALRARRLA-QGLGKV
AKTDRLDALVLAQMA--ALVELPSYQPLEPW----QRKLREFVRRARQTMQALTVARQ
QQEMVTDRELRRQMQG-----
-----NIIRLQTLVERLGKQISEQVAQ-QPOLAVL
KS-----MKGVGPALQAVLASYP-ELGQISGK-AIASLVGVAPISHDSG-AMR
GRRSIHG-GRAEIRQVLYMAAMSAMRHEPRLRDFYRSLRARGK---EGKVAIVAVMRK
MLVILNARVRDAE--NGLVPAXGQ"
/note="IS110 e-value= 3.4e-46 complete sequence hit
coverage= 100%, length is 306aa with 110 gaps, 1 stops,
frame= Minus2"
CDS complement(1143877..1142994)
/colour="255 0 0"
/evidence=predicted
/translation="NGIGIDVSKRRLDIGTTDGQT-----LQVSNSPSGYAEI
STWLSTRP-----AIQIVLEATGGYEQTVLDFLHKA---GHPVIRANALRARRLA-QGLGKV
AKTDRLDALVLAQMA--ALVELPSYQPLEPW----QRKLREFVRRARQTMQALTVARQ
QQEMVTDRELRRQMQG-----
-----NIIRLQTLVERLGKQISEQVAQ-QPOLAVL

```

KS-----MKGVPALQAVLASYP-ELGQISGK-AIASLVGVAPISHDSG-AMR  
 GRSIHG-GRAEIRQVLYMAAMSAMRHEPRLRDFYRSLRARGK---EGKVAIVAVMRK  
 MLVILNARVRD"  
 /note="IS110 e-value= 1e-48 fragment hit coverage=  
 96.88%, length is 295aa with 108 gaps, 0 stops, frame=  
 Minus2"  
 CDS complement(730597..729681)  
 /colour="255 0 0"  
 /evidence=predicted  
 /translation="NGIGIDVSKRRLDIGTTDGQT-----LQVSNPSGYAELSTWL  
 STRP-----AIQIVLEATGGYEQTVLDFLHKA---GHPVIRANALRARRLA-QGLGKV  
 AKTDRLDALVLAQMA--ALVELPSYQPLEPW----QRKLREFVRRARRQTMQALTVARQ  
 QQEMVTDRELRRQMQG-----  
 -----NIIRLQTLVERLGKQISEQVAQ-QPQLAVL  
 KS-----MKGVPALQAVLASYP-ELGQISGK-AIASLVGVAPISHDSG-AMR  
 GRSIHG-GRAEIRQVLYMAAMSAMRHEPRLRDFYRSLRARGK---EGKVAIVAVMRK  
 MLVILNARVRDAE--NGLVPAXGQ"  
 /note="IS110 e-value= 2.5e-43 complete sequence hit  
 coverage= 100%, length is 306aa with 110 gaps, 1 stops,  
 frame= Minus2"  
 CDS complement(730597..729714)  
 /colour="255 0 0"  
 /evidence=predicted  
 /translation="NGIGIDVSKRRLDIGTTDGQT-----LQVSNPSGYAELSTWL  
 STRP-----AIQIVLEATGGYEQTVLDFLHKA---GHPVIRANALRARRLA-QGLGKV  
 AKTDRLDALVLAQMA--ALVELPSYQPLEPW----QRKLREFVRRARRQTMQALTVARQ  
 QQEMVTDRELRRQMQG-----  
 -----NIIRLQTLVERLGKQISEQVAQ-QPQLAVL  
 KS-----MKGVPALQAVLASYP-ELGQISGK-AIASLVGVAPISHDSG-AMR  
 GRSIHG-GRAEIRQVLYMAAMSAMRHEPRLRDFYRSLRARGK---EGKVAIVAVMRK  
 MLVILNARVRD"  
 /note="IS110 e-value= 5.3e-46 fragment hit coverage=  
 96.88%, length is 295aa with 108 gaps, 0 stops, frame=  
 Minus2"  
 CDS complement(687505..686589)  
 /colour="255 0 0"  
 /evidence=predicted  
 /translation="NGIGIDVSKRRLDIGTTDGQT-----LQVSNPSGYAELSTWL  
 STRP-----AIQIVLEATGGYEQTVLDFLHKA---GHPVIRANALRARRLA-QGLGKV  
 AKTDRLDALVLAQMA--ALVELPSYQPLEPW----QRKLREFVRRARRQTMQALTVARQ  
 QQEMVTDRELRRQMQG-----  
 -----NIIRLQTLVERLGKQISEQVAQ-QPQLAVL  
 KS-----MKGVPALQAVLASYP-ELGQISGK-AIASLVGVAPISHDSG-AMR  
 GRSIHG-GRAEIRQVLYMAAMSAMRHEPRLRDFYRSLRARGK---EGKVAIVAVMRK  
 MLVILNARVRDAE--NGLVPAXGQ"  
 /note="IS110 e-value= 3.4e-46 complete sequence hit  
 coverage= 100%, length is 306aa with 110 gaps, 1 stops,  
 frame= Minus2"  
 CDS complement(687505..686622)  
 /colour="255 0 0"  
 /evidence=predicted  
 /translation="NGIGIDVSKRRLDIGTTDGQT-----LQVSNPSGYAELSTWL  
 STRP-----AIQIVLEATGGYEQTVLDFLHKA---GHPVIRANALRARRLA-QGLGKV  
 AKTDRLDALVLAQMA--ALVELPSYQPLEPW----QRKLREFVRRARRQTMQALTVARQ  
 QQEMVTDRELRRQMQG-----  
 -----NIIRLQTLVERLGKQISEQVAQ-QPQLAVL  
 KS-----MKGVPALQAVLASYP-ELGQISGK-AIASLVGVAPISHDSG-AMR  
 GRSIHG-GRAEIRQVLYMAAMSAMRHEPRLRDFYRSLRARGK---EGKVAIVAVMRK  
 MLVILNARVRD"  
 /note="IS110 e-value= 1e-48 fragment hit coverage=

96.88%, length is 295aa with 108 gaps, 0 stops, frame= Minus2"

CDS complement(504142..504000)  
/colour="255 0 0"  
/evidence=predicted  
/translation="KRYTDEFKIEAVRQIVEYGRPVAEVAERLGVSIHSLYGWKRQQG KGDV"  
/note="IS3\_IS407\_ORF1 e-value= 7.7e-06 fragment hit coverage= 55.81%, length is 48aa with 0 gaps, 0 stops, frame= Minus2"

CDS complement(503989..503862)  
/colour="255 0 0"  
/evidence=predicted  
/translation="VEQDQNAEVRRLKAELRRVTEERDILK--KAAAYFAKGXEQSTP S"  
/note="IS3\_IS51\_ORF1 e-value= 3.2e-08 fragment hit coverage= 14.66%, length is 43aa with 2 gaps, 1 stops, frame= Minus2"

CDS complement(370078..369171)  
/colour="255 0 0"  
/evidence=predicted  
/translation="FGIGIDVSKATLDVAVHGEQ-----FRQFSNDKRGFVRLIRWL KTW P-----IKQVVLEASGGYERAALDVLHAA---GLPMVRINPARARRFAQGT-GRA AKTDRLDATVLAQMAHLLPLTRYVP--PAPW---QORLAEFAQCRRQLVQMRVSEMQR LRRLVDPDLIA-----  
-----MKQRHIAQLSDDLKQLDKAIAEQLEGQPGW KNIGA-----LKG VGPILISTLACELP-ELGSLGSK-AIASLVGLAPMNRESG-TWQ GXRRISG-GRAVVREALYMAALTAIRYEPRLRAFYAGLKAKGK---ASKVALVAVMRK MLVILNARKR-----DAEVALGCP"  
/note="IS110 e-value= 6.9e-48 complete sequence hit coverage= 100%, length is 303aa with 113 gaps, 1 stops, frame= Minus2"

CDS complement(370078..369204)  
/colour="255 0 0"  
/evidence=predicted  
/translation="FGIGIDVSKATLDVAVHGEQ-----FRQFSNDKRGFVRLIRWL KTW P-----IKQVVLEASGGYERAALDVLHAA---GLPMVRINPARARRFAQGT-GRA AKTDRLDATVLAQMAHLLPLTRYVP--PAPW---QORLAEFAQCRRQLVQMRVSEMQR LRRLVDPDLIA-----  
-----MKQRHIAQLSDDLKQLDKAIAEQLEGQPGW KNIGA-----LKG VGPILISTLACELP-ELGSLGSK-AIASLVGLAPMNRESG-TWQ GXRRISG-GRAVVREALYMAALTAIRYEPRLRAFYAGLKAKGK---ASKVALVAVMRK MLVILNAR"  
/note="IS110 e-value= 4.1e-51 fragment hit coverage= 96.15%, length is 292aa with 108 gaps, 1 stops, frame= Minus2"

CDS complement(27022..25944)  
/colour="255 0 0"  
/evidence=predicted  
/translation="VQARCGXAGQPAGRQLCPGGPGAGDPGC-IADPLEAGGPEPGpg glRWHRDAPGRGTGAAQARAGPGE-EGAGFFARSGDVLCOGIILR-----YQVI ERCRDEFPVRLMCRCLRV SASGYDWSKRLPSARERDNORLLGRIELHEDSRGTLGA GRMHEDLA---EEGETASLNRVARLMTDGLQGWRPK-----RRGQRGKPAItppgv RNLLERDFTALEPETRWVTDITELKTR-QGKLYLCIVLDFDQRVVGWSMHRQDRQM VIRAVQMAVWQRQGSHPILHS-----DRGSQFRSGDYQRYLAANGLVCSMSAVGHCG DNAACEGFFGLLKRErvY--RMTYPTLDAARADVFEYIERFHNPRM----- RRRVARQ"  
/note="IS3\_IS150\_ORF2 e-value= 1.6e-25 complete sequence hit coverage= 100%, length is 360aa with 39 gaps, 1 stops, frame= Minus2"



CDS complement(26815..25917)  
/colour="255 0 0"  
/evidence=predicted  
/translation="AGFFARSGDVLCOgIILRYQVIERCDEFPPVRLMCRCLRVsSASG  
YYDWSKRLPSARERDnQRLLGRIRELHEDSRGTLGAGRMHEDLAEGETASLNrVARL  
MATDGLQGWPPrPKR--RGQRGKPALTPPGVrNLLERDFTALEPETRWVTDITELKT--  
RQgKLYLCIVLDLFDQRVVGWSMHRQDRQMVIRAVQMAVWQ-RQgSHPLILHSDRGS  
QFRSGDYQRYLAANGLVCSMSAVGHCGDNAACEGFFGLLKRERVYRMTYPTLD--AAR  
ADVFEYIERFHNP---RMRRRVARQDQKFSALLQ"  
/note="IS3\_IS150\_ORF1 e-value= 1.5e-33 complete sequence  
hit coverage= 100%, length is 300aa with 10 gaps, 0  
stops, frame= Minus2"

CDS complement(26779..25851)  
/colour="255 0 0"  
/evidence=predicted  
/translation="QGIILRYQVIERCd--EFPVRLMCRCLRVs---ASGYDWSKR  
LPSARERDNQRLLGRIRELHEDSRG-----TLGAGRMHEDLAEGETASLNrVARLMA  
TDGLQGW--PRPKRRGQRGKPALTPPgvrNLLERDFTALEPETRWVTDITELKTRQgK  
LYLCIVLDLFDQRVVGWSMHRQDRQMVIRAVQMAVWQRQGS-----HPLILHSDRGS  
QFRSGDYQRYLAANGLVCSMSAVGHCGDNAACEGFFGLLKRERVYRMTYPTLDAARAD  
VFEYIERFHNPmRRRVARQDqkfsallQPSVISGXNPNSGAGXGGEARLS"  
/note="IS3\_IS51\_ORF2 e-value= 9.6e-57 complete sequence  
hit coverage= 100%, length is 310aa with 17 gaps, 2  
stops, frame= Minus2"

CDS complement(26761..25968)  
/colour="255 0 0"  
/evidence=predicted  
/translation="YQVIERCDEFPPVRLMCRCLRVsSASGYDWS-----KRLPSARE  
RDnQRLLGRIRELHEDSRGTLGAGRMHEDLAEGETASLNrVARLMArMATDGLQGWPPrPK  
RRGQRgKPALTPPGVrNLLERDFTALEPETRWVTDITELKTRQgKLYLCIVLDLFDQR  
VVGWSMHRQDRQMV-IRAVQMAVWQRQgSH----PLILHSDRGSQFRSGDYQRYLAA  
NGLVCSMSAVGHCGDNAACEGFFGLLKRERVYR----MTYPTLDAARADVFEYIERFH  
N-PR"  
/note="IS3\_IS51\_ORF1 e-value= 1.7e-73 fragment hit  
coverage= 90.88%, length is 265aa with 15 gaps, 0 stops,  
frame= Minus2"

CDS complement(26761..25902)  
/colour="255 0 0"  
/evidence=predicted  
/translation="YQVIERCDEFPPVRLMCRCLRVsSASGYDWS-----KRLPSARE  
RDnQRLLGRIRELHEDSRGTLGAGRMHEDLAEGETASLNrVARLMArMATDGLQGWPPrPK  
RRGQRgKPALTPPGVrNLLERDFTALEPETRWVTDITELKTRQgKLYLCIVLDLFDQR  
VVGWSMHRQDRQMV-IRAVQMAVWQRQgSH----PLILHSDRGSQFRSGDYQRYLAA  
NGLVCSMSAVGHCGDNAACEGFFGLLKRERVYR----MTYPTLDAARADVFEYIERFH  
NPRMRRRVARQDQK-----FSALLQPSVIS"  
/note="IS3\_IS51\_ORF1 e-value= 7.6e-67 complete sequence  
hit coverage= 100%, length is 287aa with 21 gaps, 0  
stops, frame= Minus2"

CDS complement(26758..25986)  
/colour="255 0 0"  
/evidence=predicted  
/translation="QVIERCDEFPPVRLMCRCLRVsSASGYDWSKRLPSARERDNQRL  
LGRIRELHEDSRGTLGAGRMHEDLA---EEGETASLNrVARLMArMATDGLQGWPPrPK---  
--RRGQRGKPALtppgvrNLLERDFTALEPETRWVTDITELKTR-QGKLYLCIVLDLFD  
QRVVGWSMHRQDRQMVIRAVQMAVWQRQgSHPLILHS-----DRGSQFRSGDYQRY  
LAANGLVCSMSAVGHCGDNAACEGFFGLLKRERVY--RMTYPTLDAARADVFEYIE"  
/note="IS3\_IS150\_ORF2 e-value= 1.7e-58 fragment hit  
coverage= 68.89%, length is 258aa with 16 gaps, 0 stops,  
frame= Minus2"

CDS complement(26758..25965)

```

/colour="255 0 0"
/evidence=predicted
/translation="QVIERCRDEFFVRLMCRCLRVASASGYDWSKR--LPSARERDNO
RLLGRIRELHEDSRGTLGAGRMHEDLA-EEGETASLNRVARLMATDGLQGWPRPKRRG
QRGKpALTpPGVRNLLERDFTALEPETRWVTDITELKTRQGKLYLCIVLDFDQRVVG
WSMHHRQDRQMVIRAVQMAVWQROGSHPLILHSDRGSQFRSGDYQRYLAANGLVCSMS
AVGHCGDNAACEGFFGLLK--RERVYRMTYPTLDAARADVFEYIERFHNP-RM"
/note="IS3_IS3_ORF1      e-value= 4e-75 fragment hit
coverage=
94.06%, length is 265aa with 6 gaps, 0 stops, frame=
Minus2"
CDS      complement(26758..25926)
/colour="255 0 0"
/evidence=predicted
/translation="QVIERCRDEFFVRLMCRCLRVASASGYDWSKR--LPSARERDNO
RLLGRIRELHEDSRGTLGAGRMHEDLA-EEGETASLNRVARLMATDGLQGWPRPKRRG
QRGKpALTpPGVRNLLERDFTALEPETRWVTDITELKTRQGKLYLCIVLDFDQRVVG
WSMHHRQDRQMVIRAVQMAVWQROGSHPLILHSDRGSQFRSGDYQRYLAANGLVCSMS
AVGHCGDNAACEGFFGLLK--RERVYRMTYPTLDAARADVFEYIERFHNP-RMRRRVA
----RQDQKFS"
/note="IS3_IS3_ORF1      e-value= 2.4e-72 complete sequence
hit coverage= 100%, length is 278aa with 10 gaps, 0
stops, frame= Minus2"
CDS      complement(26746..25950)
/colour="255 0 0"
/evidence=predicted
/translation="RCRDEFFVRLMCRCLRVASASGYDWSKRLPSARERDNOQLLGRI
RELHEDSRGTLGAGRMHEDLAEGETASLNRVARLMATDGLQGWPRPKRRGQRGK--P
ALTPPgvrNLLERDFTALE--PETRWVTDITELKTRQGKLYLCIVLDFDQRVVGWSM
HHRQDRQMVIRAVQMAVWQ----RQGSHPILHSDRGSQFRSGDYQRYLAANGLVCSM
SAVGHCGDNAACEGFFGLLKREERVYRMTYPTLDAARADVFEYIERFHNPpRMRRRVA"
/note="IS3_IS3_ORF2      e-value= 2.2e-69 fragment hit
coverage= 93.75%, length is 266aa with 8 gaps, 0 stops,
frame= Minus2"
CDS      complement(26746..25929)
/colour="255 0 0"
/evidence=predicted
/translation="RCRDEFFVRLMCRCLRVASASGYDWSKRLPSARERDNOQLLGRI
RELHEDSRGTLGAGRMHEDLAEGETASLNRVARLMATDGLQGWPRPKRRGQRGK--P
ALTPPgvrNLLERDFTALE--PETRWVTDITELKTRQGKLYLCIVLDFDQRVVGWSM
HHRQDRQMVIRAVQMAVWQ----RQGSHPILHSDRGSQFRSGDYQRYLAANGLVCSM
SAVGHCGDNAACEGFFGLLKREERVYRMTYPTLDAARADVFEYIERFHNPpRMRRRVA--
-----RQDQKFS"
/note="IS3_IS3_ORF2      e-value= 2.6e-66 complete sequence
hit coverage= 100%, length is 273aa with 19 gaps, 0
stops, frame= Minus2"
CDS      complement(26725..25971)
/colour="255 0 0"
/evidence=predicted
/translation="VRLMCRCLRVASASGYDWSKRLPSARERDNOQLLGRIRELH
EDSRG-----TLGAGRMHEDLAEGETASLNRVARLMATDGLQGW--PRPKRRGQRGK
PALTPPgvrNLLERDFTALEPETRWVTDITELKTRQGKLYLCIVLDFDQRVVGWSMH
HRQDRQMVIRAVQMAVWQROGS-----HPLILHSDRGSQFRSGDYQRYLAANGLVCSM
SAVGHCGDNAACEGFFGLLKREERVYRMTYPTLDAARADVFEYIERFHNP"
/note="IS3_IS51_ORF2     e-value= 1.5e-73 fragment hit
coverage= 83.28%, length is 252aa with 15 gaps, 0 stops,
frame= Minus2"
CDS      complement(26695..25974)
/colour="255 0 0"
/evidence=predicted

```

```

/translation="SASGYDWSKRLPSARERDnQRLLGRIRELHEDSRGTLGAGRMH
EDLAEGETASLN RVARLMATDGLQGWRPKR--RGQRGKPALTPPGVrNLLERDFTA
LEPETRWVTDITELKT--RQKLYLCIVLDFDQRVVGVSMHHRQDRQMVIRAVQMAV
WQ-RQGSHPILHSDRGSQFRSGDYQRYLAANGLVCSMSAVGHCGDNAACEGFFGLLK
RERVYRMTYPTLD--AARADVFEYIERFHN"
/note="IS3_IS150_ORF1 e-value= 2.4e-37 fragment hit
coverage= 80.39%, length is 241aa with 7 gaps, 0 stops,
frame= Minus2"
CDS complement(4665888..4665734)
/colour="255 0 0"
/evidence=predicted
/translation="QLTFGDTQGLGKRKQTRREILLYEVDXVVPWKALLARIEPHYP-
RSGRVGQRA"
/note="IS5_IS5 e-value= 3.8e-15 fragment hit coverage=
12.56%, length is 52aa with 1 gaps, 1 stops, frame=
Minus3"
CDS complement(3123708..3122633)
/colour="255 0 0"
/evidence=predicted
/translation="-SSAVRLSRPAGRQLCPGGPGAGDPGC-IADPLEAGGPEPGp
glRWHRDAPGRGTGAAQARAGPGE-EGAGFFARSGDVLCOGIILR-----YQVI
ERCRDEFPVRLMCRCRLVSASGYDWSKRLPSARERDnQRLLGRIRELHEDSRGTLGA
GRMHEDLA---EEGETASLN RVARLMATDGLQGWRPK-----RRGQRGKPALtpg
vRNLLERDFTALEPETRWVTDITELKTR-QGKLYLCIVLDFDQRVVGVSMHHRQDRQ
M VIRAVQMAVWQRQGSHPILHS-----DRGSQFRSGDYQRYLAANGLVCSMSAVGH
CG DNAACEGFFGLLKRErvY--RMTYPTLDAARADVFEYIERFHNPRM-----
RRRVARQ"
/note="IS3_IS150_ORF2 e-value= 8.1e-26 complete sequence
hit coverage= 100%, length is 359aa with 40 gaps, 0
stops, frame= Minus3"
CDS complement(3123504..3122606)
/colour="255 0 0"
/evidence=predicted
/translation="AGFFARSGDVLCOGIILRYQVIERCRDEFPVRLMCRCRLvSAS
GYDWSKRLPSARERDnQRLLGRIRELHEDSRGTLGAGRMHEDLAEGETASLN RVAR
LMATDGLQGWRPKR--RGQRGKPALTPPGVrNLLERDFTALEPETRWVTDITELKT--
RQKLYLCIVLDFDQRVVGVSMHHRQDRQMVIRAVQMAVWQ-RQGSHPILHSDRGS
QFRSGDYQRYLAANGLVCSMSAVGHCGDNAACEGFFGLLKRErvYRMTYPTLD--AAR
ADVFEYIERFHNp---RMRRRVARQDQKFSALLQ"
/note="IS3_IS150_ORF1 e-value= 1.5e-33 complete sequence
hit coverage= 100%, length is 300aa with 10 gaps, 0
stops, frame= Minus3"
CDS complement(3123468..3122558)
/colour="255 0 0"
/evidence=predicted
/translation="QGIILRYQVIERCRD--EFPVRLMCRCRLVS---ASGYDWSKR
LPSARERDnQRLLGRIRELHEDSRG-----TLGAGRMHEDLAEGETASLN RVARLMA
TDGLQGW--PRPKRRGQRGKPALTPPGVrNLLERDFTALEPETRWVTDITELKTRQ
GK LYLCIVLDFDQRVVGVSMHHRQDRQMVIRAVQMAVWQRQGS-----HPLILHSDRGS
QFRSGDYQRYLAANGLVCSMSAVGHCGDNAACEGFFGLLKRErvYRMTYPTLDAARAD
VFEYIERFHNPRmRRRVARQD---QKFSALLqpsVISGXNPRQSRTR"
/note="IS3_IS51_ORF2 e-value= 2.2e-57 complete sequence
hit coverage= 100%, length is 304aa with 20 gaps, 1
stops, frame= Minus3"
CDS complement(3123450..3122657)
/colour="255 0 0"
/evidence=predicted
/translation="YQVIERCRDEFPVRLMCRCRLVSASGYDWS-----KRLPSARE
RDnQRLLGRIRELHEDSRGTLGAGRMHEDLAEGETASLN RVARLMATDGLQGWRPK
RRGQRGKPALTPPGVrNLLERDFTALEPETRWVTDITELKTRQKLYLCIVLDFDQ
R

```

VVGWSMHHRQDRQMV-IRAVQMAVWQROGSH----PLILHSDRGSQFRSGDYQRYLAA  
NGLVCSMSAVGHCGDNAACEGFFGLLKREVR----MTYPTLDAARADVFEYIERFH  
N-PR"

/note="IS3\_IS51\_ORF1 e-value= 1.7e-73 fragment hit  
coverage= 90.88%, length is 265aa with 15 gaps, 0 stops,  
frame= Minus3"  
CDS complement(3123450..3122591)  
/colour="255 0 0"  
/evidence=predicted  
/translation="YQVIERCDEFVRLMCRCLRVASAGYYDWS-----KRLPSARE  
RDNQRLLGRIRELHEDSRGTGAGRMHEDLAEGETASLNRVARLMATDGLQGWPRPK  
RRGQRGKPALTPPGVRNLLERDFTALEPETRWVTDITELKTRQGKLYLCIVLDFDQR  
VVGWSMHHRQDRQMV-IRAVQMAVWQROGSH----PLILHSDRGSQFRSGDYQRYLAA  
NGLVCSMSAVGHCGDNAACEGFFGLLKREVR----MTYPTLDAARADVFEYIERFH  
NPRMRRRVARQDQK-----FSALLQPSVIS"

/note="IS3\_IS51\_ORF1 e-value= 7.6e-67 complete sequence  
hit coverage= 100%, length is 287aa with 21 gaps, 0  
stops, frame= Minus3"

CDS complement(3123447..3122675)  
/colour="255 0 0"  
/evidence=predicted  
/translation="QVIERCDEFVRLMCRCLRVASAGYYDWSKRLPSARERDNQRL  
LGRIRELHEDSRGTGAGRMHEDLA---EEGETASLNRVARLMATDGLQGWPRPK---  
--RRGQRGKPALtppgvrNLLERDFTALEPETRWVTDITELKTR-QGKLYLCIVLDF  
DQRVVGWSMHHRQDRQMVIRAVQMAVWQROGSHPLILHS-----DRGSQFRSGDYQRY  
LAANGLVCSMSAVGHCGDNAACEGFFGLLKREVR--RMTYPTLDAARADVFEYIE"

/note="IS3\_IS150\_ORF2 e-value= 1.7e-58 fragment hit  
coverage= 68.89%, length is 258aa with 16 gaps, 0 stops,  
frame= Minus3"

CDS complement(3123447..3122654)  
/colour="255 0 0"  
/evidence=predicted  
/translation="QVIERCDEFVRLMCRCLRVASAGYYDWSKR--LPSARERDNQ  
RLLGRIRELHEDSRGTGAGRMHEDLA-EEGETASLNRVARLMATDGLQGWPRPKRRG  
QRGKpALTpPGVRNLLERDFTALEPETRWVTDITELKTRQGKLYLCIVLDFDQRVVG  
WSMHHRQDRQMVIRAVQMAVWQROGSHPLILHSDRGSQFRSGDYQRYLAANGLVCSMS  
AVGHCGDNAACEGFFGLLK--RERVYRMTYPTLDAARADVFEYIERFHNP-RM"

/note="IS3\_IS3\_ORF1 e-value= 4e-75 fragment hit  
coverage=  
94.06%, length is 265aa with 6 gaps, 0 stops, frame=  
Minus3"

CDS complement(3123447..3122615)  
/colour="255 0 0"  
/evidence=predicted  
/translation="QVIERCDEFVRLMCRCLRVASAGYYDWSKR--LPSARERDNQ  
RLLGRIRELHEDSRGTGAGRMHEDLA-EEGETASLNRVARLMATDGLQGWPRPKRRG  
QRGKpALTpPGVRNLLERDFTALEPETRWVTDITELKTRQGKLYLCIVLDFDQRVVG  
WSMHHRQDRQMVIRAVQMAVWQROGSHPLILHSDRGSQFRSGDYQRYLAANGLVCSMS  
AVGHCGDNAACEGFFGLLK--RERVYRMTYPTLDAARADVFEYIERFHNP-RMRRVA  
----RQDQKFS"

/note="IS3\_IS3\_ORF1 e-value= 2.4e-72 complete sequence  
hit coverage= 100%, length is 278aa with 10 gaps, 0  
stops, frame= Minus3"

CDS complement(3123435..3122639)  
/colour="255 0 0"  
/evidence=predicted  
/translation="RCRDEFVRLMCRCLRVASAGYYDWSKRLPSARERDNQRLGRI  
RELHEDSRGTGAGRMHEDLAEGETASLNRVARLMATDGLQGWPRPKRRGQRGK--P  
ALTPPgvrNLLERDFTALE--PETRWVTDITELKTRQGKLYLCIVLDFDQRVVGWSM  
HHRQDRQMVIRAVQMAVWQ----RQGSHPILHSDRGSQFRSGDYQRYLAANGLVCSM

SAVGHCGDNAACEGFFGLLKREVRMYPTLDAARADVFEYIERFHNpRMRRRVA"  
 /note="IS3\_IS3\_ORF2 e-value= 2.2e-69 fragment hit  
 coverage= 93.75%, length is 266aa with 8 gaps, 0 stops,  
 frame= Minus3"  
 CDS complement(3123435..3122618)  
 /colour="255 0 0"  
 /evidence=predicted  
 /translation="RCRDEFPVRLMCRCLRVVSASGYDWSKRLPSARERDNQRLLGRI  
 RELHEDSRGTLGAGRMHEDLAEGETASLNRVARLMATDGLQGWPRPKRRGQRGK--P  
 ALTPPgvrNLLERDFTALE--PETRWVTDITELKTRQGKLYLCIVLDFDQRVVGSWMH  
 HHRQDRQMVIRAVQMAVWQ----RQGSHPILHSDRGSQFRSGDYQRYLAANGLVCSM  
 SAVGHCGDNAACEGFFGLLKREVRMYPTLDAARADVFEYIERFHNpRMRRRVA--  
 -----RQDQKFS"  
 /note="IS3\_IS3\_ORF2 e-value= 2.6e-66 complete sequence  
 hit coverage= 100%, length is 273aa with 19 gaps, 0  
 stops, frame= Minus3"  
 CDS complement(3123414..3122660)  
 /colour="255 0 0"  
 /evidence=predicted  
 /translation="VRLMCRCLRVVS---ASGYDWSKRLPSARERDNQRLLGRIRELH  
 EDSRG-----TLGAGRMHEDLAEGETASLNRVARLMATDGLQGW--PRPKRRGQRGK  
 PALTPPgvrNLLERDFTALEPETRWVTDITELKTRQGKLYLCIVLDFDQRVVGSWMH  
 HRQDRQMVIRAVQMAVWQRQGS-----HPLILHSDRGSQFRSGDYQRYLAANGLVCSM  
 SAVGHCGDNAACEGFFGLLKREVRMYPTLDAARADVFEYIERFHNp"  
 /note="IS3\_IS51\_ORF2 e-value= 1.5e-73 fragment hit  
 coverage= 83.28%, length is 252aa with 15 gaps, 0 stops,  
 frame= Minus3"  
 CDS complement(3123384..3122663)  
 /colour="255 0 0"  
 /evidence=predicted  
 /translation="SASGYDWSKRLPSARERDnQRLLGRIRELHEDSRGTLGAGRMH  
 EDLAEGETASLNRVARLMATDGLQGWPRPKR--RGQRGKPALTPPgvrNLLERDFTA  
 LEPETRWVTDITELKT--RQKLYLCIVLDFDQRVVGSWMHHRQDRQMVIRAVQMAV  
 WQ-RQGSHPILHSDRGSQFRSGDYQRYLAANGLVCSMSAVGHCGDNAACEGFFGLLK  
 RERVYRMYPTLD--AARADVFEYIERFHN"  
 /note="IS3\_IS150\_ORF1 e-value= 2.4e-37 fragment hit  
 coverage= 80.39%, length is 241aa with 7 gaps, 0 stops,  
 frame= Minus3"  
 CDS complement(2403027..2402087)  
 /colour="255 0 0"  
 /evidence=predicted  
 /translation="NARLTVHSRALLIRRILHEGLRPEEAAQACGVSVRTAYKWLARF  
 RQFGAPGLENRSSRPHTPHATPAPVIEQIKEHR-RKRQTYLTISKALG-----  
 VGHSTISRLMRAHGLNRLCRLEPPK-----EVIR-----YEYDQPGGLLHLDIKK  
 -----LGNFQRPGHRTDakRRGNAAGGGWGYVHVAIDDHSRVAFSSVHPNEQAETACQ  
 ALLGALQYYASLGIT-FKRILTDNGACYRST----AFAKLLKSLGIKHIRTTPYTPRT  
 NGKAERFIQTSLEWAYARE---YASSDQRNSVLTQWLHHYNWHRPHM--GIGGQPPI  
 SRVLLNNVVGLHSXSTNK"  
 /note="IS481 e-value= 4.3e-95 complete sequence hit  
 coverage= 100%, length is 314aa with 38 gaps, 1 stops,  
 frame= Minus3"  
 CDS complement(2403027..2402087)  
 /colour="255 0 0"  
 /evidence=predicted  
 /translation="NARLTVHSRALLIRRILHEGLRPEEAAQACGVSVRTAYKWLARF  
 RQFGAPGLENRSSRPHTPHATPAPVIEQIKEHR-RKRQTYLTISKALG-----  
 VGHSTISRLMRAHGLNRLCRLEPPK-----EVIR-----YEYDQPGGLLHLDIKK  
 -----LGNFQRPGHRTDakRRGNAAGGGWGYVHVAIDDHSRVAFSSVHPNEQAETACQ  
 ALLGALQYYASLGIT-FKRILTDNGACYRST----AFAKLLKSLGIKHIRTTPYTPRT  
 NGKAERFIQTSLEWAYARE---YASSDQRNSVLTQWLHHYNWHRPHM--GIGGQPPI

SRVLLNNVVGLHSXSTNK"  
 /note="IS481 e-value= 1.1e-95 complete sequence hit  
 coverage= 100%, length is 314aa with 38 gaps, 1 stops,  
 frame= Minus3"  
 CDS complement(2402406..2402141)  
 /colour="255 0 0"  
 /evidence=predicted  
 /translation="RILTDNGACYRSTAFKLLKSLGIKHIRTkPYTPRTNGKAERFI  
 QTSLEWAY--AREYASSDQRNSVLTQWLHhYNWHRPHMGIGGQPPI"  
 /note="IS3\_IS150\_ORF2 e-value= 1.8e-10 fragment hit  
 coverage= 23.39%, length is 89aa with 2 gaps, 0 stops,  
 frame= Minus3"  
 CDS complement(2402211..2402144)  
 /colour="255 0 0"  
 /evidence=predicted  
 /translation="VLTQWLHhYNWHRPHMGIGGQPP"  
 /note="IS3\_IS407\_ORF2 e-value= 4.1e-07 fragment hit  
 coverage= 6.69%, length is 23aa with 0 gaps, 0 stops,  
 frame= Minus3"  
 CDS complement(1723680..1722572)  
 /colour="255 0 0"  
 /evidence=predicted  
 /translation="VQDRGGPT-----DRXVRPSGSGGCRAATgRVDPXSLRLEAATR  
 QRRCPACRAGPERGS-APPQGXATQGHXRARHPKKSRRVL---CKGVRAKYAFMKQH  
 ADEFGLAAMCRMLGVHRSGYYAWLKEPASARDKDDQRLGLIKHSWLESGSVYGRKv  
 TTDLR---ELGETCSRHRVARLMKSEGLRAMVGYGRRPRPLSGPVGSVAKNVLARGFK  
 VSEPNRAWVTDITYIRTY-DGFLYLAVVLDLFSRQVVGWATRPTQHTDLVLQALLAAV  
 WRRKPSGLLLHS-----DQGTQFTSEDWQSFLREHDIVCSMSRRGNCHDNAAMESFF  
 QLLKRERIK--RRIYSNHDEARADVFOYIEMfYNPKRRHSSNDGLSPVEFEKQYALN"  
 /note="IS3\_IS150\_ORF2 e-value= 1.2e-45 complete sequence  
 hit coverage= 100%, length is 370aa with 21 gaps, 4  
 stops, frame= Minus3"  
 CDS complement(1723617..1722548)  
 /colour="255 0 0"  
 /evidence=predicted  
 /translation="--ATGRVDPXSLRLEAATRQ---RRCWPACRAG-PERGSAPPQG  
 XATQGHXRARhPKKSRRVLCKGVRAKYAFMKQHAdEFGLAAMCRMLGVHRSGYYAWLK  
 E-PASARDKddQRLGLIKHSWLEsgsvYGRKvTTDLRELGETCSRHRVARLMKSEG  
 LRAmvgygRRPR-PLSGPVGSVAKNvLARgfkVSEPNRAWVTDITYIRTYDG--FLYL  
 AVVLDLFSRQVVGWATRPTQHTDLVLQALLAAVWRRkPSPgLLLHSDQGTQFTSEDWQ  
 SFLREHDIVCSMSRRGNCHDNAAMESFFQLLKRERIKRRIYSNHDEARADVFOYIEMf  
 YNPKRRHSSNDGLSPVEFEKQYALNGXRLSRKP"  
 /note="IS3\_IS407\_ORF2 e-value= 2.1e-06 complete sequence  
 hit coverage= 100%, length is 357aa with 10 gaps, 4  
 stops, frame= Minus3"  
 CDS complement(1723479..1722575)  
 /colour="255 0 0"  
 /evidence=predicted  
 /translation="ARHPKKSRRVLCKgVRAKYAFMKQHAdEFGLAAMCRMLGVHRsg  
 YYAWLKePASARDKDDQRLGLIKHSWLESGSVYGRKvTTDLRELGETCSRHRVARL  
 MKSEGLRAMVGYGR--RPRPLSGPVGSVAKNVLARGFKVSEPNRAWVTDITYIRT--Y  
 DGFLYLAVVLDLFSRQVVGWATRPTQHTDLVLQALLAAVWR-RKPSGLLLHSDQGTQ  
 FTSEDWQSFLREHDIVCSMSRRGNCHDNAAMESFFQLLKRERIKRRIYSNHd--EARA  
 DVFOYIEMfYNPKRRHSSNDGLSPVEFEKQYAL"  
 /note="IS3\_IS150\_ORF1 e-value= 1.4e-57 complete sequence  
 hit coverage= 100%, length is 302aa with 7 gaps, 0 stops,  
 frame= Minus3"  
 CDS complement(1723455..1722563)  
 /colour="255 0 0"  
 /evidence=predicted

```

/translation="RVLCKGVRAKYAFMkqhADEFGLAAMCRMLGVHRSGYYAWLK--
----EPASARDKDDQRLGLIKHSWLESGSVYGHRKVTDLRELGETCSR-----HRV
ARLMkseGLRAMVgYGRPRPLSGP---VGSVAknvlargfkVSEPRAWVTDITYIR
TYDG-FLYLAVVLDLFSRQVVGWATRPTQ--HTDLVLQALLAAVWRR-----KPSPGLL
LH-SDQGTQFTSEDWQSFRLREHDIVCSMSRRGNCHDNAAMESFFQLLKRERIkrRIYS
NHDEARA--DVFQYIEMfYNPkRRHSSNDGLSPVEFEKQYALNGXR"
/note="IS3_IS2_ORF2      e-value= 1.4e-07 complete sequence
hit coverage= 100%, length is 298aa with 24 gaps, 1
stops, frame= Minus3"
CDS      complement(1723452..1722575)
/colour="255 0 0"
/evidence=predicted
/translation="VLCKgVRAKYAFMKQHADEFGLAAMCRMLGVHRsgYYAWLKePA
SARDKDDQRLGLIKHSWLESGSVYGHRKVTDLRELGETCSRHRVARLMKSEGLRAM
VGYGR--RPRPLSGPVGSVAKNVLARGFKVSEPRAWVTDITYIRT--YDGFlyLAVV
LDLFSRQVVGWATRPTQHTDLVLQALLAAVWR--RKPSPLLLHSDQGTQFTSEDWQSF
LREHDIVCSMSRRGNCHDNAAMESFFQLLKRERIKRRIYSNH--EARADVFQYIEMF
YNPKRRHSSNDGLSPVEFEKQYAL"
/note="IS3_IS150_ORF1   e-value= 5.1e-57 fragment hit
coverage= 97.06%, length is 293aa with 7 gaps, 0 stops,
frame= Minus3"
CDS      complement(1723443..1722536)
/colour="255 0 0"
/evidence=predicted
/translation="KGVRAKYAFMKQHAD--EFGLAAMCRMLGVH---RSGYYAWLKE
PASARDKDDQRLGLIKHSWLESGS-----VYGHRKVTDLRELGETCSRHRVARLMK
SEGLRAMVGYGRPRPLSGPVGSVAKNVLARGFKVSEPRAWVTDITYIRTYDGFlyL
AVVLDLFSRQVVGWATRPTQHTDLVLQALLAAVWRRKPS-----PGLLLHSDQGTQFT
SEDWQSFRLREHDIVCSMSRRGNCHDNAAMESFFQLLKRERIKRRIYSNHDEARADVFO
YIEMfYNPkRRHSSNDGLSPVEFEKQYALNGxRLSRKPWAH"
/note="IS3_IS51_ORF2    e-value= 2.7e-134 complete
sequence hit coverage= 100%, length is 303aa with 15 gaps, 0
stops, frame= Minus3"
CDS      complement(1723425..1722581)
/colour="255 0 0"
/evidence=predicted
/translation="YAFMKQHADEFGLAAMCRMLGVHRSGYYAWL-----KEPASARD
KDDQRLGLIKHSWLESGSVYGHRKVTDLRELGETCSRHRVARLMKSEGLRAMVGYG
RRPRPLSGPVGSVAKNVLARGFKVSEPRAWVTDITYIRTYDGFlyLAVVLDLFSRQV
VGWATRPTQHTDLV-LQALLAAVWRRKPSP-----GLLLHSDQGTQFTSEDWQSFRLREH
DIVCSMSRRGNCHDNAAMESFFQLLKRERIKR---RIYSNHDEARADVFQYIEMfYN
PKRRHSSNDGLSPVEFEKQY"
/note="IS3_IS51_ORF1    e-value= 3.9e-110 fragment hit
coverage= 96.42%, length is 282aa with 14 gaps, 0 stops,
frame= Minus3"
CDS      complement(1723425..1722548)
/colour="255 0 0"
/evidence=predicted
/translation="YAFMKQHADEFGLAAMCRMLGVHRSGYYAWL-----KEPASARD
KDDQRLGLIKHSWLESGSVYGHRKVTDLRELGETCSRHRVARLMKSEGLRAMVGYG
RRPRPLSGPVGSVAKNVLARGFKVSEPRAWVTDITYIRTYDGFlyLAVVLDLFSRQV
VGWATRPTQHTDLV-LQALLAAVWRRKPSP-----GLLLHSDQGTQFTSEDWQSFRLREH
DIVCSMSRRGNCHDNAAMESFFQLLKRERIKR---RIYSNHDEARADVFQYIEMfYN
PKRRHSSNDGLSPVEFEKQYALNGXRLSRKP"
/note="IS3_IS51_ORF1    e-value= 3.7e-108 complete
sequence hit coverage= 100%, length is 293aa with 14 gaps, 1
stops, frame= Minus3"
CDS      complement(1723422..1722578)

```

```

/colour="255 0 0"
/evidence=predicted
/translation="AFMKQHADEFGLAAMCRMLGVHRSGYYAWLKE--PASARDKDDQ
RLGLIKHSWLESGSVYGHRKVTDLR-ELGETCSRHRVARLMKSEGLRAMVGYG-RR
PRPLSgPVGsvaknvlargfkvsepnravvtdityirtydgflylavvldlfsrqvvg
WATRPTQHTDLVLQALLAAVWRRKPSGLLLHSDQGTQFTSEDWQSFLREHDIVCSMS
RRGNCHDNAAMESFFQLLK--RERIKRRIYSNHDEARADVFOYIEMFYNPKRHSSND
GLSPVEFEKQYA"
/note="IS3_IS3_ORF1      e-value= 1.9e-94 complete sequence
hit coverage= 100%, length is 282aa with 6 gaps, 0 stops,
frame= Minus3"
CDS      complement(1723422..1722578)
/colour="255 0 0"
/evidence=predicted
/translation="AFMKQHADEFGLAAMCRMLGVHRSGYYAWLKE--PASARDKDDQ
RLGLIKHSWLESGSVYGHRKVTDLR-ELGETCSRHRVARLMKSEGLRAMVGYG-RR
PRPLSgPVGsvaknvlargfkvsepnravvtdityirtydgflylavvldlfsrqvvg
WATRPTQHTDLVLQALLAAVWRRKPSGLLLHSDQGTQFTSEDWQSFLREHDIVCSMS
RRGNCHDNAAMESFFQLLK--RERIKRRIYSNHDEARADVFOYIEMFYNPKRHSSND
GLSPVEFEKQYA"
/note="IS3_IS3_ORF1      e-value= 4.9e-95 complete sequence
hit coverage= 100%, length is 282aa with 6 gaps, 0 stops,
frame= Minus3"
CDS      complement(1723410..1722566)
/colour="255 0 0"
/evidence=predicted
/translation="QHADEFGLAAMCRMLGVHRSGYYAWLKEPASARDKDDQRLGLI
KHSWLESGSVYGHRKVTDLRELGETCSRHRVARLMKSEGLRAMVGYGRRPRPLSGPV
GSVAK-NVLARGFKVSE--PNRAVVDITYIRTYDGFLYLAVVLDLFSRQVVGWATRP
TQHTDLVLQALLAAVWR----RKPSGLLLHSDQGTQFTSEDWQSFLREHDIVCSMSR
RGNCHDNAAMESFFQLLKRERIKRRIYSNHDEARADVFOYIEMFYNPKRHSSNDGLS
PVEFEKQYALNGX"
/note="IS3_IS3_ORF2      e-value= 7.1e-102 complete
sequence hit coverage= 100%, length is 282aa with 7 gaps, 1 stops,
frame= Minus3"
CDS      complement(1723410..1722566)
/colour="255 0 0"
/evidence=predicted
/translation="QHADEFGLAAMCRMLGVHRSGYYAWLKEPASARDKDDQRLGLI
KHSWLESGSVYGHRKVTDLRELGETCSRHRVARLMKSEGLRAMVGYGRRPRPLSGPV
GSVAK-NVLARGFKVSE--PNRAVVDITYIRTYDGFLYLAVVLDLFSRQVVGWATRP
TQHTDLVLQALLAAVWR----RKPSGLLLHSDQGTQFTSEDWQSFLREHDIVCSMSR
RGNCHDNAAMESFFQLLKRERIKRRIYSNHDEARADVFOYIEMFYNPKRHSSNDGLS
PVEFEKQYALNGX"
/note="IS3_IS3_ORF2      e-value= 2e-102 complete sequence
hit coverage= 100%, length is 282aa with 7 gaps, 1 stops,
frame= Minus3"
CDS      complement(1723398..1722572)
/colour="255 0 0"
/evidence=predicted
/translation="EFGLAAMCRMLGVHRSGYYAWLKEPASARDKDDQRLGLIKHSW
LESGSVYGHRKVTDLR---ELGETCSRHRVARLMKSEGLRAMVGYGRRPRPLSGPVG
svaknvlargfkvsepnravvtdityirty-DGFLYLAVVLDLFSRQVVGWATRPTQH
TDLVLQALLAAVWRRKPSGLLLHS-----DQGTQFTSEDWQSFLREHDIVCSMSRRG
NCHDNAAMESFFQLLKRERIK--RRIYSNHDEARADVFOYIEMFYNPKRHSSNDGLS
PVEFEKQYALN"
/note="IS3_IS150_ORF2    e-value= 1.9e-74 fragment hit
coverage= 73.52%, length is 276aa with 11 gaps, 0 stops,

```



CDS frame= Minus3  
 complement(1723395..1722578)  
 /colour="255 0 0"  
 /evidence=predicted  
 /translation="FGLAAMCRMLGVH---RSGYYAWLKEPASARDKDDQRLGLIKH  
 SWLESGS-----VYGHRKVTDDLRELGETCSRHRVARLMKSEGLRAMVGYGRRRPRPLS  
 GPVGSVAKNVLARGFKVSEPNRAWVTDITYIRTYDGFLYLAVVLDLFSRQVVGWATRP  
 TQHTDLVLQALLAAVWRRKPS-----PGLLLHSDQGTQFTSEDWQSFLREHDIVCSMS  
 RRGNCHDNAAMESFFQLLKREIKRRIYSNHDEARADVFOYIEMFYNPKRRHSSNDGL  
 SPVEFEKQYA"  
 /note="IS3\_IS51\_ORF2 e-value= 7.1e-152 fragment hit  
 coverage= 90.22%, length is 273aa with 13 gaps, 0 stops,  
 frame= Minus3"

CDS complement(526827..525914)  
 /colour="255 0 0"  
 /evidence=predicted  
 /translation="NARLTVHSRALLIRRILHEGLRPEEAAQACGVSVRTAYKWLARF  
 RQFGAPGLENRSSRPHQTPHATPAPVIEQIKEHR-RKRQTYLTISKALG-----  
 VGHSTISRLMRAHGLNRLCRLEPPK-----EVIR-----YEYDQPGGLLHLDIKK  
 -----LGNFQRPGHRTDAKRRGNAAGGGWGYVHVAIDDHSRVAFSSVHPNEQAETACQ  
 ALLGALQYYASLGIT-FKRILTDNGACYRST----AFAKLLKSLGIKHIRTTPRT  
 NGKAERFIQTSLEWAYARE---YASSDQRNSVLTQWLHHYNWHRPHM--GIGGQPPI  
 SRVLLNNVV"  
 /note="IS481 e-value= 6.1e-93 fragment hit coverage=  
 97.44%, length is 305aa with 38 gaps, 0 stops, frame=  
 Minus3"

CDS complement(526827..525887)  
 /colour="255 0 0"  
 /evidence=predicted  
 /translation="NARLTVHSRALLIRRILHEGLRPEEAAQACGVSVRTAYKWLARF  
 RQFGAPGLENRSSRPHQTPHATPAPVIEQIKEHR-RKRQTYLTISKALG-----  
 VGHSTISRLMRAHGLNRLCRLEPPK-----EVIR-----YEYDQPGGLLHLDIKK  
 -----LGNFQRPGHRTDAKRRGNAAGGGWGYVHVAIDDHSRVAFSSVHPNEQAETACQ  
 ALLGALQYYASLGIT-FKRILTDNGACYRST----AFAKLLKSLGIKHIRTTPRT  
 NGKAERFIQTSLEWAYARE---YASSDQRNSVLTQWLHHYNWHRPHM--GIGGQPPI  
 SRVLLNNVVGLHNXQSTL"  
 /note="IS481 e-value= 1.2e-93 complete sequence hit  
 coverage= 100%, length is 314aa with 38 gaps, 1 stops,  
 frame= Minus3"

CDS complement(526206..525941)  
 /colour="255 0 0"  
 /evidence=predicted  
 /translation="RILTDNGACYRSTAFAKLLKSLGIKHIRTTPRTNGKAERFI  
 QTSLEWAY--AREYASSDQRNSVLTQWLHHYNWHRPHMGIGGQPPI"  
 /note="IS3\_IS150\_ORF2 e-value= 1.8e-10 fragment hit  
 coverage= 23.39%, length is 89aa with 2 gaps, 0 stops,  
 frame= Minus3"

CDS complement(526011..525944)  
 /colour="255 0 0"  
 /evidence=predicted  
 /translation="VLTQWLHHYNWHRPHMGIGGQPP"  
 /note="IS3\_IS407\_ORF2 e-value= 4.1e-07 fragment hit  
 coverage= 6.69%, length is 23aa with 0 gaps, 0 stops,  
 frame= Minus3"

//
