# Supplementary material for: TnpPred: A Web Service for the Robust Prediction of Prokaryotic Transposases
Source: Comp Funct Genomics. 2012 Nov 18;2012:678761. doi: 10.1155/2012/678761 (PMC3506888; doi:10.1155/2012/678761)
Supplement: Supplementary file 1 — The Supplementary Materials include the following files: Excel file showing each IS amily HMM profile ROC curve, sensitivity and selectivity. Acaryochloris marina MBIC11017 uid58167 TnpPred annotation in genbank format (.gbk). Stenotrophomonas maltophilia K279a TnpPred annotation in genbank format (.gbk). Acaryochloris marina MBIC11017 uid58167 full report of TnpPred predictions. NC_009925.gbk Chromosome. Stenotrophomonas maltophilia K279a full report of TnpPred predictions. NC_010943.gbk Chromosome. [file 678761.f1.xlsx]

## Sheet: Supplementary File Title
	Supplementary File 1
	Excel file showing each IS amily HMM profile ROC curve, sensitivity and selectivity.

## Sheet: IS1_ORF1
	IS1_ORF1.original.search.original				IS1_ORF1.original.search.uniq				IS1_ORF1.uniq.search.original				IS1_ORF1.uniq.search.uniq
	e-value	FP/N	TP/P		e-value	FP/N	TP/P		e-value	FP/N	TP/P		e-value	FP/N	TP/P
	-	0	0		-	0	0		-	0	0		-	0	0
	1.2e-48	0	0.03125		1.2e-48	0	0.0714286		4.9e-132	0	0.03125		4.9e-132	0	0.0714286
	1.8e-47	0	0.0625		5.4e-46	0	0.142857		6e-130	0	0.0625		5.7e-131	4.20964e-06	0.142857
	1.4e-46	4.20007e-06	0.09375		4.3e-45	0	0.214286		6.6e-130	0	0.09375		6e-130	4.20964e-06	0.214286
	5.4e-46	8.40015e-06	0.125		2.1e-42	0	0.285714		6.4e-110	4.20007e-06	0.125		6.6e-130	4.20964e-06	0.285714
	2.7e-45	1.26002e-05	0.15625		3.2e-41	0	0.357143		6.8e-90	4.20007e-06	0.15625		2.9e-129	4.20964e-06	0.357143
	4.3e-45	1.68003e-05	0.1875		8.1e-41	0	0.428571		3.5e-84	4.20007e-06	0.1875		5.3e-129	4.20964e-06	0.428571
	4.4e-44	2.10004e-05	0.21875		1.1e-40	0	0.5		2.1e-35	7.14013e-05	0.21875		6.3e-123	4.20964e-06	0.5
	2.1e-42	2.52004e-05	0.25		1.9e-40	4.20964e-06	0.571429		1.6e-31	9.66017e-05	0.25		4.1e-34	4.20964e-06	0.571429
	3.2e-41	3.78007e-05	0.28125		2.4e-40	4.20964e-06	0.642857		2.9e-29	9.66017e-05	0.28125		1.6e-31	4.20964e-06	0.642857
	1.1e-40	3.78007e-05	0.3125		9e-40	4.20964e-06	0.714286		1e-24	9.66017e-05	0.3125		5e-21	4.20964e-06	0.714286
	1.6e-40	3.78007e-05	0.34375		5.3e-39	4.20964e-06	0.785714		4.3e-17	0.000105002	0.34375		1.2e-05	4.20964e-06	0.785714
	2.4e-40	4.20007e-05	0.375		6.9e-39	4.20964e-06	0.857143		1.2e-11	0.000109202	0.375		8.7e-05	4.20964e-06	0.857143
	4.5e-40	4.20007e-05	0.46875		1.4e-38	4.20964e-06	0.928571		1.2e-05	0.000109202	0.40625		9.2e-05	4.20964e-06	0.928571
	6.8e-40	4.20007e-05	0.5625		4.7e-24	4.20964e-06	1		3.2e-05	0.000109202	0.4375		0.00011	4.20964e-06	1
	7.3e-40	4.20007e-05	0.59375		100000	0.405995	1		3.4e-05	0.000109202	0.46875		100000	0.361566	1
	7.5e-40	4.20007e-05	0.625		110000	0.435622	1		3.9e-05	0.000109202	0.5625		110000	0.38445	1
	7.7e-40	4.20007e-05	0.65625		120000	0.464601	1		4.1e-05	0.000109202	0.65625		120000	0.40551	1
	9.1e-40	4.20007e-05	0.6875		130000	0.492654	1		4.8e-05	0.000109202	0.6875		130000	0.426538	1
	1.2e-39	4.20007e-05	0.71875		140000	0.519848	1		6e-05	0.000109202	0.71875		140000	0.446538	1
	2e-39	4.20007e-05	0.75		150000	0.546218	1		8.7e-05	0.000109202	0.75		150000	0.466087	1
	2.9e-39	4.20007e-05	0.78125		160000	0.573117	1		9.2e-05	0.000109202	0.78125		160000	0.485515	1
	5.3e-39	4.20007e-05	0.8125		170000	0.600143	1		0.00011	0.000109202	0.8125		170000	0.504816	1
	9.5e-39	4.62008e-05	0.84375		180000	0.627135	1		0.00012	0.000109202	0.84375		180000	0.524146	1
	1.1e-38	5.04009e-05	0.875		190000	0.655904	1		0.0004	0.000113402	0.875		190000	0.54397	1
	1.4e-38	5.04009e-05	0.90625		200000	0.684816	1		0.0024	0.000117602	0.90625		200000	0.565094	1
	1.6e-38	5.4601e-05	0.9375		210000	0.717411	1		0.15	0.000138602	0.9375		210000	0.588356	1
	6.5e-38	5.4601e-05	0.96875		220000	0.756136	1		90	0.000294005	0.96875		220000	0.616384	1
	3.2e-34	5.8801e-05	1		230000	0.818266	1		950	0.00277205	1		230000	0.664054	1
	100000	0.405866	1		240000	1	1		100000	0.361597	1		240000	1	1
	110000	0.435418	1						110000	0.384403	1
	120000	0.464259	1						120000	0.405416	1
	130000	0.492161	1						130000	0.426442	1
	140000	0.519259	1						140000	0.446409	1
	150000	0.54551	1						150000	0.465923	1
	160000	0.572563	1						160000	0.485239	1
	170000	0.599674	1						170000	0.504429	1
	180000	0.626563	1						180000	0.523804	1
	190000	0.655157	1						190000	0.543393	1
	200000	0.683743	1						200000	0.56433	1
	210000	0.716134	1						210000	0.587401	1
	220000	0.753943	1						220000	0.615072	1
	230000	0.812966	1						230000	0.659916	1
	240000	1	1						240000	1	1

## Sheet: IS1_ORF2
	IS1_ORF2.original.search.original				IS1_ORF2.original.search.uniq				IS1_ORF2.uniq.search.original				IS1_ORF2.uniq.search.uniq
	e-value	FP/N	TP/P		e-value	FP/N	TP/P		e-value	FP/N	TP/P		e-value	FP/N	TP/P
	-	0	0		-	0	0		-	0	0		-	0	0
	1.5e-93	4.19995e-06	0.04		6.9e-92	4.20948e-06	0.2		9.4e-75	2.51997e-05	0.04		7.3e-189	4.20948e-06	0.2
	3.1e-93	8.3999e-06	0.08		4.2e-86	8.41896e-06	0.4		6.1e-72	2.93997e-05	0.08		6.8e-72	1.26284e-05	0.4
	3.3e-92	8.3999e-06	0.12		1e-84	8.41896e-06	0.6		6.8e-72	2.93997e-05	0.12		3.8e-68	1.26284e-05	0.6
	6.2e-92	8.3999e-06	0.16		1.3e-84	8.41896e-06	0.8		1e-70	2.93997e-05	0.16		1.2e-62	1.26284e-05	0.8
	6.9e-92	8.3999e-06	0.24		3.9e-40	1.26284e-05	1		1.4e-70	2.93997e-05	0.24		1.7e-16	1.68379e-05	1
	4.5e-91	1.25999e-05	0.28		100000	0.285011	1		7.7e-70	2.93997e-05	0.36		100000	0.365362	1
	4.6e-91	1.25999e-05	0.32		110000	0.304548	1		1.9e-68	2.93997e-05	0.4		110000	0.388194	1
	8.1e-91	1.25999e-05	0.44		120000	0.324277	1		1.5e-65	3.35996e-05	0.44		120000	0.410092	1
	1.1e-90	1.25999e-05	0.48		130000	0.343641	1		1.4e-62	3.77996e-05	0.48		130000	0.431164	1
	6.4e-90	1.67998e-05	0.52		140000	0.362777	1		1.6e-61	4.19995e-05	0.52		140000	0.451328	1
	1.7e-88	2.09998e-05	0.56		150000	0.382734	1		8.5e-56	4.19995e-05	0.56		150000	0.471024	1
	4.5e-86	2.51997e-05	0.6		160000	0.40246	1		1.3e-47	4.19995e-05	0.6		160000	0.489962	1
	1.6e-85	2.51997e-05	0.64		170000	0.422922	1		3.2e-42	4.61995e-05	0.64		170000	0.509313	1
	1e-84	2.93997e-05	0.68		180000	0.444521	1		3.4e-28	4.61995e-05	0.68		180000	0.528323	1
	1.7e-80	3.35996e-05	0.72		190000	0.468002	1		1.7e-16	6.29993e-05	0.72		190000	0.547611	1
	2.2e-80	3.35996e-05	0.76		200000	0.493296	1		1.3e-14	6.71992e-05	0.76		200000	0.568141	1
	1.2e-56	5.87993e-05	0.8		210000	0.5231	1		4.6e-12	6.71992e-05	0.8		210000	0.590523	1
	6.4e-53	5.87993e-05	0.84		220000	0.559469	1		2.3e-09	0.000100799	0.84		220000	0.61732	1
	5.4e-51	5.87993e-05	0.88		230000	0.62741	1		7.8e-06	0.000130198	0.88		230000	0.663334	1
	3.9e-40	5.87993e-05	0.92		240000	1	1		0.043	0.000138598	0.92		240000	1	1
	7.2e-15	7.13992e-05	0.96						0.55	0.000138598	0.96
	3e-10	7.55991e-05	1						6700	0.0225789	1
	100000	0.285143	1						100000	0.365177	1
	110000	0.304732	1						110000	0.388033	1
	120000	0.324366	1						120000	0.409961	1
	130000	0.343762	1						130000	0.430856	1
	140000	0.362838	1						140000	0.451071	1
	150000	0.382607	1						150000	0.470735	1
	160000	0.402255	1						160000	0.489626	1
	170000	0.422696	1						170000	0.509	1
	180000	0.444057	1						180000	0.527766	1
	190000	0.467417	1						190000	0.547123	1
	200000	0.492553	1						200000	0.567384	1
	210000	0.521823	1						210000	0.589585	1
	220000	0.557712	1						220000	0.615977	1
	230000	0.621274	1						230000	0.65946	1
	240000	1	1						240000	1	1

## Sheet: IS1
	IS1.original.search.original				IS1.original.search.uniq				IS1.uniq.search.original				IS1.uniq.search.uniq				Transposase_27.pfam.search.original				Transposase_27.pfam.search.uniq
	e-value	FP/N	TP/P		e-value	FP/N	TP/P		e-value	FP/N	TP/P		e-value	FP/N	TP/P		e-value	FP/N	TP/P		e-value	FP/N	TP/P
	-	0	0		-	0	0		-	0	0		-	0	0		-	0	0		-	0	0
	3.3e-130	0	0.174757		2.4e-249	0	0.030303		2e-127	0	0.0970874		1.7e-254	0	0.030303		8.9e-112	0	0.038835		4.3e-212	0	0.030303
	2.6e-115	0	0.31068		2.9e-127	0	0.0606061		6.2e-123	0	0.145631		1.3e-133	0	0.0606061		1.2e-111	0	0.0582524		8.9e-112	0	0.0909091
	1.8e-105	0	0.436893		2.9e-125	0	0.121212		9.6e-120	0	0.184466		1e-131	0	0.0909091		7.5e-111	0	0.0970874		7.5e-111	0	0.151515
	1.6e-104	0	0.456311		2.1e-123	0	0.151515		1.6e-119	0	0.213592		2.2e-131	0	0.121212		3.6e-110	0	0.15534		3.6e-110	0	0.242424
	7.8e-103	0	0.475728		1.4e-122	0	0.242424		4.2e-100	0	0.349515		1.2e-130	0	0.181818		1.5e-109	0	0.174757		1.4e-96	0	0.272727
	2.4e-101	0	0.495146		1.9e-119	0	0.272727		4.4e-94	0	0.38835		2.3e-129	0	0.272727		1.5e-104	0	0.194175		1.7e-65	0	0.333333
	1e-58	0	0.524272		3.6e-119	0	0.30303		1.2e-38	0	0.572816		6.1e-123	0	0.333333		9.3e-102	0	0.213592		3e-20	0	0.393939
	6.1e-38	0	0.660194		6.7e-114	0	0.333333		6.7e-28	0	0.669903		2.1e-122	0	0.393939		2.1e-100	0	0.242718		9.4e-07	0	0.454545
	3.7e-06	0	0.84466		1.8e-105	0	0.393939		1.2e-07	0	0.776699		9.5e-120	0	0.454545		3.6e-93	0	0.271845		0.00017	0	0.515152
	4e-06	0	0.873786		1.5e-104	0	0.454545		4.3e-06	0	0.864078		1.6e-119	0	0.515152		2.2e-87	0	0.291262		0.081	0	0.575758
	100000	0.344118	1		2.4e-101	0	0.515152		4.4e-06	0	0.893204		3.6e-119	0	0.575758		1.7e-65	0	0.320388		0.77	0	0.636364
	110000	0.366712	1		5.5e-88	0	0.575758		0.00016	0	0.941748		2.2e-37	0	0.606061		8.4e-58	0	0.339806		34	4.62753e-05	0.69697
	120000	0.388061	1		2.4e-38	0	0.606061		100000	0.287774	1		3.2e-36	0	0.636364		1.8e-20	0	0.38835		2200	0.00514917	0.787879
	130000	0.408697	1		8.7e-36	0	0.636364		110000	0.306435	1		3e-34	0	0.666667		6e-18	0	0.407767		12000	0.0355646	0.848485
	140000	0.429136	1		3.1e-35	0	0.666667		120000	0.324287	1		2.6e-29	0	0.727273		1.5e-14	0	0.446602		75000	0.291589	0.848485
	150000	0.448795	1		4.7e-28	0	0.727273		130000	0.341748	1		3.4e-23	0	0.787879		2.8e-14	0	0.466019		100000	0.412843	0.848485
	160000	0.468752	1		4.3e-23	0	0.787879		140000	0.359298	1		1.3e-14	0	0.818182		9.5e-07	0	0.543689		110000	0.45099	0.848485
	170000	0.489523	1		8e-15	0	0.818182		150000	0.376667	1		6.9e-08	0	0.848485		2.8e-05	0	0.582524		120000	0.485747	0.848485
	180000	0.510305	1		5.1e-08	0	0.848485		160000	0.393701	1		2e-07	0	0.909091		0.00017	0	0.61165		130000	0.522048	0.848485
	190000	0.531873	1		5.6e-06	0	0.909091		170000	0.411083	1		1.1e-06	0	0.939394		0.00018	0	0.631068		140000	0.55256	0.848485
	200000	0.554836	1		9.4e-06	0	0.939394		180000	0.429304	1		1.6e-06	0	0.969697		0.0018	0	0.650485		150000	0.587027	0.878788
	210000	0.580785	1		2.2e-05	0	0.969697		190000	0.448753	1		2e-06	0	1		0.015	0	0.679612		160000	0.615608	0.878788
	220000	0.612438	1		3.1e-05	0	1		200000	0.469704	1		100000	0.287298	1		0.081	0	0.708738		170000	0.65596	0.878788
	230000	0.665091	1		100000	0.34385	1		210000	0.493775	1		110000	0.306111	1		0.77	0	0.728155		180000	0.686611	0.878788
	240000	1	1		110000	0.366538	1		220000	0.523398	1		120000	0.324032	1		2200	0.00512444	0.76699		190000	0.728188	0.878788
					120000	0.387795	1		230000	0.573229	1		130000	0.341676	1		6000	0.0150085	0.796117		200000	0.758662	0.878788
					130000	0.408501	1		240000	1	1		140000	0.359277	1		12000	0.0354475	0.815534		210000	0.816123	0.878788
					140000	0.428909	1						150000	0.376668	1		72000	0.264202	0.825243		220000	0.898119	0.969697
					150000	0.448849	1						160000	0.393702	1		75000	0.286122	0.825243		230000	0.941491	0.969697
					160000	0.468958	1						170000	0.411257	1		100000	0.411679	0.825243		240000	1	1
					170000	0.489731	1						180000	0.429699	1		110000	0.450083	0.825243
					180000	0.510542	1						190000	0.449131	1		120000	0.484281	0.825243
					190000	0.532401	1						200000	0.47046	1		130000	0.520508	0.825243
					200000	0.555501	1						210000	0.494906	1		140000	0.551125	0.825243
					210000	0.581928	1						220000	0.525519	1		150000	0.583507	0.834951
					220000	0.614535	1						230000	0.579985	1		160000	0.614216	0.834951
					230000	0.672266	1						240000	1	1		170000	0.654159	0.834951
					240000	1	1										180000	0.684687	0.84466
																	190000	0.726685	0.84466
																	200000	0.756656	0.84466
																	210000	0.814329	0.84466
																	220000	0.896056	0.873786
																	230000	0.937408	0.873786
																	240000	1	1

## Sheet: IS3_IS2_ORF1
	IS3_IS2_ORF1.original.search.original				IS3_IS2_ORF1.original.search.uniq				IS3_IS2_ORF1.uniq.search.original				IS3_IS2_ORF1.uniq.search.uniq
	e-value	FP/N	TP/P		e-value	FP/N	TP/P		e-value	FP/N	TP/P		e-value	FP/N	TP/P
	-	0	0		-	0	0		-	0	0		-	0	0
	2.5e-93	0	0.1		2.5e-93	0	0.2		1.1e-115	4.19969e-06	0.1		7.2e-124	0	0.2
	2.8e-93	0	0.2		1.5e-89	0	0.4		3.2e-53	3.35975e-05	0.2		1.9e-99	0	0.4
	1.2e-91	0	0.3		1.2e-83	0	0.6		1e-51	3.35975e-05	0.3		1.4e-69	4.20948e-06	0.6
	1.7e-91	0	0.4		85000	0.437782	0.8		8.2e-48	3.35975e-05	0.4		1.1e-54	8.41896e-06	0.8
	1.4e-89	0	0.5		86000	0.441002	1		5.2e-46	3.35975e-05	0.5		1e-51	8.41896e-06	1
	1.5e-89	0	0.6		100000	0.495523	1		2.1e-43	3.35975e-05	0.6		100000	0.371049	1
	5.3e-89	0	0.7		110000	0.521719	1		3e-42	3.35975e-05	0.7		110000	0.391162	1
	3e-88	0	0.8		120000	0.547056	1		3.8e-30	3.77972e-05	0.8		120000	0.410231	1
	1.5e-87	0	0.9		130000	0.570662	1		1.5e-19	3.77972e-05	0.9		130000	0.428188	1
	2.3e-83	0	1		140000	0.592884	1		2.3e-19	3.77972e-05	1		140000	0.446277	1
	100000	0.495193	1		150000	0.614344	1		100000	0.370589	1		150000	0.463481	1
	110000	0.521345	1		160000	0.634983	1		110000	0.390789	1		160000	0.481005	1
	120000	0.546707	1		170000	0.655231	1		120000	0.409768	1		170000	0.497519	1
	130000	0.570225	1		180000	0.675638	1		130000	0.427667	1		180000	0.51511	1
	140000	0.592462	1		190000	0.696602	1		140000	0.445751	1		190000	0.532474	1
	150000	0.613667	1		200000	0.7177	1		150000	0.462881	1		200000	0.551661	1
	160000	0.634342	1		210000	0.740991	1		160000	0.480419	1		210000	0.572746	1
	170000	0.654769	1		220000	0.769249	1		170000	0.496915	1		220000	0.599489	1
	180000	0.675032	1		230000	0.814572	1		180000	0.514361	1		230000	0.646669	1
	190000	0.695846	1		240000	1	1		190000	0.531664	1		240000	1	1
	200000	0.716803	1						200000	0.550751	1
	210000	0.739997	1						210000	0.571598	1
	220000	0.767715	1						220000	0.597918	1
	230000	0.810779	1						230000	0.642418	1
	240000	1	1						240000	1	1

## Sheet: IS3_IS2_ORF2
	IS3_IS2_ORF2.original.search.original				IS3_IS2_ORF2.original.search.uniq				IS3_IS2_ORF2.uniq.search.original				IS3_IS2_ORF2.uniq.search.uniq
	e-value	FP/N	TP/P		e-value	FP/N	TP/P		e-value	FP/N	TP/P		e-value	FP/N	TP/P
	-	0	0		-	0	0		-	0	0		-	0	0
	4.7e-257	0	0.111111		1.4e-239	4.20945e-06	0.333333		7.8e-264	0	0.111111		8.1e-265	0	0.333333
	1.9e-256	0	0.222222		5e-229	4.20945e-06	0.666667		2.5e-240	0	0.222222		2.5e-240	0	0.666667
	2.3e-248	0	0.333333		3.4e-201	8.41889e-06	1		4.2e-232	0	0.333333		1.3e-223	0	1
	2.9e-242	0	0.444444		100000	0.340662	1		1.3e-212	0	0.444444		100000	0.322662	1
	1.8e-240	0	0.555556		110000	0.361878	1		4e-210	0	0.555556		110000	0.343019	1
	2e-231	0	0.666667		120000	0.38242	1		2.2e-207	0	0.666667		120000	0.362922	1
	5e-229	0	0.777778		130000	0.402305	1		2.1e-172	4.19967e-06	0.777778		130000	0.382369	1
	6.3e-228	0	0.888889		140000	0.42142	1		1.2e-140	4.19967e-06	0.888889		140000	0.401068	1
	3.1e-222	0	1		150000	0.439862	1		8.1e-139	4.19967e-06	1		150000	0.419412	1
	100000	0.340375	1		160000	0.458644	1		100000	0.322455	1		160000	0.436734	1
	110000	0.361592	1		170000	0.477132	1		110000	0.342664	1		170000	0.454708	1
	120000	0.382132	1		180000	0.495401	1		120000	0.36257	1		180000	0.472721	1
	130000	0.401841	1		190000	0.514672	1		130000	0.38201	1		190000	0.491453	1
	140000	0.421017	1		200000	0.535669	1		140000	0.400598	1		200000	0.511481	1
	150000	0.439382	1		210000	0.559629	1		150000	0.418955	1		210000	0.534069	1
	160000	0.458125	1		220000	0.58976	1		160000	0.436228	1		220000	0.562992	1
	170000	0.476646	1		230000	0.642538	1		170000	0.454047	1		230000	0.611801	1
	180000	0.494759	1		240000	1	1		180000	0.472081	1		240000	1	1
	190000	0.513968	1						190000	0.490639	1
	200000	0.534836	1						200000	0.510638	1
	210000	0.558501	1						210000	0.532871	1
	220000	0.588143	1						220000	0.561357	1
	230000	0.637459	1						230000	0.606961	1
	240000	1	1						240000	1	1

## Sheet: IS3_IS2
	IS3_IS2.original.search.original				IS3_IS2.original.search.uniq				IS3_IS2.uniq.search.original				IS3_IS2.uniq.search.uniq				Transposase_8.pfam.search.original				Transposase_8.pfam.search.uniq
	e-value	FP/N	TP/P		e-value	FP/N	TP/P		e-value	FP/N	TP/P		e-value	FP/N	TP/P		e-value	FP/N	TP/P		e-value	FP/N	TP/P
	-	0	0		-	0	0		-	0	0		-	0	0		-	0	0		-	0	0
	0	0	0.241379		0	0	0.142857		0	0	0.172414		0	0	0.214286		1.2e-36	0	0.0689655		1.4e-33	4.20651e-06	0.142857
	1.4e-303	0	0.310345		1.2e-275	0	0.214286		1.3e-296	0	0.206897		1.4e-192	0	0.357143		4.2e-34	0	0.137931		1.6e-32	4.20651e-06	0.285714
	1.9e-301	0	0.344828		1.8e-170	0	0.357143		5.7e-284	0	0.241379		1.9e-189	0	0.428571		1.4e-33	0	0.206897		2.9e-26	7.15106e-05	0.428571
	2.2e-293	0	0.37931		1.6e-167	0	0.428571		1.7e-261	0	0.310345		3.6e-181	0	0.5		1.6e-32	0	0.275862		2600	0.0300681	0.571429
	1.4e-181	0	0.413793		6.1e-164	0	0.5		5e-256	0	0.344828		7.5e-165	0	0.714286		7.3e-32	0	0.344828		25000	0.164125	0.642857
	3.4e-180	0	0.448276		8.7e-149	0	0.714286		5.6e-252	0	0.37931		3.9e-157	0	0.785714		1.5e-30	0	0.413793		40000	0.233432	0.714286
	5.1e-173	0	0.482759		3.4e-136	0	0.785714		1.2e-188	0	0.413793		2.2e-06	8.41301e-06	0.857143		5.6e-30	0	0.482759		100000	0.488304	0.714286
	1.5e-171	0	0.517241		4.5e-07	8.41301e-06	0.857143		3.8e-184	0	0.448276		2.5e-06	8.41301e-06	0.928571		1.7e-27	8.80359e-05	0.517241		110000	0.519672	0.928571
	3.7e-168	0	0.551724		1.9e-06	8.41301e-06	0.928571		3.6e-181	0	0.482759		5.7e-06	8.41301e-06	1		2.1e-27	8.80359e-05	0.551724		120000	0.552255	0.928571
	6.1e-164	0	0.586207		8.3e-05	3.3652e-05	1		3.8e-180	0	0.517241		110000	0.30294	1		2.9e-26	0.000163495	0.62069		130000	0.589121	0.928571
	2.3e-163	0	0.62069		110000	0.27895	1		2e-176	0	0.551724		120000	0.316144	1		5.4e-26	0.000176072	0.689655		140000	0.632284	0.928571
	3.7e-161	0	0.655172		120000	0.291061	1		3.7e-175	0	0.586207		130000	0.328654	1		510	0.0110548	0.724138		150000	0.65873	0.928571
	2.8e-154	0	0.689655		130000	0.303045	1		8.9e-173	0	0.62069		140000	0.341021	1		2600	0.0310054	0.758621		160000	0.68524	0.928571
	3.7e-07	1.25766e-05	0.724138		140000	0.31447	1		8.9e-140	0	0.655172		150000	0.353216	1		21000	0.143935	0.827586		170000	0.71726	1
	4.5e-07	2.51531e-05	0.758621		150000	0.325815	1		1.1e-129	0	0.689655		160000	0.364961	1		25000	0.164673	0.862069		180000	0.741191	1
	6.7e-07	2.51531e-05	0.793103		160000	0.337059	1		2.3e-06	2.09609e-05	0.724138		170000	0.377235	1		40000	0.233907	0.896552		190000	0.765012	1
	1.1e-06	2.51531e-05	0.827586		170000	0.34906	1		3.8e-06	2.51531e-05	0.758621		180000	0.389413	1		100000	0.488042	0.896552		200000	0.789645	1
	1.9e-06	2.93453e-05	0.862069		180000	0.360855	1		8.3e-06	2.93453e-05	0.793103		190000	0.402129	1		110000	0.519617	0.931034		210000	0.817105	1
	4.1e-06	3.35375e-05	0.896552		190000	0.373327	1		1.4e-05	3.35375e-05	0.827586		200000	0.415965	1		120000	0.550782	0.965517		220000	0.853121	1
	7.6e-06	4.19219e-05	0.931034		200000	0.386288	1		3.3e-05	7.96515e-05	0.862069		210000	0.43131	1		130000	0.588927	0.965517		230000	0.921704	1
	8e-06	4.19219e-05	0.965517		210000	0.401292	1		5.8e-05	8.80359e-05	0.896552		220000	0.450761	1		140000	0.631645	0.965517		240000	1	1
	9.3e-05	0.000117381	1		220000	0.420264	1		0.0021	0.000163495	0.931034		230000	0.485544	1		150000	0.658157	0.965517
	110000	0.278634	1		230000	0.454862	1		0.24	0.00044018	0.965517		240000	1	1		160000	0.683406	0.965517
	120000	0.290732	1		240000	1	1		0.26	0.000452756	1						170000	0.716541	1
	130000	0.302663	1						110000	0.302592	1						180000	0.739351	1
	140000	0.313999	1						120000	0.315856	1						190000	0.763762	1
	150000	0.325356	1						130000	0.328269	1						200000	0.788148	1
	160000	0.336486	1						140000	0.34059	1						210000	0.815439	1
	170000	0.34845	1						150000	0.352718	1						220000	0.851613	1
	180000	0.360205	1						160000	0.364402	1						230000	0.912358	1
	190000	0.37266	1						170000	0.376538	1						240000	1	1
	200000	0.385493	1						180000	0.388846	1
	210000	0.400186	1						190000	0.401385	1
	220000	0.418665	1						200000	0.415169	1
	230000	0.450392	1						210000	0.430336	1
	240000	1	1						220000	0.449306	1
									230000	0.480873	1
									240000	1	1

## Sheet: IS3_IS3_ORF1
	IS3_IS3_ORF1.original.search.original				IS3_IS3_ORF1.original.search.uniq				IS3_IS3_ORF1.uniq.search.original				IS3_IS3_ORF1.uniq.search.uniq
	e-value	FP/N	TP/P		e-value	FP/N	TP/P		e-value	FP/N	TP/P		e-value	FP/N	TP/P
	-	0	0		-	0	0		-	0	0		-	0	0
	1e-34	0	0.0322581		3.5e-33	0	0.0526316		5.7e-150	1.68002e-05	0.0322581		6.8e-161	0	0.0526316
	1.1e-34	0	0.0645161		1.7e-32	0	0.105263		1.2e-147	2.52003e-05	0.0645161		1.5e-158	0	0.105263
	2.1e-34	0	0.0967742		2.9e-32	0	0.157895		1.2e-64	0.000205803	0.0967742		6.4e-152	4.20973e-06	0.157895
	6.9e-34	0	0.129032		4.4e-29	4.20973e-06	0.210526		2.4e-19	0.000386405	0.129032		3.1e-150	4.20973e-06	0.210526
	3.5e-33	0	0.16129		4.3e-23	8.41946e-06	0.263158		3.4e-06	0.000432606	0.16129		5.4e-150	4.20973e-06	0.263158
	3.6e-33	0	0.193548		7.2e-23	8.41946e-06	0.315789		24	0.00073501	0.193548		5.7e-150	4.20973e-06	0.315789
	1.7e-32	0	0.225806		2.6e-20	1.26292e-05	0.368421		2500	0.0145154	0.258065		7.3e-148	4.20973e-06	0.368421
	3.2e-32	0	0.258065		1e-19	1.26292e-05	0.421053		3000	0.0178376	0.290323		5.5e-138	4.20973e-06	0.421053
	8.5e-32	0	0.322581		12	0.000244164	0.473684		5300	0.0314626	0.322581		6.7e-136	8.41946e-06	0.473684
	4.1e-31	4.20006e-06	0.354839		2200	0.0245511	0.526316		110000	0.314987	0.322581		7.8e-125	1.26292e-05	0.526316
	4.6e-31	4.20006e-06	0.387097		4200	0.0436254	0.578947		120000	0.329776	0.322581		6.4e-111	1.68389e-05	0.578947
	8.5e-31	4.20006e-06	0.419355		19000	0.149504	0.631579		130000	0.344518	0.322581		8.8e-09	0.000168389	0.631579
	1.6e-30	8.40011e-06	0.451613		20000	0.155019	0.684211		140000	0.358773	0.322581		0.031	0.000256793	0.684211
	1.5e-29	8.40011e-06	0.483871		29000	0.199246	0.736842		150000	0.372868	0.322581		5	0.0003031	0.736842
	1.7e-29	8.40011e-06	0.516129		31000	0.208078	0.789474		160000	0.387191	0.387097		8.8	0.000328359	0.789474
	6.2e-29	8.40011e-06	0.548387		78000	0.361742	0.842105		170000	0.401496	0.387097		2200	0.012305	0.842105
	2.9e-26	1.26002e-05	0.580645		97000	0.407489	0.947368		180000	0.415969	0.387097		3000	0.0174199	0.894737
	3.2e-25	2.10003e-05	0.612903		100000	0.423764	0.947368		190000	0.431186	0.387097		3100	0.0181439	0.947368
	9.5e-25	2.10003e-05	0.645161		110000	0.445288	1		200000	0.44765	0.387097		110000	0.314804	0.947368
	3.3e-24	2.10003e-05	0.677419		120000	0.465815	1		210000	0.466946	0.387097		120000	0.329613	0.947368
	3.6e-24	2.10003e-05	0.709677		130000	0.486009	1		220000	0.490844	0.387097		130000	0.344545	0.947368
	3.8e-24	2.10003e-05	0.741935		140000	0.505854	1		230000	0.532315	0.387097		140000	0.358783	0.947368
	5.3e-24	2.10003e-05	0.774194		150000	0.524713	1		240000	1	1		150000	0.372864	0.947368
	7.2e-23	2.52003e-05	0.806452		160000	0.543152	1						160000	0.38732	1
	8.4e-23	2.52003e-05	0.83871		170000	0.562959	1						170000	0.401629	1
	1.6e-21	3.36005e-05	0.870968		180000	0.5825	1						180000	0.416199	1
	1.1e-20	4.62006e-05	0.903226		190000	0.60256	1						190000	0.431455	1
	1e-19	5.04007e-05	0.935484		200000	0.624564	1						200000	0.448134	1
	1.9e-16	9.66013e-05	0.967742		210000	0.648942	1						210000	0.467583	1
	2.5e-11	0.000138602	1		220000	0.679665	1						220000	0.491957	1
	100000	0.424008	1		230000	0.732556	1						230000	0.5365	1
	110000	0.445408	1		240000	1	1						240000	1	1
	120000	0.465866	1
	130000	0.486064	1
	140000	0.505846	1
	150000	0.524667	1
	160000	0.543118	1
	170000	0.562677	1
	180000	0.582271	1
	190000	0.602288	1
	200000	0.623981	1
	210000	0.64809	1
	220000	0.678297	1
	230000	0.727979	1
	240000	1	1

## Sheet: IS3_IS3_ORF2
	IS3_IS3_ORF2.original.search.original				IS3_IS3_ORF2.original.search.uniq				IS3_IS3_ORF2.uniq.search.original				IS3_IS3_ORF2.uniq.search.uniq
	e-value	FP/N	TP/P		e-value	FP/N	TP/P		e-value	FP/N	TP/P		e-value	FP/N	TP/P
	-	0	0		-	0	0		-	0	0		-	0	0
	2e-167	0	0.0384615		7.5e-166	4.20953e-06	0.125		3.7e-185	0	0.0384615		9.1e-187	0	0.125
	4.9e-167	0	0.0769231		9.5e-158	8.41907e-06	0.25		1.1e-183	0	0.0769231		8.9e-186	0	0.25
	2.1e-165	0	0.115385		6.2e-155	8.41907e-06	0.375		2.7e-182	0	0.115385		1.2e-183	0	0.375
	5.8e-165	0	0.153846		1.7e-148	2.10477e-05	0.5		5.6e-175	0	0.153846		5.6e-175	4.20953e-06	0.5
	2.3e-161	4.19997e-06	0.192308		4.5e-141	2.94667e-05	0.625		1.3e-172	0	0.192308		8.6e-166	4.20953e-06	0.625
	4.8e-161	4.19997e-06	0.230769		4.4e-116	4.63049e-05	0.75		5.6e-170	0	0.230769		1.1e-156	4.20953e-06	0.75
	6.4e-158	4.19997e-06	0.269231		5.8e-108	4.63049e-05	0.875		1.1e-156	4.19997e-06	0.269231		1.7e-152	4.20953e-06	0.875
	9.1e-155	4.19997e-06	0.307692		6e-107	4.63049e-05	1		1.6e-156	4.19997e-06	0.307692		7.9e-140	4.20953e-06	1
	5.3e-154	4.19997e-06	0.346154		100000	0.307839	1		7.9e-140	4.19997e-06	0.346154		110000	0.288492	1
	3.4e-153	4.19997e-06	0.384615		110000	0.325991	1		2.8e-120	4.19997e-06	0.384615		120000	0.30573	1
	1.1e-150	4.19997e-06	0.423077		120000	0.343161	1		1.3e-100	8.39994e-06	0.423077		130000	0.32293	1
	1.6e-149	4.19997e-06	0.461538		130000	0.360281	1		1.5e-96	1.25999e-05	0.461538		140000	0.339587	1
	1.8e-148	4.19997e-06	0.538462		140000	0.376644	1		1.2e-95	1.25999e-05	0.5		150000	0.355878	1
	5.9e-147	1.25999e-05	0.576923		150000	0.393318	1		1.5e-95	1.25999e-05	0.538462		160000	0.372666	1
	2.2e-144	1.25999e-05	0.615385		160000	0.410446	1		4.5e-88	2.09998e-05	0.576923		170000	0.389319	1
	1e-132	1.25999e-05	0.653846		170000	0.4272	1		4.2e-85	2.51998e-05	0.615385		180000	0.406599	1
	7.9e-125	1.67999e-05	0.692308		180000	0.444712	1		7.3e-82	3.35998e-05	0.653846		190000	0.424856	1
	7.1e-123	2.09998e-05	0.730769		190000	0.463373	1		1.9e-79	3.35998e-05	0.692308		200000	0.444586	1
	9.9e-110	2.93998e-05	0.769231		200000	0.483267	1		1.3e-77	3.77997e-05	0.730769		210000	0.467292	1
	1.1e-107	3.35998e-05	0.807692		210000	0.506857	1		2.1e-52	0.000113399	0.769231		220000	0.495925	1
	6e-107	3.77997e-05	0.846154		220000	0.535634	1		7.9e-49	0.000138599	0.807692		230000	0.5462	1
	1e-98	6.29995e-05	0.884615		230000	0.587689	1		1.8e-39	0.000214198	0.846154		240000	1	1
	1.9e-96	7.13995e-05	0.923077		240000	1	1		2.3e-35	0.000243598	0.884615
	3.5e-88	8.39994e-05	0.961538						1.9e-14	0.000302398	0.923077
	1.4e-69	0.000172199	1						3.5e-07	0.000386397	0.961538
	100000	0.308009	1						1.1e-05	0.000432597	1
	110000	0.326195	1						110000	0.288542	1
	120000	0.343276	1						120000	0.305846	1
	130000	0.360336	1						130000	0.322944	1
	140000	0.376716	1						140000	0.339605	1
	150000	0.393264	1						150000	0.355792	1
	160000	0.410236	1						160000	0.372571	1
	170000	0.427007	1						170000	0.389228	1
	180000	0.444378	1						180000	0.406322	1
	190000	0.46287	1						190000	0.424302	1
	200000	0.482568	1						200000	0.44384	1
	210000	0.505995	1						210000	0.466335	1
	220000	0.534265	1						220000	0.494521	1
	230000	0.583061	1						230000	0.541586	1
	240000	1	1						240000	1	1

## Sheet: IS3_IS3
	IS3_IS3.original.search.original				IS3_IS3.original.search.uniq				IS3_IS3.uniq.search.original				IS3_IS3.uniq.search.uniq
	e-value	FP/N	TP/P		e-value	FP/N	TP/P		e-value	FP/N	TP/P		e-value	FP/N	TP/P
	-	0	0		-	0	0		-	0	0		-	0	0
	3.7e-206	0	0.0113636		8.9e-197	0	0.0217391		2.1e-207	0	0.0113636		8.6e-210	0	0.0217391
	1.2e-205	0	0.0227273		1.8e-195	0	0.0434783		1e-202	0	0.0227273		8e-207	0	0.0434783
	1.5e-205	0	0.0340909		7.4e-191	0	0.0652174		1.3e-185	0	0.0340909		4.5e-203	0	0.0652174
	1.1e-200	0	0.0454545		5.3e-180	0	0.0869565		2.1e-176	0	0.0454545		1.3e-201	0	0.0869565
	1.4e-200	0	0.0568182		1.7e-154	4.20707e-06	0.108696		6.4e-169	0	0.0568182		3.9e-194	0	0.108696
	3.3e-198	0	0.0795455		1.3e-143	4.20707e-06	0.130435		1.4e-166	0	0.0681818		1.6e-183	0	0.130435
	1e-195	0	0.0909091		4.6e-143	4.20707e-06	0.152174		6.3e-164	0	0.0909091		1.4e-181	0	0.152174
	2.8e-195	0	0.102273		3.7e-137	8.41414e-06	0.173913		2e-158	0	0.102273		5.4e-162	0	0.173913
	4.3e-195	0	0.113636		4e-128	8.41414e-06	0.217391		4.7e-158	0	0.113636		2.5e-142	0	0.195652
	4.5e-192	4.19322e-06	0.125		3.7e-126	8.41414e-06	0.23913		1e-157	0	0.125		6.7e-136	0	0.23913
	1.3e-191	4.19322e-06	0.147727		2.9e-123	8.41414e-06	0.282609		1.8e-157	0	0.136364		1.9e-132	0	0.282609
	1.3e-189	4.19322e-06	0.159091		3e-120	8.41414e-06	0.304348		1.3e-155	0	0.147727		3.2e-131	0	0.326087
	2e-189	4.19322e-06	0.170455		8.3e-120	8.41414e-06	0.347826		2.4e-155	0	0.159091		1.4e-128	0	0.347826
	7.7e-189	4.19322e-06	0.181818		1.5e-117	8.41414e-06	0.369565		5.7e-154	0	0.181818		1.8e-125	0	0.369565
	3e-186	4.19322e-06	0.193182		1.9e-110	8.41414e-06	0.434783		1.4e-153	0	0.204545		3.1e-119	0	0.434783
	5.3e-186	4.19322e-06	0.204545		1.2e-106	8.41414e-06	0.478261		2.4e-140	4.19322e-06	0.215909		5.9e-119	0	0.478261
	1.2e-183	4.19322e-06	0.215909		1.1e-102	8.41414e-06	0.521739		1.4e-139	4.19322e-06	0.227273		2.5e-117	0	0.521739
	2e-177	4.19322e-06	0.227273		3.5e-101	8.41414e-06	0.565217		1.3e-136	4.19322e-06	0.238636		3e-115	0	0.565217
	8.5e-174	4.19322e-06	0.238636		3.9e-99	8.41414e-06	0.586957		3e-136	8.38645e-06	0.25		8.3e-115	0	0.608696
	7.9e-172	4.19322e-06	0.25		6.2e-98	8.41414e-06	0.630435		3.2e-133	8.38645e-06	0.261364		2.2e-112	0	0.630435
	4.3e-168	4.19322e-06	0.272727		1.1e-88	2.10354e-05	0.673913		1.2e-130	8.38645e-06	0.272727		8.6e-107	4.20707e-06	0.673913
	3.7e-161	4.19322e-06	0.284091		9.9e-75	5.8899e-05	0.695652		1.7e-130	8.38645e-06	0.284091		2.5e-90	3.36566e-05	0.717391
	3.4e-144	1.25797e-05	0.295455		2.6e-64	9.25556e-05	0.717391		7.7e-130	8.38645e-06	0.295455		1.8e-88	3.78636e-05	0.73913
	6.7e-142	1.67729e-05	0.306818		1.4e-57	0.000105177	0.73913		8.8e-130	8.38645e-06	0.306818		1.5e-80	3.78636e-05	0.76087
	1e-135	1.67729e-05	0.318182		1.4e-45	0.000138833	0.782609		6.4e-128	8.38645e-06	0.318182		4.3e-76	4.62778e-05	0.782609
	4.4e-135	2.09661e-05	0.329545		4e-09	0.000290288	0.804348		1.2e-126	1.25797e-05	0.329545		2.4e-21	0.000206147	0.804348
	4.2e-133	2.51593e-05	0.340909		0.37	0.000504849	0.847826		1.2e-124	1.25797e-05	0.340909		38	0.000757273	0.847826
	2.5e-132	2.51593e-05	0.352273		160	0.00138413	0.869565		2.9e-123	1.25797e-05	0.352273		48	0.000799344	0.869565
	4.7e-129	2.93526e-05	0.363636		180	0.0014851	0.891304		4.6e-123	1.25797e-05	0.363636		1700	0.00723616	0.891304
	2.7e-127	3.35458e-05	0.375		210	0.0016071	0.913043		2.1e-122	1.25797e-05	0.375		2700	0.0124824	0.913043
	3.7e-126	3.35458e-05	0.386364		450	0.00262101	0.934783		2.9e-120	1.25797e-05	0.386364		110000	0.272938	0.913043
	1.5e-124	3.7739e-05	0.397727		1600	0.0102737	0.956522		1.2e-118	1.25797e-05	0.397727		120000	0.285946	0.913043
	3.6e-124	3.7739e-05	0.409091		3100	0.0208418	0.978261		8.8e-115	1.67729e-05	0.409091		130000	0.298744	0.913043
	3.7e-124	3.7739e-05	0.420455		14000	0.090797	1		3.3e-101	5.45119e-05	0.420455		140000	0.311033	0.913043
	7.4e-123	3.7739e-05	0.431818		110000	0.359318	1		1e-99	5.45119e-05	0.431818		150000	0.323309	0.913043
	1.6e-120	4.19322e-05	0.443182		120000	0.376217	1		1.1e-88	9.22509e-05	0.443182		160000	0.335203	0.913043
	2.5e-120	4.19322e-05	0.454545		130000	0.392175	1		1.6e-87	9.64441e-05	0.454545		170000	0.347778	0.913043
	1.3e-118	5.03187e-05	0.465909		140000	0.407821	1		9.9e-87	0.000100637	0.465909		180000	0.360799	0.913043
	5.6e-116	5.45119e-05	0.477273		150000	0.423118	1		7.9e-84	0.00011741	0.477273		190000	0.374366	0.913043
	5.9e-113	6.70916e-05	0.488636		160000	0.438217	1		1.5e-80	0.000138376	0.488636		200000	0.388801	0.913043
	4.6e-112	6.70916e-05	0.5		170000	0.453266	1		1.9e-75	0.000146763	0.511364		210000	0.405368	0.913043
	2.7e-108	7.12848e-05	0.511364		180000	0.46834	1		8.8e-60	0.0002474	0.522727		220000	0.426934	0.934783
	7.2e-108	7.12848e-05	0.522727		190000	0.484777	1		1.8e-54	0.000276753	0.534091		230000	0.465197	0.978261
	4.2e-107	7.5478e-05	0.534091		200000	0.501895	1		5.5e-48	0.000339651	0.545455		240000	1	1
	1.6e-106	7.5478e-05	0.545455		210000	0.520739	1		8.3e-44	0.000381583	0.556818
	3.3e-104	7.96713e-05	0.556818		220000	0.544231	1		1.2e-22	0.000461255	0.568182
	1.3e-94	9.22509e-05	0.568182		230000	0.586155	1		2.1e-21	0.000465448	0.579545
	2.6e-89	0.00011741	0.579545		240000	1	1		5.5e-20	0.000473834	0.590909
	6.8e-86	0.000146763	0.590909						2.1e-09	0.000536733	0.602273
	5.2e-71	0.0002474	0.602273						9.2e-07	0.000654143	0.613636
	8.2e-67	0.000255787	0.613636						1.3e-05	0.000691882	0.625
	5e-63	0.000276753	0.625						8.2e-05	0.000725428	0.647727
	9.5e-63	0.000276753	0.647727						0.00048	0.000746394	0.659091
	1.4e-57	0.000301912	0.659091						0.0017	0.000758973	0.681818
	3.3e-49	0.000369004	0.670455						0.013	0.000800906	0.693182
	9.3e-32	0.000444482	0.681818						2.8	0.000956055	0.704545
	4e-06	0.000725428	0.704545						330	0.00199178	0.715909
	21	0.0013586	0.715909						74000	0.213959	0.727273
	54	0.00147601	0.727273						110000	0.273147	0.727273
	63	0.00150956	0.738636						120000	0.286116	0.727273
	98	0.00166052	0.75						130000	0.298767	0.727273
	130	0.00183663	0.761364						140000	0.311037	0.727273
	170	0.00198759	0.772727						150000	0.323331	0.727273
	180	0.00204629	0.784091						160000	0.335244	0.727273
	210	0.00218886	0.806818						170000	0.347761	0.727273
	270	0.00244465	0.818182						180000	0.36055	0.727273
	380	0.00293526	0.829545						190000	0.374153	0.727273
	390	0.00298558	0.840909						200000	0.388326	0.727273
	430	0.00316588	0.852273						210000	0.40468	0.727273
	600	0.00413033	0.875						220000	0.425533	0.738636
	690	0.00468383	0.886364						230000	0.460525	0.761364
	1200	0.0080426	0.897727						240000	1	1
	1500	0.0102147	0.909091
	1600	0.011024	0.931818
	1700	0.0116152	0.943182
	2600	0.0179428	0.954545
	3100	0.021637	0.977273
	5900	0.0407414	0.988636
	6700	0.0460919	1
	110000	0.359716	1
	120000	0.376568	1
	130000	0.392586	1
	140000	0.408114	1
	150000	0.423298	1
	160000	0.438473	1
	170000	0.453392	1
	180000	0.4684	1
	190000	0.484435	1
	200000	0.501459	1
	210000	0.520165	1
	220000	0.543002	1
	230000	0.581437	1
	240000	1	1

[truncated: 38 more sheets: IS3_IS51_ORF1, IS3_IS51_ORF2, IS3_IS51, IS3_IS150_ORF1, IS3_IS150_ORF2, IS3_IS150, IS3_IS407_ORF1, IS3_IS407_ORF2, IS3_IS407, IS4, IS5_IS5, IS5_IS427, IS5_IS903, IS5_IS1031, IS5_ISH1, IS5_ISL2, IS6, IS21_ORF1, IS21_ORF2, IS21 …]
